# Supplementary material for: South America holds the greatest diversity of native daisies (Asteraceae) in the world: an updated catalogue supporting continental-scale conservation
Source: Front Plant Sci. 2024 May 30;15:1393241. doi: 10.3389/fpls.2024.1393241 (PMC11169850; doi:10.3389/fpls.2024.1393241)
Supplement: Supplementary file 1 [file DataSheet_1.xlsx]

## Sheet: Asteraceae South America
Subfamily	Tribe	Taxa full name	Genus	Species	Author	Publication standart	Volume	Page	Fig | tab | pl	Year	Basyonym & Combinations	Synonym	AR	BO	BR	CL	CO	EC	FG	GU	PA	PE	SU	UR	VE	Status	Categ IUCN
Asteroideae	Senecioneae	Abrotanella diemii Cabrera	Abrotanella	diemii	Cabrera	Bol. Soc. Argent. Bot.	11(4)	275		1969		*No	R													Endemic
Asteroideae	Senecioneae	Abrotanella emarginata (Cass. ex Gaudich.) Cass.	Abrotanella	emarginata	(Cass. ex Gaudich.) Cass.	Dict. Sci. Nat. (ed. 2)	36	27		1825	Oligosporus emarginatus Gaudich.		R			R										Native
Asteroideae	Senecioneae	Abrotanella linearifolia A. Gray	Abrotanella	linearifolia	A. Gray	Proc. Amer. Acad. Arts	5	137		1861						R										Endemic
Asteroideae	Senecioneae	Abrotanella purpurea Swenson	Abrotanella	purpurea	Swenson	Pl. Syst. Evol.	197(1-4)	190		1995						R										Endemic
Asteroideae	Senecioneae	Abrotanella submarginata A. Gray	Abrotanella	submarginata	A. Gray	Proc. Amer. Acad. Arts	5	137		1861						R										Endemic
Asteroideae	Senecioneae	Abrotanella trichoachaenia Cabrera	Abrotanella	trichoachaenia	Cabrera	Revista Chilena Hist. Nat.	38	85	f. 18	1934		*No	R			R										Native
Asteroideae	Senecioneae	Abrotanella trilobata Swenson	Abrotanella	trilobata	Swenson	Pl. Syst. Evol.	197(1-4)	185		1995		*No	R			R										Native
Asteroideae	Millerieae	Acanthospermum australe (Loefl.) Kuntze	Acanthospermum	australe	(Loefl.) Kuntze	Revis. Gen. Pl.	1	303		1891	Melampodium australe Loefl.	Centrospermum xanthioides Kunth, Acanthospermum xanthioides (Kunth) DC., Acanthospermum brasilum Schrank, Orcya adhaerens Vell, Acanthospermum hirsutum DC.	R	R	R		R		R	R	R		R	R	R	Native
Asteroideae	Millerieae	Acanthospermum consobrinum S.F. Blake	Acanthospermum	consobrinum	S.F. Blake	Contr. U.S. Natl. Herb.	20(10)	389	pl. 23g	1921											R					Endemic
Asteroideae	Millerieae	Acanthospermum hispidum DC.	Acanthospermum	hispidum	DC.	Prodr. [A. P. de Candolle]	5	522		1836		Acanthospermum humile var. hispidum (DC.) Kuntze	R	R	R		R		R	R	R	R	R	R	R	Native
Asteroideae	Millerieae	Acanthospermum microcarpum B.L. Rob.	Acanthospermum	microcarpum	B.L. Rob.	Proc. Amer. Acad. Arts	38(4)	208		1902		Acanthospermum donii S.F. Blake, Acanthospermum simile S.F. Blake						R				R				Native
Asteroideae	Millerieae	Acanthospermum simile S.F. Blake	Acanthospermum	simile	S.F. Blake	Contr. U.S. Natl. Herb.	20(10)	388		1921												R				Endemic
Asteroideae	Eupatorieae	Acanthostyles buniifolius (Hook. & Arn.) R.M. King & H. Rob.	Acanthostyles	buniifolius	(Hook. & Arn.) R.M. King & H. Rob.	Phytologia	22(2)	111		1971	Eupatorium buniifolium Hook. & Arn.	Eupatorium virgatum D. Don ex Hook. & Arn; Eupatorium pinnatifidum DC. var. virgata (Hook. & Arn.) Baker; Eupatorium pinnatifidum DC; Eupatorium pinnatifissum H. Buek; Eupatorium crithmifolium Griseb; Eupatorium saucechicoënse Hieron; Acanthostyles saucechicoënse (Hieron.) R.M. King & H. Rob; Eupatorium buniifolium Hook. & Arn. var. saucechicoënse (Hieron.) Ariza; Eupatorium buniifolium Hook. & A…	R	R	R									R		Native
Stifftioideae	Stifftieae	Achnopogon steyermarkii Aristeg.	Achnopogon	steyermarkii	Aristeg.	Acta Bot. Venez.	2(5-8)	350	f. 30	1967															R	Endemic
Stifftioideae	Stifftieae	Achnopogon virgatus Maguire, Steyerm. & Wurdack	Achnopogon	virgatus	Maguire, Steyerm. & Wurdack	Mem. New York Bot. Gard.	9(3)	438		1957															R	Endemic
Asteroideae	Gnaphalieae	Achyrocline alata (Kunth) DC.	Achyrocline	alata	(Kunth) DC.	Prodr. [A. P. de Candolle]	6	221		1838	Gnaphalium alatum Kunth	Gnaphalium incanum Kunth; Gnaphalium rufescens Kunth; Achyrocline vauthieriana DC; Achyrocline alata (Kunth) DC. var. vauthieriana (DC.) Baker; Achyrocline pterocaula DC; Achyrocline flavescens Griseb; Achyrocline argentina O. Hoffm	R	R	R		R	R			R	R		R		Native
Asteroideae	Gnaphalieae	Achyrocline albicans Griseb.	Achyrocline	albicans	Griseb.	Abh. Königl. Ges. Wiss. Göttingen	24	187		1879					R											Endemic
Asteroideae	Gnaphalieae	Achyrocline anabelae Deble	Achyrocline	anabelae	Deble	Balduinia	3	6		2005					R											Endemic
Asteroideae	Gnaphalieae	Achyrocline arrojadoana Mattf.	Achyrocline	arrojadoana	Mattf.	Notizbl. Bot. Gart. Berlin-Dahlem	9(85)	382		1925					R											Endemic
Asteroideae	Gnaphalieae	Achyrocline bogotensis (Kunth) DC.	Achyrocline	bogotensis	(Kunth) DC.	Prodr. [A. P. de Candolle]	6	221		1838	Gnaphalium bogotense Kunth						R									Endemic
Asteroideae	Gnaphalieae	Achyrocline celosioides (Kunth) DC.	Achyrocline	celosioides	(Kunth) DC.	Prodr. [A. P. de Candolle]	6	221		1838	Gnaphalium celosioides Kunth			R				R				R			R	Native
Asteroideae	Gnaphalieae	Achyrocline citrina Griseb.	Achyrocline	citrina	Griseb.	Abh. Königl. Ges. Wiss. Göttingen	24	187		1879					R											Endemic
Asteroideae	Gnaphalieae	Achyrocline crassiceps S.F. Blake	Achyrocline	crassiceps	S.F. Blake	Contr. U.S. Natl. Herb.	22(8)	596		1924							R								R	Native
Asteroideae	Gnaphalieae	Achyrocline crassiuscula (Malme) Deble & Marchiori	Achyrocline	crassiuscula	(Malme) Deble & Marchiori	Balduinia	3	11		2005					R											Endemic
Asteroideae	Gnaphalieae	Achyrocline disjuncta Hemsl.	Achyrocline	disjuncta	Hemsl.	Rep. Voy. Challenger, Bot.	1(2)	128		1885					R											Endemic
Asteroideae	Gnaphalieae	Achyrocline flaccida (Weinm.) DC.	Achyrocline	flaccida	(Weinm.) DC.	Prodr. [A. P. de Candolle]	6	220		1838	Gnaphalium flaccidum Weinm.	Achyrocline citrina Griseb; Achyrocline satureioides (Lam.) DC. var. albicans Griseb	R	R	R					R	R			R	R	Native
Asteroideae	Gnaphalieae	Achyrocline flavescens Griseb.	Achyrocline	flavescens	Griseb.	Abh. Königl. Ges. Wiss. Göttingen	19	181		1874					R											Endemic
Asteroideae	Gnaphalieae	Achyrocline flavida S.F. Blake	Achyrocline	flavida	S.F. Blake	Contr. U.S. Natl. Herb.	20(13)	535		1924															R	Endemic
Asteroideae	Gnaphalieae	Achyrocline gaudens V.M. Badillo & Gonz. Sánchez	Achyrocline	gaudens	V.M. Badillo & Gonz. Sánchez	Ernstia n.s.,	8(2-3)	3		1998															R	Endemic
Asteroideae	Gnaphalieae	Achyrocline gertiana Deble & Marchiori	Achyrocline	gertiana	Deble & Marchiori	Balduinia	3	10		2005					R						R					Native
Asteroideae	Gnaphalieae	Achyrocline glandulosa S.F. Blake	Achyrocline	glandulosa	S.F. Blake	Bot. Gaz.	74(4)	414		1922								R								Endemic	Critically Endangered
Asteroideae	Gnaphalieae	Achyrocline hallii Hieron.	Achyrocline	hallii	Hieron.	Bot. Jahrb. Syst.	28(5)	594		1901								R								Endemic	Vulnerable
Asteroideae	Gnaphalieae	Achyrocline hirta Klatt	Achyrocline	hirta	Klatt	Linnaea	42(2)	113		1878							R									Endemic	Data Deficient
Asteroideae	Gnaphalieae	Achyrocline hyperchlora S.F. Blake	Achyrocline	hyperchlora	S.F. Blake	Bot. Gaz.	74(4)	415		1922			R	R												Native
Asteroideae	Gnaphalieae	Achyrocline latifolia Wedd.	Achyrocline	latifolia	Wedd.	Chlor. Andina	1(4-6)	148		1856				R								R				Native
Asteroideae	Gnaphalieae	Achyrocline lehmannii Hieron.	Achyrocline	lehmannii	Hieron.	Bot. Jahrb. Syst.	28(5)	596		1901							R								R	Native
Asteroideae	Gnaphalieae	Achyrocline luisiana Deble	Achyrocline	luisiana	Deble	Balduinia	4	1		2005					R											Endemic
Asteroideae	Gnaphalieae	Achyrocline marchiorii Deble	Achyrocline	marchiorii	Deble	Balduinia	3	5		2005					R											Endemic
Asteroideae	Gnaphalieae	Achyrocline mollis Benth.	Achyrocline	mollis	Benth.	Pl. Hartw.		207		1845							R	R								Native	Critically Endangered
Asteroideae	Gnaphalieae	Achyrocline peruviana M.O. Dillon & Sagást.	Achyrocline	peruviana	M.O. Dillon & Sagást.	Phytologia	60(2)	107		1986												R				Endemic
Asteroideae	Gnaphalieae	Achyrocline ramosissima Britton	Achyrocline	ramosissima	Britton	Mem. Torrey Bot. Club	3(3)	57		1893		Gnaphalium ramosissimum Sch. Bip	R	R								R		R	R	Native
Asteroideae	Gnaphalieae	Achyrocline ribasiana Deble & Marchiori	Achyrocline	ribasiana	Deble & Marchiori	Balduinia	4	5	f. 1	2005					R											Endemic
Asteroideae	Gnaphalieae	Achyrocline rupestris Cabrera	Achyrocline	rupestris	Cabrera	Darwiniana	9(1)	43		1949			R	R												Native
Asteroideae	Gnaphalieae	Achyrocline satureioides (Lam.) DC.	Achyrocline	satureioides	(Lam.) DC.	Prodr. [A. P. de Candolle]	6	220		1838	Gnaphalium saturejoides Lam.	Achyrocline satureioides DC., Achyrocline vargasiana DC.	R	R	R		R	R		R	R	R		R	R	Native
Asteroideae	Gnaphalieae	Achyrocline scandens V.M. Badillo	Achyrocline	scandens	V.M. Badillo	World Wildlife Fund Annual Rep.	2(1-2)	25		1992															R	Endemic
Asteroideae	Gnaphalieae	Achyrocline tombadorensis Deble & Marchiori	Achyrocline	tombadorensis	Deble & Marchiori	Balduinia	4	7	f. 2	2005					R											Endemic
Asteroideae	Gnaphalieae	Achyrocline tomentosa Rusby	Achyrocline	tomentosa	Rusby	Bull. New York Bot. Gard.	4(14)	388		1907		Achyrocline polycephala Rusby	R	R		R					R					Native
Asteroideae	Gnaphalieae	Achyrocline trianae Klatt	Achyrocline	trianae	Klatt	Linnaea	42(2)	113		1878							R	R								Native
Asteroideae	Gnaphalieae	Achyrocline vargasiana DC.	Achyrocline	vargasiana	DC.	Prodr. [A. P. de Candolle]	6	220		1838				R	R					R					R	Native
Asteroideae	Gnaphalieae	Achyrocline vauthieriana DC.	Achyrocline	vauthieriana	DC.	Prodr. [A. P. de Candolle]	6	220		1838				R	R											Native
Asteroideae	Gnaphalieae	Achyrocline venosa Rusby	Achyrocline	venosa	Rusby	Mem. Torrey Bot. Club	3(3)	57		1893			R	R							R					Native
Asteroideae	Gnaphalieae	Achyrocline virescens Klatt	Achyrocline	virescens	Klatt	Bot. Jahrb. Syst.	8(1)	40		1886							R									Endemic
Vernonioideae	Vernonieae	Acilepidopsis echitifolia (Mart. ex DC.) H. Rob.	Acilepidopsis	echitifolia	(Mart. ex DC.) H. Rob.	Phytologia	67(4)	291		1989	Vernonia echitifolia Mart. ex DC.	Vernonia eremophylla auct. non Mart. ex DC.	R	R	R						R					Native
Asteroideae	Heliantheae	Acmella alba (L'Hér.) R.K. Jansen	Acmella	alba	(L'Hér.) R.K. Jansen	Syst. Bot. Monogr.	8	62		1985	Spilanthes alba L'Hér.				R		R	R				R				Native
Asteroideae	Heliantheae	Acmella alpestris (Griseb.) R.K. Jansen	Acmella	alpestris	(Griseb.) R.K. Jansen	Syst. Bot. Monogr.	8	92		1985	Spilanthes alpestris Griseb.		R	R	R						R					Native
Asteroideae	Heliantheae	Acmella bellidioides (Sm.) R.K. Jansen	Acmella	bellidioides	(Sm.) R.K. Jansen	Syst. Bot. Monogr.	8	86		1985	Rudbeckia bellidioides Sm., Spilanthes bellidioides (Sm.) Cabrera	Spilanthes arnicoides DC; Ceratocephalus arnicoides (DC.) Kuntze; Spilanthes doronicoides DC; Ceratocephalus decumbens (Sm.) Kuntze var. doronicoides (DC.) Kuntze; Spilanthes blepharicarpa DC; Spilanthes longifolia DC; Spilanthes sphaerocephala DC; Spilanthes grandis DC; Spilanthes arnicoides DC. var. setosa Chodat; Spilanthes grisea (Chodat) A.H. Moore var. setosa (Chodat) A.H. Moore; Spilanthes…	R	R	R						R			R		Native
Asteroideae	Heliantheae	Acmella brachyglossa Cass.	Acmella	brachyglossa	Cass.	Dict. Sci. Nat. (ed. 2)	50	259		1827				R	R		R	R	R		R	R	R		R	Native
Asteroideae	Heliantheae	Acmella ciliata (Kunth) Cass.	Acmella	ciliata	(Kunth) Cass.	Dict. Sci. Nat. (ed. 2)	24	331		1822	Spilanthes ciliata Kunth, Ceratocephalus ciliatus (Kunth) Kuntze	Spilanthes fimbriata Kunth; Acmella fimbriata (Kunth) Cass; Ceratocephalus fimbriatus (Kunth) Kuntze; Spilanthes poeppigii DC; Ceratocephalus poeppigii (DC.) Kuntze; Spilanthes melampodioides Gardner; Spilanthes popayanensis Hieron	R	R	R		R	R	R	R		R			R	Native
Asteroideae	Heliantheae	Acmella darwinii (D.M. Porter) R.K. Jansen	Acmella	darwinii	(D.M. Porter) R.K. Jansen	Syst. Bot. Monogr.	8	43		1985	Spilanthes darwinii D.M. Porter							R								Endemic
Asteroideae	Heliantheae	Acmella decumbens (Sm.) R.K. Jansen	Acmella	decumbens	(Sm.) R.K. Jansen	Syst. Bot. Monogr.	8	80		1985	Rudbeckia decumbens Sm., Ceratocephalus decumbens (Sm.) Kuntze, Spilanthes decumbens (Sm.) A.H. Moore		R		R						R			R		Native
Asteroideae	Heliantheae	Acmella grisea (Chodat) R.K. Jansen	Acmella	grisea	(Chodat) R.K. Jansen	Syst. Bot. Monogr.	8	88		1985	Spilanthes arnicoides fo. grisea Chodat; Spilanthes arnicoides var. grisea (Chodat) Chodat; Spilanthes grisea (Chodat) A.H. Moore		R		R						R					Native
Asteroideae	Heliantheae	Acmella kalelii M.M. Campos, C.F. Hall & J.U. Santos	Acmella	kalelii	M.M. Campos, C.F. Hall & J.U. Santos	Phytotaxa	403(2)	139	f. 2–3	2019					R											Endemic
Asteroideae	Heliantheae	Acmella leptophylla (DC.) R.K. Jansen	Acmella	leptophylla	(DC.) R.K. Jansen	Syst. Bot. Monogr.	8	84		1985	Spilanthes leptophylla DC., Spilanthes arnicoides var. leptophylla (DC.) Baker	Spilanthes decumbens (Sm.) A.H. Moore var. leptophylla (DC.) A.H. Moore; Spilanthes arnicoides DC. fo. minor Chodat; Spilanthes arnicoides DC. fo. nervosa Chodat; Spilanthes grisea (Chodat) A.H. Moore var. chodatana A.H. Moore	R		R						R					Native
Asteroideae	Heliantheae	Acmella leucantha (Kunth) R.K. Jansen	Acmella	leucantha	(Kunth) R.K. Jansen	Syst. Bot. Monogr.	8	67		1985	Spilanthes leucantha Kunth, Ceratocephalus leucanthus (Kunth) Kuntze							R								Endemic	Vulnerable
Asteroideae	Heliantheae	Acmella marajoensis G.A.R. Silva & J.U. Santos	Acmella	marajoensis	G.A.R. Silva & J.U. Santos	Acta Amazonica	41(2)	192	f. 1	2011					R											Endemic
Asteroideae	Heliantheae	Acmella mutisii Cass.	Acmella	mutisii	Cass.	Dict. Sci. Nat. (ed. 2)	24	331		1822							R									Endemic
Asteroideae	Heliantheae	Acmella oppositifolia (Lam.) R.K. Jansen	Acmella	oppositifolia	(Lam.) R.K. Jansen	Syst. Bot. Monogr.	8	30		1985	Anthemis oppositifolia Lam.	Anthemis americana L. f.; Anthemis occidentalis Willd; Acmella occidentalis Rich; Spilanthes mutisii Kunth; Acmella mutisii (Kunth) Cass; Ceratocephalus americanus Kuntze; Spilanthes americana Hieron; Spilanthes oppositifolia (Lam.) D’Arcy, Ann	R		R		R				R	R			R	Native
Asteroideae	Heliantheae	Acmella psilocarpa R.K. Jansen	Acmella	psilocarpa	R.K. Jansen	Syst. Bot. Monogr.	8	93		1985			R		R											Native
Asteroideae	Heliantheae	Acmella pusilla (Hook. & Arn.) R.K. Jansen	Acmella	pusilla	(Hook. & Arn.) R.K. Jansen	Syst. Bot. Monogr.	8	46		1985	Spilanthes pusilla Hook. & Arn.	Spilanthes stolonifera DC. var. pusilla (Hook. & Arn.) Baker; Spilanthes americana (L. f.) Hieron. fo. longiinternodiata A.H. Moore	R		R						R			R		Native
Asteroideae	Heliantheae	Acmella radicans (Jacq.) R.K. Jansen	Acmella	radicans	(Jacq.) R.K. Jansen	Syst. Bot. Monogr.	8	70		1985				R			R								R	Native
Asteroideae	Heliantheae	Acmella repens (Walter) Rich.	Acmella	repens	(Walter) Rich.	Syn. Pl. [Persoon]	2(2)	473		1807	Anthemis repens Walter, Acmella oppositifolia var. repens (Walter) R.K. Jansen, Ceratocephalus repens (Walter) Kuntze, Spilanthes americana var. repens (Walter) A.H. Moore, Spilanthes repens (Walter) Michx.			R			R	R	R							Native
Asteroideae	Heliantheae	Acmella serratifolia R.K. Jansen	Acmella	serratifolia	R.K. Jansen	Syst. Bot. Monogr.	8	90		1985			R		R						R			R		Native
Asteroideae	Heliantheae	Acmella sodiroi (Hieron.) R.K. Jansen	Acmella	sodiroi	(Hieron.) R.K. Jansen	Syst. Bot. Monogr.	8	44		1985	Spilanthes sodiroi Hieron.						R	R								Native
Asteroideae	Heliantheae	Acmella uliginosa (Sw.) Cass.	Acmella	uliginosa	(Sw.) Cass.	Dict. Sci. Nat. (ed. 2)	24	331		1822				R	R		R		R	R			R		R	Native	Least Concern
Asteroideae	Senecioneae	Acrisione cymosa (J. Rémy) B. Nord.	Acrisione	cymosa	(J. Rémy) B. Nord.	Bot. Jahrb. Syst.	107(1-4)	583		1985						R										Endemic
Asteroideae	Senecioneae	Acrisione denticulata (Hook. & Arn.) B. Nord.	Acrisione	denticulata	(Hook. & Arn.) B. Nord.	Bot. Jahrb. Syst.	107(1-4)	586		1985	Cacalia denticulata Hook. & Arn., Senecio denticulatus (Hook. & Arn.) DC.,	Senecio yegua (Colla) Cabrera, Senecio rancaguensis J. Rémy, Senecio ovalifolius Turcz.	R			R										Native
Asteroideae	Eupatorieae	Acritopappus buiquensis Bautista & D.J.N. Hind	Acritopappus	buiquensis	Bautista & D.J.N. Hind	Kew Bull.	64(4)	701	f. 1	2009					R											Endemic
Asteroideae	Eupatorieae	Acritopappus catolesensis D.J.N. Hind & Bautista	Acritopappus	catolesensis	D.J.N. Hind & Bautista	Kew Bull.	55(4)	950	f. 1	2000					R											Endemic
Asteroideae	Eupatorieae	Acritopappus confertus (Gardner) R.M. King & H. Rob.	Acritopappus	confertus	(Gardner) R.M. King & H. Rob.	Phytologia	24(5)	402		1972					R											Endemic	Least Concern
Asteroideae	Eupatorieae	Acritopappus connatifolius (Soar. Nunes) R.M. King & H. Rob.	Acritopappus	connatifolius	(Soar. Nunes) R.M. King & H. Rob.	Phytologia	48(3)	221		1981					R											Endemic
Asteroideae	Eupatorieae	Acritopappus diamantinicus Bautista, S. Ortiz & Rodr. Oubiña	Acritopappus	diamantinicus	Bautista, S. Ortiz & Rodr. Oubiña	Nordic J. Bot.	20(2)	173	f. 1–3	2000					R											Endemic
Asteroideae	Eupatorieae	Acritopappus harleyi R.M. King & H. Rob.	Acritopappus	harleyi	R.M. King & H. Rob.	Phytologia	38(2)	100		1977					R											Endemic	Critically Endangered
Asteroideae	Eupatorieae	Acritopappus heterolepis (Baker) R.M. King & H. Rob.	Acritopappus	heterolepis	(Baker) R.M. King & H. Rob.	Phytologia	45(2)	147		1980					R											Endemic	Least Concern
Asteroideae	Eupatorieae	Acritopappus irwinii R.M. King & H. Rob.	Acritopappus	irwinii	R.M. King & H. Rob.	Phytologia	24(5)	402		1972					R											Endemic
Asteroideae	Eupatorieae	Acritopappus jacobaeus Bautista, Rodr. Oubiña & S. Ortiz	Acritopappus	jacobaeus	Bautista, Rodr. Oubiña & S. Ortiz	Phytotaxa	311(1)	23		2017					R											Endemic
Asteroideae	Eupatorieae	Acritopappus longifolius (Gardner) R.M. King & H. Rob.	Acritopappus	longifolius	(Gardner) R.M. King & H. Rob.	Phytologia	24(5)	403		1972					R											Endemic
Asteroideae	Eupatorieae	Acritopappus micropappus (Baker) R.M. King & H. Rob.	Acritopappus	micropappus	(Baker) R.M. King & H. Rob.	Phytologia	38(2)	100		1977	Ageratum micropappum Baker				R										R	Native
Asteroideae	Eupatorieae	Acritopappus morii R.M. King & H. Rob.	Acritopappus	morii	R.M. King & H. Rob.	Phytologia	45(2)	143		1980					R											Endemic
Asteroideae	Eupatorieae	Acritopappus pereirae Bautista, S. Ortiz & Rodr. Oubiña	Acritopappus	pereirae	Bautista, S. Ortiz & Rodr. Oubiña	Syst. Bot.	36(1)	227	f. 2–3	2011					R											Endemic	Critically Endangered
Asteroideae	Eupatorieae	Acritopappus pintoi Bautista & D.J.N. Hind	Acritopappus	pintoi	Bautista & D.J.N. Hind	Kew Bull.	55(4)	951	f. 2	2000					R											Endemic	Endangered
Asteroideae	Eupatorieae	Acritopappus prunifolius R.M. King & H. Rob.	Acritopappus	prunifolius	R.M. King & H. Rob.	Phytologia	45(2)	144		1980					R											Endemic	Vulnerable
Asteroideae	Eupatorieae	Acritopappus santosii R.M. King & H. Rob.	Acritopappus	santosii	R.M. King & H. Rob.	Phytologia	45(2)	145		1980					R											Endemic
Asteroideae	Eupatorieae	Acritopappus stenophyllus Bautista, Rodr. Oubiña & S. Ortiz	Acritopappus	stenophyllus	Bautista, Rodr. Oubiña & S. Ortiz	Phytotaxa	311(1)	25		2017					R											Endemic
Asteroideae	Eupatorieae	Acritopappus subtomentosus R.M. King & H. Rob.	Acritopappus	subtomentosus	R.M. King & H. Rob.	Phytologia	45(2)	146		1980					R											Endemic	Critically Endangered
Asteroideae	Eupatorieae	Acritopappus teixeirae R.M. King & H. Rob.	Acritopappus	teixeirae	R.M. King & H. Rob.	Phytologia	45(2)	146		1980					R											Endemic
Mutisioideae	Mutisieae	Adenocaulon chilense Less.	Adenocaulon	chilense	Less.	Linnaea	6(1)	107		1831		Adenocaulon lechleri Sch. Bip., Boerhavia nudicaulis Phil.	R			R										Native
Asteroideae	Eupatorieae	Adenostemma brasilianum (Pers.) Cass.	Adenostemma	brasilianum	(Pers.) Cass.	Dict. Sci. Nat. (ed. 2)	25	363		1822	Verbesina brasiliana Pers.; Adenostemma viscosum var. brasilianum (Pers.) Benth	Adenostemma triangulare DC.; Adenostemma viscosum J.R. Forst. & G. Forst. var. triangulare (DC.) Benth; Adenostemma brasilianum (Pers.) Cass. var. triangulare (DC.) Malme	R	R	R						R			R		Native
Asteroideae	Eupatorieae	Adenostemma cuatrecasasii R.M. King & H. Rob.	Adenostemma	cuatrecasasii	R.M. King & H. Rob.	Phytologia	29(1)	5		1974							R								R	Native
Asteroideae	Eupatorieae	Adenostemma fosbergii R.M. King & H. Rob.	Adenostemma	fosbergii	R.M. King & H. Rob.	Phytologia	29(1)	7		1974					R		R	R				R				Native
Asteroideae	Eupatorieae	Adenostemma goyazense R.M. King & H. Rob.	Adenostemma	goyazense	R.M. King & H. Rob.	Phytologia	54(1)	30		1983					R											Endemic
Asteroideae	Eupatorieae	Adenostemma harlingii R.M. King & H. Rob.	Adenostemma	harlingii	R.M. King & H. Rob.	Phytologia	76(1)	14		1994								R								Endemic	Vulnerable
Asteroideae	Eupatorieae	Adenostemma involucratum R.M. King & H. Rob.	Adenostemma	involucratum	R.M. King & H. Rob.	Phytologia	29(1)	7		1974				R	R											Native
Asteroideae	Eupatorieae	Adenostemma lavenia (L.) Kuntze	Adenostemma	lavenia	(L.) Kuntze	Revis. Gen. Pl.	1	304		1891	Verbesina lavenia L.							R								Endemic
Asteroideae	Eupatorieae	Adenostemma platyphyllum Cass.	Adenostemma	platyphyllum	Cass.	Dict. Sci. Nat. (ed. 2)	25	364		1822				R	R		R	R				R			R	Native
Asteroideae	Eupatorieae	Adenostemma suffruticosum Gardner	Adenostemma	suffruticosum	Gardner	London J. Bot.	6	433		1847					R											Endemic
Asteroideae	Eupatorieae	Adenostemma vargasii R.M. King & H. Rob.	Adenostemma	vargasii	R.M. King & H. Rob.	Phytologia	54(1)	31		1983												R				Endemic
Asteroideae	Eupatorieae	Adenostemma verbesina (L.) Kuntze	Adenostemma	verbesina	(L.) Kuntze	Revis. Gen. Pl.	1	304		1891	Cotula verbesina L.	Lavenia decumbens Sw.; Adenostemma swartzii Cass	R		R						R				R	Native
Asteroideae	Eupatorieae	Adenostemma zakii R.M. King & H. Rob.	Adenostemma	zakii	R.M. King & H. Rob.	Phytologia	76(1)	15		1994								R								Endemic	Vulnerable
Asteroideae	Senecioneae	Aequatorium albiflorum (Wedd.) Cuatrec. & S. Díaz	Aequatorium	albiflorum	(Wedd.) Cuatrec. & S. Díaz	Revista Acad. Colomb. Ci. Exact.	17(67)	665		1990							R									Endemic
Asteroideae	Senecioneae	Aequatorium asterotrichum B. Nord.	Aequatorium	asterotrichum	B. Nord.	Opera Bot.	44	61		1978								R								Endemic	Endangered
Asteroideae	Senecioneae	Aequatorium cajamarcense H. Rob. & Cuatrec.	Aequatorium	cajamarcense	H. Rob. & Cuatrec.	Novon	2(4)	411		1992												R				Endemic
Asteroideae	Senecioneae	Aequatorium carpishense (Cuatrec.) H. Rob. & Cuatrec.	Aequatorium	carpishense	(Cuatrec.) H. Rob. & Cuatrec.	Novon	2(4)	412		1992												R				Endemic
Asteroideae	Senecioneae	Aequatorium caucanum S. Díaz & Cuatrec.	Aequatorium	caucanum	S. Díaz & Cuatrec.	Revista Acad. Colomb. Ci. Exact.	19(72)	248		1994							R									Endemic
Asteroideae	Senecioneae	Aequatorium jamesonii (S.F. Blake) C. Jeffrey	Aequatorium	jamesonii	(S.F. Blake) C. Jeffrey	Kew Bull.	47(1)	61		1992	Gynoxys jamesonii S.F. Blake						R	R								Native	Vulnerable
Asteroideae	Senecioneae	Aequatorium juninense H. Rob. & Cuatrec.	Aequatorium	juninense	H. Rob. & Cuatrec.	Novon	2(4)	412		1992												R				Endemic
Asteroideae	Senecioneae	Aequatorium latibracteolatum S. Díaz & Cuatrec.	Aequatorium	latibracteolatum	S. Díaz & Cuatrec.	Revista Acad. Colomb. Ci. Exact.	17(67)	663		1990							R									Endemic	Endangered
Asteroideae	Senecioneae	Aequatorium lepidotum B. Nord.	Aequatorium	lepidotum	B. Nord.	Compositae Newslett.	31	6		1997								R								Endemic	Endangered
Asteroideae	Senecioneae	Aequatorium palealbum S. Díaz & A. Correa	Aequatorium	palealbum	S. Díaz & A. Correa	Revista Acad. Colomb. Ci. Exact.	26(100)	346		2002							R									Endemic
Asteroideae	Senecioneae	Aequatorium polygonoides (Cuatrec.) B. Nord.	Aequatorium	polygonoides	(Cuatrec.) B. Nord.	Opera Bot.	44	63		1978							R									Endemic
Asteroideae	Senecioneae	Aequatorium repandiforme B. Nord.	Aequatorium	repandiforme	B. Nord.	Compositae Newslett.	31	9		1997								R								Endemic	Near Threatened
Asteroideae	Senecioneae	Aequatorium sinuatifolium S. Díaz & Cuatrec.	Aequatorium	sinuatifolium	S. Díaz & Cuatrec.	Revista Acad. Colomb. Ci. Exact.	19(73)	252		1994							R									Endemic
Asteroideae	Senecioneae	Aequatorium stellatopilosum (Greenm. & Cuatrec.) C. Jeffrey	Aequatorium	stellatopilosum	(Greenm. & Cuatrec.) C. Jeffrey	Kew Bull.	47(1)	62		1992												R				Endemic
Asteroideae	Senecioneae	Aequatorium tatamanum S. Díaz & A. Correa	Aequatorium	tatamanum	S. Díaz & A. Correa	Revista Acad. Colomb. Ci. Exact.	23(88)	332		1999							R									Endemic
Asteroideae	Senecioneae	Aequatorium tovarii H. Rob. & Cuatrec.	Aequatorium	tovarii	H. Rob. & Cuatrec.	Novon	2(4)	413		1992												R				Endemic
Asteroideae	Senecioneae	Aequatorium tuestae (Cuatrec.) H. Rob. & Cuatrec.	Aequatorium	tuestae	(Cuatrec.) H. Rob. & Cuatrec.	Novon	2(4)	413		1992												R				Endemic
Asteroideae	Senecioneae	Aequatorium venezuelanum V.M. Badillo	Aequatorium	venezuelanum	V.M. Badillo	Ernstia n.s.,	10(1)	16		2000															R	Endemic
Asteroideae	Senecioneae	Aequatorium verrucosum (Wedd.) S. Díaz & Cuatrec.	Aequatorium	verrucosum	(Wedd.) S. Díaz & Cuatrec.	Revista Acad. Colomb. Ci. Exact.	17(67)	666		1990							R									Endemic	Least Concern
Asteroideae	Senecioneae	Aetheolaena alatopetiolata (J. Calvo, E. Freire & Sklenář) Pruski	Aetheolaena	alatopetiolata	(J. Calvo, E. Freire & Sklenář) Pruski	Phytoneuron	2021–65	28		2021	Senecio alatopetiolatus J. Calvo, E. Freire & Sklenář						R	R								Native
Asteroideae	Senecioneae	Aetheolaena bentonicifolia (DC.) Pruski	Aetheolaena	bentonicifolia	(DC.) Pruski	Phytoneuron	2021–65	29		2021	Senecio betonicifolius DC.	Aetheolaena campanulata (Sch. Bip. ex Klatt) B. Nord., Aetheolaena decipiens (Benoist) B. Nord., Aetheolaena loeseneri (Hieron.) B. Nord., Lasiocephalus campanulatus (Klatt) Cuatr., Lasiocephalus decipiens (Benoist) Cuatr., Lasiocephalus loeseneri (Hieron.) Cuatr., Senecio campanulatus Sch. Bip. ex Klatt, Senecio decipiens Benoist, Senecio loeseneri Hieron.		R				R				R				Native	Endangered
Asteroideae	Senecioneae	Aetheolaena cuencana (Hieron.) B. Nord.	Aetheolaena	cuencana	(Hieron.) B. Nord.	Opera Bot.	44	54		1978	Senecio cuencanus Hieron., Lasiocephalus cuencanus (Hieron.) Cuatrec.						R	R							D	Native	Near Threatened
Asteroideae	Senecioneae	Aetheolaena doryphylla (Cuatrec.) B. Nord.	Aetheolaena	doryphylla	(Cuatrec.) B. Nord.	Opera Bot.	44	54		1978	Senecio doryphyllus Cuatrec., Lasiocephalus doryphyllus (Cuatrec.) Cuatrec.						R								R	Native
Asteroideae	Senecioneae	Aetheolaena gargantana (Cuatrec.) Pruski	Aetheolaena	gargantana	(Cuatrec.) Pruski	Phytoneuron	2021–65	30		2021	Culcitium gargantanum Cuatr., Senecio gargantanus Cuatrec., Lasiocephalus gargantanus (Cuatrec.) Cuatrec.	Culcitium karstenii Sch. Bip. ex Benoist					R									Endemic
Asteroideae	Senecioneae	Aetheolaena heterophylla (Turcz.) B. Nord.	Aetheolaena	heterophylla	(Turcz.) B. Nord.	Opera Bot.	44	54		1978	Gynoxys heterophylla Turcz.	Senecio pindilicensis Hieron., Lasiocephalus mochensis (Hieron.) Cuatrec., Aetheolaena mochensis (Hieron.) B. Nord.						R				R				Native	Endangered
Asteroideae	Senecioneae	Aetheolaena involucrata (Kunth) B. Nord.	Aetheolaena	involucrata	(Kunth) B. Nord.	Opera Bot.	44	54		1978	Senecio involucratus (Kunth) DC.	Lasiocephalus caldasensis (Cuatrec.) Cuatrec., Aetheolaena caldasensis (Cuatrec.) B. Nord.					R	R				R				Native	Least Concern
Asteroideae	Senecioneae	Aetheolaena josei (Sklenář) Pruski	Aetheolaena	josei	(Sklenář) Pruski	Phytoneuron	2021–65	32		2021	Senecio josei Sklenář							R				D				Native
Asteroideae	Senecioneae	Aetheolaena longipenicillata (Sch. Bip. ex Sandwith) B. Nord.	Aetheolaena	longipenicillata	(Sch. Bip. ex Sandwith) B. Nord.	Opera Bot.	44	54		1978	Senecio longepenicillatus Sch. Bip. ex Sandwith, Lasiocephalus longepenicillatus (Sch. Bip. ex Sandwith) Cuatrec.						R								R	Native
Asteroideae	Senecioneae	Aetheolaena mojandensis (Hieron.) B. Nord.	Aetheolaena	mojandensis	(Hieron.) B. Nord.	Opera Bot.	44	54		1978	Lasiocephalus mojandensis (Hieron.) Cuatrec., Senecio mojandensis Hieron.						R	R								Native	Near Threatened
Asteroideae	Senecioneae	Aetheolaena otophora (Wedd.) B. Nord.	Aetheolaena	otophora	(Wedd.) B. Nord.	Opera Bot.	44	56		1978	Senecio otophorus Wedd., Lasiocephalus otophorus (Wedd.) Cuatrec.	Lasiocephalus yacuanquensis (Cuatrec.) Cuatrec.					R	R							D	Native
Asteroideae	Senecioneae	Aetheolaena patens (Kunth) B. Nord.	Aetheolaena	patens	(Kunth) B. Nord.	Opera Bot.	44	54		1978	Cacalia patens Kunth, Lasiocephalus patens (Kunth) Cuatrec., Senecio patens (Kunth) DC.						R	R				R			R	Native
Asteroideae	Senecioneae	Aetheolaena piedrahitae (J. Calvo & F. Ávila) Pruski	Aetheolaena	piedrahitae	(J. Calvo & F. Ávila) Pruski	Phytoneuron	2021–65	34		2021	Senecio piedrahitae J. Calvo & F. Ávila						R									Endemic
Asteroideae	Senecioneae	Aetheolaena puracensis (Cuatrec.) B. Nord.	Aetheolaena	puracensis	(Cuatrec.) B. Nord.	Opera Bot.	44	54		1978	Senecio puracensis Cuatrec., Lasiocephalus puracensis (Cuatrec.) Cuatrec.						R									Endemic
Asteroideae	Senecioneae	Aetheolaena subinvolucrata (Cuatrec.) B. Nord.	Aetheolaena	subinvolucrata	(Cuatrec.) B. Nord.	Opera Bot.	44	56		1978	Senecio subinvolucratus Cuatrec., Lasiocephalus subinvolucratus (Cuatrec.) Cuatrec.						R	R								Native	Endangered
Asteroideae	Eupatorieae	Ageratina acevedoi H. Rob.	Ageratina	acevedoi	H. Rob.	Phytologia	88(2)	174		2006				R												Endemic
Asteroideae	Eupatorieae	Ageratina adenophora (Spreng.) R.M. King & H. Rob.	Ageratina	adenophora	(Spreng.) R.M. King & H. Rob.	Phytologia	19(4)	211		1970												R				Endemic
Asteroideae	Eupatorieae	Ageratina ampla (Benth.) R.M. King & H. Rob.	Ageratina	ampla	(Benth.) R.M. King & H. Rob.	Phytologia	19(4)	219		1970							R									Endemic	Least Concern
Asteroideae	Eupatorieae	Ageratina angustifolia (Kunth) R.M. King & H. Rob.	Ageratina	angustifolia	(Kunth) R.M. King & H. Rob.	Phytologia	19(4)	219		1970							R									Endemic
Asteroideae	Eupatorieae	Ageratina apollinairei (B.L. Rob.) R.M. King & H. Rob.	Ageratina	apollinairei	(B.L. Rob.) R.M. King & H. Rob.	Phytologia	19(4)	212		1970							R									Endemic
Asteroideae	Eupatorieae	Ageratina appendiculata V.M. Badillo	Ageratina	appendiculata	V.M. Badillo	Ernstia n.s.,	10(1)	7	f. 3	2000															D	Endemic
Asteroideae	Eupatorieae	Ageratina aracaiensis V.M. Badillo	Ageratina	aracaiensis	V.M. Badillo	Ernstia n.s.,	10(1)	8		2000															R	Endemic
Asteroideae	Eupatorieae	Ageratina arbutifolia (Benth.) R.M. King & H. Rob.	Ageratina	arbutifolia	(Benth.) R.M. King & H. Rob.	Phytologia	19(4)	219		1970							R									Endemic
Asteroideae	Eupatorieae	Ageratina aristeguietii R.M. King & H. Rob.	Ageratina	aristeguietii	R.M. King & H. Rob.	Phytologia	35(6)	497	f.	1977															R	Endemic
Asteroideae	Eupatorieae	Ageratina aristei (B.L. Rob.) R.M. King & H. Rob.	Ageratina	aristei	(B.L. Rob.) R.M. King & H. Rob.	Phytologia	19(4)	219		1970							R									Endemic
Asteroideae	Eupatorieae	Ageratina asclepiadea (L. f.) R.M. King & H. Rob.	Ageratina	asclepiadea	(L. f.) R.M. King & H. Rob.	Phytologia	60(1)	80		1986							R									Endemic	Least Concern
Asteroideae	Eupatorieae	Ageratina azangaroensis (Sch. Bip. ex Wedd.) R.M. King & H. Rob.	Ageratina	azangaroensis	(Sch. Bip. ex Wedd.) R.M. King & H. Rob.	Phytologia	19(4)	212		1970	Eupatorium azangaroense Sch. Bip. ex Wedd.						R	R				R				Native
Asteroideae	Eupatorieae	Ageratina azangaroënsis (Sch. Bip. ex Wedd.) R.M. King & H. Rob.	Ageratina	azangaroënsis	(Sch. Bip. ex Wedd.) R.M. King & H. Rob.	Phytologia	19(4)	212		1970	Eupatorium azangaroense Sch. Bip. ex Wedd.	Eupatorium prasiifolium Griseb. var. glanduliferum R.E. Fr	R													Endemic
Asteroideae	Eupatorieae	Ageratina baccharoides (Kunth) R.M. King & H. Rob.	Ageratina	baccharoides	(Kunth) R.M. King & H. Rob.	Phytologia	19(4)	219		1970							R									Endemic
Asteroideae	Eupatorieae	Ageratina barclayae R.M. King & H. Rob.	Ageratina	barclayae	R.M. King & H. Rob.	Phytologia	54(1)	38		1983							R									Endemic
Asteroideae	Eupatorieae	Ageratina bishopii R.M. King & H. Rob.	Ageratina	bishopii	R.M. King & H. Rob.	Phytologia	54(1)	37		1983												R				Endemic
Asteroideae	Eupatorieae	Ageratina boekei R.M. King & H. Rob.	Ageratina	boekei	R.M. King & H. Rob.	Phytologia	54(1)	39		1983												R				Endemic
Asteroideae	Eupatorieae	Ageratina boyacensis R.M. King & H. Rob.	Ageratina	boyacensis	R.M. King & H. Rob.	Phytologia	24(2)	84		1972							R									Endemic
Asteroideae	Eupatorieae	Ageratina capazica V.M. Badillo	Ageratina	capazica	V.M. Badillo	Ernstia n.s.,	10(1)	9		2000															R	Endemic
Asteroideae	Eupatorieae	Ageratina chachapoyasensis (Cuatrec.) R.M. King & H. Rob.	Ageratina	chachapoyasensis	(Cuatrec.) R.M. King & H. Rob.	Phytologia	19(4)	220		1970												R				Endemic
Asteroideae	Eupatorieae	Ageratina choricephaloides (B.L. Rob.) R.M. King & H. Rob.	Ageratina	choricephaloides	(B.L. Rob.) R.M. King & H. Rob.	Phytologia	19(4)	213		1970	Eupatorium choricephaloides B.L. Rob.							R				R				Native
Asteroideae	Eupatorieae	Ageratina crassiceps (B.L. Rob.) R.M. King & H. Rob.	Ageratina	crassiceps	(B.L. Rob.) R.M. King & H. Rob.	Phytologia	19(4)	220		1970							R									Endemic
Asteroideae	Eupatorieae	Ageratina cuatrecasasii R.M. King & H. Rob.	Ageratina	cuatrecasasii	R.M. King & H. Rob.	Phytologia	24(2)	88		1972							R								R	Native
Asteroideae	Eupatorieae	Ageratina cuencana (B.L. Rob.) R.M. King & H. Rob.	Ageratina	cuencana	(B.L. Rob.) R.M. King & H. Rob.	Phytologia	19(4)	213		1970	Eupatorium cuencanum B.L. Rob.							R				R				Native	Vulnerable
Asteroideae	Eupatorieae	Ageratina cutervensis (Hieron.) R.M. King & H. Rob.	Ageratina	cutervensis	(Hieron.) R.M. King & H. Rob.	Phytologia	19(4)	213		1970	Eupatorium cutervense Hieron.							R				R				Native
Asteroideae	Eupatorieae	Ageratina cuzcoensis (Hieron.) R.M. King & H. Rob.	Ageratina	cuzcoensis	(Hieron.) R.M. King & H. Rob.	Phytologia	19(4)	220		1970												R				Endemic
Asteroideae	Eupatorieae	Ageratina dasyneura (B.L. Rob.) R.M. King & H. Rob.	Ageratina	dasyneura	(B.L. Rob.) R.M. King & H. Rob.	Phytologia	19(4)	213		1970							R									Endemic
Asteroideae	Eupatorieae	Ageratina davidsei R.M. King & H. Rob.	Ageratina	davidsei	R.M. King & H. Rob.	Phytologia	38(4)	328		1978							R									Endemic
Asteroideae	Eupatorieae	Ageratina dendroides (Spreng.) R.M. King & H. Rob.	Ageratina	dendroides	(Spreng.) R.M. King & H. Rob.	Phytologia	19(4)	221		1970	Eupatorium dendroides Spreng.							R								Endemic	Vulnerable
Asteroideae	Eupatorieae	Ageratina dillonii H. Rob.	Ageratina	dillonii	H. Rob.	Phytologia	88(2)	171		2006												R				Endemic
Asteroideae	Eupatorieae	Ageratina dombeyana (DC.) R.M. King & H. Rob.	Ageratina	dombeyana	(DC.) R.M. King & H. Rob.	Phytologia	19(4)	221		1970												R				Endemic
Asteroideae	Eupatorieae	Ageratina elegans (Kunth) R.M. King & H. Rob.	Ageratina	elegans	(Kunth) R.M. King & H. Rob.	Phytologia	19(4)	221		1970							R					R				Native
Asteroideae	Eupatorieae	Ageratina exsertovenosa (Klatt) R.M. King & H. Rob.	Ageratina	exsertovenosa	(Klatt) R.M. King & H. Rob.	Phytologia	19(4)	221		1970												R				Endemic
Asteroideae	Eupatorieae	Ageratina fastigiata (Kunth) R.M. King & H. Rob.	Ageratina	fastigiata	(Kunth) R.M. King & H. Rob.	Phytologia	19(4)	221		1970	Eupatorium fastigiatum Kunth	Ageratina exserto-venosa (Klatt) R.M. King & H. Rob.					R	R				R				Native
Asteroideae	Eupatorieae	Ageratina flaviseta (B.L. Rob.) R.M. King & H. Rob.	Ageratina	flaviseta	(B.L. Rob.) R.M. King & H. Rob.	Phytologia	19(4)	221		1970							R									Endemic
Asteroideae	Eupatorieae	Ageratina fleischmannioides H. Rob.	Ageratina	fleischmannioides	H. Rob.	Phytologia	88(2)	168		2006							R									Endemic
Asteroideae	Eupatorieae	Ageratina funckii (B.L. Rob.) R.M. King & H. Rob.	Ageratina	funckii	(B.L. Rob.) R.M. King & H. Rob.	Phytologia	19(4)	214		1970							R									Endemic
Asteroideae	Eupatorieae	Ageratina gilbertii (B.L. Rob.) R.M. King & H. Rob.	Ageratina	gilbertii	(B.L. Rob.) R.M. King & H. Rob.	Phytologia	19(4)	214		1970												R				Endemic
Asteroideae	Eupatorieae	Ageratina glandulifera (Hieron.) R.M. King & H. Rob.	Ageratina	glandulifera	(Hieron.) R.M. King & H. Rob.	Phytologia	19(4)	214		1970	Eupatorium glanduliferum Hieron.							R								Endemic
Asteroideae	Eupatorieae	Ageratina glechonophylla (Less.) R.M. King & H. Rob.	Ageratina	glechonophylla	(Less.) R.M. King & H. Rob.	Phytologia	19(4)	214		1970	Eupatorium glechonophyllum Less., Kyrstenia glechonophylla (Less.) Greene			R		R		R				R				Native
Asteroideae	Eupatorieae	Ageratina gloeoclada (B.L. Rob.) R.M. King & H. Rob.	Ageratina	gloeoclada	(B.L. Rob.) R.M. King & H. Rob.	Phytologia	19(4)	222		1970				R								R				Native
Asteroideae	Eupatorieae	Ageratina glyptophlebia (B.L. Rob.) R.M. King & H. Rob.	Ageratina	glyptophlebia	(B.L. Rob.) R.M. King & H. Rob.	Phytologia	19(4)	222		1970	Eupatorium glyptophlebium B.L. Rob.						R	R								Native
Asteroideae	Eupatorieae	Ageratina gracilenta (B.L. Rob.) R.M. King & H. Rob.	Ageratina	gracilenta	(B.L. Rob.) R.M. King & H. Rob.	Phytologia	19(4)	214		1970												R				Endemic
Asteroideae	Eupatorieae	Ageratina gracilis (Kunth) R.M. King & H. Rob.	Ageratina	gracilis	(Kunth) R.M. King & H. Rob.	Phytologia	19(4)	214		1970	Eupatorium gracile Kunth						R	R							R	Native	Least Concern
Asteroideae	Eupatorieae	Ageratina gynoxoides (Wedd.) R.M. King & H. Rob.	Ageratina	gynoxoides	(Wedd.) R.M. King & H. Rob.	Phytologia	19(4)	222		1970							R									Endemic
Asteroideae	Eupatorieae	Ageratina ibaguensis (Sch. Bip. ex Hieron.) R.M. King & H. Rob.	Ageratina	ibaguensis	(Sch. Bip. ex Hieron.) R.M. King & H. Rob.	Phytologia	19(4)	214		1970							R								R	Native
Asteroideae	Eupatorieae	Ageratina infiernillensis R.M. King & H. Rob.	Ageratina	infiernillensis	R.M. King & H. Rob.	Phytologia	24(2)	91		1972												R				Endemic
Asteroideae	Eupatorieae	Ageratina intercostulata (B.L. Rob.) R.M. King & H. Rob.	Ageratina	intercostulata	(B.L. Rob.) R.M. King & H. Rob.	Phytologia	19(4)	223		1970							R									Endemic
Asteroideae	Eupatorieae	Ageratina jahnii (B.L. Rob.) R.M. King & H. Rob.	Ageratina	jahnii	(B.L. Rob.) R.M. King & H. Rob.	Phytologia	19(4)	223		1970															R	Endemic
Asteroideae	Eupatorieae	Ageratina josephensis Rodr.-Cabeza & S. Díaz	Ageratina	josephensis	Rodr.-Cabeza & S. Díaz	Revista Acad. Colomb. Ci. Exact.	36(141)	507		2012							R									Endemic
Asteroideae	Eupatorieae	Ageratina killipii H. Rob.	Ageratina	killipii	H. Rob.	Phytologia	88(2)	160		2006							R									Endemic
Asteroideae	Eupatorieae	Ageratina latipes (Benth.) R.M. King & H. Rob.	Ageratina	latipes	(Benth.) R.M. King & H. Rob.	Phytologia	37(5)	455		1977							R									Endemic	Near Threatened
Asteroideae	Eupatorieae	Ageratina lobulifera (B.L. Rob.) R.M. King & H. Rob.	Ageratina	lobulifera	(B.L. Rob.) R.M. King & H. Rob.	Phytologia	19(4)	214		1970												R				Endemic
Asteroideae	Eupatorieae	Ageratina lopezmirandae R.M. King & H. Rob.	Ageratina	lopezmirandae	R.M. King & H. Rob.	Phytologia	38(4)	331		1978												R				Endemic
Asteroideae	Eupatorieae	Ageratina lorentzii (Hieron.) R.M. King & H. Rob.	Ageratina	lorentzii	(Hieron.) R.M. King & H. Rob.	Phytologia	19(4)	215		1970	Eupatorium lorentzii Hieron.		R	R												Native
Asteroideae	Eupatorieae	Ageratina macbridei (B.L. Rob.) R.M. King & H. Rob.	Ageratina	macbridei	(B.L. Rob.) R.M. King & H. Rob.	Phytologia	19(4)	224		1970	Eupatorium macbridei B.L. Rob.							R				R				Native	Lower Risk/least concern
Asteroideae	Eupatorieae	Ageratina mutiscuensis (B.L. Rob.) R.M. King & H. Rob.	Ageratina	mutiscuensis	(B.L. Rob.) R.M. King & H. Rob.	Phytologia	24(2)	94		1972							R									Endemic
Asteroideae	Eupatorieae	Ageratina neblinensis J. Montoya, E. Linares, Torres Marq., Vicente Orell. & A. Galán	Ageratina	neblinensis	J. Montoya, E. Linares, Torres Marq., Vicente Orell. & A. Galán	Gayana, Bot.	74(2)	288		2017												R				Endemic
Asteroideae	Eupatorieae	Ageratina neriifolia (B.L. Rob.) R.M. King & H. Rob.	Ageratina	neriifolia	(B.L. Rob.) R.M. King & H. Rob.	Phytologia	19(4)	224		1970		Ageratina dorii V.M. Badillo													R	Endemic
Asteroideae	Eupatorieae	Ageratina ocanensis (B.L. Rob.) R.M. King & H. Rob.	Ageratina	ocanensis	(B.L. Rob.) R.M. King & H. Rob.	Phytologia	19(4)	224		1970							R									Endemic
Asteroideae	Eupatorieae	Ageratina pampalcensis (B.L. Rob.) R.M. King & H. Rob.	Ageratina	pampalcensis	(B.L. Rob.) R.M. King & H. Rob.	Phytologia	19(4)	215		1970												R				Endemic
Asteroideae	Eupatorieae	Ageratina paramensis (Aristeg.) R.M. King & H. Rob.	Ageratina	paramensis	(Aristeg.) R.M. King & H. Rob.	Phytologia	19(4)	224		1970															R	Endemic	Critically Endangered
Asteroideae	Eupatorieae	Ageratina pentlandiana (DC.) R.M. King & H. Rob.	Ageratina	pentlandiana	(DC.) R.M. King & H. Rob.	Phytologia	19(4)	225		1970				R								R				Native
Asteroideae	Eupatorieae	Ageratina persetosa H. Rob.	Ageratina	persetosa	H. Rob.	Phytologia	88(2)	155		2006							R									Endemic
Asteroideae	Eupatorieae	Ageratina pichinchensis (Kunth) R.M. King & H. Rob.	Ageratina	pichinchensis	(Kunth) R.M. King & H. Rob.	Phytologia	19(4)	215		1970	Eupatorium pichinchense Kunth	Ageratina articulata (Sch. Bip. ex Hieron.) R.M. King & H. Rob.					R	R				R			R	Native
Asteroideae	Eupatorieae	Ageratina piurae (B.L. Rob.) R.M. King & H. Rob.	Ageratina	piurae	(B.L. Rob.) R.M. King & H. Rob.	Phytologia	19(4)	225		1970												R				Endemic
Asteroideae	Eupatorieae	Ageratina popayanensis (Hieron.) R.M. King & H. Rob.	Ageratina	popayanensis	(Hieron.) R.M. King & H. Rob.	Phytologia	19(4)	225		1970							R									Endemic
Asteroideae	Eupatorieae	Ageratina proba (N.E. Br.) R.M. King & H. Rob.	Ageratina	proba	(N.E. Br.) R.M. King & H. Rob.	Phytologia	37(5)	455		1977												R				Endemic
Asteroideae	Eupatorieae	Ageratina prunellifolia (Kunth) R.M. King & H. Rob.	Ageratina	prunellifolia	(Kunth) R.M. King & H. Rob.	Phytologia	19(4)	215		1970	Eupatorium prunellifolium Kunth							R				R				Native
Asteroideae	Eupatorieae	Ageratina prunifolia (Kunth) R.M. King & H. Rob.	Ageratina	prunifolia	(Kunth) R.M. King & H. Rob.	Phytologia	19(4)	225		1970	Eupatorium prunifolium Kunth							R								Endemic
Asteroideae	Eupatorieae	Ageratina pseudochilca (Benth.) R.M. King & H. Rob.	Ageratina	pseudochilca	(Benth.) R.M. King & H. Rob.	Phytologia	19(4)	225		1970	Eupatorium pseudochilca Benth.						R	R								Native
Asteroideae	Eupatorieae	Ageratina psilodora (B.L. Rob.) R.M. King & H. Rob.	Ageratina	psilodora	(B.L. Rob.) R.M. King & H. Rob.	Phytologia	19(4)	216		1970							R									Endemic
Asteroideae	Eupatorieae	Ageratina rangelii H. Rob.	Ageratina	rangelii	H. Rob.	Phytologia	88(2)	158		2006							R									Endemic
Asteroideae	Eupatorieae	Ageratina rhodopappa (B.L. Rob.) R.M. King & H. Rob.	Ageratina	rhodopappa	(B.L. Rob.) R.M. King & H. Rob.	Phytologia	19(4)	216		1970	Eupatorium rhodopappum B.L. Rob.						R	R								Native
Asteroideae	Eupatorieae	Ageratina rhypodes (B.L. Rob.) R.M. King & H. Rob.	Ageratina	rhypodes	(B.L. Rob.) R.M. King & H. Rob.	Phytologia	19(4)	216		1970	Eupatorium rhypodes B.L. Rob.							R								Endemic	Near Threatened
Asteroideae	Eupatorieae	Ageratina rhytidodes (B.L. Rob.) R.M. King & H. Rob.	Ageratina	rhytidodes	(B.L. Rob.) R.M. King & H. Rob.	Phytologia	19(4)	216		1970												R				Endemic
Asteroideae	Eupatorieae	Ageratina riparia (Regel) R.M. King & H. Rob.	Ageratina	riparia	(Regel) R.M. King & H. Rob.	Phytologia	19(4)	216		1970												R				Endemic
Asteroideae	Eupatorieae	Ageratina roraimensis (N.E. Br.) R.M. King & H. Rob.	Ageratina	roraimensis	(N.E. Br.) R.M. King & H. Rob.	Phytologia	19(4)	216		1970										R					R	Native
Asteroideae	Eupatorieae	Ageratina scopulorum (Wedd.) R.M. King & H. Rob.	Ageratina	scopulorum	(Wedd.) R.M. King & H. Rob.	Phytologia	19(4)	217		1970				R								R				Native
Asteroideae	Eupatorieae	Ageratina simulans (B.L. Rob.) R.M. King & H. Rob.	Ageratina	simulans	(B.L. Rob.) R.M. King & H. Rob.	Phytologia	19(4)	226		1970												R				Endemic
Asteroideae	Eupatorieae	Ageratina sodiroi (Hieron.) R.M. King & H. Rob.	Ageratina	sodiroi	(Hieron.) R.M. King & H. Rob.	Phytologia	19(4)	217		1970	Eupatorium sodiroi Hieron.							R				R				Native	Least Concern
Asteroideae	Eupatorieae	Ageratina sotarensis (Hieron.) R.M. King & H. Rob.	Ageratina	sotarensis	(Hieron.) R.M. King & H. Rob.	Phytologia	19(4)	217		1970							R									Endemic
Asteroideae	Eupatorieae	Ageratina sternbergiana (DC.) R.M. King & H. Rob.	Ageratina	sternbergiana	(DC.) R.M. King & H. Rob.	Phytologia	19(4)	217		1970				R								R				Native
Asteroideae	Eupatorieae	Ageratina stictophylla (B.L. Rob.) R.M. King & H. Rob.	Ageratina	stictophylla	(B.L. Rob.) R.M. King & H. Rob.	Phytologia	19(4)	226		1970												R				Endemic
Asteroideae	Eupatorieae	Ageratina subferruginea (B.L. Rob.) R.M. King & H. Rob.	Ageratina	subferruginea	(B.L. Rob.) R.M. King & H. Rob.	Phytologia	19(4)	226		1970												R				Endemic
Asteroideae	Eupatorieae	Ageratina tambillensis (Hieron.) R.M. King & H. Rob.	Ageratina	tambillensis	(Hieron.) R.M. King & H. Rob.	Phytologia	19(4)	217		1970	Eupatorium tambillense Hieron.							R				R				Native
Asteroideae	Eupatorieae	Ageratina tarmensis (B.L. Rob.) R.M. King & H. Rob.	Ageratina	tarmensis	(B.L. Rob.) R.M. King & H. Rob.	Phytologia	19(4)	217		1970												R				Endemic
Asteroideae	Eupatorieae	Ageratina tenuis (R.E. Fr.) R.M. King & H. Rob.	Ageratina	tenuis	(R.E. Fr.) R.M. King & H. Rob.	Phytologia	19(4)	217		1970	Eupatorium tenue R.E. Fr.		R	R												Native
Asteroideae	Eupatorieae	Ageratina theifolia (Benth.) R.M. King & H. Rob.	Ageratina	theifolia	(Benth.) R.M. King & H. Rob.	Phytologia	19(4)	227		1970							R								R	Native
Asteroideae	Eupatorieae	Ageratina tinifolia (Kunth) R.M. King & H. Rob.	Ageratina	tinifolia	(Kunth) R.M. King & H. Rob.	Phytologia	19(4)	227		1970	Eupatorium tinifolium Kunth						R	R							R	Native
Asteroideae	Eupatorieae	Ageratina tovarae H. Rob.	Ageratina	tovarae	H. Rob.	Phytologia	93(1)	95		2011												R				Endemic
Asteroideae	Eupatorieae	Ageratina trianae H. Rob.	Ageratina	trianae	H. Rob.	Phytologia	88(2)	163		2006							R									Endemic
Asteroideae	Eupatorieae	Ageratina vacciniifolia (Benth.) R.M. King & H. Rob.	Ageratina	vacciniifolia	(Benth.) R.M. King & H. Rob.	Phytologia	19(4)	227		1970							R									Endemic
Asteroideae	Eupatorieae	Ageratina vallincola (DC.) R.M. King & H. Rob.	Ageratina	vallincola	(DC.) R.M. King & H. Rob.	Phytologia	19(4)	217		1970												R				Endemic
Asteroideae	Eupatorieae	Ageratina viscosa (Kunth) R.M. King & H. Rob.	Ageratina	viscosa	(Kunth) R.M. King & H. Rob.	Phytologia	19(4)	228		1970	Eupatorium viscosum Kunth						R	R								Native
Asteroideae	Eupatorieae	Ageratina wurdackii R.M. King & H. Rob.	Ageratina	wurdackii	R.M. King & H. Rob.	Phytologia	38(4)	332		1978												R				Endemic
Asteroideae	Eupatorieae	Ageratina zinniifolia (B.L. Rob.) R.M. King & H. Rob.	Ageratina	zinniifolia	(B.L. Rob.) R.M. King & H. Rob.	Phytologia	19(4)	218		1970							R									Endemic
Asteroideae	Eupatorieae	Ageratum ballotifolium (Maguire, Steyerm. & Wurdack) R.M. King & H. Rob.	Ageratum	ballotifolium	(Maguire, Steyerm. & Wurdack) R.M. King & H. Rob.	Phytologia	24(2)	113		1972															R	Endemic
Asteroideae	Eupatorieae	Ageratum candidum G.M. Barroso	Ageratum	candidum	G.M. Barroso	Sellowia	17	83		1965					R											Endemic
Asteroideae	Eupatorieae	Ageratum fastigiatum (Gardner) R.M. King & H. Rob.	Ageratum	fastigiatum	(Gardner) R.M. King & H. Rob.	Phytologia	24(2)	114		1972				R	R											Native
Asteroideae	Eupatorieae	Ageratum iltisii R.M. King & H. Rob.	Ageratum	iltisii	R.M. King & H. Rob.	Phytologia	27(6)	387		1974								R								Endemic	Vulnerable
Asteroideae	Eupatorieae	Ageratum microcarpum (Benth.) Hemsl.	Ageratum	microcarpum	(Benth.) Hemsl.	Biol. Cent.-Amer., Bot.	2	82		1881							R								R	Native
Asteroideae	Eupatorieae	Ageratum myriadenium (Sch. Bip. ex Baker) R.M. King & H. Rob.	Ageratum	myriadenium	(Sch. Bip. ex Baker) R.M. King & H. Rob.	Phytologia	24(2)	115		1972					R											Endemic
Asteroideae	Eupatorieae	Ageratum scorpioideum Baker	Ageratum	scorpioideum	Baker	Fl. Bras.	6(2)	197		1876										R					R	Native
Cichorioideae	Cichorieae	Agoseris chilensis (Less.) Greene	Agoseris	chilensis	(Less.) Greene	Pittonia	2(10)	178		1891						R										Endemic
Cichorioideae	Cichorieae	Agoseris coronopifolia (d'Urv.) K.L. Chambers	Agoseris	coronopifolia	(d'Urv.) K.L. Chambers	Sci. Rep. Brit. Antarc. Surv.	60	137		1968	Taraxacum coronopifolium d’Urv., Troximon coronopifolius (d’Urv.) Cabrera	Taraxacum pumilum Gaudich., Macrorhynchus pumilus (Gaudich.) DC., Macrorhynchus poeppigii DC., Agoseris poeppigii (DC.) Greene, Troximon poeppigii (DC.) Wild., Macrorhynchus australis Phil., Agoseris australis (Phil.) Macloskie, Macrorhynchus elatus Phil.	R			R										Native
Asteroideae	Eupatorieae	Agrianthus almasensis D.J.N. Hind	Agrianthus	almasensis	D.J.N. Hind	Kew Bull.	48(2)	266	f. 8	1993					R											Endemic
Asteroideae	Eupatorieae	Agrianthus campestris Mart. ex DC.	Agrianthus	campestris	Mart. ex DC.	Prodr. [A. P. de Candolle]	5	125		1836					R											Endemic
Asteroideae	Eupatorieae	Agrianthus carvalhoi D.J.N. Hind	Agrianthus	carvalhoi	D.J.N. Hind	Kew Bull.	64(2)	291		2009					R											Endemic
Asteroideae	Eupatorieae	Agrianthus empetrifolius Mart. ex DC.	Agrianthus	empetrifolius	Mart. ex DC.	Prodr. [A. P. de Candolle]	5	126		1836					R											Endemic
Asteroideae	Eupatorieae	Agrianthus giuliettiae D.J.N. Hind	Agrianthus	giuliettiae	D.J.N. Hind	Kew Bull.	48(2)	269	f. 9	1993					R											Endemic
Asteroideae	Eupatorieae	Agrianthus luetzelburgii Mattf.	Agrianthus	luetzelburgii	Mattf.	Notizbl. Bot. Gart. Berlin-Dahlem	8(76)	441		1923					R											Endemic
Asteroideae	Eupatorieae	Agrianthus microlicioides Mattf.	Agrianthus	microlicioides	Mattf.	Notizbl. Bot. Gart. Berlin-Dahlem	8(76)	442		1923					R											Endemic
Asteroideae	Eupatorieae	Agrianthus myrtoides Mattf.	Agrianthus	myrtoides	Mattf.	Notizbl. Bot. Gart. Berlin-Dahlem	8(76)	444		1923					R											Endemic
Asteroideae	Eupatorieae	Agrianthus pungens Mattf.	Agrianthus	pungens	Mattf.	Notizbl. Bot. Gart. Berlin-Dahlem	8(76)	443		1923					R											Endemic
Vernonioideae	Vernonieae	Albertinia brasiliensis Spreng.	Albertinia	brasiliensis	Spreng.	Syst. Veg. [Sprengel]	3	434		1826					R											Endemic
Asteroideae	Heliantheae	Aldama amphichlora (S.F. Blake) E.E. Schill.	Aldama	amphichlora	(S.F. Blake) E.E. Schill.	Bot. J. Linn. Soc.	167(3)	322		2011					R						R					Native
Asteroideae	Heliantheae	Aldama anchusifolia (DC.) E.E. Schill. & Panero	Aldama	anchusifolia	(DC.) E.E. Schill. & Panero	Bot. J. Linn. Soc.	167(3)	322		2011	Leighia anchusifolia DC; Viguiera anchusifolia (DC.) Baker; Rhysolepis anchusifolia (DC.) H. Rob. & A.J. Moore		R		R									R		Native
Asteroideae	Heliantheae	Aldama arenaria (Baker) E.E. Schill. & Panero	Aldama	arenaria	(Baker) E.E. Schill. & Panero	Bot. J. Linn. Soc.	167(3)	322		2011					R											Endemic
Asteroideae	Heliantheae	Aldama aspilioides (Baker) E.E. Schill. & Panero	Aldama	aspilioides	(Baker) E.E. Schill. & Panero	Bot. J. Linn. Soc.	167(3)	322		2011					R											Endemic
Asteroideae	Heliantheae	Aldama atacamensis (Phil.) E.E. Schill. & Panero	Aldama	atacamensis	(Phil.) E.E. Schill. & Panero	Bot. J. Linn. Soc.	167(3)	322		2011						R										Endemic
Asteroideae	Heliantheae	Aldama bakeriana (S.F. Blake) E.E. Schill. & Panero	Aldama	bakeriana	(S.F. Blake) E.E. Schill. & Panero	Bot. J. Linn. Soc.	167(3)	322		2011					R											Endemic
Asteroideae	Heliantheae	Aldama bracteata (Gardner) E.E. Schill. & Panero	Aldama	bracteata	(Gardner) E.E. Schill. & Panero	Bot. J. Linn. Soc.	167(3)	322		2011					R											Endemic
Asteroideae	Heliantheae	Aldama breviflosculosa (S.F. Blake) E.E. Schill. & Panero	Aldama	breviflosculosa	(S.F. Blake) E.E. Schill. & Panero	Bot. J. Linn. Soc.	167(3)	322		2011														R		Endemic
Asteroideae	Heliantheae	Aldama corumbensis (Malme) Magenta & Pirani	Aldama	corumbensis	(Malme) Magenta & Pirani	Rodriguésia	65(1)	177		2014					R											Endemic
Asteroideae	Heliantheae	Aldama densifolia (Baker) E.E. Schill. & Panero	Aldama	densifolia	(Baker) E.E. Schill. & Panero	Bot. J. Linn. Soc.	167(3)	322		2011											R					Endemic
Asteroideae	Heliantheae	Aldama dentata La Llave	Aldama	dentata	La Llave	Nov. Veg. Descr.	1	14		1824															R	Endemic
Asteroideae	Heliantheae	Aldama discolor (Baker) E.E. Schill. & Panero	Aldama	discolor	(Baker) E.E. Schill. & Panero	Bot. J. Linn. Soc.	167(3)	322		2011					R											Endemic
Asteroideae	Heliantheae	Aldama fabrisii (A.A. Sáenz) E.E. Schill. & Panero	Aldama	fabrisii	(A.A. Sáenz) E.E. Schill. & Panero	Bot. J. Linn. Soc.	167(3)	323		2011	Viguiera fabrisii A.A. Sáenz; Rhysolepis fabrisii (A.A. Sáenz) H. Rob. & A.J. Moore		R													Endemic
Asteroideae	Heliantheae	Aldama filifolia (Sch. Bip. ex Baker) E.E. Schill. & Panero	Aldama	filifolia	(Sch. Bip. ex Baker) E.E. Schill. & Panero	Bot. J. Linn. Soc.	167(3)	323		2011					R						R					Native
Asteroideae	Heliantheae	Aldama gardneri (Baker) E.E. Schill. & Panero	Aldama	gardneri	(Baker) E.E. Schill. & Panero	Bot. J. Linn. Soc.	167(3)	323		2011					R											Endemic
Asteroideae	Heliantheae	Aldama gilliesii (Hook. & Arn.) E.E. Schill. & Panero	Aldama	gilliesii	(Hook. & Arn.) E.E. Schill. & Panero	Bot. J. Linn. Soc.	167(3)	323		2011	Leighia gilliesii Hook. & Arn; Viguiera gilliesii (Hook. & Arn.) Hieron; Rhysolepis gilliesii (Hook. & Arn.) H. Rob. & A.J. Moore	Helianthus heteropappus Gillies ex Hook. & Arn; Flourensia hispidula Phil.	R													Endemic
Asteroideae	Heliantheae	Aldama goyasensis (H. Rob. & A.J. Moore) E.E. Schill. & Panero	Aldama	goyasensis	(H. Rob. & A.J. Moore) E.E. Schill. & Panero	Bot. J. Linn. Soc.	167(3)	323		2011					R											Endemic
Asteroideae	Heliantheae	Aldama goyazii E.E. Schill. & Panero	Aldama	goyazii	E.E. Schill. & Panero	Bot. J. Linn. Soc.	167(3)	323		2011					R											Endemic
Asteroideae	Heliantheae	Aldama grandiflora (Gardner) E.E. Schill. & Panero	Aldama	grandiflora	(Gardner) E.E. Schill. & Panero	Bot. J. Linn. Soc.	167(3)	323		2011					R											Endemic
Asteroideae	Heliantheae	Aldama helianthoides (Rich.) E.E. Schill. & Panero	Aldama	helianthoides	(Rich.) E.E. Schill. & Panero	Bot. J. Linn. Soc.	167(3)	323		2011	Sanvitalia helianthoides Rich.; Rhysolepis helianthoides (Rich.) H. Rob. & A.J. Moore	Helianthus procumbens Pers; Helianthus atacamensis Phil; Flourensia atacamensis (Phil.) Reiche; Viguiera pazensis Rusby; Viguiera pflanzii Perkins	R			R										Native
Asteroideae	Heliantheae	Aldama knobiana (Mondin & Magenta) E.E. Schill. & Panero	Aldama	knobiana	(Mondin & Magenta) E.E. Schill. & Panero	Bot. J. Linn. Soc.	167(3)	323		2011					R											Endemic
Asteroideae	Heliantheae	Aldama laxicymosa (H. Rob. & A.J. Moore) E.E. Schill. & Panero	Aldama	laxicymosa	(H. Rob. & A.J. Moore) E.E. Schill. & Panero	Bot. J. Linn. Soc.	167(3)	323		2011					R											Endemic
Asteroideae	Heliantheae	Aldama linearifolia (Chodat) E.E. Schill. & Panero	Aldama	linearifolia	(Chodat) E.E. Schill. & Panero	Bot. J. Linn. Soc.	167(3)	324		2011					R						R					Native
Asteroideae	Heliantheae	Aldama macrorhiza (Baker) E.E. Schill. & Panero	Aldama	macrorhiza	(Baker) E.E. Schill. & Panero	Bot. J. Linn. Soc.	167(3)	324		2011					R						R					Native
Asteroideae	Heliantheae	Aldama media (S.F. Blake) E.E. Schill. & Panero	Aldama	media	(S.F. Blake) E.E. Schill. & Panero	Bot. J. Linn. Soc.	167(3)	324		2011	Viguiera media S.F. Blake, Rhysolepis media (S.F. Blake) H. Rob. & A.J. Moore							R								Endemic	Critically Endangered
Asteroideae	Heliantheae	Aldama megapotamica (Malme) Magenta & Pirani	Aldama	megapotamica	(Malme) Magenta & Pirani	Rodriguésia	65(1)	177		2014					R											Endemic
Asteroideae	Heliantheae	Aldama meridionalis (Magenta) E.E. Schill. & Panero	Aldama	meridionalis	(Magenta) E.E. Schill. & Panero	Bot. J. Linn. Soc.	167(3)	324		2011					R											Endemic
Asteroideae	Heliantheae	Aldama misionensis (A.A. Sáenz) S.E. Freire	Aldama	misionensis	(A.A. Sáenz) S.E. Freire	Darwiniana	22(1-3)	62		1979	Viguiera misionensis A.A. Sáenz		R													Endemic
Asteroideae	Heliantheae	Aldama mollis (Griseb.) E.E. Schill. & Panero	Aldama	mollis	(Griseb.) E.E. Schill. & Panero	Bot. J. Linn. Soc.	167(3)	324		2011	Viguiera mollis Griseb.; Helianthopsis mollis (Griseb.) Sala & Echarte; Rhysolepis mollis (Griseb.) H. Rob. & A.J. Moore	Helianthus argentinus A.A. Sáenz	R													Endemic
Asteroideae	Heliantheae	Aldama nudibasilaris (S.F. Blake) E.E. Schill. & Panero	Aldama	nudibasilaris	(S.F. Blake) E.E. Schill. & Panero	Bot. J. Linn. Soc.	167(3)	324		2011					R											Endemic
Asteroideae	Heliantheae	Aldama nudicaulis (Baker) E.E. Schill. & Panero	Aldama	nudicaulis	(Baker) E.E. Schill. & Panero	Bot. J. Linn. Soc.	167(3)	324		2011														R		Endemic
Asteroideae	Heliantheae	Aldama oblongifolia (Gardner) E.E. Schill. & Panero	Aldama	oblongifolia	(Gardner) E.E. Schill. & Panero	Bot. J. Linn. Soc.	167(3)	324		2011					R											Endemic
Asteroideae	Heliantheae	Aldama paranensis (Malme) Magenta & Pirani	Aldama	paranensis	(Malme) Magenta & Pirani	Rodriguésia	65(1)	178		2014					R											Endemic
Asteroideae	Heliantheae	Aldama pilicaulis (S.F. Blake) E.E. Schill. & Panero	Aldama	pilicaulis	(S.F. Blake) E.E. Schill. & Panero	Bot. J. Linn. Soc.	167(3)	324		2011					R						R					Native
Asteroideae	Heliantheae	Aldama pilosa (Baker) E.E. Schill. & Panero	Aldama	pilosa	(Baker) E.E. Schill. & Panero	Bot. J. Linn. Soc.	167(3)	324		2011	Viguiera pilosa Baker; Rhysolepis pilosa (Baker) H. Rob. & A.J. Moore	Viguiera malmei S.F. Blake; Viguiera salicifolia Hassl; Aldama salicifolia (Hassl.) E.E. Schill. & Panero; Viguiera villaricensis S.F. Blake; Rhysolepis salicifolia (Hassl.) H. Rob. & A.J. Moore	R		R						R					Native
Asteroideae	Heliantheae	Aldama revoluta (Meyen) E.E. Schill. & Panero	Aldama	revoluta	(Meyen) E.E. Schill. & Panero	Bot. J. Linn. Soc.	167(3)	324		2011	Helianthus revolutus Meyen; Viguiera revoluta (Meyen) S.F. Blake	Helianthus lanceolatus Meyen; Flourensia corymbosa DC. var. lanceolata (Meyen) Reiche; Flourensia corymbosa DC; Viguiera poeppigii A. Gray; Viguiera corymbosa (DC.) S.F. Blake; Helianthus araucanus Phil; Flourensia coymbosa DC. var. araucana (Phil.) Reiche; Helianthus gayanus Phil; Flourensia gayana (Phil.) Reiche; Viguiera gayana (Phil.) Cabrera ex Espinosa	R			R										Native
Asteroideae	Heliantheae	Aldama robusta (Gardner) E.E. Schill. & Panero	Aldama	robusta	(Gardner) E.E. Schill. & Panero	Bot. J. Linn. Soc.	167(3)	323		2011					R											Endemic
Asteroideae	Heliantheae	Aldama rubra (Magenta & Pirani) E.E. Schill. & Panero	Aldama	rubra	(Magenta & Pirani) E.E. Schill. & Panero	Bot. J. Linn. Soc.	167(3)	325		2011					R											Endemic
Asteroideae	Heliantheae	Aldama santacatarinensis (H. Rob. & A.J. Moore) E.E. Schill. & Panero	Aldama	santacatarinensis	(H. Rob. & A.J. Moore) E.E. Schill. & Panero	Bot. J. Linn. Soc.	167(3)	325		2011					R											Endemic
Asteroideae	Heliantheae	Aldama sodiroi (Hieron.) E.E. Schill. & Panero	Aldama	sodiroi	(Hieron.) E.E. Schill. & Panero	Bot. J. Linn. Soc.	167(3)	325		2011	Helianthus sodiroi Hieron., Rhysolepis sodiroi (Hieron.) H. Rob. & A.J. Moore, Viguiera sodiroi (Hieron.) S.F. Blake							R								Endemic	Vulnerable
Asteroideae	Heliantheae	Aldama squalida (S. Moore) E.E. Schill. & Panero	Aldama	squalida	(S. Moore) E.E. Schill. & Panero	Bot. J. Linn. Soc.	167(3)	325		2011					R											Endemic
Asteroideae	Heliantheae	Aldama subtruncata (H. Rob. & A.J. Moore) E.E. Schill. & Panero	Aldama	subtruncata	(H. Rob. & A.J. Moore) E.E. Schill. & Panero	Bot. J. Linn. Soc.	167(3)	325		2011					R											Endemic
Asteroideae	Heliantheae	Aldama tenuifolia (Gardner) E.E. Schill. & Panero	Aldama	tenuifolia	(Gardner) E.E. Schill. & Panero	Bot. J. Linn. Soc.	167(3)	325		2011					R											Endemic
Asteroideae	Heliantheae	Aldama trichophylla (Dusén) Magenta	Aldama	trichophylla	(Dusén) Magenta	S. African J. Bot.	60(7)	634		2012					R											Endemic
Asteroideae	Heliantheae	Aldama tuberosa (Griseb.) E.E. Schill. & Panero	Aldama	tuberosa	(Griseb.) E.E. Schill. & Panero	Bot. J. Linn. Soc.	167(3)	325		2011	Viguiera tuberosa Griseb; Rhysolepis tuberosa (Griseb.) H. Rob. & A.J. Moore		R		R						R			R		Native
Asteroideae	Heliantheae	Aldama tucumanensis (Hook. & Arn.) E.E. Schill. & Panero	Aldama	tucumanensis	(Hook. & Arn.) E.E. Schill. & Panero	Bot. J. Linn. Soc.	167(3)	325		2011	Leighia tucumanensis Hook. & Arn.; Viguiera tucumanensis (Hook. & Arn.) Griseb; Rhysolepis tucumanensis (Hook. & Arn.) H. Rob. & A.J. Moore;	Viguiera stenophylla (Hook. & Arn.) Griseb. var. discoidea Griseb; Viguiera discoidea (Griseb.) S.F. Blake; Viguiera tucumanensis (Hook.& Arn.) Griseb. var. discoidea (Griseb.) Cabrera; Viguiera oligodonta S.F. Blake; Viguiera tucumanensis (Hook. & Arn.) Griseb. Var. oligodonta (S.F. Blake) Cabrera	R													Endemic
Asteroideae	Heliantheae	Aldama veredensis (Magenta & Pirani) E.E. Schill. & Panero	Aldama	veredensis	(Magenta & Pirani) E.E. Schill. & Panero	Bot. J. Linn. Soc.	167(3)	325		2011					R											Endemic
Asteroideae	Heliantheae	Aldama vernonioides (Baker) E.E. Schill. & Panero	Aldama	vernonioides	(Baker) E.E. Schill. & Panero	Bot. J. Linn. Soc.	167(3)	325		2011					R											Endemic
Asteroideae	Millerieae	Alepidocline annua S.F. Blake	Alepidocline	annua	S.F. Blake	J. Wash. Acad. Sci.	24(10)	441		1934															R	Endemic
Vernonioideae	Vernonieae	Allocephalus gamolepis Bringel, J.N. Nakaj. & H. Rob.	Allocephalus	gamolepis	Bringel, J.N. Nakaj. & H. Rob.	Syst. Bot.	36(3)	785	f. 1, 2	2011					R											Endemic
Asteroideae	Millerieae	Alloispermum caracasanum (Kunth) H. Rob.	Alloispermum	caracasanum	(Kunth) H. Rob.	Phytologia	38(5)	411		1978	Allocarpus caracasanus Kunth, Calea caracasana (Kunth) Kuntze						R	R				R			R	Native
Asteroideae	Millerieae	Alloispermum insuetum C.F. Fernandez, Urbatsch & G.A. Sullivan	Alloispermum	insuetum	C.F. Fernandez, Urbatsch & G.A. Sullivan	Madroño	34(2)	162		1987							R									Endemic
Asteroideae	Millerieae	Alloispermum lindenii (Sch. Bip.) H. Rob.	Alloispermum	lindenii	(Sch. Bip.) H. Rob.	Phytologia	38(5)	412		1978							R								R	Native
Asteroideae	Millerieae	Alloispermum pachensis (Hieron.) H. Rob.	Alloispermum	pachensis	(Hieron.) H. Rob.	Phytologia	38(5)	412		1978							R									Endemic
Asteroideae	Millerieae	Alloispermum sodiroi (Hieron.) H. Rob.	Alloispermum	sodiroi	(Hieron.) H. Rob.	Phytologia	44(7)	426		1979	Calea sodiroi Hieron., Sabazia sodiroi (Hieron.) B.L. Turner						R	R								Native
Asteroideae	Millerieae	Alloispermum steyermarkii H. Rob.	Alloispermum	steyermarkii	H. Rob.	Phytologia	41(1)	33		1978							R								R	Native
Asteroideae	Millerieae	Alloispermum weberbaueri H. Rob.	Alloispermum	weberbaueri	H. Rob.	Phytologia	44(7)	428		1979												R				Endemic
Asteroideae	Eupatorieae	Alomiella hatschbachii R.M. King & H. Rob.	Alomiella	hatschbachii	R.M. King & H. Rob.	Phytologia	56(4)	256		1984					R											Endemic
Asteroideae	Eupatorieae	Alomiella regnellii (Malme) R.M. King & H. Rob.	Alomiella	regnellii	(Malme) R.M. King & H. Rob.	Phytologia	24(5)	396		1972					R											Endemic
Asteroideae	Madieae	Amblyopappus pusillus Hook. & Arn.	Amblyopappus	pusillus	Hook. & Arn.	J. Bot. (Hooker)	3(22)	321		1841						R										Endemic
Asteroideae	Eupatorieae	Amboroa geminata Cabrera	Amboroa	geminata	Cabrera	Bol. Soc. Argent. Bot.	6(2)	92		1956				R												Endemic
Asteroideae	Eupatorieae	Amboroa wurdackii R.M. King & H. Rob.	Amboroa	wurdackii	R.M. King & H. Rob.	Phytologia	31(4)	311		1975												R				Endemic
Asteroideae	Heliantheae	Ambrosia artemisiifolia L.	Ambrosia	artemisiifolia	L.	Sp. Pl.	2	988		1753	Ambrosia elatior var. artemisiifolia (L.) Farw.	Ambrosia elatior var. artemisiifolia (L.) Farw.		R	R		R	R			R	R		R		Native
Asteroideae	Heliantheae	Ambrosia artemisioides Meyen & Walp. ex Meyen	Ambrosia	artemisioides	Meyen & Walp. ex Meyen	Nov. Actorum Acad. Caes. Leop.-Carol. Nat. Cur.	19(Suppl. 1)	268		1843				R		R						R				Native
Asteroideae	Heliantheae	Ambrosia crithmifolia DC.	Ambrosia	crithmifolia	DC.	Prodr. [A. P. de Candolle]	5	525		1836										R					R	Native
Asteroideae	Heliantheae	Ambrosia cumanensis Kunth	Ambrosia	cumanensis	Kunth	Nov. Gen. Sp. (folio ed.)	4(17)	216		1820[1818]					R		R								R	Native
Asteroideae	Heliantheae	Ambrosia dentata (Cabrera) M.O. Dillon	Ambrosia	dentata	(Cabrera) M.O. Dillon	Phytologia	56(5)	337		1984												R				Endemic
Asteroideae	Heliantheae	Ambrosia microcephala DC.	Ambrosia	microcephala	DC.	Prodr. [A. P. de Candolle]	5	527		1836					R				R				R			Native
Asteroideae	Heliantheae	Ambrosia pannosa W.W. Payne	Ambrosia	pannosa	W.W. Payne	Brittonia	18(1)	31		1966												R				Endemic
Asteroideae	Heliantheae	Ambrosia polystachya DC.	Ambrosia	polystachya	DC.	Prodr. [A. P. de Candolle]	5	526		1836		Ambrosia maritima L.			R											Endemic	Least Concern
Asteroideae	Heliantheae	Ambrosia scabra Hook. & Arn.	Ambrosia	scabra	Hook. & Arn.	J. Bot. (Hooker)	3(22)	311		1841			R		R											Native
Mutisioideae	Nassauvieae	Ameghinoa patagonica Speg.	Ameghinoa	patagonica	Speg.	Revista Fac. Agron. Univ. Nac. La Plata	3	539		1897		*No	R													Endemic
Asteroideae	Gnaphalieae	Anaphalis chilensis Reiche	Anaphalis	chilensis	Reiche	Anales Univ. Chile	112	97		1903						R										Endemic
Asteroideae	Senecioneae	Angeldiazia weigendii M.O. Dillon & M. Zapata	Angeldiazia	weigendii	M.O. Dillon & M. Zapata	Arnaldoa	17(1)	19		2010												R				Endemic
Asteroideae	Gnaphalieae	Antennaria chilensis J. Rémy	Antennaria	chilensis	J. Rémy	Fl. Chil.	4(2)	235		1849			R			R										Native
Asteroideae	Gnaphalieae	Antennaria sleumeri Cabrera	Antennaria	sleumeri	Cabrera	Notas Mus. La Plata, Bot.	19(90)	74	f. 1	1957			R													Endemic
Vernonioideae	Vernonieae	Anteremanthus hatschbachii H. Rob.	Anteremanthus	hatschbachii	H. Rob.	Proc. Biol. Soc. Washington	105(3)	646	f. 9–17	1992					R											Endemic
Vernonioideae	Vernonieae	Anteremanthus piranii Roque & F.A. Santana	Anteremanthus	piranii	Roque & F.A. Santana	Syst. Bot.	39(2)	656		2014					R											Endemic	Endangered
Asteroideae	Senecioneae	Anticona glareophila (Cuatrec.) E. Linares, J. Campos & A. Galán	Anticona	glareophila	(Cuatrec.) E. Linares, J. Campos & A. Galán	Perspectiva	15(17)	100		2014												R				Endemic
Asteroideae	Millerieae	Aphanactis antisanensis H. Rob.	Aphanactis	antisanensis	H. Rob.	Brittonia	49(1)	71		1997								R								Endemic	Vulnerable
Asteroideae	Millerieae	Aphanactis barclayae H. Rob.	Aphanactis	barclayae	H. Rob.	Brittonia	49(1)	74		1997								R								Endemic	Endangered
Asteroideae	Millerieae	Aphanactis boliviana H. Rob.	Aphanactis	boliviana	H. Rob.	Brittonia	49(1)	75		1997				R												Endemic
Asteroideae	Millerieae	Aphanactis cocuyensis Cuatrec.	Aphanactis	cocuyensis	Cuatrec.	Caldasia	3(15)	424		1945							R									Endemic
Asteroideae	Millerieae	Aphanactis hutchinsonii H. Rob.	Aphanactis	hutchinsonii	H. Rob.	Phytologia	82(1)	58		1997												R				Endemic
Asteroideae	Millerieae	Aphanactis jamesoniana Wedd.	Aphanactis	jamesoniana	Wedd.	Chlor. Andina	1(4-6)	142		1856							R	R								Native	Least Concern
Asteroideae	Millerieae	Aphanactis ollgaardii H. Rob.	Aphanactis	ollgaardii	H. Rob.	Brittonia	49(1)	76		1997								R								Endemic	Least Concern
Asteroideae	Millerieae	Aphanactis piloselloides Cuatrec.	Aphanactis	piloselloides	Cuatrec.	Revista Acad. Colomb. Ci. Exact.	9(35)	233		1954							R									Endemic
Asteroideae	Millerieae	Aphanactis villosa S.F. Blake	Aphanactis	villosa	S.F. Blake	J. Wash. Acad. Sci.	16(8)	215		1926								R				R				Native
Mutisioideae	Onoserideae	Aphyllocladus denticulatus (J. Rémy) Cabrera	Aphyllocladus	denticulatus	(J. Rémy) Cabrera	Darwiniana	9(3-4)	367		1951						R						R				Native
Mutisioideae	Onoserideae	Aphyllocladus ephedroides Cabrera	Aphyllocladus	ephedroides	Cabrera	Darwiniana	9(3-4)	370		1951		*No	R													Endemic
Mutisioideae	Onoserideae	Aphyllocladus sanmartinianus Molfino	Aphyllocladus	sanmartinianus	Molfino	Bol. Soc. Argent. Bot.	5(1-2)	30		1953		*No	R													Endemic
Mutisioideae	Onoserideae	Aphyllocladus spartioides Wedd.	Aphyllocladus	spartioides	Wedd.	Chlor. Andina	1(1)	11		1855		Hyalis spartioides (Wedd.) Griseb., Plazia spartioides (Wedd.) Kuntze	R	R												Native
Asteroideae	Astereae	Apopyros corymbosus (Hook. & Arn.) G.L. Nesom	Apopyros	corymbosus	(Hook. & Arn.) G.L. Nesom	Phytologia	76(2)	178		1994	Diplopappus corymbosus Hook. & Arn.		R		R						R					Native
Asteroideae	Astereae	Apopyros warmingii (Baker) G.L. Nesom	Apopyros	warmingii	(Baker) G.L. Nesom	Phytologia	76(2)	179		1994					R											Endemic
Asteroideae	Senecioneae	Arbelaezaster ellsworthii (Cuatrec.) Cuatrec.	Arbelaezaster	ellsworthii	(Cuatrec.) Cuatrec.	Caldasia	15(71-75)	2		1986							R								R	Native
Asteroideae	Astereae	Archibaccharis serratifolia (Kunth) S.F. Blake	Archibaccharis	serratifolia	(Kunth) S.F. Blake	Contr. U.S. Natl. Herb.	26(5)	236		1930							R									Endemic
Barnadesioideae	Barnadesieae	Archidasyphyllum diacanthoides (Less.) Cabrera	Archidasyphyllum	diacanthoides	(Less.) Cabrera	PeerJ	7(e6475)	13		2019	Flotovia diacanthoides Less., Piptocarpha diacanthoides (Less.) Hook. & Arn., Dasyphyllum diacanthoides (Less.) Cabrera		R			R										Native
Barnadesioideae	Barnadesieae	Archidasyphyllum excelsum (D. Don) Cabrera	Archidasyphyllum	excelsum	(D. Don) Cabrera	PeerJ	7(e6475)	14		2019						R										Endemic
Asteroideae	Eupatorieae	Aristeguietia amethystina (B.L. Rob.) R.M. King & H. Rob.	Aristeguietia	amethystina	(B.L. Rob.) R.M. King & H. Rob.	Phytologia	30(3)	219		1975	Eupatorium amethystinum B.L. Rob.							R				R				Native
Asteroideae	Eupatorieae	Aristeguietia anisodonta (B.L. Rob.) R.M. King & H. Rob.	Aristeguietia	anisodonta	(B.L. Rob.) R.M. King & H. Rob.	Phytologia	30(3)	219		1975												R				Endemic
Asteroideae	Eupatorieae	Aristeguietia arborea (Kunth) R.M. King & H. Rob.	Aristeguietia	arborea	(Kunth) R.M. King & H. Rob.	Phytologia	30(3)	219		1975	Eupatorium arboreum Kunth							R								Endemic	Vulnerable
Asteroideae	Eupatorieae	Aristeguietia ballii (Oliv.) R.M. King & H. Rob.	Aristeguietia	ballii	(Oliv.) R.M. King & H. Rob.	Phytologia	30(3)	219		1975												R				Endemic
Asteroideae	Eupatorieae	Aristeguietia buddleifolia (Benth.) R.M. King & H. Rob.	Aristeguietia	buddleifolia	(Benth.) R.M. King & H. Rob.	Phytologia	30(3)	219		1975	Eupatorium buddleifolium Benth.							R				R				Native
Asteroideae	Eupatorieae	Aristeguietia cacalioides (Kunth) R.M. King & H. Rob.	Aristeguietia	cacalioides	(Kunth) R.M. King & H. Rob.	Phytologia	30(3)	219		1975	Eupatorium cacalioides Kunth							R								Endemic	Near Threatened
Asteroideae	Eupatorieae	Aristeguietia chimborazensis (Hieron.) R.M. King & H. Rob.	Aristeguietia	chimborazensis	(Hieron.) R.M. King & H. Rob.	Phytologia	30(3)	219		1975	Eupatorium chimborazense Hieron.							R								Endemic	Endangered
Asteroideae	Eupatorieae	Aristeguietia cursonii (B.L. Rob.) R.M. King & H. Rob.	Aristeguietia	cursonii	(B.L. Rob.) R.M. King & H. Rob.	Phytologia	30(3)	219		1975												R				Endemic
Asteroideae	Eupatorieae	Aristeguietia dielsii (B.L. Rob.) R.M. King & H. Rob.	Aristeguietia	dielsii	(B.L. Rob.) R.M. King & H. Rob.	Phytologia	30(3)	219		1975	Eupatorium dielsii B.L. Rob.							R								Endemic
Asteroideae	Eupatorieae	Aristeguietia diplodictyon (B.L. Rob.) R.M. King & H. Rob.	Aristeguietia	diplodictyon	(B.L. Rob.) R.M. King & H. Rob.	Phytologia	30(3)	219		1975							R					R				Native	Data Deficient
Asteroideae	Eupatorieae	Aristeguietia discolor R.M. King & H. Rob.	Aristeguietia	discolor	R.M. King & H. Rob.	Phytologia	30(3)	220		1975												R				Endemic	Lower Risk/near threatened
Asteroideae	Eupatorieae	Aristeguietia gascae (B.L. Rob.) R.M. King & H. Rob.	Aristeguietia	gascae	(B.L. Rob.) R.M. King & H. Rob.	Phytologia	30(3)	220		1975												R				Endemic
Asteroideae	Eupatorieae	Aristeguietia gayana (Wedd.) R.M. King & H. Rob.	Aristeguietia	gayana	(Wedd.) R.M. King & H. Rob.	Phytologia	30(3)	220		1975												R				Endemic
Asteroideae	Eupatorieae	Aristeguietia glutinosa (Lam.) R.M. King & H. Rob.	Aristeguietia	glutinosa	(Lam.) R.M. King & H. Rob.	Phytologia	30(3)	220		1975	Eupatorium glutinosum Lam.							R								Endemic	Least Concern
Asteroideae	Eupatorieae	Aristeguietia lamiifolia (Kunth) R.M. King & H. Rob.	Aristeguietia	lamiifolia	(Kunth) R.M. King & H. Rob.	Phytologia	30(3)	220		1975	Eupatorium lamiifolium Kunth						R	R								Native
Asteroideae	Eupatorieae	Aristeguietia persicifolia (Kunth) R.M. King & H. Rob.	Aristeguietia	persicifolia	(Kunth) R.M. King & H. Rob.	Phytologia	30(3)	220		1975	Eupatorium persicifolium Kunth							R								Endemic
Asteroideae	Eupatorieae	Aristeguietia pseudarborea (Hieron.) R.M. King & H. Rob.	Aristeguietia	pseudarborea	(Hieron.) R.M. King & H. Rob.	Phytologia	30(3)	220		1975												R				Endemic
Asteroideae	Eupatorieae	Aristeguietia salvia (Colla) R.M. King & H. Rob.	Aristeguietia	salvia	(Colla) R.M. King & H. Rob.	Phytologia	30(3)	220		1975						R										Endemic
Asteroideae	Eupatorieae	Aristeguietia tahonensis (Hieron.) R.M. King & H. Rob.	Aristeguietia	tahonensis	(Hieron.) R.M. King & H. Rob.	Phytologia	30(3)	220		1975												R				Endemic
Asteroideae	Eupatorieae	Aristeguietia tatamensis (B.L. Rob.) R.M. King & H. Rob.	Aristeguietia	tatamensis	(B.L. Rob.) R.M. King & H. Rob.	Phytologia	30(3)	220		1975							R									Endemic
Asteroideae	Eupatorieae	Aristeguietia uribei R.M. King & H. Rob.	Aristeguietia	uribei	R.M. King & H. Rob.	Phytologia	54(1)	36		1983							R									Endemic
Barnadesioideae	Barnadesieae	Arnaldoa argentea C. Ulloa, P. Jørg. & M.O. Dillon	Arnaldoa	argentea	C. Ulloa, P. Jørg. & M.O. Dillon	Novon	12(3)	415		2002								R								Endemic
Barnadesioideae	Barnadesieae	Arnaldoa coccinosantha (Muschl.) Ferreyra	Arnaldoa	coccinosantha	(Muschl.) Ferreyra	Publ. Mus. Hist. Nat. Javier Prado, Ser. B, Bot.	19	6		1965												R				Endemic
Barnadesioideae	Barnadesieae	Arnaldoa macbrideana Ferreyra	Arnaldoa	macbrideana	Ferreyra	Publ. Mus. Hist. Nat. Javier Prado, Ser. B, Bot.	20	6		1965												R				Endemic
Barnadesioideae	Barnadesieae	Arnaldoa weberbaueri (Muschl.) Ferreyra	Arnaldoa	weberbaueri	(Muschl.) Ferreyra	Publ. Mus. Hist. Nat. Javier Prado, Ser. B, Bot.	21	2		1965												R				Endemic
Asteroideae	Eupatorieae	Arrojadocharis praxeloides (Mattf.) Mattf.	Arrojadocharis	praxeloides	(Mattf.) Mattf.	Notizbl. Bot. Gart. Berlin-Dahlem	10(100)	1053		1930					R											Endemic
Asteroideae	Eupatorieae	Arrojadocharis santosii R.M. King & H. Rob.	Arrojadocharis	santosii	R.M. King & H. Rob.	Phytologia	44(7)	464		1979					R											Endemic
Asteroideae	Anthemideae	Artemisia copa Phil.	Artemisia	copa	Phil.	Fl. Atacam.		33		1860			R			R										Native
Asteroideae	Anthemideae	Artemisia echegarayi Hieron.	Artemisia	echegarayi	Hieron.	Bol. Acad. Nac. Ci.	4(1)	42		1881			R													Endemic
Asteroideae	Anthemideae	Artemisia magellanica Sch. Bip.	Artemisia	magellanica	Sch. Bip.	Flora	38	116		1855			R		R	R										Native
Asteroideae	Anthemideae	Artemisia mendozana DC.	Artemisia	mendozana	DC.	Prodr. [A. P. de Candolle]	6	105		1838		Seriphidium mendozanum (DC.) K. Bremer & Humphries	R													Endemic
Asteroideae	Anthemideae	Artemisia sodiroi Hieron.	Artemisia	sodiroi	Hieron.	Bot. Jahrb. Syst.	29(1)	55		1900							R	R								Native
Asteroideae	Eupatorieae	Ascidiogyne sanchezvegae Cabrera	Ascidiogyne	sanchezvegae	Cabrera	Hickenia	1(1)	2		1976												R				Endemic	Near Threatened
Asteroideae	Eupatorieae	Ascidiogyne wurdackii Cuatrec.	Ascidiogyne	wurdackii	Cuatrec.	Ann. Missouri Bot. Gard.	52(3)	310		1965												R				Endemic
Asteroideae	Heliantheae	Aspilia albuquerquei J.U. Santos	Aspilia	albuquerquei	J.U. Santos	Bol. Mus. Paraense Emilio Goeldi, N.S., Bot.	9(2)	209		1993[1994]					R											Endemic
Asteroideae	Heliantheae	Aspilia almasensis D.J.N. Hind	Aspilia	almasensis	D.J.N. Hind	Kew Bull.	48(2)	273		1993					R											Endemic
Asteroideae	Heliantheae	Aspilia andrade-limae J.U. Santos	Aspilia	andrade-limae	J.U. Santos	Bol. Mus. Paraense Emilio Goeldi, N.S., Bot.	2(1)	5		1985					R											Endemic
Asteroideae	Heliantheae	Aspilia attenuata (Gardner) Baker	Aspilia	attenuata	(Gardner) Baker	Fl. Bras.	6(3)	199		1884					R											Endemic
Asteroideae	Heliantheae	Aspilia aurantiaca Griseb.	Aspilia	aurantiaca	Griseb.	Abh. Königl. Ges. Wiss. Göttingen	19	183		1874		Wedelia aurantiaca (Griseb.) B.L. Turner	R													Endemic
Asteroideae	Heliantheae	Aspilia belo-horizontinae J.U. Santos	Aspilia	belo-horizontinae	J.U. Santos	Revista Brasil. Bot.	19(1)	96		1996					R											Endemic
Asteroideae	Heliantheae	Aspilia bishoplecta H. Rob.	Aspilia	bishoplecta	H. Rob.	Phytologia	56(4)	264		1984					R											Endemic
Asteroideae	Heliantheae	Aspilia bonplandiana (Gardner) S.F. Blake	Aspilia	bonplandiana	(Gardner) S.F. Blake	Contr. U.S. Natl. Herb.	20(10)	421		1921					R											Endemic
Asteroideae	Heliantheae	Aspilia camporum Chodat	Aspilia	camporum	Chodat	Bull. Herb. Boissier, sér. 2,	3	720		1903					R						R					Native
Asteroideae	Heliantheae	Aspilia caudata J.U. Santos	Aspilia	caudata	J.U. Santos	Revista Brasil. Bot.	19(1)	93		1996					R											Endemic
Asteroideae	Heliantheae	Aspilia cavalcantei J.U. Santos	Aspilia	cavalcantei	J.U. Santos	Bol. Mus. Paraense Emilio Goeldi, N.S., Bot.	7(1)	154		1991					R											Endemic
Asteroideae	Heliantheae	Aspilia cearensis J.U. Santos	Aspilia	cearensis	J.U. Santos	Bol. Mus. Paraense Emilio Goeldi, N.S., Bot.	9(2)	210		1993[1994]					R											Endemic
Asteroideae	Heliantheae	Aspilia clausseniana Baker	Aspilia	clausseniana	Baker	Fl. Bras.	6(3)	202		1884			R		R						R					Native
Asteroideae	Heliantheae	Aspilia cordifolia J.U. Santos	Aspilia	cordifolia	J.U. Santos	Bol. Mus. Paraense Emilio Goeldi, N.S., Bot.	3(1)	51		1987					R											Endemic
Asteroideae	Heliantheae	Aspilia cylindrocephala H. Rob.	Aspilia	cylindrocephala	H. Rob.	Phytologia	56(4)	266		1984					R											Endemic
Asteroideae	Heliantheae	Aspilia diamantinae J.U. Santos	Aspilia	diamantinae	J.U. Santos	Revista Brasil. Bot.	19(1)	96		1996					R											Endemic
Asteroideae	Heliantheae	Aspilia diffusiflora H. Rob.	Aspilia	diffusiflora	H. Rob.	Phytologia	55(6)	416		1984					R											Endemic
Asteroideae	Heliantheae	Aspilia diniz-cruzeanae J.U. Santos	Aspilia	diniz-cruzeanae	J.U. Santos	Revista Brasil. Bot.	19(1)	102		1996					R											Endemic
Asteroideae	Heliantheae	Aspilia discolor J.U. Santos	Aspilia	discolor	J.U. Santos	Bol. Mus. Paraense Emilio Goeldi, N.S., Bot.	10(1)	113		1994[1995]					R											Endemic
Asteroideae	Heliantheae	Aspilia duarteana J.U. Santos	Aspilia	duarteana	J.U. Santos	Revista Brasil. Bot.	19(1)	90		1996					R											Endemic
Asteroideae	Heliantheae	Aspilia eglerii J.U. Santos	Aspilia	eglerii	J.U. Santos	Revista Brasil. Bot.	19(1)	99		1996					R											Endemic
Asteroideae	Heliantheae	Aspilia elata Pilg.	Aspilia	elata	Pilg.	Bot. Jahrb. Syst.	30(2)	203		1901					R											Endemic
Asteroideae	Heliantheae	Aspilia erosa J.U. Santos	Aspilia	erosa	J.U. Santos	Revista Brasil. Bot.	19(1)	90		1996					R											Endemic
Asteroideae	Heliantheae	Aspilia espinhacensis J.U. Santos	Aspilia	espinhacensis	J.U. Santos	Bol. Mus. Paraense Emilio Goeldi, N.S., Bot.	3(1)	55	f.	1987					R											Endemic
Asteroideae	Heliantheae	Aspilia floribunda (Gardner) Baker	Aspilia	floribunda	(Gardner) Baker	Fl. Bras.	6(3)	198		1884					R											Endemic
Asteroideae	Heliantheae	Aspilia foliacea (Spreng.) Baker	Aspilia	foliacea	(Spreng.) Baker	Fl. Bras.	6(3)	193		1884					R						R					Native
Asteroideae	Heliantheae	Aspilia foliosa (Gardner) Baker	Aspilia	foliosa	(Gardner) Baker	Fl. Bras.	6(3)	204		1884	Anomostephium foliosum Gardner				R											Endemic
Asteroideae	Heliantheae	Aspilia fruticosa (Gardner) Baker	Aspilia	fruticosa	(Gardner) Baker	Fl. Bras.	6(3)	204		1884					R											Endemic
Asteroideae	Heliantheae	Aspilia glaziovii Baker	Aspilia	glaziovii	Baker	Bull. Misc. Inform. Kew	1895	106		1895					R											Endemic
Asteroideae	Heliantheae	Aspilia goiazensis J.U. Santos	Aspilia	goiazensis	J.U. Santos	Bol. Mus. Paraense Emilio Goeldi, N.S., Bot.	10(1)	109		1994[1995]					R											Endemic
Asteroideae	Heliantheae	Aspilia grazielae J.U. Santos	Aspilia	grazielae	J.U. Santos	Cadernos Pesquisa, Sér. Bot.	2	71		1982					R											Endemic
Asteroideae	Heliantheae	Aspilia hassleriana Chodat	Aspilia	hassleriana	Chodat	Bull. Herb. Boissier, sér. 2,	2	391		1902											R					Endemic
Asteroideae	Heliantheae	Aspilia hatschbachii J.U. Santos	Aspilia	hatschbachii	J.U. Santos	Bol. Mus. Paraense Emilio Goeldi, N.S., Bot.	10(1)	106		1994[1995]					R											Endemic
Asteroideae	Heliantheae	Aspilia heringeriana H. Rob.	Aspilia	heringeriana	H. Rob.	Phytologia	56(4)	267		1984					R											Endemic
Asteroideae	Heliantheae	Aspilia hispidantha H. Rob.	Aspilia	hispidantha	H. Rob.	Phytologia	56(4)	268		1984					R											Endemic
Asteroideae	Heliantheae	Aspilia ioletae J.U. Santos	Aspilia	ioletae	J.U. Santos	Bol. Mus. Paraense Emilio Goeldi, N.S., Bot.	9(2)	208		1993[1994]					R											Endemic
Asteroideae	Heliantheae	Aspilia itabaianensis J.U. Santos	Aspilia	itabaianensis	J.U. Santos	Bol. Mus. Paraense Emilio Goeldi, N.S., Bot.	9(2)	212		1993[1994]					R											Endemic
Asteroideae	Heliantheae	Aspilia jelskii (Hieron.) S.F. Blake	Aspilia	jelskii	(Hieron.) S.F. Blake	Contr. U.S. Natl. Herb.	22(8)	619		1924												R				Endemic
Asteroideae	Heliantheae	Aspilia jolyana G.M. Barroso	Aspilia	jolyana	G.M. Barroso	Sellowia	26	106		1975					R											Endemic
Asteroideae	Heliantheae	Aspilia jugata H. Rob.	Aspilia	jugata	H. Rob.	Phytologia	55(6)	417		1984					R											Endemic
Asteroideae	Heliantheae	Aspilia kunthiana (Gardner) S.F. Blake	Aspilia	kunthiana	(Gardner) S.F. Blake	Contr. U.S. Natl. Herb.	26(5)	251		1930					R											Endemic
Asteroideae	Heliantheae	Aspilia laevissima (Less. ex Baker) Baker	Aspilia	laevissima	(Less. ex Baker) Baker	Fl. Bras.	6(3)	202		1884					R											Endemic
Asteroideae	Heliantheae	Aspilia latissima Malme	Aspilia	latissima	Malme	Kongl. Svenska Vetensk. Acad. Handl., n.f.,	32(5)	63	pl. 5, f. 16	1899					R						R					Native
Asteroideae	Heliantheae	Aspilia leucanthema Chodat	Aspilia	leucanthema	Chodat	Bull. Herb. Boissier, sér. 2,	2	391		1902											R					Endemic
Asteroideae	Heliantheae	Aspilia leucoglossa Malme	Aspilia	leucoglossa	Malme	Kongl. Svenska Vetensk. Acad. Handl., n.f.,	32(5)	63		1899					R											Endemic
Asteroideae	Heliantheae	Aspilia linearis S.F. Blake	Aspilia	linearis	S.F. Blake	Contr. U.S. Natl. Herb.	22(8)	619		1924		Aspilia linearifolia Baker	R													Endemic
Asteroideae	Heliantheae	Aspilia martii Baker	Aspilia	martii	Baker	Fl. Bras.	6(3)	195		1884					R											Endemic
Asteroideae	Heliantheae	Aspilia matogrossensis J.U. Santos	Aspilia	matogrossensis	J.U. Santos	Bol. Mus. Paraense Emilio Goeldi, N.S., Bot.	10(1)	111		1994[1995]					R											Endemic
Asteroideae	Heliantheae	Aspilia montevidensis (Spreng.) Kuntze	Aspilia	montevidensis	(Spreng.) Kuntze	Revis. Gen. Pl.	3(3)	129		1898	Verbesina montevidensis Spreng; Wedelia montevidensis (Spreng.) B.L. Turner	Leighia arillata DC.; Aspilia arillata (DC.) Griseb.; Leighia buphthalmiflora DC; Aspilia buphthalmiflora (DC.) Griseb; Leighia calendulacea DC.; Aspilia calendulacea (DC.) Griseb.; Aspilia setosa Griseb; Aspilia montevidensis (Spreng.) Kuntze var. setosa (Griseb.) Cabrera	R		R						R			R		Native
Asteroideae	Heliantheae	Aspilia ovatifolia (DC.) Baker	Aspilia	ovatifolia	(DC.) Baker	Fl. Bras.	6(3)	199		1884	Anomostephium ovatifolium DC., Aspilia ovalifolia[ovatifolia] (DC.) Baker				R											Endemic
Asteroideae	Heliantheae	Aspilia paraensis (Huber) J.U. Santos	Aspilia	paraensis	(Huber) J.U. Santos	Bol. Mus. Paraense Hist. Nat. Ethnogr.	55	7		1982					R											Endemic
Asteroideae	Heliantheae	Aspilia pascalioides Griseb.	Aspilia	pascalioides	Griseb.	Abh. Königl. Ges. Wiss. Göttingen	24	191		1879		Wedelia pascalioides (Griseb.) B.L. Turner	R		R						R			R		Native
Asteroideae	Heliantheae	Aspilia pereirae J.U. Santos	Aspilia	pereirae	J.U. Santos	Revista Brasil. Bot.	19(1)	93		1996					R											Endemic
Asteroideae	Heliantheae	Aspilia phyllostachya Baker	Aspilia	phyllostachya	Baker	Fl. Bras.	6(3)	201		1884											R					Endemic
Asteroideae	Heliantheae	Aspilia platyphylla (Baker) S.F. Blake	Aspilia	platyphylla	(Baker) S.F. Blake	Contr. Gray Herb.	54	188		1918					R											Endemic
Asteroideae	Heliantheae	Aspilia podophylla Baker	Aspilia	podophylla	Baker	Fl. Bras.	6(3)	200		1884					R											Endemic
Asteroideae	Heliantheae	Aspilia pohlii (Sch. Bip. ex Baker) Baker	Aspilia	pohlii	(Sch. Bip. ex Baker) Baker	Fl. Bras.	6(3)	201		1884					R											Endemic
Asteroideae	Heliantheae	Aspilia procumbens Baker	Aspilia	procumbens	Baker	Fl. Bras.	6(3)	194		1884					R											Endemic
Asteroideae	Heliantheae	Aspilia prostrata J.U. Santos	Aspilia	prostrata	J.U. Santos	Revista Brasil. Bot.	19(1)	88		1996					R											Endemic
Asteroideae	Heliantheae	Aspilia pseudoyedaea H. Rob.	Aspilia	pseudoyedaea	H. Rob.	Phytologia	56(4)	270		1984					R											Endemic
Asteroideae	Heliantheae	Aspilia reflexa (Sch. Bip. ex Baker) Baker	Aspilia	reflexa	(Sch. Bip. ex Baker) Baker	Fl. Bras.	6(3)	196		1884					R						R					Native
Asteroideae	Heliantheae	Aspilia reticulata Baker	Aspilia	reticulata	Baker	Fl. Bras.	6(3)	202		1884					R											Endemic
Asteroideae	Heliantheae	Aspilia riedelii Baker	Aspilia	riedelii	Baker	Fl. Bras.	6(3)	196		1884					R						R					Native
Asteroideae	Heliantheae	Aspilia silphioides (Hook. & Arn.) Benth. & Hook. f.	Aspilia	silphioides	(Hook. & Arn.) Benth. & Hook. f.	Gen. Pl. [Bentham & Hooker f.]	2(1)	372		1873	Leighia silphioides Hook. & Arn; Wedelia silphioides (Hook. & Arn.) B.L. Turner	Gymnopsis helianthoides DC.	R		R						R			R		Native
Asteroideae	Heliantheae	Aspilia squarrosa Baker	Aspilia	squarrosa	Baker	Fl. Bras.	6(3)	203		1884					R											Endemic
Asteroideae	Heliantheae	Aspilia subalpestris Baker	Aspilia	subalpestris	Baker	Fl. Bras.	6(3)	202		1884					R											Endemic
Asteroideae	Heliantheae	Aspilia subscandens J.U. Santos	Aspilia	subscandens	J.U. Santos	Bol. Mus. Paraense Emilio Goeldi, N.S., Bot.	9(2)	213		1993[1994]					R											Endemic
Asteroideae	Heliantheae	Aspilia ulei Hieron.	Aspilia	ulei	Hieron.	Verh. Bot. Vereins Prov. Brandenburg	48(2)	205		1907					R											Endemic
Asteroideae	Heliantheae	Aspilia warmingii Baker	Aspilia	warmingii	Baker	Fl. Bras.	6(3)	192		1884					R											Endemic
Asteroideae	Eupatorieae	Asplundianthus arcuans (B.L. Rob.) R.M. King & H. Rob.	Asplundianthus	arcuans	(B.L. Rob.) R.M. King & H. Rob.	Phytologia	30(3)	224		1975							R									Endemic
Asteroideae	Eupatorieae	Asplundianthus densus (Benth.) R.M. King & H. Rob.	Asplundianthus	densus	(Benth.) R.M. King & H. Rob.	Phytologia	30(3)	225		1975							R									Endemic	Least Concern
Asteroideae	Eupatorieae	Asplundianthus pseudoglomeratus (Hieron.) R.M. King & H. Rob.	Asplundianthus	pseudoglomeratus	(Hieron.) R.M. King & H. Rob.	Phytologia	30(3)	225		1975	Eupatorium pseudoglomeratum Hieron.							R								Endemic
Asteroideae	Eupatorieae	Asplundianthus pseudostuebelii R.M. King & H. Rob.	Asplundianthus	pseudostuebelii	R.M. King & H. Rob.	Phytologia	30(3)	225		1975							R	R								Native
Asteroideae	Eupatorieae	Asplundianthus sagasteguii R.M. King & H. Rob.	Asplundianthus	sagasteguii	R.M. King & H. Rob.	Phytologia	39(3)	136		1978												R				Endemic
Asteroideae	Eupatorieae	Asplundianthus scabrifolius (B.L. Rob.) R.M. King & H. Rob.	Asplundianthus	scabrifolius	(B.L. Rob.) R.M. King & H. Rob.	Phytologia	30(3)	226		1975												R				Endemic
Asteroideae	Eupatorieae	Asplundianthus smilacinoides H. Rob.	Asplundianthus	smilacinoides	H. Rob.	Fl. Ecuador	83(190:3)	76		2008								R								Endemic
Asteroideae	Eupatorieae	Asplundianthus smilacinus (Kunth) R.M. King & H. Rob.	Asplundianthus	smilacinus	(Kunth) R.M. King & H. Rob.	Phytologia	30(3)	226		1975	Eupatorium smilacinum Kunth, Osmia smilacina (Kunth) Sch. Bip.						R	R							R	Native
Asteroideae	Eupatorieae	Asplundianthus stuebelii (Hieron.) R.M. King & H. Rob.	Asplundianthus	stuebelii	(Hieron.) R.M. King & H. Rob.	Phytologia	30(3)	226		1975	Eupatorium stuebelii Hieron.						R	R				R				Native
Asteroideae	Eupatorieae	Asplundianthus toroi (B.L. Rob.) R.M. King & H. Rob.	Asplundianthus	toroi	(B.L. Rob.) R.M. King & H. Rob.	Phytologia	30(3)	226		1975							R									Endemic
Asteroideae	Eupatorieae	Asplundianthus trachyphyllus (Hieron.) R.M. King & H. Rob.	Asplundianthus	trachyphyllus	(Hieron.) R.M. King & H. Rob.	Phytologia	30(3)	226		1975												R				Endemic
Asteroideae	Astereae	Aster quitensis Willd. ex Spreng.	Aster	quitensis	Willd. ex Spreng.	Syst. Veg. [Sprengel]	3	533		1826								R								Endemic	Critically Endangered
Asteroideae	Astereae	Aster sodiroi Hieron.	Aster	sodiroi	Hieron.	Bot. Jahrb. Syst.	29(1)	20		1900								R								Endemic
Asteroideae	Astereae	Asteropsis macrocephala Less.	Asteropsis	macrocephala	Less.	Syn. Gen. Compos.		188		1832														R		Endemic
Asteroideae	Astereae	Asteropsis megapotamica (Spreng.) Marchesi, Bonif. & G. Sancho	Asteropsis	megapotamica	(Spreng.) Marchesi, Bonif. & G. Sancho	Brittonia	61(1)	3		2009	Aster megapotamicus Spreng.				R											Endemic
Asteroideae	Eupatorieae	Austrobrickellia arnottii (Baker) R.M. King & H. Rob.	Austrobrickellia	arnottii	(Baker) R.M. King & H. Rob.	Phytologia	24(2)	73		1972	Eupatorium arnottii Baker	Mikania scandens (L.) Willd. var. â Hook. & Arn; Mikania tenuiflora Griseb; Eupatorium tenuiflorum (Griseb.) Hieron; Willoughbya tenuiflora (Griseb.) Kuntze	R	R							R					Native
Asteroideae	Eupatorieae	Austrobrickellia bakerianum (B.L. Rob.) R.M. King & H. Rob.	Austrobrickellia	bakerianum	(B.L. Rob.) R.M. King & H. Rob.	Phytologia	24(2)	73		1972					R											Endemic
Asteroideae	Eupatorieae	Austrobrickellia patens (D. Don ex Hook. & Arn.) R.M. King & H. Rob.	Austrobrickellia	patens	(D. Don ex Hook. & Arn.) R.M. King & H. Rob.	Phytologia	24(2)	73		1972	Eupatorium patens D. Don ex Hook. & Arn		R	R							R					Native
Asteroideae	Eupatorieae	Austrocritonia angulicaulis (Sch. Bip. ex Baker) R.M. King & H. Rob.	Austrocritonia	angulicaulis	(Sch. Bip. ex Baker) R.M. King & H. Rob.	Phytologia	31(1)	116		1975					R											Endemic	Least Concern
Asteroideae	Eupatorieae	Austrocritonia rosea (Gardner) R.M. King & H. Rob.	Austrocritonia	rosea	(Gardner) R.M. King & H. Rob.	Phytologia	31(1)	116		1975					R											Endemic
Asteroideae	Eupatorieae	Austrocritonia taunayana (Glaz. ex B.L. Rob.) R.M. King & H. Rob.	Austrocritonia	taunayana	(Glaz. ex B.L. Rob.) R.M. King & H. Rob.	Phytologia	37(5)	456		1977					R											Endemic
Asteroideae	Eupatorieae	Austrocritonia velutina (Gardner) R.M. King & H. Rob.	Austrocritonia	velutina	(Gardner) R.M. King & H. Rob.	Phytologia	31(1)	117		1975					R											Endemic
Asteroideae	Eupatorieae	Austroeupatorium albescens (Gardner) H. Rob.	Austroeupatorium	albescens	(Gardner) H. Rob.	Monogr. Syst. Bot. Missouri Bot. Gard.	127	1271		2014				R	R											Native
Asteroideae	Eupatorieae	Austroeupatorium apensis (Chodat) R.M. King & H. Rob.	Austroeupatorium	apensis	(Chodat) R.M. King & H. Rob.	Phytologia	51(3)	179		1982					R						R					Native
Asteroideae	Eupatorieae	Austroeupatorium chaparense (B.L. Rob.) R.M. King & H. Rob.	Austroeupatorium	chaparense	(B.L. Rob.) R.M. King & H. Rob.	Phytologia	19(7)	433		1970				R												Endemic
Asteroideae	Eupatorieae	Austroeupatorium decemflorum (DC.) R.M. King & H. Rob.	Austroeupatorium	decemflorum	(DC.) R.M. King & H. Rob.	Phytologia	45(6)	465		1980	Eupatorium decemflorum DC.			R			R	R				R				Native
Asteroideae	Eupatorieae	Austroeupatorium inulifolium (Kunth) R.M. King & H. Rob.	Austroeupatorium	inulifolium	(Kunth) R.M. King & H. Rob.	Phytologia	19(7)	434		1970	Eupatorium inulifolium Kunth	Eupatorium molle Kunth; Eupatorium suaveolens Kunth; Eupatorium inulifolium Kunth fo. suaveolens (Kunth) Hieron; Eupatorium pallescens DC; Eupatorium pallescens DC. var. hirsuta DC; Eupatorium pallescens DC. var. bonariense DC; Eupatorium entreriense Hieron; Austroeupatorium entreriense (Hieron.) R.M. King & H. Rob.,; Eupatorium pallidum Hook. & Arn; Eupatorium paranense Hook. & Arn	R	R	R		R	R		R	R	R		R	R	Native
Asteroideae	Eupatorieae	Austroeupatorium laetevirens (Hook. & Arn.) R.M. King & H. Rob.	Austroeupatorium	laetevirens	(Hook. & Arn.) R.M. King & H. Rob.	Phytologia	19(7)	434		1970	Eupatorium laetevirens Hook. & Arn.	Eupatorium steviifolium DC. var. laetevirens (Hook. & Arn.) Baker; Eupatorium steviifolium DC. var. salicinum Chodat;	R		R						R					Native
Asteroideae	Eupatorieae	Austroeupatorium morii R.M. King & H. Rob.	Austroeupatorium	morii	R.M. King & H. Rob.	Phytologia	50(5)	379		1982					R											Endemic
Asteroideae	Eupatorieae	Austroeupatorium neglectum (B.L. Rob.) R.M. King & H. Rob.	Austroeupatorium	neglectum	(B.L. Rob.) R.M. King & H. Rob.	Phytologia	19(7)	434		1970				R	R											Native
Asteroideae	Eupatorieae	Austroeupatorium paulinum (DC.) R.M. King & H. Rob.	Austroeupatorium	paulinum	(DC.) R.M. King & H. Rob.	Phytologia	19(7)	434		1970					R											Endemic
Asteroideae	Eupatorieae	Austroeupatorium petrophilum (B.L. Rob.) R.M. King & H. Rob.	Austroeupatorium	petrophilum	(B.L. Rob.) R.M. King & H. Rob.	Phytologia	19(7)	434		1970					R											Endemic
Asteroideae	Eupatorieae	Austroeupatorium picturatum (Malme) R.M. King & H. Rob.	Austroeupatorium	picturatum	(Malme) R.M. King & H. Rob.	Phytologia	19(7)	434		1970	Eupatorium picturatum Malme		R		R											Native
Asteroideae	Eupatorieae	Austroeupatorium rosmarinaceum (Cabrera & Vittet) R.M. King & H. Rob.	Austroeupatorium	rosmarinaceum	(Cabrera & Vittet) R.M. King & H. Rob.	Phytologia	49(1)	3		1981					R											Endemic
Asteroideae	Eupatorieae	Austroeupatorium silphiifolium (Mart.) R.M. King & H. Rob.	Austroeupatorium	silphiifolium	(Mart.) R.M. King & H. Rob.	Phytologia	51(3)	179		1982				R	R											Native
Vernonioideae	Liabeae	Austroliabum candidum (Griseb.) H. Rob. & Brettell	Austroliabum	candidum	(Griseb.) H. Rob. & Brettell	Phytologia	28(1)	49		1974	Liabum candidum Griseb., Microliabum candidum (Griseb.) H.Rob.,	Liabum auriculatum Griseb., Liabum subcirrhosum, Liabum candidum var. subcirrhosum (S.F. Blake) Cabrera	R													Endemic
Vernonioideae	Liabeae	Austroliabum eremophilum (Cabrera) H. Rob. & Brettell	Austroliabum	eremophilum	(Cabrera) H. Rob. & Brettell	Phytologia	28(1)	49		1974	Liabum eremophilum Cabrera, Microliabum eremophilum (Cabrera) H.Rob.		R													Endemic
Vernonioideae	Liabeae	Austroliabum glanduliferum (Cabrera) D.G. Gut., N. Garcia, Susanna & Grossi	Austroliabum	glanduliferum	(Cabrera) D.G. Gut., N. Garcia, Susanna & Grossi	Taxon	68(6)	1243		2019	Liabum candidum var. glanduliferum Cabrera, Microliabum glanduliferum (Cabrera) H.Rob.		R													Endemic
Asteroideae	Eupatorieae	Ayapana amygdalina (Lam.) R.M. King & H. Rob.	Ayapana	amygdalina	(Lam.) R.M. King & H. Rob.	Phytologia	20(3)	211		1970	Eupatorium amygdalinum Lam.			R	R		R	R		R	R	R	R		R	Native
Asteroideae	Eupatorieae	Ayapana ecuadorensis R.M. King & H. Rob.	Ayapana	ecuadorensis	R.M. King & H. Rob.	Phytologia	34(1)	57		1976							R	R								Native	Vulnerable
Asteroideae	Eupatorieae	Ayapana elata (Steetz) R.M. King & H. Rob.	Ayapana	elata	(Steetz) R.M. King & H. Rob.	Phytologia	27(4)	235		1973							R					R				Native
Asteroideae	Eupatorieae	Ayapana haughtii R.M. King & H. Rob.	Ayapana	haughtii	R.M. King & H. Rob.	Phytologia	34(1)	58		1976							R									Endemic
Asteroideae	Eupatorieae	Ayapana hylophila (B.L. Rob.) R.M. King & H. Rob.	Ayapana	hylophila	(B.L. Rob.) R.M. King & H. Rob.	Phytologia	20(3)	211		1970							R									Endemic
Asteroideae	Eupatorieae	Ayapana jaramillii R.M. King & H. Rob.	Ayapana	jaramillii	R.M. King & H. Rob.	Phytologia	20(3)	211		1970							R									Endemic
Asteroideae	Eupatorieae	Ayapana lanceolata R.M. King & H. Rob.	Ayapana	lanceolata	R.M. King & H. Rob.	Phytologia	34(1)	59		1976				R	R							R				Native
Asteroideae	Eupatorieae	Ayapana lopez-palaciosii V.M. Badillo	Ayapana	lopez-palaciosii	V.M. Badillo	Ernstia n.s.,	5(2)	81		1995															R	Endemic
Asteroideae	Eupatorieae	Ayapana ornithophora (B.L. Rob.) R.M. King & H. Rob.	Ayapana	ornithophora	(B.L. Rob.) R.M. King & H. Rob.	Phytologia	20(6)	333		1970							R									Endemic
Asteroideae	Eupatorieae	Ayapana pilluanensis (Hieron.) R.M. King & H. Rob.	Ayapana	pilluanensis	(Hieron.) R.M. King & H. Rob.	Phytologia	34(1)	60		1976												R			R	Native
Asteroideae	Eupatorieae	Ayapana robinsonii S. Díaz	Ayapana	robinsonii	S. Díaz	Trianea	4	275		1991							R									Endemic
Asteroideae	Eupatorieae	Ayapana stenolepis (Steetz) R.M. King & H. Rob.	Ayapana	stenolepis	(Steetz) R.M. King & H. Rob.	Phytologia	32(3)	284		1975				R	R											Native
Asteroideae	Eupatorieae	Ayapana tovarensis (B.L. Rob.) R.M. King & H. Rob.	Ayapana	tovarensis	(B.L. Rob.) R.M. King & H. Rob.	Phytologia	20(3)	212		1970							R								R	Native
Asteroideae	Eupatorieae	Ayapana trinitensis (Kuntze) R.M. King & H. Rob.	Ayapana	trinitensis	(Kuntze) R.M. King & H. Rob.	Phytologia	20(3)	212		1970							R								R	Native
Asteroideae	Eupatorieae	Ayapana triplinervis (Vahl) R.M. King & H. Rob.	Ayapana	triplinervis	(Vahl) R.M. King & H. Rob.	Phytologia	20(3)	212		1970	Eupatorium triplinerve Vahl				R			R	R							Native
Asteroideae	Eupatorieae	Ayapana turbacensis (Hieron.) R.M. King & H. Rob.	Ayapana	turbacensis	(Hieron.) R.M. King & H. Rob.	Phytologia	20(3)	212		1970							R									Endemic
Asteroideae	Eupatorieae	Ayapanopsis adenophora R.M. King & H. Rob.	Ayapanopsis	adenophora	R.M. King & H. Rob.	Phytologia	24(5)	383		1972				R												Endemic
Asteroideae	Eupatorieae	Ayapanopsis andina (B.L. Rob.) R.M. King & H. Rob.	Ayapanopsis	andina	(B.L. Rob.) R.M. King & H. Rob.	Phytologia	24(5)	384		1972												R				Endemic
Asteroideae	Eupatorieae	Ayapanopsis beckii H. Rob.	Ayapanopsis	beckii	H. Rob.	BioLlania (Ed. Espec.)	6	509		1997				R												Endemic
Asteroideae	Eupatorieae	Ayapanopsis cuchabensis (B.L. Rob.) R.M. King & H. Rob.	Ayapanopsis	cuchabensis	(B.L. Rob.) R.M. King & H. Rob.	Phytologia	31(4)	312		1975	Eupatorium cuchabense B.L. Rob.						R	R								Native
Asteroideae	Eupatorieae	Ayapanopsis dydima (Klatt) R.M. King & H. Rob.	Ayapanopsis	dydima	(Klatt) R.M. King & H. Rob.	Phytologia	24(5)	384		1972	Eupatorium didymum Klatt; Heterocondylus didymus (Klatt) R.M. King & H. Rob;	Eupatorium didymum Klatt var. glandulitectum B.L. Rob	R													Endemic
Asteroideae	Eupatorieae	Ayapanopsis esperanzae (Hassl.) R.M. King & H. Rob.	Ayapanopsis	esperanzae	(Hassl.) R.M. King & H. Rob.	Phytologia	24(5)	384		1972	Eupatorium esperanzae Hassl.	Eupatorium schininii Cabrera; Eupatorium esperanzae Hassl. var. schininii (Cabrera) Cabrera	R								R					Native
Asteroideae	Eupatorieae	Ayapanopsis euphyes (B.L. Rob.) R.M. King & H. Rob.	Ayapanopsis	euphyes	(B.L. Rob.) R.M. King & H. Rob.	Phytologia	24(5)	384		1972				R												Endemic
Asteroideae	Eupatorieae	Ayapanopsis ferreyrii R.M. King & H. Rob.	Ayapanopsis	ferreyrii	R.M. King & H. Rob.	Phytologia	31(4)	312		1975												R				Endemic
Asteroideae	Eupatorieae	Ayapanopsis latipaniculata (Rusby) R.M. King & H. Rob.	Ayapanopsis	latipaniculata	(Rusby) R.M. King & H. Rob.	Phytologia	24(5)	385		1972				R												Endemic
Asteroideae	Eupatorieae	Ayapanopsis luteynii H. Rob. & Pruski	Ayapanopsis	luteynii	H. Rob. & Pruski	BioLlania (Ed. Espec.)	6	510		1997								R								Endemic	Vulnerable
Asteroideae	Eupatorieae	Ayapanopsis mathewsii (B.L. Rob.) R.M. King & H. Rob.	Ayapanopsis	mathewsii	(B.L. Rob.) R.M. King & H. Rob.	Phytologia	24(5)	385		1972												R				Endemic
Asteroideae	Eupatorieae	Ayapanopsis oblongifolia (Gardner) R.M. King & H. Rob.	Ayapanopsis	oblongifolia	(Gardner) R.M. King & H. Rob.	Phytologia	49(1)	3		1981					R											Endemic
Asteroideae	Eupatorieae	Ayapanopsis tarapotensis (B.L. Rob.) R.M. King & H. Rob.	Ayapanopsis	tarapotensis	(B.L. Rob.) R.M. King & H. Rob.	Phytologia	24(5)	385		1972												R				Endemic
Asteroideae	Eupatorieae	Ayapanopsis triosteifolia (Rusby) R.M. King & H. Rob.	Ayapanopsis	triosteifolia	(Rusby) R.M. King & H. Rob.	Phytologia	24(5)	385		1972				R												Endemic
Asteroideae	Eupatorieae	Ayapanopsis trixioides (Mart. ex Baker) R.M. King & H. Rob.	Ayapanopsis	trixioides	(Mart. ex Baker) R.M. King & H. Rob.	Phytologia	24(5)	385		1972				R												Endemic
Asteroideae	Eupatorieae	Ayapanopsis tucumanensis (Lillo & B.L. Rob.) R.M. King & H. Rob.	Ayapanopsis	tucumanensis	(Lillo & B.L. Rob.) R.M. King & H. Rob.	Phytologia	24(5)	385		1972	Eupatorium tucumanense Lillo & B.L. Rob		R	R												Native
Asteroideae	Eupatorieae	Ayapanopsis vargasii R.M. King & H. Rob.	Ayapanopsis	vargasii	R.M. King & H. Rob.	Phytologia	24(5)	385		1972												R				Endemic
Asteroideae	Eupatorieae	Ayapanopsis wurdackiana H. Rob.	Ayapanopsis	wurdackiana	H. Rob.	BioLlania (Ed. Espec.)	6	511		1997												R				Endemic
Asteroideae	Astereae	Aylacophora deserticola Cabrera	Aylacophora	deserticola	Cabrera	Bol. Soc. Argent. Bot.	4(4)	268		1953		Nardophyllum deserticola (Cabrera) G.L. Nesom	R													Endemic
Vernonioideae	Vernonieae	Aynia pseudascaricida H. Rob.	Aynia	pseudascaricida	H. Rob.	Proc. Biol. Soc. Washington	101(4)	959		1988												R				Endemic
Asteroideae	Astereae	Baccharis acaulis (Wedd. ex R.E. Fr.) Cabrera	Baccharis	acaulis	(Wedd. ex R.E. Fr.) Cabrera	Bol. Soc. Argent. Bot.	16(3)	255		1975	Heterothalamus acaulis Wedd. ex R.E. Fr.		R	R		R						R				Native
Asteroideae	Astereae	Baccharis alaternoides Kunth	Baccharis	alaternoides	Kunth	Nov. Gen. Sp. (folio ed.)	4(14)	40		1820[1818]								R				R				Native
Asteroideae	Astereae	Baccharis albida Hook. & Arn.	Baccharis	albida	Hook. & Arn.	J. Bot. (Hooker)	3(17)	41		1840			R													Endemic
Asteroideae	Astereae	Baccharis albilanosa A.S. Oliveira & Deble	Baccharis	albilanosa	A.S. Oliveira & Deble	Balduinia	9	4	f. 1	2006					R											Endemic
Asteroideae	Astereae	Baccharis aliena (Spreng.) Joch. Müll.	Baccharis	aliena	(Spreng.) Joch. Müll.	Syst. Bot. Monogr.	76	305		2006	Marshallia aliena Spreng.; Heterothalamus alienus (Spreng.) Kuntze		R		R									R		Native
Asteroideae	Astereae	Baccharis alleluia A.S. Oliveira & Deble	Baccharis	alleluia	A.S. Oliveira & Deble	Bonplandia (Corrientes)	18(1)	45	f. 1	2009					R											Endemic
Asteroideae	Astereae	Baccharis alnifolia Meyen & Walp.	Baccharis	alnifolia	Meyen & Walp.	Nov. Actorum Acad. Caes. Leop.-Carol. Nat. Cur.	19(Suppl. 1)	264		1844						R						R				Native
Asteroideae	Astereae	Baccharis alpestris Gardner	Baccharis	alpestris	Gardner	London J. Bot.	4	122		1845					R											Endemic
Asteroideae	Astereae	Baccharis alpina Kunth	Baccharis	alpina	Kunth	Nov. Gen. Sp. (folio ed.)	4(14)	38		1820[1818]		Baccharis alpina Kunth; Baccharis caespitosa var. alpina (Kunth) Cuatrec.	R	R		R	R					R				Native
Asteroideae	Astereae	Baccharis altimontana G. Heiden, Baumgratz & R. Esteves	Baccharis	altimontana	G. Heiden, Baumgratz & R. Esteves	J. Bot. Res. Inst. Texas	3(1)	140		2009					R											Endemic
Asteroideae	Astereae	Baccharis amambayensis Zardini & Soria	Baccharis	amambayensis	Zardini & Soria	Candollea	46(2)	535	f. 1	1991											R					Endemic
Asteroideae	Astereae	Baccharis angusticeps Dusén ex Malme	Baccharis	angusticeps	Dusén ex Malme	Kongl. Svenska Vetensk. Acad. Handl., n.f.,	12(2)	77		1933					R											Endemic
Asteroideae	Astereae	Baccharis anomala DC.	Baccharis	anomala	DC.	Prodr. [A. P. de Candolle]	5	403		1836		Pingraea anomala (DC.) F.H. Hellw.	R		R						R			R		Native
Asteroideae	Astereae	Baccharis antioquensis Killip & Cuatrec.	Baccharis	antioquensis	Killip & Cuatrec.	Mutisia	17	1		1953							R									Endemic
Asteroideae	Astereae	Baccharis aphylla (Vell.) DC.	Baccharis	aphylla	(Vell.) DC.	Prodr. [A. P. de Candolle]	5	424		1836				R	R											Native
Asteroideae	Astereae	Baccharis arbutifolia Vahl	Baccharis	arbutifolia	Vahl	Symb. Bot. (Vahl)	3	97		1794								R				R				Native	Near Threatened
Asteroideae	Astereae	Baccharis arenaria Baker	Baccharis	arenaria	Baker	Fl. Bras.	6(3)	62		1882			R		R									R		Native
Asteroideae	Astereae	Baccharis aretioides Turcz.	Baccharis	aretioides	Turcz.	Bull. Soc. Imp. Naturalistes Moscou	24(3)	68		1851								R								Endemic	Critically Endangered
Asteroideae	Astereae	Baccharis argentina Heering	Baccharis	argentina	Heering	Jahrb. Hamburg. Wiss. Anst.	31(3)	142		1914		Baccharis vernicosa W. Hook. & Arn.	R													Endemic
Asteroideae	Astereae	Baccharis arguta Gillies ex Hook. & Arn.	Baccharis	arguta	Gillies ex Hook. & Arn.	J. Bot. (Hooker)	3(17)	35		1840				R								R				Native
Asteroideae	Astereae	Baccharis artemisioides Hook. & Arn.	Baccharis	artemisioides	Hook. & Arn.	J. Bot. (Hooker)	3(17)	41		1840			R													Endemic
Asteroideae	Astereae	Baccharis articulata (Lam.) Pers.	Baccharis	articulata	(Lam.) Pers.	Syn. Pl. [Persoon]	2(2)	425		1807			R	R	R						R			R		Native
Asteroideae	Astereae	Baccharis auriculigera Hieron.	Baccharis	auriculigera	Hieron.	Bot. Jahrb. Syst.	36(5)	478		1905								R				R				Native
Asteroideae	Astereae	Baccharis axillaris DC.	Baccharis	axillaris	DC.	Prodr. [A. P. de Candolle]	5	407		1836					R											Endemic
Asteroideae	Astereae	Baccharis ayacuchensis Cuatrec.	Baccharis	ayacuchensis	Cuatrec.	Phytologia	49(1)	69		1981												R				Endemic
Asteroideae	Astereae	Baccharis barragensis Cuatrec.	Baccharis	barragensis	Cuatrec.	Mutisia	17	2		1953							R									Endemic
Asteroideae	Astereae	Baccharis beckii Joch. Müll.	Baccharis	beckii	Joch. Müll.	Syst. Bot. Monogr.	76	232		2006				R												Endemic
Asteroideae	Astereae	Baccharis bifrons Baker	Baccharis	bifrons	Baker	Fl. Bras.	6(3)	54		1882					R											Endemic
Asteroideae	Astereae	Baccharis bogotensis Kunth	Baccharis	bogotensis	Kunth	Nov. Gen. Sp. (folio ed.)	4(14)	47		1820[1818]							R									Endemic
Asteroideae	Astereae	Baccharis boliviensis (Wedd.) Cabrera	Baccharis	boliviensis	(Wedd.) Cabrera	Bol. Soc. Argent. Bot.	16(3)	256		1975	Heterothalamus boliviensis Wedd.		R	R		R						R				Native
Asteroideae	Astereae	Baccharis boyacensis Cuatrec.	Baccharis	boyacensis	Cuatrec.	Mutisia	17	3		1953							R									Endemic
Asteroideae	Astereae	Baccharis brachylaenoides DC.	Baccharis	brachylaenoides	DC.	Prodr. [A. P. de Candolle]	5	421		1836		Baccharis oblongifolia (Ruiz & Pav.) Pers.	R							R					D	Native	Least Concern
Asteroideae	Astereae	Baccharis brevifolia DC.	Baccharis	brevifolia	DC.	Prodr. [A. P. de Candolle]	5	409		1836					R									R		Native
Asteroideae	Astereae	Baccharis breviseta DC.	Baccharis	breviseta	DC.	Prodr. [A. P. de Candolle]	5	402		1836		Baccharidastrum argutum (Less.) Cabrera	R		R		R				R			R		Native
Asteroideae	Astereae	Baccharis buchtienii H. Rob.	Baccharis	buchtienii	H. Rob.	Phytologia	65(1)	38		1988				R								R				Native	Least Concern
Asteroideae	Astereae	Baccharis buddlejoides Kunth	Baccharis	buddlejoides	Kunth	Nov. Gen. Sp. (folio ed.)	4(14)	50		1820[1818]							R	R				R				Native
Asteroideae	Astereae	Baccharis burchellii Baker	Baccharis	burchellii	Baker	Fl. Bras.	6(3)	44		1882					R											Endemic
Asteroideae	Astereae	Baccharis buxifolia (Lam.) Pers.	Baccharis	buxifolia	(Lam.) Pers.	Syn. Pl. [Persoon]	2(2)	424		1807	Conyza buxifolia Lam.							R				R				Native
Asteroideae	Astereae	Baccharis cabrerae Ariza	Baccharis	cabrerae	Ariza	Kurtziana	7	187	f. 1	1973			R													Endemic
Asteroideae	Astereae	Baccharis caespitosa (Ruiz & Pav.) Pers.	Baccharis	caespitosa	(Ruiz & Pav.) Pers.	Syn. Pl. [Persoon]	2(2)	425		1807	Molina caespitosa Ruiz & Pav.			R				R				R				Native
Asteroideae	Astereae	Baccharis caldasiana Cuatrec.	Baccharis	caldasiana	Cuatrec.	Mutisia	17	3		1953							R									Endemic
Asteroideae	Astereae	Baccharis calliprinos Griseb.	Baccharis	calliprinos	Griseb.	Abh. Königl. Ges. Wiss. Göttingen	19	177		1874		Baccharis salicifolia (Ruiz & Pav.) Pers.	R													Endemic
Asteroideae	Astereae	Baccharis calvescens DC.	Baccharis	calvescens	DC.	Prodr. [A. P. de Candolle]	5	413		1836					R											Endemic
Asteroideae	Astereae	Baccharis camporum DC.	Baccharis	camporum	DC.	Prodr. [A. P. de Candolle]	5	399		1836			R								R					Native
Asteroideae	Astereae	Baccharis campos-portoana Malag.	Baccharis	campos-portoana	Malag.	Mem. Soc. Ci. Nat. La Salle	37(107)	138		1977					R											Endemic
Asteroideae	Astereae	Baccharis cana Joch. Müll.	Baccharis	cana	Joch. Müll.	Syst. Bot. Monogr.	76	151		2006				R												Endemic
Asteroideae	Astereae	Baccharis capitalensis Heering	Baccharis	capitalensis	Heering	Jahrb. Hamburg. Wiss. Anst.	31(3)	102		1914			R	R												Native
Asteroideae	Astereae	Baccharis caprariifolia DC.	Baccharis	caprariifolia	DC.	Prodr. [A. P. de Candolle]	5	416		1836		Baccharis recurvata Gardner	R		R						R			R		Native
Asteroideae	Astereae	Baccharis cataphracta Spreng.	Baccharis	cataphracta	Spreng.	Syst. Veg. [Sprengel]	3	462		1826												R				Endemic
Asteroideae	Astereae	Baccharis cayambense Cuatrec.	Baccharis	cayambense	Cuatrec.	Brittonia	8(3)	183		1956								R								Endemic
Asteroideae	Astereae	Baccharis chachapoyasensis Cuatrec.	Baccharis	chachapoyasensis	Cuatrec.	Proc. Biol. Soc. Washington	77	139		1964												R				Endemic
Asteroideae	Astereae	Baccharis chilcaura Hieron.	Baccharis	chilcaura	Hieron.	Bot. Jahrb. Syst.	36(5)	477		1905												R				Endemic
Asteroideae	Astereae	Baccharis chilco Kunth	Baccharis	chilco	Kunth	Nov. Gen. Sp. (folio ed.)	4(14)	44		1820[1818]	Baccharis linearifolia subsp. chilco (Kunth) Joch. Müll.				R		R	R				R				Native
Asteroideae	Astereae	Baccharis chionolaenoides D. Falkenberg & Deble	Baccharis	chionolaenoides	D. Falkenberg & Deble	Darwiniana	48(1)	64		2010					R											Endemic
Asteroideae	Astereae	Baccharis chrysophylla (F.H. Hellw.) G. Heiden	Baccharis	chrysophylla	(F.H. Hellw.) G. Heiden	Phytotaxa	459(1)	83		2020						R										Endemic
Asteroideae	Astereae	Baccharis ciliata Gardner	Baccharis	ciliata	Gardner	London J. Bot.	4	122		1845					R											Endemic
Asteroideae	Astereae	Baccharis cinerea DC.	Baccharis	cinerea	DC.	Prodr. [A. P. de Candolle]	5	400		1836					R											Endemic
Asteroideae	Astereae	Baccharis claussenii Baker	Baccharis	claussenii	Baker	Fl. Bras.	6(3)	99		1882					R											Endemic
Asteroideae	Astereae	Baccharis cochensis Hieron.	Baccharis	cochensis	Hieron.	Bot. Jahrb. Syst.	21(3)	343		1896							R	R								Native
Asteroideae	Astereae	Baccharis cognata DC.	Baccharis	cognata	DC.	Prodr. [A. P. de Candolle]	5	413		1836			R		R						R					Native
Asteroideae	Astereae	Baccharis concava (Ruiz & Pav.) Pers.	Baccharis	concava	(Ruiz & Pav.) Pers.	Syn. Pl. [Persoon]	2(2)	425		1807						R										Endemic
Asteroideae	Astereae	Baccharis concinna G.M. Barroso	Baccharis	concinna	G.M. Barroso	Rodriguésia	28(40)	162		1976					R											Endemic
Asteroideae	Astereae	Baccharis conyzoides (Less.) DC.	Baccharis	conyzoides	(Less.) DC.	Prodr. [A. P. de Candolle]	5	403		1836	Molina conyzoides Less., Pingraea conyzoides (DC.) F.H. Hellw.				R											Endemic
Asteroideae	Astereae	Baccharis cordobensis Heering	Baccharis	cordobensis	Heering	Jahrb. Hamburg. Wiss. Anst.	31(3)	132		1914			R													Endemic
Asteroideae	Astereae	Baccharis coridifolia DC.	Baccharis	coridifolia	DC.	Prodr. [A. P. de Candolle]	5	422		1836			R	R	R						R			R		Native
Asteroideae	Astereae	Baccharis coronata Giuliano	Baccharis	coronata	Giuliano	Novon	16(4)	490	f. 1	2006					R											Endemic
Asteroideae	Astereae	Baccharis corymbosa (Ruiz & Pav.) Pers.	Baccharis	corymbosa	(Ruiz & Pav.) Pers.	Syn. Pl. [Persoon]	2(2)	424		1807												R				Endemic
Asteroideae	Astereae	Baccharis crassipappa Deble & A.S. Oliveira	Baccharis	crassipappa	Deble & A.S. Oliveira	Bonplandia (Corrientes)	17(1)	14		2008					R											Endemic
Asteroideae	Astereae	Baccharis crispa Spreng.	Baccharis	crispa	Spreng.	Syst. Veg. [Sprengel]	3	466		1826		Baccharis cylindrica (Less.) DC	R		R						R			R		Native
Asteroideae	Astereae	Baccharis cultrata Baker	Baccharis	cultrata	Baker	Fl. Bras.	6(3)	93		1882					R									R		Native
Asteroideae	Astereae	Baccharis curitybensis Heering ex Malme	Baccharis	curitybensis	Heering ex Malme	Kongl. Svenska Vetensk. Acad. Handl., n.f.,	12(2)	69		1933					R											Endemic
Asteroideae	Astereae	Baccharis cutervensis Hieron.	Baccharis	cutervensis	Hieron.	Bot. Jahrb. Syst.	36(5)	479		1905								R				R				Native
Asteroideae	Astereae	Baccharis cymosa Phil.	Baccharis	cymosa	Phil.	Anales Univ. Chile	87	703		1894						R										Endemic
Asteroideae	Astereae	Baccharis darwinii Hook. & Arn.	Baccharis	darwinii	Hook. & Arn.	J. Bot. (Hooker)	3(17)	39		1840		Baccharis angulata Griseb	R	R										R		Native
Asteroideae	Astereae	Baccharis davidsonii Cuatrec.	Baccharis	davidsonii	Cuatrec.	Phytologia	49(1)	71		1981												R				Endemic	Critically Endangered
Asteroideae	Astereae	Baccharis deblei A.S. Oliveira & Marchiori	Baccharis	deblei	A.S. Oliveira & Marchiori	Balduinia	3	1		2005					R											Endemic
Asteroideae	Astereae	Baccharis decussata (Klatt) Hieron.	Baccharis	decussata	(Klatt) Hieron.	Bot. Jahrb. Syst.	28(5)	589		1901				R			R								R	Native
Asteroideae	Astereae	Baccharis deltoidea Baker	Baccharis	deltoidea	Baker	Fl. Bras.	6(3)	90		1882					R											Endemic
Asteroideae	Astereae	Baccharis densa (N.E. Br.) V.M. Badillo	Baccharis	densa	(N.E. Br.) V.M. Badillo	Ernstia	16	16		1983					R					R					R	Native
Asteroideae	Astereae	Baccharis densiflora Wedd.	Baccharis	densiflora	Wedd.	Chlor. Andina	1(4-6)	175		1856				R												Endemic
Asteroideae	Astereae	Baccharis dentata (Vell.) G.M. Barroso	Baccharis	dentata	(Vell.) G.M. Barroso	Rodriguésia	28(40)	123		1976	Chrysocoma dentata Vell.	Baccharis macrodonta DC.	R		R						R					Native
Asteroideae	Astereae	Baccharis dependens Pers.	Baccharis	dependens	Pers.	Syn. Pl. [Persoon]	2(2)	424		1807												R				Endemic
Asteroideae	Astereae	Baccharis dichotoma G. Heiden & L.D. Meireles	Baccharis	dichotoma	G. Heiden & L.D. Meireles	Brittonia	62(3)	215		2010					R											Endemic
Asteroideae	Astereae	Baccharis divaricata Hauman	Baccharis	divaricata	Hauman	Anal. Mus. Nac. Hist. Nat. Buenos Aires	24	429	f. 19	1913			R													Endemic
Asteroideae	Astereae	Baccharis dracunculifolia DC.	Baccharis	dracunculifolia	DC.	Prodr. [A. P. de Candolle]	5	421		1836		Baccharis leptospermoides DC	R	R	R						R	R		R		Native
Asteroideae	Astereae	Baccharis dubia Deble & A.S. Oliveira	Baccharis	dubia	Deble & A.S. Oliveira	Balduinia	9	10		2006					R											Endemic
Asteroideae	Astereae	Baccharis dudleyi Cuatrec.	Baccharis	dudleyi	Cuatrec.	Phytologia	49(1)	70		1981												R				Endemic
Asteroideae	Astereae	Baccharis dunensis A.A. Schneid. & G. Heiden	Baccharis	dunensis	A.A. Schneid. & G. Heiden	Rodriguésia	61(1)	73		2010					R											Endemic
Asteroideae	Astereae	Baccharis effusa Griseb.	Baccharis	effusa	Griseb.	Abh. Königl. Ges. Wiss. Göttingen	19	177		1874			R	R												Native
Asteroideae	Astereae	Baccharis elaeoides J. Rémy	Baccharis	elaeoides	J. Rémy	Fl. Chil.	4(1)	88		1849			R			R										Native
Asteroideae	Astereae	Baccharis elliptica Gardner	Baccharis	elliptica	Gardner	London J. Bot.	7	83		1848					R											Endemic
Asteroideae	Astereae	Baccharis emarginata (Ruiz & Pav.) Pers.	Baccharis	emarginata	(Ruiz & Pav.) Pers.	Syn. Pl. [Persoon]	2(2)	424		1807	Molina emarginata Ruiz & Pav.							R				R				Native
Asteroideae	Astereae	Baccharis erectifolia Steyerm.	Baccharis	erectifolia	Steyerm.	Fieldiana, Bot.	28(3)	620		1953															R	Endemic
Asteroideae	Astereae	Baccharis erigeroides DC.	Baccharis	erigeroides	DC.	Prodr. [A. P. de Candolle]	5	418		1836					R											Endemic
Asteroideae	Astereae	Baccharis erioclada DC.	Baccharis	erioclada	DC.	Prodr. [A. P. de Candolle]	5	415		1836					R						R					Native
Asteroideae	Astereae	Baccharis espadae Cuatrec.	Baccharis	espadae	Cuatrec.	Anales Univ. Madrid, Ci.	4(2)	210	f. 1	1935												R				Endemic
Asteroideae	Astereae	Baccharis famatinensis Ariza	Baccharis	famatinensis	Ariza	Lorentzia	2	5	f. 1	1973			R													Endemic
Asteroideae	Astereae	Baccharis flabellata Hook. & Arn.	Baccharis	flabellata	Hook. & Arn.	J. Bot. (Hooker)	3(17)	28		1840			R											R		Native
Asteroideae	Astereae	Baccharis flexuosiramosa A.A. Schneid. & Boldrini	Baccharis	flexuosiramosa	A.A. Schneid. & Boldrini	J. Bot. Res. Inst. Texas	2(1)	48		2008					R											Endemic
Asteroideae	Astereae	Baccharis floccosa Deble & A.S. Oliveira	Baccharis	floccosa	Deble & A.S. Oliveira	Balduinia	37	27		2012					R											Endemic
Asteroideae	Astereae	Baccharis floribundoides Cuatrec.	Baccharis	floribundoides	Cuatrec.	Revista Acad. Colomb. Ci. Exact.	13(49)	42		1967							R									Endemic
Asteroideae	Astereae	Baccharis fraterna Cuatrec.	Baccharis	fraterna	Cuatrec.	Mutisia	17	5		1953							R									Endemic
Asteroideae	Astereae	Baccharis frenguellii Cabrera	Baccharis	frenguellii	Cabrera	Darwiniana	16(1-2)	409		1970			R								R					Native
Asteroideae	Astereae	Baccharis friburgensis G. Heiden, Baumgratz & R. Esteves	Baccharis	friburgensis	G. Heiden, Baumgratz & R. Esteves	J. Bot. Res. Inst. Texas	3(1)	143		2009					R											Endemic
Asteroideae	Astereae	Baccharis frigida Kunth	Baccharis	frigida	Kunth	Nov. Gen. Sp. (folio ed.)	4(14)	38		1820[1818]												R				Endemic
Asteroideae	Astereae	Baccharis fusca Turcz.	Baccharis	fusca	Turcz.	Bull. Soc. Imp. Naturalistes Moscou	24(3)	67		1851								R								Endemic	Critically Endangered
Asteroideae	Astereae	Baccharis gaucha G. Heiden	Baccharis	gaucha	G. Heiden	Phytotaxa	459(1)	81		2020					R											Endemic
Asteroideae	Astereae	Baccharis genistelloides (Lam.) Pers.	Baccharis	genistelloides	(Lam.) Pers.	Syn. Pl. [Persoon]	2(2)	425		1807	Conyza genistelloides Lam.			R		R	R	R				R				Native
Asteroideae	Astereae	Baccharis genistifolia DC.	Baccharis	genistifolia	DC.	Prodr. [A. P. de Candolle]	5	423		1836			R											R		Native
Asteroideae	Astereae	Baccharis gibertii Baker	Baccharis	gibertii	Baker	Fl. Bras.	6(3)	52		1882					R									R		Native
Asteroideae	Astereae	Baccharis gilliesii A. Gray	Baccharis	gilliesii	A. Gray	Proc. Amer. Acad. Arts	5	123		1861		Baccharis nana D. Don ex Baker	R													Endemic
Asteroideae	Astereae	Baccharis glaziovii Baker	Baccharis	glaziovii	Baker	Fl. Bras.	6(3)	44		1882					R											Endemic
Asteroideae	Astereae	Baccharis glomerata Joch. Müll.	Baccharis	glomerata	Joch. Müll.	Syst. Bot. Monogr.	76	127		2006				R												Endemic
Asteroideae	Astereae	Baccharis glutinosa Pers.	Baccharis	glutinosa	Pers.	Syn. Pl. [Persoon]	2(2)	425		1807		Conyza montevidensis Spreng.	R	R	R	R					R					Native
Asteroideae	Astereae	Baccharis gnaphalioides Spreng.	Baccharis	gnaphalioides	Spreng.	Syst. Veg. [Sprengel]	3	461		1826		Baccharis radicans DC	R		R									R		Native
Asteroideae	Astereae	Baccharis gnidiifolia Kunth	Baccharis	gnidiifolia	Kunth	Nov. Gen. Sp. (folio ed.)	4(14)	48		1820[1818]	Neomolina gnidiifolia (Kunth) F.H. Hellw.			R		R		R								Native
Asteroideae	Astereae	Baccharis gracilis DC.	Baccharis	gracilis	DC.	Prodr. [A. P. de Candolle]	5	423		1836					R						R					Native
Asteroideae	Astereae	Baccharis granadina Cuatrec.	Baccharis	granadina	Cuatrec.	Mutisia	17	6		1953							R	R								Native
Asteroideae	Astereae	Baccharis grandicapitulata Hieron.	Baccharis	grandicapitulata	Hieron.	Bot. Jahrb. Syst.	36(5)	481		1905								R				R				Native
Asteroideae	Astereae	Baccharis grandiflora Kunth	Baccharis	grandiflora	Kunth	Nov. Gen. Sp. (folio ed.)	4(14)	45		1820[1818]							R	R								Native
Asteroideae	Astereae	Baccharis grandimucronata Malag.	Baccharis	grandimucronata	Malag.	Contr. Inst. Geobiol. La Salle Canoas	8	38		1957					R											Endemic
Asteroideae	Astereae	Baccharis grisebachii Hieron.	Baccharis	grisebachii	Hieron.	Bol. Acad. Ci. (Cordoba)	4	36		1881		Baccharis abietina Kuntze	R	R												Native
Asteroideae	Astereae	Baccharis hambatensis Kunth	Baccharis	hambatensis	Kunth	Nov. Gen. Sp. (folio ed.)	4(14)	49		1820[1818]								R								Endemic	Vulnerable
Asteroideae	Astereae	Baccharis helichrysoides DC.	Baccharis	helichrysoides	DC.	Prodr. [A. P. de Candolle]	5	415		1836		Baccharis lanuginosa Gardner	R		R						R					Native
Asteroideae	Astereae	Baccharis hemiptera G. Heiden & A.A. Schneid.	Baccharis	hemiptera	G. Heiden & A.A. Schneid.	Candollea	66(2)	338		2011					R											Endemic
Asteroideae	Astereae	Baccharis hieronymi Heering	Baccharis	hieronymi	Heering	Mitt. Staatsinst. Allg. Bot. Hamburg	21(34)	3		1904	Baccharis spicata Hieron.	Baccharis spicata Hieron.						R								Endemic	Vulnerable
Asteroideae	Astereae	Baccharis hirta DC.	Baccharis	hirta	DC.	Prodr. [A. P. de Candolle]	5	405		1836					R									R		Native
Asteroideae	Astereae	Baccharis huairacajensis Hieron.	Baccharis	huairacajensis	Hieron.	Bot. Jahrb. Syst.	28(5)	589		1901								R								Endemic	Near Threatened
Asteroideae	Astereae	Baccharis humilis Sch. Bip. ex Baker	Baccharis	humilis	Sch. Bip. ex Baker	Fl. Bras.	6(3)	92		1882					R											Endemic
Asteroideae	Astereae	Baccharis hutchisonii Cuatrec.	Baccharis	hutchisonii	Cuatrec.	Caldasia	10(46)	25		1967												R				Endemic
Asteroideae	Astereae	Baccharis hyemalis Deble	Baccharis	hyemalis	Deble	Balduinia	9	20		2006					R											Endemic
Asteroideae	Astereae	Baccharis hypericifolia Baker	Baccharis	hypericifolia	Baker	Fl. Bras.	6(3)	69		1882					R											Endemic
Asteroideae	Astereae	Baccharis illinita DC.	Baccharis	illinita	DC.	Prodr. [A. P. de Candolle]	5	412		1836					R											Endemic
Asteroideae	Astereae	Baccharis illinitoides Malag.	Baccharis	illinitoides	Malag.	Mem. Soc. Ci. Nat. La Salle	37(107)	138		1977					R						R					Native
Asteroideae	Astereae	Baccharis imbricata Malag.	Baccharis	imbricata	Malag.	Contr. Inst. Geobiol. La Salle Canoas	8	38		1957					R											Endemic
Asteroideae	Astereae	Baccharis incarum (Wedd.) Cuatrec.	Baccharis	incarum	(Wedd.) Cuatrec.	Phytologia	9(1)	7		1963						R										Endemic
Asteroideae	Astereae	Baccharis incisa Hook. & Arn.	Baccharis	incisa	Hook. & Arn.	J. Bot. (Hooker)	3(17)	39		1840					R									R		Native
Asteroideae	Astereae	Baccharis inexspectata Deble & A.S. Oliveira	Baccharis	inexspectata	Deble & A.S. Oliveira	Bonplandia (Corrientes)	17(1)	16		2008					R											Endemic
Asteroideae	Astereae	Baccharis intermixta Gardner	Baccharis	intermixta	Gardner	London J. Bot.	7	84		1848					R											Endemic
Asteroideae	Astereae	Baccharis isabelae Soria & Zardini	Baccharis	isabelae	Soria & Zardini	Candollea	46(2)	537	f. 2	1991											R					Endemic
Asteroideae	Astereae	Baccharis itapirocensis A.S. Oliveira & Deble	Baccharis	itapirocensis	A.S. Oliveira & Deble	Bonplandia (Corrientes)	20(1)	25		2011					R											Endemic
Asteroideae	Astereae	Baccharis itatiaiae Wawra	Baccharis	itatiaiae	Wawra	Itin. Princ. S. Coburgi	2	28		1888					R											Endemic
Asteroideae	Astereae	Baccharis jelskii Hieron.	Baccharis	jelskii	Hieron.	Bot. Jahrb. Syst.	29(1)	24		1900	Baccharis decussata subsp. jelskii (Hieron.) Joch. Müll.						R	R				R				Native
Asteroideae	Astereae	Baccharis jocheniana G. Heiden & Macias	Baccharis	jocheniana	G. Heiden & Macias	Novon	18(2)	178	f. 1	2008					R											Endemic
Asteroideae	Astereae	Baccharis johnwurdackiana H. Rob.	Baccharis	johnwurdackiana	H. Rob.	BioLlania (Ed. Espec.)	6	506		1997												R				Endemic
Asteroideae	Astereae	Baccharis juncea (Cass.) Desf.	Baccharis	juncea	(Cass.) Desf.	Tabl. École Bot., ed. 3 (Cat. Pl. Horti Paris.)		163		1829	Arrhenachne juncea (Lehm.) Cass.	Baccharis subulata D. Don ex Hook. & Arn.	R	R		R								R		Native
Asteroideae	Astereae	Baccharis junciformis DC.	Baccharis	junciformis	DC.	Prodr. [A. P. de Candolle]	5	426		1836					R									R		Native
Asteroideae	Astereae	Baccharis kingii Cuatrec.	Baccharis	kingii	Cuatrec.	Phytologia	52(3)	166		1982												R				Endemic
Asteroideae	Astereae	Baccharis klattii Benoist	Baccharis	klattii	Benoist	Bull. Soc. Bot. France	91	192		1944	Baccharis polyphylla Klatt	Baccharis polyphylla Klatt						R								Endemic	Near Threatened
Asteroideae	Astereae	Baccharis kurtziana Ariza	Baccharis	kurtziana	Ariza	Kurtziana	6	69		1971			R													Endemic
Asteroideae	Astereae	Baccharis lapidosa Deble & A.S. Oliveira	Baccharis	lapidosa	Deble & A.S. Oliveira	Bonplandia (Corrientes)	20(1)	33		2011				R												Endemic
Asteroideae	Astereae	Baccharis lateralis Baker	Baccharis	lateralis	Baker	Fl. Bras.	6(3)	100		1882					R											Endemic
Asteroideae	Astereae	Baccharis latifolia (Ruiz & Pav.) Pers.	Baccharis	latifolia	(Ruiz & Pav.) Pers.	Syn. Pl. [Persoon]	2(2)	424		1807	Molina latifolia Ruiz & Pav., Pingraea latifolia (Ruiz & Pav.) F.H. Hellw.	Baccharis floribunda Kunth	R	R			R	R				R			R	Native	Least Concern
Asteroideae	Astereae	Baccharis ledifolia Kunth	Baccharis	ledifolia	Kunth	Nov. Gen. Sp. (folio ed.)	4(14)	39		1820[1818]												R				Endemic
Asteroideae	Astereae	Baccharis lehmannii Klatt	Baccharis	lehmannii	Klatt	Bot. Jahrb. Syst.	8(1)	39		1886							R	R								Native
Asteroideae	Astereae	Baccharis leptophylla DC.	Baccharis	leptophylla	DC.	Prodr. [A. P. de Candolle]	5	423		1836														R		Endemic
Asteroideae	Astereae	Baccharis leucocephala Dusén	Baccharis	leucocephala	Dusén	Ark. Bot.	9(15)	24		1910					R											Endemic
Asteroideae	Astereae	Baccharis leucopappa DC.	Baccharis	leucopappa	DC.	Prodr. [A. P. de Candolle]	5	415		1836					R											Endemic
Asteroideae	Astereae	Baccharis lewisii (H. Rob.) Joch. Müll.	Baccharis	lewisii	(H. Rob.) Joch. Müll.	Syst. Bot. Monogr.	76	186		2006				R												Endemic
Asteroideae	Astereae	Baccharis libertadensis (S.B. Jones) H. Rob.	Baccharis	libertadensis	(S.B. Jones) H. Rob.	Phytologia	65(1)	37		1988												R				Endemic
Asteroideae	Astereae	Baccharis ligustrina DC.	Baccharis	ligustrina	DC.	Prodr. [A. P. de Candolle]	5	421		1836					R										R	Native
Asteroideae	Astereae	Baccharis lilloi Heering	Baccharis	lilloi	Heering	Jahrb. Hamburg. Wiss. Anst.	31(3)	78		1914			R	R												Native
Asteroideae	Astereae	Baccharis linearifolia (Lam.) Pers.	Baccharis	linearifolia	(Lam.) Pers.	Syn. Pl. [Persoon]	2(2)	425		1807			R	R	R						R					Native
Asteroideae	Astereae	Baccharis linearis (Ruiz & Pav.) Pers.	Baccharis	linearis	(Ruiz & Pav.) Pers.	Syn. Pl. [Persoon]	2(2)	425		1807			R			R										Native
Asteroideae	Astereae	Baccharis longiattenuata A.S. Oliveira	Baccharis	longiattenuata	A.S. Oliveira	Balduinia	9	5	f. 2	2006					R											Endemic
Asteroideae	Astereae	Baccharis lychnophora Gardner	Baccharis	lychnophora	Gardner	London J. Bot.	7	85		1848					R											Endemic
Asteroideae	Astereae	Baccharis lycioides J. Rémy	Baccharis	lycioides	J. Rémy	Fl. Chil.	4(1)	99		1849						R										Endemic
Asteroideae	Astereae	Baccharis lymanii G.M. Barroso ex G. Heiden	Baccharis	lymanii	G.M. Barroso ex G. Heiden	Rodriguésia	28(40)	165		1976					R											Endemic
Asteroideae	Astereae	Baccharis macraei Hook. & Arn.	Baccharis	macraei	Hook. & Arn.	J. Bot. (Hooker)	3(17)	32		1840						R						R				Native
Asteroideae	Astereae	Baccharis macrantha Kunth	Baccharis	macrantha	Kunth	Nov. Gen. Sp. (folio ed.)	4(14)	42		1820[1818]							R	R								Native
Asteroideae	Astereae	Baccharis macrophylla Dusén	Baccharis	macrophylla	Dusén	Arq. Mus. Nac. Rio de Janeiro	13	14		1905					R											Endemic
Asteroideae	Astereae	Baccharis magellanica (Lam.) Pers.	Baccharis	magellanica	(Lam.) Pers.	Syn. Pl. [Persoon]	2(2)	424		1807			R			R										Native
Asteroideae	Astereae	Baccharis magnifica G. Heiden, Leoni & J.N. Nakaj.	Baccharis	magnifica	G. Heiden, Leoni & J.N. Nakaj.	Phytotaxa	162(4)	212		2014					R											Endemic
Asteroideae	Astereae	Baccharis maguireana Malag.	Baccharis	maguireana	Malag.	Mem. Soc. Ci. Nat. La Salle	37(107)	138		1977															D	Endemic
Asteroideae	Astereae	Baccharis malmei Joch. Müll.	Baccharis	malmei	Joch. Müll.	Ann. Bot. Fenn.	43(6)	472	f. 1	2006					R											Endemic
Asteroideae	Astereae	Baccharis mandonii Sch. Bip. ex Klatt	Baccharis	mandonii	Sch. Bip. ex Klatt	Leopoldina	25	108		1889				R												Endemic
Asteroideae	Astereae	Baccharis marcetiifolia Benth.	Baccharis	marcetiifolia	Benth.	Pl. Hartw.		202		1845	Neomolina marcetiifolia (Benth.) F.H. Hellw.	Neomolina marcetiifolia (Benth.) F.H. Hellw.						R								Endemic
Asteroideae	Astereae	Baccharis maritima Baker	Baccharis	maritima	Baker	Fl. Bras.	6(3)	72		1882					R											Endemic
Asteroideae	Astereae	Baccharis maxima Baker	Baccharis	maxima	Baker	Fl. Bras.	6(3)	80		1882					R											Endemic
Asteroideae	Astereae	Baccharis megapotamica Spreng.	Baccharis	megapotamica	Spreng.	Syst. Veg. [Sprengel]	3	461		1826			R		R						R			R		Native
Asteroideae	Astereae	Baccharis melanopotamica Speg.	Baccharis	melanopotamica	Speg.	Anales Soc. Ci. Argent.	48	189		1899		Baccharis dusenii O. Hoffm	R													Endemic
Asteroideae	Astereae	Baccharis meridensis Steyerm.	Baccharis	meridensis	Steyerm.	Fieldiana, Bot.	28(3)	622		1953															D	Endemic
Asteroideae	Astereae	Baccharis mesoneura DC.	Baccharis	mesoneura	DC.	Prodr. [A. P. de Candolle]	5	412		1836					R											Endemic
Asteroideae	Astereae	Baccharis microcephala (Less.) DC.	Baccharis	microcephala	(Less.) DC.	Prodr. [A. P. de Candolle]	5	425		1836			R		R						R			R		Native
Asteroideae	Astereae	Baccharis microdonta DC.	Baccharis	microdonta	DC.	Prodr. [A. P. de Candolle]	5	416		1836		Baccharis refracta Burch. ex Baker	R	R	R									R		Native
Asteroideae	Astereae	Baccharis milleflora (Less.) DC.	Baccharis	milleflora	(Less.) DC.	Prodr. [A. P. de Candolle]	5	426		1836	Molina milleflora Less.				R											Endemic
Asteroideae	Astereae	Baccharis minor (F.H. Hellw.) G. Heiden	Baccharis	minor	(F.H. Hellw.) G. Heiden	Phytotaxa	459(1)	84		2020						R										Endemic
Asteroideae	Astereae	Baccharis minutiflora Mart. ex Baker	Baccharis	minutiflora	Mart. ex Baker	Fl. Bras.	6(3)	69		1882					R											Endemic
Asteroideae	Astereae	Baccharis mollis Kunth	Baccharis	mollis	Kunth	Nov. Gen. Sp. (folio ed.)	4(14)	46		1820[1818]								R								Endemic
Asteroideae	Astereae	Baccharis montana DC.	Baccharis	montana	DC.	Prodr. [A. P. de Candolle]	5	404		1836		Baccharis elaeagnoides Steud. ex Baker	R		R						R					Native
Asteroideae	Astereae	Baccharis multiflosculosa Heering	Baccharis	multiflosculosa	Heering	Jahrb. Hamburg. Wiss. Anst.	31(3)	79		1914			R	R												Native
Asteroideae	Astereae	Baccharis multifolia A.S. Oliveira, Deble & Marchiori	Baccharis	multifolia	A.S. Oliveira, Deble & Marchiori	Balduinia	7	17		2006					R											Endemic
Asteroideae	Astereae	Baccharis mutisiana Cuatrec.	Baccharis	mutisiana	Cuatrec.	Mutisia	17	8		1953							R								R	Native
Asteroideae	Astereae	Baccharis mylodontis F.H. Hellw.	Baccharis	mylodontis	F.H. Hellw.	Mitt. Bot. Staatssamml. München	29	195		1990						R										Endemic
Asteroideae	Astereae	Baccharis myricifolia DC.	Baccharis	myricifolia	DC.	Prodr. [A. P. de Candolle]	5	405		1836					R											Endemic
Asteroideae	Astereae	Baccharis myriocephala DC.	Baccharis	myriocephala	DC.	Prodr. [A. P. de Candolle]	5	426		1836					R						R			R		Native
Asteroideae	Astereae	Baccharis napaea G. Heiden	Baccharis	napaea	G. Heiden	Phytotaxa	66	50	f. 1a–m, 2	2012					R											Endemic
Asteroideae	Astereae	Baccharis neaei DC.	Baccharis	neaei	DC.	Prodr. [A. P. de Candolle]	5	411		1836		Baccharis rhetinodes Meyen & Walp	R			R										Native
Asteroideae	Astereae	Baccharis nebularis G. Heiden	Baccharis	nebularis	G. Heiden	Phytotaxa	177(2)	126		2014					R											Endemic
Asteroideae	Astereae	Baccharis neorupestris Deble & A.S. Oliveira	Baccharis	neorupestris	Deble & A.S. Oliveira	Bonplandia (Corrientes)	20(1)	32		2011		Baccharis rupestris Heering; nom. Illeg., non (L.) Desf., 1804 (=Conyza rupestris L.) Illeg	R													Endemic
Asteroideae	Astereae	Baccharis neotruncata (Phil.) G. Heiden	Baccharis	neotruncata	(Phil.) G. Heiden	Phytotaxa	459(1)	82		2020						R										Endemic
Asteroideae	Astereae	Baccharis niederleinii Heering	Baccharis	niederleinii	Heering	Jahrb. Hamburg. Wiss. Anst.	31(3)	164		1914			R													Endemic
Asteroideae	Astereae	Baccharis nitida (Ruiz & Pav.) Pers.	Baccharis	nitida	(Ruiz & Pav.) Pers.	Syn. Pl. [Persoon]	2(2)	425		1807	Molina nitida Ruiz & Pav.	Baccharis prinoides Kunth	R	R			R	R		R		R			R	Native	Least Concern
Asteroideae	Astereae	Baccharis nivalis (Wedd.) Sch. Bip. ex Phil.	Baccharis	nivalis	(Wedd.) Sch. Bip. ex Phil.	Anales Univ. Chile	87	705		1894	Heterothalamus nivalis Wedd.		R			R										Native
Asteroideae	Astereae	Baccharis notosergila Griseb.	Baccharis	notosergila	Griseb.	Abh. Königl. Ges. Wiss. Göttingen	24	183		1879		Baccharis curtifolia S. Moore	R		R						R			R		Native
Asteroideae	Astereae	Baccharis nummularia Heering ex Malme	Baccharis	nummularia	Heering ex Malme	Kongl. Svenska Vetensk. Acad. Handl., n.f.,	12(2)	68		1933					R											Endemic
Asteroideae	Astereae	Baccharis obdeltata G. Heiden	Baccharis	obdeltata	G. Heiden	Phytotaxa	164(2)	142		2014					R											Endemic
Asteroideae	Astereae	Baccharis oblongifolia (Ruiz & Pav.) Pers.	Baccharis	oblongifolia	(Ruiz & Pav.) Pers.	Syn. Pl. [Persoon]	2(2)	424		1807	Molina oblongifolia Ruiz & Pav.	Baccharis brachylaenoides DC., Baccharis maguireana Malag.		R	R		R	R				R			R	Native
Asteroideae	Astereae	Baccharis obovata Hook. & Arn.	Baccharis	obovata	Hook. & Arn.	Bot. Beechey Voy.		30		1830		Baccharis umbelliformis DC	R			R										Native
Asteroideae	Astereae	Baccharis obtusifolia Kunth	Baccharis	obtusifolia	Kunth	Nov. Gen. Sp. (folio ed.)	4(14)	40		1820[1818]								R				R				Native
Asteroideae	Astereae	Baccharis ocellata Phil.	Baccharis	ocellata	Phil.	Anales Univ. Chile	87	705		1894						R										Endemic
Asteroideae	Astereae	Baccharis ochracea Spreng.	Baccharis	ochracea	Spreng.	Syst. Veg. [Sprengel]	3	460		1826		Baccharis velutina DC	R		R									R		Native
Asteroideae	Astereae	Baccharis odorata Kunth	Baccharis	odorata	Kunth	Nov. Gen. Sp. (folio ed.)	4(14)	40		1820[1818]							R	R				R				Native
Asteroideae	Astereae	Baccharis opuntioides Mart. ex Baker	Baccharis	opuntioides	Mart. ex Baker	Fl. Bras.	6(3)	39		1882					R											Endemic
Asteroideae	Astereae	Baccharis orbiculata Deble & A.S. Oliveira	Baccharis	orbiculata	Deble & A.S. Oliveira	Bonplandia (Corrientes)	18(1)	48		2009					R											Endemic
Asteroideae	Astereae	Baccharis orbignyana Klatt	Baccharis	orbignyana	Klatt	Abh. Naturf. Ges. Halle	15(2)	327		1881[1882]				R	R											Native
Asteroideae	Astereae	Baccharis oreophila Malme	Baccharis	oreophila	Malme	Kongl. Svenska Vetensk. Acad. Handl., n.f.,	12(2)	75		1933					R											Endemic	Least Concern
Asteroideae	Astereae	Baccharis organensis Baker	Baccharis	organensis	Baker	Fl. Bras.	6(3)	74		1882					R											Endemic
Asteroideae	Astereae	Baccharis oxyodonta DC.	Baccharis	oxyodonta	DC.	Prodr. [A. P. de Candolle]	5	404		1836		Baccharis triplinervia DC	R		R						R			R		Native
Asteroideae	Astereae	Baccharis oxyphylla DC.	Baccharis	oxyphylla	DC.	Prodr. [A. P. de Candolle]	5	400		1836												R				Endemic
Asteroideae	Astereae	Baccharis pachycephala Hieron.	Baccharis	pachycephala	Hieron.	Bot. Jahrb. Syst.	36(5)	480		1905												R				Endemic
Asteroideae	Astereae	Baccharis padifolia Hieron.	Baccharis	padifolia	Hieron.	Bot. Jahrb. Syst.	29(1)	26		1900							R	R								Native
Asteroideae	Astereae	Baccharis palenae Phil.	Baccharis	palenae	Phil.	Anales Univ. Chile	87	708		1894						R										Endemic
Asteroideae	Astereae	Baccharis palustris Heering	Baccharis	palustris	Heering	Jahrb. Hamburg. Wiss. Anst.	21(3)	38		1904					R											Endemic
Asteroideae	Astereae	Baccharis pampeana A.S. Oliveira, Deble & Marchiori	Baccharis	pampeana	A.S. Oliveira, Deble & Marchiori	Balduinia	8	17		2006					R											Endemic
Asteroideae	Astereae	Baccharis paniculata DC.	Baccharis	paniculata	DC.	Prodr. [A. P. de Candolle]	5	420		1836						R										Endemic
Asteroideae	Astereae	Baccharis papillosa Rusby	Baccharis	papillosa	Rusby	Bull. New York Bot. Gard.	8(28)	129		1912				R												Endemic	Least Concern
Asteroideae	Astereae	Baccharis paramicola Cuatrec.	Baccharis	paramicola	Cuatrec.	Mutisia	17	9		1953							R									Endemic
Asteroideae	Astereae	Baccharis paranensis Heering & Dusén	Baccharis	paranensis	Heering & Dusén	Ark. Bot.	9(15)	29	pl. 1	1910					R											Endemic
Asteroideae	Astereae	Baccharis parvidentata Malag.	Baccharis	parvidentata	Malag.	Mem. Soc. Ci. Nat. La Salle	37(107)	138		1977					R											Endemic
Asteroideae	Astereae	Baccharis patagonica Hook. & Arn.	Baccharis	patagonica	Hook. & Arn.	J. Bot. (Hooker)	3(17)	29		1840			R			R										Native
Asteroideae	Astereae	Baccharis patens Baker	Baccharis	patens	Baker	Fl. Bras.	6(3)	52		1882					R									R		Native
Asteroideae	Astereae	Baccharis patiensis Hieron.	Baccharis	patiensis	Hieron.	Bot. Jahrb. Syst.	21(3)	345		1896												R				Endemic
Asteroideae	Astereae	Baccharis paucicostata Joch. Müll. & Giuliano	Baccharis	paucicostata	Joch. Müll. & Giuliano	Nordic J. Bot.	32(5)	543		2014			R													Endemic
Asteroideae	Astereae	Baccharis pauciflosculosa DC.	Baccharis	pauciflosculosa	DC.	Prodr. [A. P. de Candolle]	5	413		1836					R											Endemic
Asteroideae	Astereae	Baccharis pedersenii Cabrera	Baccharis	pedersenii	Cabrera	Darwiniana	16(1-2)	410		1970			R		R						R					Native
Asteroideae	Astereae	Baccharis pedunculata (Mill.) Cabrera	Baccharis	pedunculata	(Mill.) Cabrera	Bol. Soc. Argent. Bot.	7(3-4)	240		1959	Conyza pedunculata Mill.			R			R	R				R			R	Native
Asteroideae	Astereae	Baccharis pellucida Hieron.	Baccharis	pellucida	Hieron.	Bot. Jahrb. Syst.	36(5)	482		1905												R				Endemic
Asteroideae	Astereae	Baccharis penningtonii Heering	Baccharis	penningtonii	Heering	Jahrb. Hamburg. Wiss. Anst.	31(3)	119		1914			R		R									R		Native
Asteroideae	Astereae	Baccharis pentlandii DC.	Baccharis	pentlandii	DC.	Prodr. [A. P. de Candolle]	5	416		1836				R			R					R				Native
Asteroideae	Astereae	Baccharis pentodonta Malme	Baccharis	pentodonta	Malme	Kongl. Svenska Vetensk. Acad. Handl., n.f.,	32(5)	52	pl. 4, f. 12	1899					R						R					Native
Asteroideae	Astereae	Baccharis perlata Sch. Bip. ex Baker	Baccharis	perlata	Sch. Bip. ex Baker	Fl. Bras.	6(3)	62		1882					R											Endemic
Asteroideae	Astereae	Baccharis perulata Kuntze	Baccharis	perulata	Kuntze	Revis. Gen. Pl.	3(3)	133		1898			R													Endemic
Asteroideae	Astereae	Baccharis peruviana Cuatrec.	Baccharis	peruviana	Cuatrec.	Caldasia	10(46)	23		1967												R				Endemic
Asteroideae	Astereae	Baccharis petiolata DC.	Baccharis	petiolata	DC.	Prodr. [A. P. de Candolle]	5	418		1836												R				Endemic
Asteroideae	Astereae	Baccharis petraea Heering	Baccharis	petraea	Heering	Jahrb. Hamburg. Wiss. Anst.	21(3)	30		1904			R		R						R			R		Native
Asteroideae	Astereae	Baccharis petrophila R.E. Fr.	Baccharis	petrophila	R.E. Fr.	Nova Acta Regiae Soc. Sci. Upsal. ser. 4,	1(1)	81		1905			R													Endemic
Asteroideae	Astereae	Baccharis phylicifolia DC.	Baccharis	phylicifolia	DC.	Prodr. [A. P. de Candolle]	5	415		1836					R											Endemic
Asteroideae	Astereae	Baccharis phylicoides Kunth	Baccharis	phylicoides	Kunth	Nov. Gen. Sp. (folio ed.)	4(14)	39		1820[1818]				R				R				R				Native
Asteroideae	Astereae	Baccharis phyteuma Heering	Baccharis	phyteuma	Heering	Jahrb. Hamburg. Wiss. Anst.	31(3)	128		1914			R													Endemic
Asteroideae	Astereae	Baccharis phyteumoides (Less.) DC.	Baccharis	phyteumoides	(Less.) DC.	Prodr. [A. P. de Candolle]	5	425		1836			R		R						R			R		Native
Asteroideae	Astereae	Baccharis pilcensis F.H. Hellw.	Baccharis	pilcensis	F.H. Hellw.	Mitt. Bot. Staatssamml. München	29	259		1990						R										Endemic
Asteroideae	Astereae	Baccharis pingraea DC.	Baccharis	pingraea	DC.	Prodr. [A. P. de Candolle]	5	420		1836					R	R								R		Native
Asteroideae	Astereae	Baccharis platypoda DC.	Baccharis	platypoda	DC.	Prodr. [A. P. de Candolle]	5	409		1836				R	R											Native
Asteroideae	Astereae	Baccharis pluricapitulata (Deble) G. Heiden	Baccharis	pluricapitulata	(Deble) G. Heiden	Phytoneuron	2013–78	2		2013					R											Endemic
Asteroideae	Astereae	Baccharis poeppigiana DC.	Baccharis	poeppigiana	DC.	Prodr. [A. P. de Candolle]	5	410		1836			R			R										Native
Asteroideae	Astereae	Baccharis pohlii (Baker) Deble & A.S. Oliveira	Baccharis	pohlii	(Baker) Deble & A.S. Oliveira	Balduinia	9	23		2006					R											Endemic
Asteroideae	Astereae	Baccharis polifolia Griseb.	Baccharis	polifolia	Griseb.	Abh. Königl. Ges. Wiss. Göttingen	19	176		1874			R	R												Native
Asteroideae	Astereae	Baccharis polygama Ariza	Baccharis	polygama	Ariza	Kurtziana	9	83		1976			R													Endemic
Asteroideae	Astereae	Baccharis polygona Baker	Baccharis	polygona	Baker	Fl. Bras.	6(3)	46		1882					R											Endemic
Asteroideae	Astereae	Baccharis polyphylla Gardner	Baccharis	polyphylla	Gardner	London J. Bot.	7	87		1848					R											Endemic
Asteroideae	Astereae	Baccharis potosiensis H. Rob.	Baccharis	potosiensis	H. Rob.	BioLlania (Ed. Espec.)	6	504		1997				R												Endemic
Asteroideae	Astereae	Baccharis prunifolia Kunth	Baccharis	prunifolia	Kunth	Nov. Gen. Sp. (folio ed.)	4(14)	49		1820[1818]							R	R				R			R	Native
Asteroideae	Astereae	Baccharis pseudoalpestris Malag.	Baccharis	pseudoalpestris	Malag.	Contr. Inst. Geobiol. La Salle Canoas	2	46		1952					R											Endemic
Asteroideae	Astereae	Baccharis pseudomyriocephala Malag.	Baccharis	pseudomyriocephala	Malag.	Contr. Inst. Geobiol. La Salle Canoas	2	46		1952					R											Endemic
Asteroideae	Astereae	Baccharis pseudovaccinioides Malag.	Baccharis	pseudovaccinioides	Malag.	Contr. Inst. Geobiol. La Salle Canoas	2	47		1952					R											Endemic
Asteroideae	Astereae	Baccharis psiadioides (Less.) Joch. Müll.	Baccharis	psiadioides	(Less.) Joch. Müll.	Syst. Bot. Monogr.	76	306		2006					R									R		Native
Asteroideae	Astereae	Baccharis pulchella Sch. Bip. ex Griseb.	Baccharis	pulchella	Sch. Bip. ex Griseb.	Abh. Königl. Ges. Wiss. Göttingen	24	181		1879			R									R				Native
Asteroideae	Astereae	Baccharis pululahuensis Hieron.	Baccharis	pululahuensis	Hieron.	Bot. Jahrb. Syst.	29(1)	23		1900							R	R								Native
Asteroideae	Astereae	Baccharis pulverulenta Klatt	Baccharis	pulverulenta	Klatt	Abh. Naturf. Ges. Halle	15(2)	327		1881[1882]												R				Endemic
Asteroideae	Astereae	Baccharis pumila Joch. Müll.	Baccharis	pumila	Joch. Müll.	Syst. Bot. Monogr.	76	124		2006				R												Endemic
Asteroideae	Astereae	Baccharis punctulata DC.	Baccharis	punctulata	DC.	Prodr. [A. P. de Candolle]	5	405		1836		Baccharis melastomifolia Hook. & Arn	R	R	R						R			R		Native	Least Concern
Asteroideae	Astereae	Baccharis pycnantha Phil.	Baccharis	pycnantha	Phil.	Anales Univ. Chile	87	701		1894						R										Endemic
Asteroideae	Astereae	Baccharis pycnocephala (F.H. Hellw.) G. Heiden	Baccharis	pycnocephala	(F.H. Hellw.) G. Heiden	Phytotaxa	459(1)	84		2020						R										Endemic
Asteroideae	Astereae	Baccharis quitensis Kunth	Baccharis	quitensis	Kunth	Nov. Gen. Sp. (folio ed.)	4(14)	44		1820[1818]		Baccharis flexuosa Baker	R	R	R			R				R				Native
Asteroideae	Astereae	Baccharis racemosa (Ruiz & Pav.) DC.	Baccharis	racemosa	(Ruiz & Pav.) DC.	Prodr. [A. P. de Candolle]	5	401		1836	Molina racemosa Ruiz & Pav.	Baccharis rigida Hook. & Arn	R			R										Native
Asteroideae	Astereae	Baccharis radin Phil.	Baccharis	radin	Phil.	Linnaea	33(2)	146		1864												R				Endemic
Asteroideae	Astereae	Baccharis ramboi G. Heiden & Macias	Baccharis	ramboi	G. Heiden & Macias	Novon	18(2)	180	f. 2	2008					R											Endemic
Asteroideae	Astereae	Baccharis raulii S. Díaz & Cuatrec.	Baccharis	raulii	S. Díaz & Cuatrec.	Revista Acad. Colomb. Ci. Exact.	18(69)	128		1991							R									Endemic
Asteroideae	Astereae	Baccharis regnellii Sch. Bip. ex Baker	Baccharis	regnellii	Sch. Bip. ex Baker	Linnaea	22(5)	571		1849					R											Endemic
Asteroideae	Astereae	Baccharis retamoides Phil.	Baccharis	retamoides	Phil.	Anales Univ. Chile	34	180		1870			R													Endemic
Asteroideae	Astereae	Baccharis reticularia DC.	Baccharis	reticularia	DC.	Prodr. [A. P. de Candolle]	5	409		1836					R											Endemic
Asteroideae	Astereae	Baccharis reticularioides Deble & A.S. Oliveira	Baccharis	reticularioides	Deble & A.S. Oliveira	Bonplandia (Corrientes)	20(1)	28		2011					R											Endemic
Asteroideae	Astereae	Baccharis reticulata (Ruiz & Pav.) Pers.	Baccharis	reticulata	(Ruiz & Pav.) Pers.	Syn. Pl. [Persoon]	2(2)	425		1807	Molina reticulata Ruiz & Pav., Loricaria reticulosa (Ruiz & Pav.) Kuntze											R				Endemic
Asteroideae	Astereae	Baccharis retusa DC.	Baccharis	retusa	DC.	Prodr. [A. P. de Candolle]	5	412		1836					R						R					Native
Asteroideae	Astereae	Baccharis revoluta Kunth	Baccharis	revoluta	Kunth	Nov. Gen. Sp. (folio ed.)	4(14)	39		1820[1818]							R					R				Native
Asteroideae	Astereae	Baccharis rhexioides Kunth	Baccharis	rhexioides	Kunth	Nov. Gen. Sp. (folio ed.)	4(14)	52		1820[1818]		Baccharis venusta Kunth	R								R	R				Native
Asteroideae	Astereae	Baccharis rhomboidalis J. Rémy	Baccharis	rhomboidalis	J. Rémy	Fl. Chil.	4(1)	99		1849			R			R										Native
Asteroideae	Astereae	Baccharis riograndensis Malag. & J. Vidal	Baccharis	riograndensis	Malag. & J. Vidal	Bol. Inform. Inst. Geobiol. La Salle	1	13		1949					R											Endemic
Asteroideae	Astereae	Baccharis rivularis Gardner	Baccharis	rivularis	Gardner	London J. Bot.	7	83		1848					R											Endemic
Asteroideae	Astereae	Baccharis rodriguezii Ariza	Baccharis	rodriguezii	Ariza	Kurtziana	7	190		1973			R													Endemic
Asteroideae	Astereae	Baccharis rufescens Spreng.	Baccharis	rufescens	Spreng.	Syst. Veg. [Sprengel]	3	464		1826										R				R	R	Native
Asteroideae	Astereae	Baccharis rufidula (Spreng.) Joch. Müll.	Baccharis	rufidula	(Spreng.) Joch. Müll.	Syst. Bot. Monogr.	76	306		2006					R							R				Native
Asteroideae	Astereae	Baccharis rupicola Kunth	Baccharis	rupicola	Kunth	Nov. Gen. Sp. (folio ed.)	4(14)	41		1820[1818]							R									Endemic
Asteroideae	Astereae	Baccharis sagittalis (Less.) DC.	Baccharis	sagittalis	(Less.) DC.	Prodr. [A. P. de Candolle]	5	425		1836	Molina sagittalis Less., Pingraea sagittalis (Less.) F.H. Hellw.	Baccharis chubutensis Speg	R	R	R	R										Native
Asteroideae	Astereae	Baccharis salicifolia (Ruiz & Pav.) Pers.	Baccharis	salicifolia	(Ruiz & Pav.) Pers.	Syn. Pl. [Persoon]	2(2)	425		1807	Molina salicifolia Ruiz & Pav., Pingraea salicifolia (Ruiz & Pav.) F.H. Hellw.	Baccharis iresinoides Kunth; Baccharis confertifolia Colla	R	R	R	R	R	R			R	R		R	R	Native	Least Concern
Asteroideae	Astereae	Baccharis saliens Rusby	Baccharis	saliens	Rusby	Bull. New York Bot. Gard.	4(14)	387		1907				R												Endemic
Asteroideae	Astereae	Baccharis samensis Joch. Müll.	Baccharis	samensis	Joch. Müll.	Syst. Bot. Monogr.	76	121		2006			R	R												Native
Asteroideae	Astereae	Baccharis santelicis Phil.	Baccharis	santelicis	Phil.	Anales Mus. Nac., Santiago de Chile, secc. 2, bot.	8	39		1891						R										Endemic
Asteroideae	Astereae	Baccharis santiagensis Heering ex Reiche	Baccharis	santiagensis	Heering ex Reiche	Anales Univ. Chile	111	176		1902			R													Endemic
Asteroideae	Astereae	Baccharis scabra Pers.	Baccharis	scabra	Pers.	Syn. Pl. [Persoon]	2(2)	425		1807												R				Endemic
Asteroideae	Astereae	Baccharis scabrifolia G. Heiden	Baccharis	scabrifolia	G. Heiden	Bradea	13(2)	6		2008					R											Endemic
Asteroideae	Astereae	Baccharis scandens (Ruiz & Pav.) Pers.	Baccharis	scandens	(Ruiz & Pav.) Pers.	Syn. Pl. [Persoon]	2(2)	424		1807						R						R				Native
Asteroideae	Astereae	Baccharis schomburgkii Baker	Baccharis	schomburgkii	Baker	Fl. Bras.	6(3)	89		1882										R					R	Native
Asteroideae	Astereae	Baccharis scopulorum A.A. Schneid. & G. Heiden	Baccharis	scopulorum	A.A. Schneid. & G. Heiden	Phytotaxa	15	10		2011					R											Endemic
Asteroideae	Astereae	Baccharis sculpta Griseb.	Baccharis	sculpta	Griseb.	Abh. Königl. Ges. Wiss. Göttingen	19	175		1874		Pluchea montana Griseb	R													Endemic
Asteroideae	Astereae	Baccharis semiserrata DC.	Baccharis	semiserrata	DC.	Prodr. [A. P. de Candolle]	5	404		1836			R		R						R					Native
Asteroideae	Astereae	Baccharis serranoi H. Rob.	Baccharis	serranoi	H. Rob.	BioLlania (Ed. Espec.)	6	505		1997				R												Endemic
Asteroideae	Astereae	Baccharis serrula Sch. Bip. ex Baker	Baccharis	serrula	Sch. Bip. ex Baker	Fl. Bras.	6(3)	70		1882					R											Endemic
Asteroideae	Astereae	Baccharis serrulata (Lam.) Pers.	Baccharis	serrulata	(Lam.) Pers.	Syn. Pl. [Persoon]	2(2)	423		1807	Conyza serrulata Lam.	Baccharis lundii var. punctigera (DC.) Baker, Baccharis lundi			R										R	Native
Asteroideae	Astereae	Baccharis sessiliflora Vahl	Baccharis	sessiliflora	Vahl	Symb. Bot. (Vahl)	3	97		1794		Baccharis rotundifolia Spreng	R	R	R						R			R		Native
Asteroideae	Astereae	Baccharis simplex G. Heiden	Baccharis	simplex	G. Heiden	Phytotaxa	164(4)	144		2014					R											Endemic
Asteroideae	Astereae	Baccharis singularis (Vell.) G.M. Barroso	Baccharis	singularis	(Vell.) G.M. Barroso	Rodriguésia	28(40)	96		1976					R											Endemic
Asteroideae	Astereae	Baccharis sinuata Kunth	Baccharis	sinuata	Kunth	Nov. Gen. Sp. (folio ed.)	4(14)	42		1820[1818]												R				Endemic
Asteroideae	Astereae	Baccharis solomonii H. Rob.	Baccharis	solomonii	H. Rob.	Phytologia	65(1)	40		1988												R				Endemic
Asteroideae	Astereae	Baccharis spartea Benth.	Baccharis	spartea	Benth.	Bot. Voy. Sulphur [Bentham]		114		1844[1845]												R				Endemic
Asteroideae	Astereae	Baccharis spartioides (Hook. & Arn. ex DC.) J. Rémy	Baccharis	spartioides	(Hook. & Arn. ex DC.) J. Rémy	Fl. Chil.	4(1)	102		1849	Heterothalamus spartioides Hook. & Arn., Pseudobaccharis spartioides (Hook. & Arn.) Cabrera, Psila spartioides (Hook. & Arn.) Cabrera	Baccharis sarophora Phil.	R			R										Native
Asteroideae	Astereae	Baccharis sphaerocephala Hook. & Arn.	Baccharis	sphaerocephala	Hook. & Arn.	J. Bot. (Hooker)	3(17)	25		1840						R										Endemic
Asteroideae	Astereae	Baccharis sphagnophila A.A. Schneid. & G. Heiden	Baccharis	sphagnophila	A.A. Schneid. & G. Heiden	Kew Bull.	66(1)	133		2011					R											Endemic
Asteroideae	Astereae	Baccharis spicata (Lam.) Baill.	Baccharis	spicata	(Lam.) Baill.	Bull. Mens. Soc. Linn. Paris	1	268		1881	Eupatorium spicatum Lam.	Baccharis platensis Spreng	R		R						R			R		Native
Asteroideae	Astereae	Baccharis steetzii Andersson	Baccharis	steetzii	Andersson	Kongl. Svenska Vetensk. Acad. Handl.	1853[ser. 3, t. 41]	177		1855								R								Endemic
Asteroideae	Astereae	Baccharis stenophylla Ariza	Baccharis	stenophylla	Ariza	Bol. Acad. Nac. Ci.	50(1-4)	241		1973		Baccharis subpingraea Heering fo. nana Heering	R											R		Native
Asteroideae	Astereae	Baccharis sternbergiana Steud.	Baccharis	sternbergiana	Steud.	Nomencl. Bot. [Steudel], ed. 2,	1(1-2)	179		1840		Baccharis semiserrata DC.						R				R				Native
Asteroideae	Astereae	Baccharis stuebelii Hieron.	Baccharis	stuebelii	Hieron.	Bot. Jahrb. Syst.	21(3)	341		1895												R				Endemic
Asteroideae	Astereae	Baccharis stylosa Gardner	Baccharis	stylosa	Gardner	London J. Bot.	4	120		1845					R											Endemic
Asteroideae	Astereae	Baccharis subalata Wedd.	Baccharis	subalata	Wedd.	Chlor. Andina	1(4-6)	174		1856				R								R				Native
Asteroideae	Astereae	Baccharis subbimera Hieron.	Baccharis	subbimera	Hieron.	Bot. Jahrb. Syst.	21(3)	345		1895												R				Endemic
Asteroideae	Astereae	Baccharis subdentata DC.	Baccharis	subdentata	DC.	Prodr. [A. P. de Candolle]	5	408		1836					R						R					Native
Asteroideae	Astereae	Baccharis suberectifolia A.S. Oliveira & Deble	Baccharis	suberectifolia	A.S. Oliveira & Deble	Bonplandia (Corrientes)	17(1)	22		2008					R											Endemic
Asteroideae	Astereae	Baccharis subopposita DC.	Baccharis	subopposita	DC.	Prodr. [A. P. de Candolle]	5	413		1836					R											Endemic
Asteroideae	Astereae	Baccharis subsculpta Hochr.	Baccharis	subsculpta	Hochr.	Bull. New York Bot. Gard.	6(21)	292		1910												R				Endemic
Asteroideae	Astereae	Baccharis subtropicalis G. Heiden	Baccharis	subtropicalis	G. Heiden	Rodriguésia	60(4)	977		2009					R											Endemic
Asteroideae	Astereae	Baccharis taltalensis I.M. Johnst.	Baccharis	taltalensis	I.M. Johnst.	Contr. Gray Herb.	85	125		1929						R										Endemic
Asteroideae	Astereae	Baccharis tarchonanthoides DC.	Baccharis	tarchonanthoides	DC.	Prodr. [A. P. de Candolle]	5	414		1836					R											Endemic
Asteroideae	Astereae	Baccharis tarmensis Cuatrec.	Baccharis	tarmensis	Cuatrec.	Caldasia	10(46)	22		1967												R				Endemic
Asteroideae	Astereae	Baccharis teindalensis Kunth	Baccharis	teindalensis	Kunth	Nov. Gen. Sp. (folio ed.)	4(14)	42		1820[1818]							R	R								Native
Asteroideae	Astereae	Baccharis tenella Hook. & Arn.	Baccharis	tenella	Hook. & Arn.	J. Bot. (Hooker)	3(17)	42		1840		Heterothalamus tenellus (Hook. & Arn.) Kuntze	R													Endemic
Asteroideae	Astereae	Baccharis tenuicapitulata Joch. Müll.	Baccharis	tenuicapitulata	Joch. Müll.	Anales Jard. Bot. Madrid	64(2)	191		2007								R								Endemic
Asteroideae	Astereae	Baccharis thymifolia Hook. & Arn.	Baccharis	thymifolia	Hook. & Arn.	J. Bot. (Hooker)	3(17)	38		1840			R													Endemic
Asteroideae	Astereae	Baccharis tola Phil.	Baccharis	tola	Phil.	Fl. Atacam.		30		1860			R	R		R						R				Native
Asteroideae	Astereae	Baccharis tomentosa (Ruiz & Pav.) Pers.	Baccharis	tomentosa	(Ruiz & Pav.) Pers.	Syn. Pl. [Persoon]	2(2)	424		1807												R				Endemic
Asteroideae	Astereae	Baccharis torricoi Joch. Müll.	Baccharis	torricoi	Joch. Müll.	Syst. Bot. Monogr.	76	228		2006				R												Endemic
Asteroideae	Astereae	Baccharis triangularis Hauman	Baccharis	triangularis	Hauman	Anal. Mus. Nac. Hist. Nat. Buenos Aires	24	428		1913		Baccharis trimera (Less.) DC. var. viscosissima Speg	R													Endemic
Asteroideae	Astereae	Baccharis tricuneata (L. f.) Pers.	Baccharis	tricuneata	(L. f.) Pers.	Syn. Pl. [Persoon]	2(2)	424		1807	Erigeron tricuneatus L. f., Conyza tricuneata (L. f.) Willd.						R	R				R			R	Native
Asteroideae	Astereae	Baccharis tridentata Vahl	Baccharis	tridentata	Vahl	Symb. Bot. (Vahl)	3	98		1794		Baccharis affinis DC.	R	R	R						R	R		R		Native
Asteroideae	Astereae	Baccharis trilobata A.S. Oliveira & Marchiori	Baccharis	trilobata	A.S. Oliveira & Marchiori	Balduinia	7	34		2006					R											Endemic
Asteroideae	Astereae	Baccharis trimera (Less.) DC.	Baccharis	trimera	(Less.) DC.	Prodr. [A. P. de Candolle]	5	425		1836			R								R			R		Native
Asteroideae	Astereae	Baccharis trinervis Pers.	Baccharis	trinervis	Pers.	Syn. Pl. [Persoon]	2(2)	423		1807	Conyza trinervis Lam., Pseudobaccharis trinervis (Pers.) V.M. Badillo, Pseudobaccharis trinervis (Pers.) Teodoro, Heterothalamus trinervis (Pers.) Hook. & Arn., Psila trinervis (Pers.) Cabrera	Baccharis eggersii Hieron.	R	R	R		R	R		R	R	R			R	Native	Data Deficient
Asteroideae	Astereae	Baccharis trineura Soria & Zardini	Baccharis	trineura	Soria & Zardini	Candollea	56(1)	116		2001					R						R					Native
Asteroideae	Astereae	Baccharis truncata Gardner	Baccharis	truncata	Gardner	London J. Bot.	7	82		1848					R											Endemic
Asteroideae	Astereae	Baccharis tucumanensis Hook. & Arn.	Baccharis	tucumanensis	Hook. & Arn.	J. Bot. (Hooker)	3(17)	34		1840		Baccharis myrtilloides Griseb	R	R												Native
Asteroideae	Astereae	Baccharis uleana Malag.	Baccharis	uleana	Malag.	Mem. Soc. Ci. Nat. La Salle	37(107)	139		1977					R											Endemic
Asteroideae	Astereae	Baccharis ulicina Hook. & Arn.	Baccharis	ulicina	Hook. & Arn.	J. Bot. (Hooker)	3(17)	38		1840		Baccharis strobeliana Ces.	R	R												Native
Asteroideae	Astereae	Baccharis umbellata G. Heiden & Ribas	Baccharis	umbellata	G. Heiden & Ribas	Phytotaxa	49	24	f. 1–3	2012					R											Endemic
Asteroideae	Astereae	Baccharis umbelliformis DC.	Baccharis	umbelliformis	DC.	Prodr. [A. P. de Candolle]	5	410		1836						R										Endemic
Asteroideae	Astereae	Baccharis uncinella DC.	Baccharis	uncinella	DC.	Prodr. [A. P. de Candolle]	5	415		1836					R											Endemic
Asteroideae	Astereae	Baccharis uniflora (Ruiz & Pav.) Pers.	Baccharis	uniflora	(Ruiz & Pav.) Pers.	Syn. Pl. [Persoon]	2(2)	425		1807												R				Endemic
Asteroideae	Astereae	Baccharis urvilleana Brongn.	Baccharis	urvilleana	Brongn.	Voy. Monde	3		t. 61	1826[1834]					R											Endemic
Asteroideae	Astereae	Baccharis vacciniifolia Cuatrec.	Baccharis	vacciniifolia	Cuatrec.	Revista Acad. Colomb. Ci. Exact.	13(49)	29		1967							R									Endemic
Asteroideae	Astereae	Baccharis variabiliflora Deble & A.S. Oliveira	Baccharis	variabiliflora	Deble & A.S. Oliveira	Balduinia	40	23		2013					R											Endemic
Asteroideae	Astereae	Baccharis varians Gardner	Baccharis	varians	Gardner	London J. Bot.	7	84		1848										R			R		R	Native
Asteroideae	Astereae	Baccharis venulosoides Malag.	Baccharis	venulosoides	Malag.	Mem. Soc. Ci. Nat. La Salle	37(107)	139		1977												R				Endemic
Asteroideae	Astereae	Baccharis vernalis F.H. Hellw.	Baccharis	vernalis	F.H. Hellw.	Mitt. Bot. Staatssamml. München	29	338		1990						R										Endemic
Asteroideae	Astereae	Baccharis vernicosa Hook. & Arn.	Baccharis	vernicosa	Hook. & Arn.	J. Bot. (Hooker)	3(17)	28		1840					R						R			R		Native
Asteroideae	Astereae	Baccharis vincifolia Baker	Baccharis	vincifolia	Baker	Fl. Bras.	6(3)	83		1882					R									R		Native
Asteroideae	Astereae	Baccharis viscosissima (Kuntze) G. Heiden	Baccharis	viscosissima	(Kuntze) G. Heiden	Phytotaxa	459(1)	84		2020						R										Endemic
Asteroideae	Astereae	Baccharis vismioides DC.	Baccharis	vismioides	DC.	Prodr. [A. P. de Candolle]	5	412		1836					R											Endemic
Asteroideae	Astereae	Baccharis vitis-idaea Oliv.	Baccharis	vitis-idaea	Oliv.	Timehri	5	197		1886		Baccharis ptariensis Steyerm., Baccharis wurdackiana Malag.			R										R	Native
Asteroideae	Astereae	Baccharis volubilis Kunth	Baccharis	volubilis	Kunth	Nov. Gen. Sp. (folio ed.)	4(14)	45		1820[1818]	Neomolina volubilis (Kunth) F.H. Hellw.							R				R				Native
Asteroideae	Astereae	Baccharis vulneraria Baker	Baccharis	vulneraria	Baker	Fl. Bras.	6(3)	75		1882		Baccharis serrulata DC.	R		R						R			R		Native
Asteroideae	Astereae	Baccharis wagenitzii (F.H. Hellw.) Joch. Müll.	Baccharis	wagenitzii	(F.H. Hellw.) Joch. Müll.	Syst. Bot. Monogr.	76	306		2006	Heterothalamus wagenitzii F.H. Hellw., Heterothalamulopsis wagenitzii (F.H. Hellw.) Deble, A.S. Oliveira & Marchiori				R											Endemic
Asteroideae	Astereae	Baccharis weirii Baker	Baccharis	weirii	Baker	Fl. Bras.	6(3)	67		1882					R											Endemic
Asteroideae	Astereae	Baccharis woodii Joch. Müll.	Baccharis	woodii	Joch. Müll.	Syst. Bot. Monogr.	76	236		2006				R												Endemic
Asteroideae	Astereae	Baccharis woytkowskii Joch. Müll.	Baccharis	woytkowskii	Joch. Müll.	Syst. Bot.	39(3)	983		2014												R				Endemic
Asteroideae	Astereae	Baccharis wurdackeana Malag.	Baccharis	wurdackeana	Malag.	Mem. Soc. Ci. Nat. La Salle	37(107)	138		1977															R	Endemic
Asteroideae	Astereae	Baccharis zoellneri F.H. Hellw.	Baccharis	zoellneri	F.H. Hellw.	Mitt. Bot. Staatssamml. München	29	352		1990			R			R										Native
Asteroideae	Astereae	Baccharis zongoensis Joch. Müll.	Baccharis	zongoensis	Joch. Müll.	Syst. Bot. Monogr.	76	242		2006				R												Endemic
Asteroideae	Astereae	Baccharis zumbadorensis V.M. Badillo	Baccharis	zumbadorensis	V.M. Badillo	Bol. Soc. Venez. Ci. Nat.	10	307		1946															R	Endemic
Asteroideae	Eupatorieae	Badilloa atrescens (B.L. Rob.) R.M. King & H. Rob.	Badilloa	atrescens	(B.L. Rob.) R.M. King & H. Rob.	Phytologia	49(1)	7		1981	Eupatorium atrescens B.L. Rob.							R								Endemic	Endangered
Asteroideae	Eupatorieae	Badilloa drepanoides (B.L. Rob.) R.M. King & H. Rob.	Badilloa	drepanoides	(B.L. Rob.) R.M. King & H. Rob.	Phytologia	30(3)	230		1975												R				Endemic
Asteroideae	Eupatorieae	Badilloa guantivana Rodr.-Cabeza & S. Díaz	Badilloa	guantivana	Rodr.-Cabeza & S. Díaz	Revista Acad. Colomb. Ci. Exact.	36(141)	508		2012							R									Endemic
Asteroideae	Eupatorieae	Badilloa helianthifolia (Kunth) R.M. King & H. Rob.	Badilloa	helianthifolia	(Kunth) R.M. King & H. Rob.	Phytologia	30(3)	230		1975												R				Endemic
Asteroideae	Eupatorieae	Badilloa herrerae (B.L. Rob.) R.M. King & H. Rob.	Badilloa	herrerae	(B.L. Rob.) R.M. King & H. Rob.	Phytologia	30(3)	230		1975												R				Endemic
Asteroideae	Eupatorieae	Badilloa procera (B.L. Rob.) R.M. King & H. Rob.	Badilloa	procera	(B.L. Rob.) R.M. King & H. Rob.	Phytologia	30(3)	230		1975												R				Endemic
Asteroideae	Eupatorieae	Badilloa salicina (Lam.) R.M. King & H. Rob.	Badilloa	salicina	(Lam.) R.M. King & H. Rob.	Phytologia	30(3)	230		1975	Eupatorium salicinum Lam.						R	R								Native
Asteroideae	Eupatorieae	Badilloa sonsonensis R.M. King & H. Rob.	Badilloa	sonsonensis	R.M. King & H. Rob.	Phytologia	30(3)	231		1975							R									Endemic
Asteroideae	Eupatorieae	Badilloa sphagnophila (B.L. Rob.) R.M. King & H. Rob.	Badilloa	sphagnophila	(B.L. Rob.) R.M. King & H. Rob.	Phytologia	30(3)	231		1975												R				Endemic
Asteroideae	Eupatorieae	Badilloa steetzii (B.L. Rob.) R.M. King & H. Rob.	Badilloa	steetzii	(B.L. Rob.) R.M. King & H. Rob.	Phytologia	30(3)	231		1975							R								R	Native
Asteroideae	Eupatorieae	Badilloa venezuelensis (V.M. Badillo) R.M. King & H. Rob.	Badilloa	venezuelensis	(V.M. Badillo) R.M. King & H. Rob.	Phytologia	30(3)	232		1975															R	Endemic
Asteroideae	Bahieae	Bahia ambrosioides Lag.	Bahia	ambrosioides	Lag.	Gen. Sp. Pl. [Lagasca]		30		1816						R										Endemic
Asteroideae	Eupatorieae	Bahianthus viscosus (Spreng.) R.M. King & H. Rob.	Bahianthus	viscosus	(Spreng.) R.M. King & H. Rob.	Phytologia	23(3)	313		1972					R											Endemic
Asteroideae	Heliantheae	Baltimora geminata (Brandegee) Stuessy	Baltimora	geminata	(Brandegee) Stuessy	Fieldiana, Bot.	36(5)	42		1973	Melampodium geminatum Brandegee			R	R		R	R		R	R	R			R	Native
Asteroideae	Heliantheae	Baltimora recta L.	Baltimora	recta	L.	Mant. Pl. Altera	2	288		1771					R							R			R	Native
Barnadesioideae	Barnadesieae	Barnadesia aculeata (Benth.) I.C. Chung	Barnadesia	aculeata	(Benth.) I.C. Chung	Revis. Barnadesia		53		1965	Barnadesia corymbosa var. aculeata Benth.							R								Endemic	Vulnerable
Barnadesioideae	Barnadesieae	Barnadesia arborea Kunth	Barnadesia	arborea	Kunth	Nov. Gen. Sp. (folio ed.)	4(14)	13		1820[1818]	Diacantha arborea (Kunth) Less.	Diacantha arborea (Kunth) Less.						R								Endemic
Barnadesioideae	Barnadesieae	Barnadesia berberoides Sch. Bip.	Barnadesia	berberoides	Sch. Bip.	Berberid. Amer. Austral.		57		1857												R				Endemic
Barnadesioideae	Barnadesieae	Barnadesia blakeana Ferreyra	Barnadesia	blakeana	Ferreyra	Publ. Mus. Hist. Nat. Javier Prado, Ser. B, Bot.	18	14		1964												R				Endemic
Barnadesioideae	Barnadesieae	Barnadesia caryophylla (Vell.) S.F. Blake	Barnadesia	caryophylla	(Vell.) S.F. Blake	Proc. Biol. Soc. Washington	38	86		1925				R												Endemic
Barnadesioideae	Barnadesieae	Barnadesia ciliata (I.C. Chung) Harling	Barnadesia	ciliata	(I.C. Chung) Harling	Fl. Ecuador	42(190:10)	10		1991	Barnadesia lehmannii var. ciliata I.C. Chung				R			R								Native	Endangered
Barnadesioideae	Barnadesieae	Barnadesia corymbosa (Ruiz & Pav.) D. Don	Barnadesia	corymbosa	(Ruiz & Pav.) D. Don	Trans. Linn. Soc. London	16(2)	278		1830				R								R				Native
Barnadesioideae	Barnadesieae	Barnadesia dombeyana Less.	Barnadesia	dombeyana	Less.	Linnaea	5(2)	246		1830												R				Endemic
Barnadesioideae	Barnadesieae	Barnadesia glomerata Kuntze	Barnadesia	glomerata	Kuntze	Revis. Gen. Pl.	3(3)	135		1898				R								R				Native
Barnadesioideae	Barnadesieae	Barnadesia horrida Muschl.	Barnadesia	horrida	Muschl.	Bot. Jahrb. Syst.	50(2/3, Beibl. 111)	101		1913												R				Endemic
Barnadesioideae	Barnadesieae	Barnadesia hutchisoniana Ferreyra	Barnadesia	hutchisoniana	Ferreyra	Publ. Mus. Hist. Nat. Javier Prado, Ser. B, Bot.	18	30		1964												R				Endemic
Barnadesioideae	Barnadesieae	Barnadesia jelskii Hieron.	Barnadesia	jelskii	Hieron.	Bot. Jahrb. Syst.	36(5)	511		1905								R				R				Native
Barnadesioideae	Barnadesieae	Barnadesia kingii H. Rob.	Barnadesia	kingii	H. Rob.	Phytologia	32(5)	414		1975								R								Endemic
Barnadesioideae	Barnadesieae	Barnadesia lehmannii Hieron.	Barnadesia	lehmannii	Hieron.	Bot. Jahrb. Syst.	29(1)	77		1900								R				R				Native
Barnadesioideae	Barnadesieae	Barnadesia macbridei Ferreyra	Barnadesia	macbridei	Ferreyra	Publ. Mus. Hist. Nat. Javier Prado, Ser. B, Bot.	18	23		1964												R				Endemic
Barnadesioideae	Barnadesieae	Barnadesia macrocephala Kuntze	Barnadesia	macrocephala	Kuntze	Revis. Gen. Pl.	3(3)	135		1898				R												Endemic
Barnadesioideae	Barnadesieae	Barnadesia odorata Griseb.	Barnadesia	odorata	Griseb.	Abh. Königl. Ges. Wiss. Göttingen	24	210		1879		*No	R	R												Native
Barnadesioideae	Barnadesieae	Barnadesia parviflora Spruce ex Benth. & Hook. f.	Barnadesia	parviflora	Spruce ex Benth. & Hook. f.	Gen. Pl. [Bentham & Hooker f.]	2(1)	485		1873							R	R								Native
Barnadesioideae	Barnadesieae	Barnadesia polyacantha Wedd.	Barnadesia	polyacantha	Wedd.	Chlor. Andina	1(1)	13		1855				R								R				Native	Least Concern
Barnadesioideae	Barnadesieae	Barnadesia pycnophylla Muschl.	Barnadesia	pycnophylla	Muschl.	Bot. Jahrb. Syst.	50(2/3, Beibl. 111)	101		1913				R												Endemic
Barnadesioideae	Barnadesieae	Barnadesia reticulata D. Don	Barnadesia	reticulata	D. Don	Trans. Linn. Soc. London	16(2)	277		1830												R				Endemic
Barnadesioideae	Barnadesieae	Barnadesia spinosa L. f.	Barnadesia	spinosa	L. f.	Suppl. Pl.		348		1781[1782]							R	R								Native
Barnadesioideae	Barnadesieae	Barnadesia woodii D.J.N. Hind	Barnadesia	woodii	D.J.N. Hind	Kew Bull.	56(3)	705		2001				R												Endemic
Barnadesioideae	Barnadesieae	Barnadesia wurdackii Ferreyra	Barnadesia	wurdackii	Ferreyra	Publ. Mus. Hist. Nat. Javier Prado, Ser. B, Bot.	18	16		1964												R				Endemic
Asteroideae	Eupatorieae	Barrosoa apiculata (Gardner) R.M. King & H. Rob.	Barrosoa	apiculata	(Gardner) R.M. King & H. Rob.	Phytologia	24(3)	184		1972	Eupatorium apiculatum Gardner				R											Endemic
Asteroideae	Eupatorieae	Barrosoa atlantica R.M. King & H. Rob.	Barrosoa	atlantica	R.M. King & H. Rob.	Phytologia	65(1)	62	f. s.n. [p. 68]	1988					R											Endemic
Asteroideae	Eupatorieae	Barrosoa betoniciformis (DC.) R.M. King & H. Rob.	Barrosoa	betoniciformis	(DC.) R.M. King & H. Rob.	Phytologia	21(1)	27		1971	Conoclinium betoniciforme DC., Eupatorium betoniciforme (DC.) Baker		R	R	R									R		Native
Asteroideae	Eupatorieae	Barrosoa cabrerae (B.L. Rob.) R.M. King & H. Rob.	Barrosoa	cabrerae	(B.L. Rob.) R.M. King & H. Rob.	Phytologia	21(1)	27		1971	Eupatorium cabrerae B.L. Rob		R													Endemic
Asteroideae	Eupatorieae	Barrosoa candolleana (Hook. & Arn.) R.M. King & H. Rob.	Barrosoa	candolleana	(Hook. & Arn.) R.M. King & H. Rob.	Phytologia	21(1)	27		1971	Eupatorium candolleanum Hook. & Arn.	Eupatorium candolleanum Hook. & Arn. var. lancifolium Baker; Eupatorium candolleanum Hook. & Arn. var. paranense Baker; Eupatorium palustre (DC.) Baker var. verbenaceum Chodat; Eupatorium palustre (DC.) Baker var. guaraniticum Chodat	R	R	R						R					Native
Asteroideae	Eupatorieae	Barrosoa confluentis (B.L. Rob.) R.M. King & H. Rob.	Barrosoa	confluentis	(B.L. Rob.) R.M. King & H. Rob.	Phytologia	49(1)	3		1981				R												Endemic
Asteroideae	Eupatorieae	Barrosoa metensis (B.L. Rob.) R.M. King & H. Rob.	Barrosoa	metensis	(B.L. Rob.) R.M. King & H. Rob.	Phytologia	24(3)	184		1972							R								R	Native
Asteroideae	Eupatorieae	Barrosoa organensis (Gardner) R.M. King & H. Rob.	Barrosoa	organensis	(Gardner) R.M. King & H. Rob.	Phytologia	24(3)	184		1972	Eupatorium organense Gardner, Conoclinium organense (Gardner) Sch. Bip. ex Baker				R											Endemic
Asteroideae	Eupatorieae	Barrosoa ramboi (Cabrera) R.M. King & H. Rob.	Barrosoa	ramboi	(Cabrera) R.M. King & H. Rob.	Phytologia	21(1)	27		1971	Eupatorium ramboi Cabrera				R											Endemic
Asteroideae	Eupatorieae	Barrosoa trianae (B.L. Rob.) R.M. King & H. Rob.	Barrosoa	trianae	(B.L. Rob.) R.M. King & H. Rob.	Phytologia	24(3)	184		1972							R									Endemic
Asteroideae	Eupatorieae	Barrosoa viridiflora (Baker) R.M. King & H. Rob.	Barrosoa	viridiflora	(Baker) R.M. King & H. Rob.	Phytologia	24(3)	184		1972	Campuloclinium viridiflorum Bartl.				R											Endemic
Asteroideae	Eupatorieae	Bartlettina campii R.M. King & H. Rob.	Bartlettina	campii	R.M. King & H. Rob.	Phytologia	49(1)	7		1981								R								Endemic	Endangered
Asteroideae	Eupatorieae	Bartlettina cleefii R.M. King & H. Rob.	Bartlettina	cleefii	R.M. King & H. Rob.	Phytologia	47(2)	122		1980							R									Endemic
Asteroideae	Eupatorieae	Bartlettina hemisphaerica (DC.) R.M. King & H. Rob.	Bartlettina	hemisphaerica	(DC.) R.M. King & H. Rob.	Phytologia	22(3)	160		1971					R											Endemic
Asteroideae	Eupatorieae	Bartlettina liesneri R.M. King & H. Rob.	Bartlettina	liesneri	R.M. King & H. Rob.	Phytologia	47(2)	121		1980															R	Endemic
Asteroideae	Eupatorieae	Bartlettina macromeris (B.L. Rob.) R.M. King & H. Rob.	Bartlettina	macromeris	(B.L. Rob.) R.M. King & H. Rob.	Phytologia	49(1)	3		1981												R				Endemic
Asteroideae	Eupatorieae	Bartlettina paezensis (Hieron.) R.M. King & H. Rob.	Bartlettina	paezensis	(Hieron.) R.M. King & H. Rob.	Phytologia	22(3)	161		1971							R									Endemic
Asteroideae	Eupatorieae	Bartlettina perezioides (B.L. Rob.) R.M. King & H. Rob.	Bartlettina	perezioides	(B.L. Rob.) R.M. King & H. Rob.	Phytologia	47(2)	121		1980							R									Endemic
Asteroideae	Eupatorieae	Bartlettina tenorae (Aristeg.) R.M. King & H. Rob.	Bartlettina	tenorae	(Aristeg.) R.M. King & H. Rob.	Phytologia	35(6)	498		1977															R	Endemic
Asteroideae	Eupatorieae	Bejaranoa balansae (Hieron.) R.M. King & H. Rob.	Bejaranoa	balansae	(Hieron.) R.M. King & H. Rob.	Phytologia	40(1)	53		1978	Eupatorium balansae Hieron.	Eupatorium bracteatum Gardner var. reticulatum Chodat; Eupatorium balansae Hieron. var. reticulatum (Chodat) Chodat; Eupatorium balansae Hieron. var. menthoides Chodat; Eupatorium balansae Hieron. fo. foliosum Chodat	R	R							R					Native
Asteroideae	Eupatorieae	Bejaranoa semistriata (Baker) R.M. King & H. Rob.	Bejaranoa	semistriata	(Baker) R.M. King & H. Rob.	Phytologia	40(1)	53		1978	Eupatorium semistriatum Baker				R											Endemic
Asteroideae	Gnaphalieae	Belloa chilensis (Hook. & Arn.) J. Rémy	Belloa	chilensis	(Hook. & Arn.) J. Rémy	Fl. Chil.	3(3)	336		1848	Lucilia chilensis Hook. & Arn.	Gnaphalium frigidum Poepp; Lucilia frigida Reiche; Gnaphalium andicola Kuntze	R			R										Native
Asteroideae	Gnaphalieae	Belloa eriophora (J. Rémy) M.O. Dillon	Belloa	eriophora	(J. Rémy) M.O. Dillon	Arnaldoa	25(1)	55		2018						R										Endemic
Asteroideae	Gnaphalieae	Belloa nivea (Phil.) M.O. Dillon	Belloa	nivea	(Phil.) M.O. Dillon	Arnaldoa	25(1)	55		2018	Chevreulia nivea Phil.; Lucilia nivea (Phil.) Cabrera	Lucilia araucana Phil.?				R										Endemic
Asteroideae	Gnaphalieae	Belloa wurdackiana V.M. Badillo	Belloa	wurdackiana	V.M. Badillo	BioLlania (Ed. Espec.)	6	235		1997															R	Endemic
Asteroideae	Gnaphalieae	Berroa gnaphalioides (Less.) Beauverd	Berroa	gnaphalioides	(Less.) Beauverd	Bull. Soc. Bot. Genève, ser. 2,	5	211		1913	Lucilia gnaphalioides Less.; Gnaphalium gnaphalioides (Less.) Kuntze	Lucilia argentea Hook. & Arn	R		R									R		Native
Asteroideae	Coreopsideae	Bidens abadiae DC.	Bidens	abadiae	DC.	Prodr. [A. P. de Candolle]	5	601		1836												R				Endemic
Asteroideae	Coreopsideae	Bidens alba (L.) DC.	Bidens	alba	(L.) DC.	Prodr. [A. P. de Candolle]	5	605		1836				R	R		R		R	R		R			R	Native
Asteroideae	Coreopsideae	Bidens andicola Kunth	Bidens	andicola	Kunth	Nov. Gen. Sp. (folio ed.)	4(17)	186		1820[1818]			R	R		R	R	R				R				Native
Asteroideae	Coreopsideae	Bidens andrei Sherff	Bidens	andrei	Sherff	Bot. Gaz.	61(6)	495		1916							R									Endemic
Asteroideae	Coreopsideae	Bidens bipinnata L.	Bidens	bipinnata	L.	Sp. Pl.	2	832		1753				R	R		R								R	Native
Asteroideae	Coreopsideae	Bidens bipontina Sherff	Bidens	bipontina	Sherff	Bot. Gaz.	85(1)	10		1928				R												Endemic
Asteroideae	Coreopsideae	Bidens brasiliensis Sherff	Bidens	brasiliensis	Sherff	Bot. Gaz.	81(1)	49		1926					R											Endemic
Asteroideae	Coreopsideae	Bidens buchtienii Sherff	Bidens	buchtienii	Sherff	Bot. Gaz.	76(2)	150		1923				R												Endemic
Asteroideae	Coreopsideae	Bidens campanulata Bringel & T.B. Cavalc.	Bidens	campanulata	Bringel & T.B. Cavalc.	Syst. Bot.	42(2)	308		2017					R											Endemic
Asteroideae	Coreopsideae	Bidens chodatii Hassl.	Bidens	chodatii	Hassl.	Repert. Spec. Nov. Regni Veg.	12	369		1913											R					Endemic
Asteroideae	Coreopsideae	Bidens cosmantha Griseb.	Bidens	cosmantha	Griseb.	Abh. Königl. Ges. Wiss. Göttingen	19	185		1874				R												Endemic
Asteroideae	Coreopsideae	Bidens cynapiifolia Kunth	Bidens	cynapiifolia	Kunth	Nov. Gen. Sp. (folio ed.)	4(17)	185		1820[1818]	Bidens bipinnata var. cynapiifolia (Kunth) M. Gómez	Bidens bipinnata var. cynapiifolia (Kunth) M. Gómez		R			R	R	R	R		R	R		R	Native
Asteroideae	Coreopsideae	Bidens edentula G.M. Barroso	Bidens	edentula	G.M. Barroso	Sellowia	26	103	f. 2	1975					R											Endemic
Asteroideae	Coreopsideae	Bidens exigua Sherff	Bidens	exigua	Sherff	Bot. Gaz.	70(1)	89	tab. 11	1920			R	R								R				Native
Asteroideae	Coreopsideae	Bidens fistulosa Sch. Bip. ex Baker	Bidens	fistulosa	Sch. Bip. ex Baker	Fl. Bras.	6(3)	250		1884					R											Endemic
Asteroideae	Coreopsideae	Bidens flagellaris Baker	Bidens	flagellaris	Baker	Fl. Bras.	6(3)	248		1884					R											Endemic
Asteroideae	Coreopsideae	Bidens gardneri Baker	Bidens	gardneri	Baker	Fl. Bras.	6(3)	246		1884				R	R						R					Native
Asteroideae	Coreopsideae	Bidens graveolens Mart.	Bidens	graveolens	Mart.	Isis(Oken)	1824	590		1824					R											Endemic
Asteroideae	Coreopsideae	Bidens hassleriana (Chodat) A.A. Sáenz	Bidens	hassleriana	(Chodat) A.A. Sáenz	Monogr. Syst. Bot. Missouri Bot. Gard.	74	1245		1999	Bidens riedelii Baker var. hassleriana Chodat	Bidens riedelii Baker fo. intermedia Chodat & Hassl; Bidens riedelii Baker var. hirsuta Hassl	R								R					Native
Asteroideae	Coreopsideae	Bidens herzogii (Sherff) D.J.N. Hind	Bidens	herzogii	(Sherff) D.J.N. Hind	Kew Bull.	68(3)	506		2013	Cosmos herzogii Sherff			R												Endemic	Endangered
Asteroideae	Coreopsideae	Bidens holwayi Sherff & S.F. Blake	Bidens	holwayi	Sherff & S.F. Blake	Bot. Gaz.	64(1)	39		1917							R									Endemic
Asteroideae	Coreopsideae	Bidens humilis Kunth	Bidens	humilis	Kunth	Nov. Gen. Sp. (folio ed.)	4(17)	184		1820[1818]							R									Endemic
Asteroideae	Coreopsideae	Bidens leucanthema (L.) Willd.	Bidens	leucanthema	(L.) Willd.	Sp. Pl., ed. 4 [Willdenow]	3(3)	1719		1803				R												Endemic
Asteroideae	Coreopsideae	Bidens mandonii (Sherff) Cabrera	Bidens	mandonii	(Sherff) Cabrera	Fl. Prov. Jujuy	13(10)	419		1978	Bidens andicola Kunth var. mandonii Sherff		R	R												Native
Asteroideae	Coreopsideae	Bidens monticola Poepp. & Endl.	Bidens	monticola	Poepp. & Endl.	Nov. Gen. Sp. Pl. (Poeppig & Endlicher)	3(5-6)	49		1843												R				Endemic
Asteroideae	Coreopsideae	Bidens odorata Cav.	Bidens	odorata	Cav.	Icon. [Cavanilles]	1(1)	9		1791	Bidens pilosa fo. odorata (Cav.) Sherff			R			R	R							R	Native
Asteroideae	Coreopsideae	Bidens pseudocosmos Sherff	Bidens	pseudocosmos	Sherff	Bot. Gaz.	76(2)	151		1923			R	R								R				Native
Asteroideae	Coreopsideae	Bidens radiata Thuill.	Bidens	radiata	Thuill.	Fl. Env. Paris, ed. 2		432		1799					R											Endemic
Asteroideae	Coreopsideae	Bidens reptans (L.) G. Don	Bidens	reptans	(L.) G. Don	Hort. Brit. [Sweet], ed. 3,		360		1839	Coreopsis reptans L.	Bidens squarrosa Kunth; Bidens tereticaulis DC.; Bidens squarrosa Kunth var. tereticaulis (DC.) Roseman; Coreopsis trifoliata Bertol; Bidens antiguensis J.M. Coult.; Bidens tereticaulis DC. var. antiguensis (J.M. Coult.) O.E. Schulz	R	R	R		R								R	Native
Asteroideae	Coreopsideae	Bidens riedelii Baker	Bidens	riedelii	Baker	Fl. Bras.	6(3)	246		1884			R		R						R					Native
Asteroideae	Coreopsideae	Bidens riparia Kunth	Bidens	riparia	Kunth	Nov. Gen. Sp. (folio ed.)	4(17)	185		1820[1818]					R		R	R		R		R			R	Native
Asteroideae	Coreopsideae	Bidens rubifolia Kunth	Bidens	rubifolia	Kunth	Nov. Gen. Sp. (folio ed.)	4(17)	186		1820[1818]							R	R				R			R	Native
Asteroideae	Coreopsideae	Bidens segetum Mart. ex Colla	Bidens	segetum	Mart. ex Colla	Herb. Pedem.	3	307		1834				R								R				Native
Asteroideae	Coreopsideae	Bidens simplicifolia C.H. Wright	Bidens	simplicifolia	C.H. Wright	Bull. Misc. Inform. Kew	1906	5		1906								R								Endemic	Critically Endangered
Asteroideae	Coreopsideae	Bidens squarrosa Kunth	Bidens	squarrosa	Kunth	Nov. Gen. Sp. (folio ed.)	4(17)	187		1820[1818]					R		R	R				R				Native
Asteroideae	Coreopsideae	Bidens subalternans DC.	Bidens	subalternans	DC.	Prodr. [A. P. de Candolle]	5	600		1836			R	R	R		R				R	R		R		Native
Asteroideae	Coreopsideae	Bidens tenera O.E. Schulz	Bidens	tenera	O.E. Schulz	Bot. Jahrb. Syst.	50(Suppl.)	186		1914		Bidens tenera var. paucidentata	R	R	R		R				R				R	Native
Asteroideae	Coreopsideae	Bidens tripartita L.	Bidens	tripartita	L.	Sp. Pl.	2	831		1753					R											Endemic
Asteroideae	Coreopsideae	Bidens triplinervia Kunth	Bidens	triplinervia	Kunth	Nov. Gen. Sp. (folio ed.)	4(17)	182		1820[1818]			R	R		R	R	R				R			R	Native
Asteroideae	Coreopsideae	Bidens urophylla Sherff	Bidens	urophylla	Sherff	Bot. Gaz.	81(1)	32	pl. 2	1926					R											Endemic
Vernonioideae	Liabeae	Bishopanthus soliceps H. Rob.	Bishopanthus	soliceps	H. Rob.	Phytologia	54(1)	63		1983												R				Endemic
Asteroideae	Eupatorieae	Bishopiella elegans R.M. King & H. Rob.	Bishopiella	elegans	R.M. King & H. Rob.	Phytologia	48(3)	218	f. s.n.	1981					R											Endemic
Asteroideae	Eupatorieae	Bishovia boliviensis R.M. King & H. Rob.	Bishovia	boliviensis	R.M. King & H. Rob.	Phytologia	39(5)	340		1978				R												Endemic
Asteroideae	Eupatorieae	Bishovia mikaniifolia (B.L. Rob.) R.M. King & H. Rob.	Bishovia	mikaniifolia	(B.L. Rob.) R.M. King & H. Rob.	Phytologia	39(5)	341		1978	Eupatorium mikaniifolium B.L. Rob; Chacoa mikaniifolia (B.L. Rob.) R.M. King & H. Rob		R													Endemic
Asteroideae	Heliantheae	Blainvillea acmella (L.) Philipson	Blainvillea	acmella	(L.) Philipson	Blumea	6(2)	350		1950	Verbesina acmella L.	Verbesina dichotoma Murray, Blainvillea dichotoma (Murray) Stewart		R	R		R	R							R	Native
Asteroideae	Heliantheae	Blainvillea dichotoma (Murray) Cass. ex Hemsl.	Blainvillea	dichotoma	(Murray) Cass. ex Hemsl.	Proc. Calif. Acad. Sci. ser. 4,	1	149		1911									R							Endemic
Asteroideae	Astereae	Blakiella bartsiifolia (S.F. Blake) Cuatrec.	Blakiella	bartsiifolia	(S.F. Blake) Cuatrec.	Webbia	24(1)	41		1969							R								R	Native
Vernonioideae	Vernonieae	Blanchetia coronata (G.M. Barroso) Loeuille & Pirani	Blanchetia	coronata	(G.M. Barroso) Loeuille & Pirani	Phytoneuron	2014–8	1		2014	Irwinia coronata G.M. Barroso				R											Endemic
Vernonioideae	Vernonieae	Blanchetia heterotricha DC.	Blanchetia	heterotricha	DC.	Prodr. [A. P. de Candolle]	5	75		1836					R											Endemic
Asteroideae	Senecioneae	Blennosperma chilense Less.	Blennosperma	chilense	Less.	Syn. Gen. Compos.		267		1832						R										Endemic
Asteroideae	Heliantheae	Borrichia peruviana (Lam.) DC.	Borrichia	peruviana	(Lam.) DC.	Prodr. [A. P. de Candolle]	5	489		1836												R				Endemic
Mutisioideae	Mutisieae	Brachyclados caespitosus (Phil.) Speg.	Brachyclados	caespitosus	(Phil.) Speg.	Anales Soc. Ci. Argent.	53	28		1902	Lavidia caespitosa Phil.	Brachyclados obtusifolius Kuntze, Brachyclados pygmaeus Kuntze	R			R										Native
Mutisioideae	Mutisieae	Brachyclados lycioides D. Don	Brachyclados	lycioides	D. Don	Philos. Mag. Ann. Chem.	11	391		1832		Brachyclados lycioides D. Don var. microcephala Hieron., Baucis lavandulifolia Phil., Brachyclados involutus Kuntze, Brachyclados macrocephalus Kuntze	R			R										Native
Mutisioideae	Mutisieae	Brachyclados megalanthus Speg.	Brachyclados	megalanthus	Speg.	Anales Soc. Ci. Argent.	53	29		1902		Brachyclados lycioides D. Don var. macrocephala Hieron.	R													Endemic
Asteroideae	Astereae	Brachyscome multifida DC.	Brachyscome	multifida	DC.	Prodr. [A. P. de Candolle]	5	306		1836					R											Endemic
Asteroideae	Eupatorieae	Brickellia diffusa (Vahl) A. Gray	Brickellia	diffusa	(Vahl) A. Gray	Smithsonian Contr. Knowl.	3	86		1852	Eupatorium diffusum Vahl, Bulbostylis diffusa (Vahl) DC., Coleosanthus diffusus (Vahl) Kuntze	Eupatorium capillare Desv; Eupatorium leptopodum Gardner; Eupatorium trichosanthum A. Rich	R	R	R		R	R				R			R	Native
Mutisioideae	Nassauvieae	Burkartia lanigera (Hook. & Arn.) Crisci	Burkartia	lanigera	(Hook. & Arn.) Crisci	Bol. Soc. Argent. Bot.	17(3-4)	243		1976	Perezia lanigera Hook. & Arn.	Perezia sessiliflora Speg.	R													Endemic
Vernonioideae	Vernonieae	Caatinganthus harleyi H. Rob.	Caatinganthus	harleyi	H. Rob.	Smithsonian Contr. Bot.	89	16	f. 19–20	1999					R											Endemic
Vernonioideae	Vernonieae	Caatinganthus rubropappus (Soar. Nunes) H. Rob.	Caatinganthus	rubropappus	(Soar. Nunes) H. Rob.	Smithsonian Contr. Bot.	89	16		1999	Stilpnopappus rubropappus Soares Nunes				R											Endemic
Asteroideae	Astereae	Cabreraea andina (Cabrera) Bonif.	Cabreraea	andina	(Cabrera) Bonif.	Smithsonian Contr. Bot.	92	20		2009	Chiliophyllum andinum Cabrera		R													Endemic
Asteroideae	Senecioneae	Cabreriella oppositicordia (Cuatrec.) Cuatrec.	Cabreriella	oppositicordia	(Cuatrec.) Cuatrec.	Proc. Biol. Soc. Washington	98(3)	626		1985							R								R	Native
Asteroideae	Senecioneae	Cabreriella sanctae-martae (Greenm.) Cuatrec.	Cabreriella	sanctae-martae	(Greenm.) Cuatrec.	Bol. Soc. Argent. Bot.	19(1-2)	15		1980							R									Endemic
Vernonioideae	Liabeae	Cacosmia harlingii B. Nord.	Cacosmia	harlingii	B. Nord.	Bot. Not.	130	283	f. 3A-G	1977								R								Endemic	Vulnerable
Vernonioideae	Liabeae	Cacosmia hieronymi H. Rob.	Cacosmia	hieronymi	H. Rob.	Phytologia	34(1)	46		1976								R								Endemic	Vulnerable
Vernonioideae	Liabeae	Cacosmia rugosa Kunth	Cacosmia	rugosa	Kunth	Nov. Gen. Sp. (folio ed.)	4(18)	228		1820[1818]								R				R				Native
Asteroideae	Neurolaeneae	Calea abbreviata Pruski & Urbatsch	Calea	abbreviata	Pruski & Urbatsch	Brittonia	40(4)	348		1988					R											Endemic
Asteroideae	Neurolaeneae	Calea abelioides S.F. Blake	Calea	abelioides	S.F. Blake	Bull. Torrey Bot. Club	58(8)	488		1931					R		R								R	Native
Asteroideae	Neurolaeneae	Calea acaulis Baker	Calea	acaulis	Baker	Fl. Bras.	6(3)	266		1884					R						R					Native
Asteroideae	Neurolaeneae	Calea aldamoides G.H.L. da Silva, Bringel & A.M. Teles	Calea	aldamoides	G.H.L. da Silva, Bringel & A.M. Teles	Phytotaxa	265(3)	280		2016					R											Endemic
Asteroideae	Neurolaeneae	Calea angosturana Hieron.	Calea	angosturana	Hieron.	Bot. Jahrb. Syst.	19(1)	56		1894							R									Endemic	Least Concern
Asteroideae	Neurolaeneae	Calea angusta S.F. Blake	Calea	angusta	S.F. Blake	Contr. U.S. Natl. Herb.	26(5)	258		1930					R											Endemic
Asteroideae	Neurolaeneae	Calea anomala Hassl.	Calea	anomala	Hassl.	Repert. Spec. Nov. Regni Veg.	7(19-21)	356		1909				R	R											Native
Asteroideae	Neurolaeneae	Calea asclepiifolia Hassl.	Calea	asclepiifolia	Hassl.	Repert. Spec. Nov. Regni Veg.	14	173		1915			R		R						R					Native
Asteroideae	Neurolaeneae	Calea bahiensis (Mattf.) H. Rob.	Calea	bahiensis	(Mattf.) H. Rob.	Phytologia	32(5)	428		1975					R											Endemic
Asteroideae	Neurolaeneae	Calea bakeriana Chodat	Calea	bakeriana	Chodat	Bull. Herb. Boissier, sér. 2,	2	395		1902											R					Endemic
Asteroideae	Neurolaeneae	Calea berteriana DC.	Calea	berteriana	DC.	Prodr. [A. P. de Candolle]	5	672		1836							R	R				R			R	Native
Asteroideae	Neurolaeneae	Calea brittoniana Pruski	Calea	brittoniana	Pruski	Brittonia	36(2)	98	f. 1	1984					R											Endemic
Asteroideae	Neurolaeneae	Calea bucaramangensis Pruski & Urbatsch	Calea	bucaramangensis	Pruski & Urbatsch	Syst. Bot.	8(1)	93		1983							R									Endemic
Asteroideae	Neurolaeneae	Calea caleoides (DC.) H. Rob.	Calea	caleoides	(DC.) H. Rob.	Phytologia	32(5)	428		1975	Schomburgkia caleoides DC., Geissopappus caleoides (DC.) Benth., Trinchinettia caleoides (DC.) Endl. ex Walp.				R					R			R		R	Native
Asteroideae	Neurolaeneae	Calea camani Maguire & K.D. Phelps	Calea	camani	Maguire & K.D. Phelps	Bol. Soc. Venez. Ci. Nat.	14	16		1952															R	Endemic
Asteroideae	Neurolaeneae	Calea candolleana (Gardner) Baker	Calea	candolleana	(Gardner) Baker	Fl. Bras.	6(3)	256		1884					R											Endemic
Asteroideae	Neurolaeneae	Calea chapadensis Malme	Calea	chapadensis	Malme	Ark. Bot.	24A(8)	51		1932					R											Endemic
Asteroideae	Neurolaeneae	Calea chocoensis Cuatrec.	Calea	chocoensis	Cuatrec.	Revista Acad. Colomb. Ci. Exact.	9(35)	233		1954							R									Endemic
Asteroideae	Neurolaeneae	Calea chodatii Hassl.	Calea	chodatii	Hassl.	Repert. Spec. Nov. Regni Veg.	14	174		1915											R					Endemic
Asteroideae	Neurolaeneae	Calea clausseniana Baker	Calea	clausseniana	Baker	Fl. Bras.	6(3)	265		1884					R											Endemic
Asteroideae	Neurolaeneae	Calea clematidea Baker	Calea	clematidea	Baker	Fl. Bras.	6(3)	262		1884		Calea rojasiana Chodat	R		R						R			R		Native
Asteroideae	Neurolaeneae	Calea colombiana Gand.	Calea	colombiana	Gand.	Bull. Soc. Bot. France	65	39		1918							R									Endemic
Asteroideae	Neurolaeneae	Calea coriacea DC.	Calea	coriacea	DC.	Prodr. [A. P. de Candolle]	5	675		1836				R												Endemic
Asteroideae	Neurolaeneae	Calea coronopifolia Sch. Bip. ex Krasch.	Calea	coronopifolia	Sch. Bip. ex Krasch.	Bot. Mater. Gerb. Glavn. Bot. Sada R.S.F.S.R.	4	53		1923					R											Endemic
Asteroideae	Neurolaeneae	Calea crenata Sch. Bip. ex Baker	Calea	crenata	Sch. Bip. ex Baker	Fl. Bras.	6(3)	356		1884					R						R					Native
Asteroideae	Neurolaeneae	Calea cuneifolia DC.	Calea	cuneifolia	DC.	Prodr. [A. P. de Candolle]	5	674		1836					R						R					Native
Asteroideae	Neurolaeneae	Calea cymosa Less.	Calea	cymosa	Less.	Linnaea	5(1)	158		1830			R		R						R			R		Native
Asteroideae	Neurolaeneae	Calea dalyi Pruski & Urbatsch	Calea	dalyi	Pruski & Urbatsch	Brittonia	39(2)	201		1987		Calea woodii Pozo & D.J.N.Hind		R	R											Native	Endangered
Asteroideae	Neurolaeneae	Calea diamantinensis G.A.R. Silva & J.N. Nakaj.	Calea	diamantinensis	G.A.R. Silva & J.N. Nakaj.	Phytotaxa	432(2)	200		2020					R											Endemic
Asteroideae	Neurolaeneae	Calea diffusa Pruski	Calea	diffusa	Pruski	Phytoneuron	2013–72	11	f. 3–6	2013					R											Endemic
Asteroideae	Neurolaeneae	Calea divaricata Benth.	Calea	divaricata	Benth.	J. Bot. (Hooker)	2(9)	44		1840										R					R	Native
Asteroideae	Neurolaeneae	Calea divergens Sch. Bip. ex Baker	Calea	divergens	Sch. Bip. ex Baker	Fl. Bras.	6(3)	262		1884					R											Endemic
Asteroideae	Neurolaeneae	Calea elongata (Gardner) Baker	Calea	elongata	(Gardner) Baker	Fl. Bras.	6(3)	255		1884					R											Endemic
Asteroideae	Neurolaeneae	Calea esposi Maguire & K.D. Phelps	Calea	esposi	Maguire & K.D. Phelps	Bol. Soc. Venez. Ci. Nat.	14	16		1952															R	Endemic
Asteroideae	Neurolaeneae	Calea ferruginea Sch. Bip. ex Baker	Calea	ferruginea	Sch. Bip. ex Baker	Fl. Bras.	6(3)	261		1884					R											Endemic
Asteroideae	Neurolaeneae	Calea formosa Chodat	Calea	formosa	Chodat	Bull. Herb. Boissier, sér. 2,	2	396		1902											R					Endemic
Asteroideae	Neurolaeneae	Calea fruticosa (Gardner) Urbatsch, Zlotsky & Pruski	Calea	fruticosa	(Gardner) Urbatsch, Zlotsky & Pruski	Syst. Bot.	11(4)	506		1986					R											Endemic
Asteroideae	Neurolaeneae	Calea gardneriana Baker	Calea	gardneriana	Baker	Fl. Bras.	6(3)	255		1884					R											Endemic
Asteroideae	Neurolaeneae	Calea gentianoides DC.	Calea	gentianoides	DC.	Prodr. [A. P. de Candolle]	5	672		1836					R											Endemic
Asteroideae	Neurolaeneae	Calea graminifolia Sch. Bip. ex Krasch.	Calea	graminifolia	Sch. Bip. ex Krasch.	Bot. Mater. Gerb. Glavn. Bot. Sada R.S.F.S.R.	4	53		1923					R											Endemic
Asteroideae	Neurolaeneae	Calea grazielae J.U. Santos	Calea	grazielae	J.U. Santos	Bradea	3(16)	119	f.	1980					R											Endemic
Asteroideae	Neurolaeneae	Calea harleyi H. Rob.	Calea	harleyi	H. Rob.	Phytologia	44(4)	272		1979					R											Endemic
Asteroideae	Neurolaeneae	Calea harlingii H. Rob.	Calea	harlingii	H. Rob.	Phytologia	82(1)	59		1997								R								Endemic	Vulnerable
Asteroideae	Neurolaeneae	Calea hassleriana Chodat	Calea	hassleriana	Chodat	Bull. Herb. Boissier, sér. 2,	3	727		1903		Calea platylepis Sch. Bip. ex Baker var. mollis Chodat	R								R					Native
Asteroideae	Neurolaeneae	Calea hatschbachii Pruski & D.J.N. Hind	Calea	hatschbachii	Pruski & D.J.N. Hind	Kew Bull.	53(3)	695	f. 1	1998					R											Endemic
Asteroideae	Neurolaeneae	Calea heteropappa Pruski & Urbatsch	Calea	heteropappa	Pruski & Urbatsch	Brittonia	40(4)	346	f. 2	1988					R											Endemic
Asteroideae	Neurolaeneae	Calea huanchacana Pruski	Calea	huanchacana	Pruski	Phytoneuron	2013–72	6		2013				R												Endemic	Endangered
Asteroideae	Neurolaeneae	Calea huigrensis S.F. Blake	Calea	huigrensis	S.F. Blake	Bot. Gaz.	74(4)	426		1922								R								Endemic	Endangered
Asteroideae	Neurolaeneae	Calea hymenolepis Baker	Calea	hymenolepis	Baker	Fl. Bras.	6(3)	258		1884					R											Endemic
Asteroideae	Neurolaeneae	Calea hypericifolia (Gardner) Baker	Calea	hypericifolia	(Gardner) Baker	Fl. Bras.	6(3)	258		1884					R											Endemic
Asteroideae	Neurolaeneae	Calea ilienii Malme	Calea	ilienii	Malme	Kongl. Svenska Vetensk. Acad. Handl., n.f.,	12(2)	94	f. 17	1933					R											Endemic
Asteroideae	Neurolaeneae	Calea intermedia Pruski & Urbatsch	Calea	intermedia	Pruski & Urbatsch	Brittonia	40(4)	351		1988					R											Endemic
Asteroideae	Neurolaeneae	Calea irwinii G.M. Barroso	Calea	irwinii	G.M. Barroso	Sellowia	26	108		1975					R											Endemic
Asteroideae	Neurolaeneae	Calea jamaicensis (L.) L.	Calea	jamaicensis	(L.) L.	Sp. Pl., ed. 2,	2	1179		1763							R									Endemic
Asteroideae	Neurolaeneae	Calea jelskii Hieron.	Calea	jelskii	Hieron.	Bot. Jahrb. Syst.	36(5)	496		1905												R				Endemic
Asteroideae	Neurolaeneae	Calea kingii H. Rob.	Calea	kingii	H. Rob.	Phytologia	32(5)	426		1975								R								Endemic	Vulnerable
Asteroideae	Neurolaeneae	Calea kirkbridei H. Rob.	Calea	kirkbridei	H. Rob.	Phytologia	44(4)	271	f.	1979					R											Endemic
Asteroideae	Neurolaeneae	Calea kristiniae Pruski	Calea	kristiniae	Pruski	Brittonia	36(2)	98	f. 2	1984					R											Endemic
Asteroideae	Neurolaeneae	Calea kunhardtii Maguire	Calea	kunhardtii	Maguire	Mem. New York Bot. Gard.	8(2)	146		1953															R	Endemic
Asteroideae	Neurolaeneae	Calea lantanoides Gardner	Calea	lantanoides	Gardner	London J. Bot.	7	416		1848				R	R											Native
Asteroideae	Neurolaeneae	Calea lemmatioides Sch. Bip. ex Baker	Calea	lemmatioides	Sch. Bip. ex Baker	Fl. Bras.	6(3)	252		1884					R											Endemic
Asteroideae	Neurolaeneae	Calea linearifolia Maguire & Wurdack	Calea	linearifolia	Maguire & Wurdack	Mem. New York Bot. Gard.	9(3)	371		1957															R	Endemic
Asteroideae	Neurolaeneae	Calea lucida Maguire & Wurdack	Calea	lucida	Maguire & Wurdack	Mem. New York Bot. Gard.	9(3)	371		1957															R	Endemic
Asteroideae	Neurolaeneae	Calea lucidivenia Gleason & S.F. Blake	Calea	lucidivenia	Gleason & S.F. Blake	Brittonia	3(2)	195		1938		Calea cardonae			R		R			R					R	Native
Asteroideae	Neurolaeneae	Calea lutea Pruski & Urbatsch	Calea	lutea	Pruski & Urbatsch	Brittonia	40(4)	353		1988				R	R											Native
Asteroideae	Neurolaeneae	Calea marginata S.F. Blake	Calea	marginata	S.F. Blake	J. Wash. Acad. Sci.	27(9)	387		1937					R											Endemic
Asteroideae	Neurolaeneae	Calea martiana Baker	Calea	martiana	Baker	Fl. Bras.	6(3)	256		1884					R											Endemic
Asteroideae	Neurolaeneae	Calea mediterranea (Vell.) Pruski	Calea	mediterranea	(Vell.) Pruski	Sida	21(4)	2024		2005	Buphthalmum mediterraneum Vell.	Calea platylepis Sch.Bip. ex Baker	R		R						R					Native
Asteroideae	Neurolaeneae	Calea melissifolia Baker	Calea	melissifolia	Baker	Fl. Bras.	6(3)	257		1884					R											Endemic
Asteroideae	Neurolaeneae	Calea microphylla (Gardner) Baker	Calea	microphylla	(Gardner) Baker	Fl. Bras.	6(3)	259		1884					R											Endemic
Asteroideae	Neurolaeneae	Calea monocephala Dusén	Calea	monocephala	Dusén	Ark. Bot.	9(15)	32		1910					R											Endemic
Asteroideae	Neurolaeneae	Calea montana Klatt	Calea	montana	Klatt	Leopoldina	20	96		1884							R					R				Native
Asteroideae	Neurolaeneae	Calea morii H. Rob.	Calea	morii	H. Rob.	Phytologia	44(7)	437	f.	1979					R											Endemic
Asteroideae	Neurolaeneae	Calea multiplinervia Less.	Calea	multiplinervia	Less.	Linnaea	5(1)	159		1830					R											Endemic
Asteroideae	Neurolaeneae	Calea myrtifolia (DC.) Baker	Calea	myrtifolia	(DC.) Baker	Fl. Bras.	6(3)	260		1884					R											Endemic
Asteroideae	Neurolaeneae	Calea nana Maguire	Calea	nana	Maguire	Mem. New York Bot. Gard.	8(2)	147		1953															R	Endemic
Asteroideae	Neurolaeneae	Calea neblinensis (Maguire & Wurdack) Pruski	Calea	neblinensis	(Maguire & Wurdack) Pruski	Fl. Venez. Guayana	3	228		1997					R										R	Native
Asteroideae	Neurolaeneae	Calea nematophylla Pruski	Calea	nematophylla	Pruski	Kew Bull.	53(3)	684		1998				R												Endemic	Endangered
Asteroideae	Neurolaeneae	Calea nervosa G.M. Barroso	Calea	nervosa	G.M. Barroso	Sellowia	26	109	f. 6	1975					R											Endemic
Asteroideae	Neurolaeneae	Calea nitida Less.	Calea	nitida	Less.	Linnaea	5(1)	158		1830					R											Endemic
Asteroideae	Neurolaeneae	Calea oliveri B.L. Rob. & Greenm.	Calea	oliveri	B.L. Rob. & Greenm.	Proc. Boston Soc. Nat. Hist.	29(5)	106		1901[1899]					R					R					R	Native
Asteroideae	Neurolaeneae	Calea orbiculata Maguire & Aristeg.	Calea	orbiculata	Maguire & Aristeg.	Mem. New York Bot. Gard.	9(3)	372		1957															R	Endemic
Asteroideae	Neurolaeneae	Calea oxylepis Baker	Calea	oxylepis	Baker	Fl. Bras.	6(3)	254		1884					R											Endemic
Asteroideae	Neurolaeneae	Calea papposa Malme	Calea	papposa	Malme	Ark. Bot.	24A(8)	50		1932				R	R											Native
Asteroideae	Neurolaeneae	Calea paraguayensis (Kuntze) Deble	Calea	paraguayensis	(Kuntze) Deble	Balduinia	29	5		2011					R											Endemic
Asteroideae	Neurolaeneae	Calea parvifolia (DC.) Baker	Calea	parvifolia	(DC.) Baker	Fl. Bras.	6(3)	259		1884					R											Endemic
Asteroideae	Neurolaeneae	Calea perijaensis Cuatrec.	Calea	perijaensis	Cuatrec.	Revista Acad. Colomb. Ci. Exact.	9(35)	234		1954							R								R	Native
Asteroideae	Neurolaeneae	Calea perimbricata Cuatrec.	Calea	perimbricata	Cuatrec.	Revista Acad. Colomb. Ci. Exact.	9(35)	235		1954							R									Endemic
Asteroideae	Neurolaeneae	Calea peruviana (Kunth) Benth. ex S.F. Blake	Calea	peruviana	(Kunth) Benth. ex S.F. Blake	J. Bot.	53	155		1915							R									Endemic	Least Concern
Asteroideae	Neurolaeneae	Calea phelpsiae Lasser & Maguire	Calea	phelpsiae	Lasser & Maguire	Brittonia	7(2)	87		1950															R	Endemic
Asteroideae	Neurolaeneae	Calea phyllolepis Baker	Calea	phyllolepis	Baker	Fl. Bras.	6(3)	260		1884					R											Endemic
Asteroideae	Neurolaeneae	Calea pilosa Baker	Calea	pilosa	Baker	Fl. Bras.	6(3)	257		1884					R											Endemic
Asteroideae	Neurolaeneae	Calea pinheiroi H. Rob.	Calea	pinheiroi	H. Rob.	Phytologia	44(4)	273		1979					R											Endemic
Asteroideae	Neurolaeneae	Calea pinnatifida (R. Br.) Less.	Calea	pinnatifida	(R. Br.) Less.	Linnaea	5(1)	158		1830	Caleacte pinnatifida R. Br.	Mocinna brasiliensis Spreng.; Actinea commutata Spreng.; Calea glabra DC.; Calea pinnatifida (R. Br.) Less. var. glabra (DC.) Baker	R		R						R					Native
Asteroideae	Neurolaeneae	Calea pohliana Sch. Bip. ex Baker	Calea	pohliana	Sch. Bip. ex Baker	Fl. Bras.	6(3)	266		1884					R											Endemic
Asteroideae	Neurolaeneae	Calea politii Maguire	Calea	politii	Maguire	Mem. New York Bot. Gard.	8(2)	148		1953															R	Endemic
Asteroideae	Neurolaeneae	Calea polycephala (Baker) H. Rob.	Calea	polycephala	(Baker) H. Rob.	Phytologia	32(5)	428		1975					R											Endemic
Asteroideae	Neurolaeneae	Calea prunifolia Kunth	Calea	prunifolia	Kunth	Nov. Gen. Sp. (folio ed.)	4(18)	231		1820[1818]								R							R	Native
Asteroideae	Neurolaeneae	Calea punctata Maguire & Wurdack	Calea	punctata	Maguire & Wurdack	Mem. New York Bot. Gard.	9(3)	373		1957															R	Endemic
Asteroideae	Neurolaeneae	Calea purpurea G.M. Barroso	Calea	purpurea	G.M. Barroso	Sellowia	26	110	t. 7	1975					R											Endemic
Asteroideae	Neurolaeneae	Calea quadrifolia Pruski & Urbatsch	Calea	quadrifolia	Pruski & Urbatsch	Brittonia	40(4)	341	f. 1	1988					R											Endemic
Asteroideae	Neurolaeneae	Calea ramosissima Baker	Calea	ramosissima	Baker	Fl. Bras.	6(3)	257		1884					R											Endemic
Asteroideae	Neurolaeneae	Calea reticulata Gardner	Calea	reticulata	Gardner	London J. Bot.	7	416		1848					R											Endemic
Asteroideae	Neurolaeneae	Calea rhombifolia S.F. Blake	Calea	rhombifolia	S.F. Blake	Proc. Biol. Soc. Washington	36	53		1923				R												Endemic	Least Concern
Asteroideae	Neurolaeneae	Calea robinsoniana Pruski	Calea	robinsoniana	Pruski	Kew Bull.	53(3)	688		1998					R											Endemic
Asteroideae	Neurolaeneae	Calea rotundifolia (Less.) Baker	Calea	rotundifolia	(Less.) Baker	Fl. Bras.	6(3)	253		1884					R											Endemic
Asteroideae	Neurolaeneae	Calea rupicola Chodat	Calea	rupicola	Chodat	Bull. Herb. Boissier, sér. 2,	3	726		1903					R						R					Native
Asteroideae	Neurolaeneae	Calea saxatilis Cuatrec.	Calea	saxatilis	Cuatrec.	Revista Acad. Colomb. Ci. Exact.	9(35)	236		1954							R								R	Native
Asteroideae	Neurolaeneae	Calea semirii Pruski & D.J.N. Hind	Calea	semirii	Pruski & D.J.N. Hind	Kew Bull.	53(3)	698	f. 2	1998					R											Endemic
Asteroideae	Neurolaeneae	Calea senecioides Baker	Calea	senecioides	Baker	Fl. Bras.	6(3)	258		1884					R											Endemic
Asteroideae	Neurolaeneae	Calea septuplinervia Hieron.	Calea	septuplinervia	Hieron.	Bot. Jahrb. Syst.	28(5)	615		1901							R								R	Native
Asteroideae	Neurolaeneae	Calea serrata Less.	Calea	serrata	Less.	Linnaea	5(1)	158		1830					R											Endemic
Asteroideae	Neurolaeneae	Calea sessiliflora Less.	Calea	sessiliflora	Less.	Linnaea	5(1)	158		1830							R					R				Native	Least Concern
Asteroideae	Neurolaeneae	Calea sickii (G.M. Barroso) Urbatsch, Zlotsky & Pruski	Calea	sickii	(G.M. Barroso) Urbatsch, Zlotsky & Pruski	Syst. Bot.	11(4)	504		1986					R											Endemic
Asteroideae	Neurolaeneae	Calea sipapoana Maguire	Calea	sipapoana	Maguire	Mem. New York Bot. Gard.	8(2)	148		1953															R	Endemic	Critically Endangered
Asteroideae	Neurolaeneae	Calea solidaginea Kunth	Calea	solidaginea	Kunth	Nov. Gen. Sp. (folio ed.)	4(18)	231		1820[1818]				R	R		R		R	R			R		R	Native
Asteroideae	Neurolaeneae	Calea subcordata S.F. Blake	Calea	subcordata	S.F. Blake	J. Wash. Acad. Sci.	25(7)	318		1935							R								R	Native
Asteroideae	Neurolaeneae	Calea sublantanoides V.M. Badillo	Calea	sublantanoides	V.M. Badillo	Ernstia	1	1		1981															R	Endemic
Asteroideae	Neurolaeneae	Calea szyszylowiczii Hieron.	Calea	szyszylowiczii	Hieron.	Bot. Jahrb. Syst.	36(5)	497		1905												R				Endemic
Asteroideae	Neurolaeneae	Calea ternifolia Kunth	Calea	ternifolia	Kunth	Nov. Gen. Sp. (folio ed.)	4(18)	231		1820[1818]							R									Endemic
Asteroideae	Neurolaeneae	Calea teucriifolia (Gardner) Baker	Calea	teucriifolia	(Gardner) Baker	Fl. Bras.	6(3)	259		1884					R											Endemic
Asteroideae	Neurolaeneae	Calea tocantina Pruski	Calea	tocantina	Pruski	Phytoneuron	2013–72	8	f. 3–5	2013					R											Endemic
Asteroideae	Neurolaeneae	Calea tolimana Hieron.	Calea	tolimana	Hieron.	Bot. Jahrb. Syst.	19(1)	57		1894							R								R	Native
Asteroideae	Neurolaeneae	Calea triantha (Vell.) Pruski	Calea	triantha	(Vell.) Pruski	Sida	21(4)	2027	f. 2	2005					R						R					Native
Asteroideae	Neurolaeneae	Calea tricephala Maguire	Calea	tricephala	Maguire	Mem. New York Bot. Gard.	8(2)	149		1953															R	Endemic
Asteroideae	Neurolaeneae	Calea tridactylita Sch. Bip. ex Krasch.	Calea	tridactylita	Sch. Bip. ex Krasch.	Bot. Mater. Gerb. Glavn. Bot. Sada R.S.F.S.R.	4	54		1923					R											Endemic
Asteroideae	Neurolaeneae	Calea trujilloi V.M. Badillo	Calea	trujilloi	V.M. Badillo	Bol. Soc. Venez. Ci. Nat.	130/131	350		1974															R	Endemic
Asteroideae	Neurolaeneae	Calea ulei Hieron.	Calea	ulei	Hieron.	Verh. Bot. Vereins Prov. Brandenburg	48(2)	204		1907												R				Endemic
Asteroideae	Neurolaeneae	Calea umbellulata Hochr.	Calea	umbellulata	Hochr.	Bull. New York Bot. Gard.	6(21)	298		1910								R				R				Native
Asteroideae	Neurolaeneae	Calea uniflora Less.	Calea	uniflora	Less.	Linnaea	5(1)	159		1830			R		R						R			R		Native
Asteroideae	Neurolaeneae	Calea verticillata (Klatt) Pruski	Calea	verticillata	(Klatt) Pruski	Kew Bull.	53(3)	689		1998	Tridax verticillata Klatt	Calea clausseniana Baker var. balansana Baker; Calea multijuga Krasch; Calea catalaonensis Krasch	R		R						R					Native
Asteroideae	Neurolaeneae	Calea villosa Sch. Bip. ex Baker	Calea	villosa	Sch. Bip. ex Baker	Fl. Bras.	6(3)	262		1884					R											Endemic
Asteroideae	Neurolaeneae	Calea wedelioides (Baker) S.F. Blake	Calea	wedelioides	(Baker) S.F. Blake	Contr. Gray Herb.	54	189		1918					R											Endemic
Asteroideae	Neurolaeneae	Calea yariguiensis Rodr.-Cabeza & S. Díaz	Calea	yariguiensis	Rodr.-Cabeza & S. Díaz	Revista Acad. Colomb. Ci. Exact.	36(141)	505		2012							R									Endemic
Asteroideae	Neurolaeneae	Calea yuruparina Cuatrec.	Calea	yuruparina	Cuatrec.	Revista Acad. Colomb. Ci. Exact.	9(35)	236		1954							R									Endemic
Mutisioideae	Nassauvieae	Calopappus acerosus Meyen	Calopappus	acerosus	Meyen	Reise Erde	1	315		1834						R										Endemic
Asteroideae	Heliantheae	Calyptocarpus biaristatus (DC.) H. Rob.	Calyptocarpus	biaristatus	(DC.) H. Rob.	Phytologia	41(1)	34		1978	Blainvillea biaristata DC.	Oligogyne megapotamica DC.; Calyptocarpus megapotamica (DC.) Sch. Bip; Oligogyne synedrelloides Hook. & Arn	R								R			R		Native
Asteroideae	Heliantheae	Calyptocarpus vialis Less.	Calyptocarpus	vialis	Less.	Syn. Gen. Compos.		221		1832															R	Endemic
Asteroideae	Eupatorieae	Campovassouria barbosae H. Rob.	Campovassouria	barbosae	H. Rob.	Phytologia	88(2)	138	f. 2	2006					R											Endemic
Asteroideae	Eupatorieae	Campovassouria cruciata (Vell.) R.M. King & H. Rob.	Campovassouria	cruciata	(Vell.) R.M. King & H. Rob.	Phytologia	49(1)	3		1981	Chrysocoma cruciata Vell.	Eupatorium bupleurifolium DC; Campovassouria bupleurifolia (DC.) R.M. King & H. Rob.; Eupatorium linifolium DC; Eupatorium bupleurifolium DC. var. linifolium (DC.) Baker; Eupatorium asclepiadeum DC; Eupatorium bupleurifolium DC. var. asclepiadeum (DC.) Baker; Eupatorium ensifolium Griseb; Eupatorium bupleurifolium DC. var. ensifolium (Griseb.) Hieron; Eupatorium graminifolium Chodat; Eupatorium c…	R	R	R						R			R		Native
Asteroideae	Eupatorieae	Campuloclinium alternifolium Gardner	Campuloclinium	alternifolium	Gardner	London J. Bot.	6	438		1847					R											Endemic
Asteroideae	Eupatorieae	Campuloclinium burchellii (Baker) R.M. King & H. Rob.	Campuloclinium	burchellii	(Baker) R.M. King & H. Rob.	Phytologia	24(3)	171		1972	Eupatorium burchellii Baker		R	R	R						R					Native
Asteroideae	Eupatorieae	Campuloclinium campuloclinioides (Baker) R.M. King & H. Rob.	Campuloclinium	campuloclinioides	(Baker) R.M. King & H. Rob.	Phytologia	29(2)	123		1974	Ageratum campuloclinioides Baker				R											Endemic
Asteroideae	Eupatorieae	Campuloclinium chlorolepis (Baker) R.M. King & H. Rob.	Campuloclinium	chlorolepis	(Baker) R.M. King & H. Rob.	Phytologia	24(3)	171		1972	Eupatorium chlorolepis Baker				R											Endemic
Asteroideae	Eupatorieae	Campuloclinium hickenii (Cabrera & Vittet) R.M. King & H. Rob.	Campuloclinium	hickenii	(Cabrera & Vittet) R.M. King & H. Rob.	Phytologia	24(3)	171		1972	Eupatorium hickenii Cabrera & Vittet	Eupatorium betonicaeforme (DC.) Baker fo. alternifolium Hicken; Campuloclinium macrocephalum (Less.) DC	R													Endemic
Asteroideae	Eupatorieae	Campuloclinium hirsutum Gardner	Campuloclinium	hirsutum	Gardner	London J. Bot.	6	438		1847	Eupatorium gardnerianum Hieron., Eupatorium hirsutum (Gardner) Baker				R											Endemic
Asteroideae	Eupatorieae	Campuloclinium irwinii R.M. King & H. Rob.	Campuloclinium	irwinii	R.M. King & H. Rob.	Phytologia	24(5)	405		1972					R											Endemic
Asteroideae	Eupatorieae	Campuloclinium macrocephalum (Less.) DC.	Campuloclinium	macrocephalum	(Less.) DC.	Prodr. [A. P. de Candolle]	5	137		1836	Eupatorium macrocephalum Less.;	Eupatorium donianum Hook. & Arn; Campuloclinium macrocephalum (Less.) DC. var. strigosum DC; Chromolaena pratensis Gardner; Eupatorium macrocephalum (Less.) DC. var. angustifolium Baker; Eupatorium stigmatosum Chodat; Eupatorium macrocephalum (Less.) DC. var. stigmatosum (Chodat) Hassl; Eupatorium denudatum Chodat; Eupatorium stigmatosum Chodat var. subcalvatum Chodat; Eupatorium stigmatosum Chod…	R	R	R		R				R			R	R	Native
Asteroideae	Eupatorieae	Campuloclinium megacephalum (Mart. ex Baker) R.M. King & H. Rob.	Campuloclinium	megacephalum	(Mart. ex Baker) R.M. King & H. Rob.	Phytologia	24(3)	172		1972	Eupatorium megacephalum Mart. ex Baker				R						R					Native
Asteroideae	Eupatorieae	Campuloclinium parvulum (Glaz.) R.M. King & H. Rob.	Campuloclinium	parvulum	(Glaz.) R.M. King & H. Rob.	Phytologia	37(5)	457		1977	!Eupatorium parvulum Glaz. ex B.L. Rob.				R											Endemic
Asteroideae	Eupatorieae	Campuloclinium purpurascens (Sch. Bip. ex Baker) R.M. King & H. Rob.	Campuloclinium	purpurascens	(Sch. Bip. ex Baker) R.M. King & H. Rob.	Phytologia	24(3)	172		1972	Eupatorium purpurascens Sch. Bip. ex Baker	Eupatorium glaziouii Baker; Eupatorium glaziouii Baker var. molle Hassl	R		R						R					Native
Asteroideae	Eupatorieae	Campuloclinium riedelii (Baker) R.M. King & H. Rob.	Campuloclinium	riedelii	(Baker) R.M. King & H. Rob.	Phytologia	24(3)	172		1972	Eupatorium riedelii Baker				R						R					Native
Asteroideae	Eupatorieae	Campuloclinium scabrum (Klatt) J. Calvo & Roque	Campuloclinium	scabrum	(Klatt) J. Calvo & Roque	Syst. Bot.	43(2)	623	f. 11b	2018	Trichogonia scabra Klatt				R											Endemic
Asteroideae	Millerieae	Carramboa badilloi (Cuatrec.) Cuatrec.	Carramboa	badilloi	(Cuatrec.) Cuatrec.	Phytologia	35(1)	54		1976															R	Endemic	Near Threatened
Asteroideae	Millerieae	Carramboa littlei (Aristeg.) Cuatrec.	Carramboa	littlei	(Aristeg.) Cuatrec.	Phytologia	35(1)	54		1976															R	Endemic
Asteroideae	Millerieae	Carramboa pittieri (Cuatrec.) Cuatrec.	Carramboa	pittieri	(Cuatrec.) Cuatrec.	Phytologia	35(1)	54		1976															R	Endemic
Asteroideae	Millerieae	Carramboa rodriguezii (Cuatrec.) Cuatrec.	Carramboa	rodriguezii	(Cuatrec.) Cuatrec.	Phytologia	35(1)	54		1976															R	Endemic	Least Concern
Asteroideae	Millerieae	Carramboa tachirensis (Aristeg.) Cuatrec.	Carramboa	tachirensis	(Aristeg.) Cuatrec.	Phytologia	52(3)	158		1982															R	Endemic
Asteroideae	Millerieae	Carramboa trujillensis (Cuatrec.) Cuatrec.	Carramboa	trujillensis	(Cuatrec.) Cuatrec.	Phytologia	35(1)	54		1976															R	Endemic	Endangered
Asteroideae	Millerieae	Carramboa wurdackii (Ruíz-Terán & López-Fig.) Cuatrec.	Carramboa	wurdackii	(Ruíz-Terán & López-Fig.) Cuatrec.	Phytologia	52(3)	158		1982															R	Endemic
Asteroideae	Eupatorieae	Castanedia santamartensis R.M. King & H. Rob.	Castanedia	santamartensis	R.M. King & H. Rob.	Phytologia	39(1)	58		1978							R									Endemic	Least Concern
Asteroideae	Eupatorieae	Catolesia huperzioides Roque, H. Rob. & A.A. Conc.	Catolesia	huperzioides	Roque, H. Rob. & A.A. Conc.	Novon	19(4)	507	f. 1, 2	2009					R											Endemic
Asteroideae	Eupatorieae	Catolesia mentiens D.J.N. Hind	Catolesia	mentiens	D.J.N. Hind	Kew Bull.	55(4)	943	f. 1	2000					R											Endemic
Asteroideae	Eupatorieae	Catolesia monocephala Roque & S.C. Ferreira	Catolesia	monocephala	Roque & S.C. Ferreira	Phytotaxa	347(4)	273		2018					R											Endemic
Asteroideae	Eupatorieae	Cavalcantia percymosa R.M. King & H. Rob.	Cavalcantia	percymosa	R.M. King & H. Rob.	Phytologia	47(2)	114		1980					R											Endemic
Asteroideae	Senecioneae	Caxamarca sanchezii M.O. Dillon & Sagást.	Caxamarca	sanchezii	M.O. Dillon & Sagást.	Novon	9(2)	156		1999												R				Endemic
Carduoideae	Cardueae	Centaurodendron dracaenoides Johow	Centaurodendron	dracaenoides	Johow	Estud. H. Juan Fernandez		63		1896						R										Endemic	Critically Endangered
Carduoideae	Cardueae	Centaurodendron palmiforme Skottsb.	Centaurodendron	palmiforme	Skottsb.	Bull. Jard. Bot. État Bruxelles	27	587		1857						R										Endemic	Critically Endangered
Asteroideae	Eupatorieae	Centenaria rupacquiana P. Gonzáles, A. Cano & H. Rob.	Centenaria	rupacquiana	P. Gonzáles, A. Cano & H. Rob.	PhytoKeys	113	69		2018												R				Endemic
Asteroideae	Athroismeae	Centipeda elatinoides (Less.) Benth. & Hook. f. ex O. Hoffm.	Centipeda	elatinoides	(Less.) Benth. & Hook. f. ex O. Hoffm.	Nat. Pflanzenfam. [Engler & Prantl]	4(4-5)	280		1890	Myriogyne elatinoides Less		R			R										Native
Vernonioideae	Vernonieae	Centratherum camporum (Hassl.) Malme	Centratherum	camporum	(Hassl.) Malme	Ark. Bot.	24A(6)	15		1931	Centratherum punctatum subsp. camporum Hassl.,	Centratherum punctatum Cass. var. albicans Hassl., Centratherum camporum (Hassl.) Malme var. albicans (Hassl.) Malme, Centratherum confertum K. Kirkman	R								R					Native
Vernonioideae	Vernonieae	Centratherum cardenasii H. Rob.	Centratherum	cardenasii	H. Rob.	Phytologia	46(7)	444		1980				R												Endemic	Vulnerable
Vernonioideae	Vernonieae	Centratherum punctatum Cass.	Centratherum	punctatum	Cass.	Dict. Sci. Nat. (ed. 2)	7	384		1817	Baccharoides punctatum (Cass.) Kuntze	Ampherephis aristata Kunth, Ampherephis mutica Kunth, Centratherum muticum (Kunth) Less., Centratherum brachylepis Sch.Bip. ex Baker, Centratherum punctatum Cass. var. foliosum Chodat, Centratherum punctatum Cass. fo. foliosum (Chodat) Hassl., Centratherum punctatum Cass. var. longipes Hassl., Centratherum camporum (Hassl.) Malme var. longipes (Hassl.) Malme, Centratherum punctatum Cass. var. vis…	R	R	R		R	R	R	R	R	R			R	Native
Vernonioideae	Vernonieae	Centratherum repens (Spreng.) Loeuille & Pirani	Centratherum	repens	(Spreng.) Loeuille & Pirani	Phytoneuron	2014–8	3		2014	Calydermos repens Spreng.				R											Endemic
Mutisioideae	Nassauvieae	Cephalopappus sonchifolius Nees & Mart.	Cephalopappus	sonchifolius	Nees & Mart.	Nova Acta Phys.-Med. Acad. Caes. Leop.-Carol. Nat. Cur.	12	6		1824					R											Endemic
Asteroideae	Eupatorieae	Chacoa pseudoprasiifolia (Hassl.) R.M. King & H. Rob.	Chacoa	pseudoprasiifolia	(Hassl.) R.M. King & H. Rob.	Phytologia	32(3)	276		1975	Eupatorium pseudoprasiifolium Hassl.	Eupatorium fiebrigii Hassl.; Eupatorium fiebrigii Hassl. var. heterophylla Hassl; Eupatorium fiebrigii Hassl. var. acuminata Hassl	R		R						R					Native
Asteroideae	Senecioneae	Chaetacalia stylotrichus (Cabrera) Pruski	Chaetacalia	stylotrichus	(Cabrera) Pruski	Phytoneuron	2021–65	16		2021	Senecio stylotrichus Cabrera, Lasiocephalus stylotrichus (Cabrera) Cuatrec.			R												Endemic	Vulnerable
Mutisioideae	Mutisieae	Chaetanthera albiflora (Phil.) A.M.R. Davies	Chaetanthera	albiflora	(Phil.) A.M.R. Davies	Chaetanthera & Oriastrum		129		2010						R										Endemic
Mutisioideae	Mutisieae	Chaetanthera chilensis (Willd.) DC.	Chaetanthera	chilensis	(Willd.) DC.	Ann. Mus. Natl. Hist. Nat.	19	70		1812	Perdicium chilense Willd.	Chaetanthera chilensis (Willd.) DC. var. tenuifolia (D. Don) Cabrera, Chaetanthera tenuifolia D. Don, Chaetanthera argentea D. Don	R			R										Native
Mutisioideae	Mutisieae	Chaetanthera ciliata Ruiz & Pav.	Chaetanthera	ciliata	Ruiz & Pav.	Syst. Veg. Fl. Peruv. Chil.	1	190		1798						R										Endemic
Mutisioideae	Mutisieae	Chaetanthera depauperata (Hook. & Arn.) A.M.R. Davies	Chaetanthera	depauperata	(Hook. & Arn.) A.M.R. Davies	Chaetanthera & Oriastrum		142		2010						R										Endemic
Mutisioideae	Mutisieae	Chaetanthera elegans Phil.	Chaetanthera	elegans	Phil.	Linnaea	28(6)	712		1858		Chaetanthera elata Phil., Chaetanthera elegans Phil. var. pratensis (Phil.) Cabrera, Chaetanthera pratensis Phil., Chaetanthera andina Phil. var. pratensis (Phil.) Reiche, Chaetanthera andina Phil., Chaetanthera elegans Phil. var. andina (Phil.) Cabrera, Chaetanthera araucana Phil., Chaetanthera comata Phil., Chaetanthera foliosa Phil., Chaetanthera montana Phil., Chaetanthera elegans Phil. var. …	R			R										Native
Mutisioideae	Mutisieae	Chaetanthera euphrasioides (DC.) F. Meigen	Chaetanthera	euphrasioides	(DC.) F. Meigen	Bot. Jahrb. Syst.	17(3-4)	284		1893	Elachia euphrasioides DC., Tylloma euphrasioides (DC.) Wedd.,	Chaetanthera debilis Meyen & Walp.	R			R										Native
Mutisioideae	Mutisieae	Chaetanthera flabellata D. Don ex Taylor & Phillips	Chaetanthera	flabellata	D. Don ex Taylor & Phillips	Philos. Mag. Ann. Chem.	11	391		1832						R										Endemic
Mutisioideae	Mutisieae	Chaetanthera flabellifolia Cabrera	Chaetanthera	flabellifolia	Cabrera	Revista Mus. La Plata, Secc. Bot.	1(3)	153		1937						R										Endemic
Mutisioideae	Mutisieae	Chaetanthera frayjorgensis A.M.R. Davies	Chaetanthera	frayjorgensis	A.M.R. Davies	Chaetanthera & Oriastrum		193		2010						R										Endemic
Mutisioideae	Mutisieae	Chaetanthera glabrata (DC.) F. Meigen	Chaetanthera	glabrata	(DC.) F. Meigen	Bot. Jahrb. Syst.	18(4)	456		1894						R										Endemic
Mutisioideae	Mutisieae	Chaetanthera glandulosa J. Rémy	Chaetanthera	glandulosa	J. Rémy	Fl. Chil.	3(3)	311		1848						R										Endemic
Mutisioideae	Mutisieae	Chaetanthera incana Poepp. ex Less.	Chaetanthera	incana	Poepp. ex Less.	Linnaea	5(2)	284		1830						R										Endemic
Mutisioideae	Mutisieae	Chaetanthera kalinae A.M.R. Davies	Chaetanthera	kalinae	A.M.R. Davies	Novon	16(1)	51		2006						R										Endemic
Mutisioideae	Mutisieae	Chaetanthera limbata (D. Don) Less.	Chaetanthera	limbata	(D. Don) Less.	Syn. Gen. Compos.		116		1832	Tylloma limbatum D. Don	Tylloma eurylepis Phil., Tylloma glabratum DC. var. eurylepis (Phil.) Reiche, Tylloma ciliatum Phil., Chaetanthera schroederi G. F. Grandjot & K. Grandjot	R			R										Native
Mutisioideae	Mutisieae	Chaetanthera linearis Poepp. ex Less.	Chaetanthera	linearis	Poepp. ex Less.	Syn. Gen. Compos.		112		1832						R										Endemic
Mutisioideae	Mutisieae	Chaetanthera microphylla (Cass.) Hook. & Arn.	Chaetanthera	microphylla	(Cass.) Hook. & Arn.	Companion Bot. Mag.	1(4)	104		1835	Cherina microphylla Cass.	Onoseris linifolia Bertero, Chaetanthera linifolia Bertero ex Less., Euthrixia salsoloides D. Don	R			R										Native
Mutisioideae	Mutisieae	Chaetanthera moenchioides Less.	Chaetanthera	moenchioides	Less.	Syn. Gen. Compos.		113		1832		Chaetanthera australis Cabrera	R			R										Native
Mutisioideae	Mutisieae	Chaetanthera multicaulis DC.	Chaetanthera	multicaulis	DC.	Prodr. [A. P. de Candolle]	7(1)	31		1838						R										Endemic
Mutisioideae	Mutisieae	Chaetanthera perpusilla (Wedd.) Anderb. & S.E. Freire	Chaetanthera	perpusilla	(Wedd.) Anderb. & S.E. Freire	Taxon	39(3)	431		1990				R		R										Native
Mutisioideae	Mutisieae	Chaetanthera peruviana A. Gray	Chaetanthera	peruviana	A. Gray	Proc. Amer. Acad. Arts	5	144		1861		Chaetanthera chiquianensis Ferreyra				R						R				Native
Mutisioideae	Mutisieae	Chaetanthera philippii B.L. Rob.	Chaetanthera	philippii	B.L. Rob.	Proc. Amer. Acad. Arts	49(8)	514		1913		Tylloma lanatum Phil., Chondrochilus lanatus Phil., Chondrochilus involucratus Phil., involucratum (Phil.) Reiche, Chaetanthera philippii B.L. Rob., Chondrochilus grandiflorus Phil., Chondrochilus lanatus Phil.	R			R										Native
Mutisioideae	Mutisieae	Chaetanthera pubescens A.M.R. Davies	Chaetanthera	pubescens	A.M.R. Davies	Chaetanthera & Oriastrum		207		2010						R										Endemic
Mutisioideae	Mutisieae	Chaetanthera ramosissima D. Don ex Taylor & Phillips	Chaetanthera	ramosissima	D. Don ex Taylor & Phillips	Philos. Mag. Ann. Chem.	11	391		1832						R										Endemic
Mutisioideae	Mutisieae	Chaetanthera renifolia (J. Rémy) Cabrera	Chaetanthera	renifolia	(J. Rémy) Cabrera	Revista Mus. La Plata, Secc. Bot.	1(3)	149		1937						R										Endemic
Mutisioideae	Mutisieae	Chaetanthera schroederi G. Grandjot & K. Grandjot	Chaetanthera	schroederi	G. Grandjot & K. Grandjot	Verh. Deutsch. Wiss. Vereines Santiago	3	65		1936						R										Endemic
Mutisioideae	Mutisieae	Chaetanthera spathulifolia Cabrera	Chaetanthera	spathulifolia	Cabrera	Revista Mus. La Plata, Secc. Bot.	1(3)	141		1937		Carmelita spathulata Phil., Chaetanthera spathulata (Phil.) Hauman	R			R										Native
Mutisioideae	Mutisieae	Chaetanthera splendens (J. Rémy) B.L. Rob.	Chaetanthera	splendens	(J. Rémy) B.L. Rob.	Proc. Amer. Acad. Arts	49(8)	514		1913	Elachia splendens J. Rémy, Tylloma splendens (J. Rémy) Wedd.		R			R										Native
Mutisioideae	Mutisieae	Chaetanthera taltalensis (Cabrera) A.M.R. Davies	Chaetanthera	taltalensis	(Cabrera) A.M.R. Davies	Chaetanthera & Oriastrum		183		2010						R										Endemic
Mutisioideae	Mutisieae	Chaetanthera villosa D. Don ex Taylor & Phillips	Chaetanthera	villosa	D. Don ex Taylor & Phillips	Philos. Mag. Ann. Chem.	11	391		1832		Carmelita formosa Gay ex DC.	R			R										Native
Mutisioideae	Mutisieae	Chaptalia anisobasis S.F. Blake	Chaptalia	anisobasis	S.F. Blake	J. Wash. Acad. Sci.	25(7)	324		1935							R									Endemic
Mutisioideae	Mutisieae	Chaptalia araneosa Casar.	Chaptalia	araneosa	Casar.	Atti Riunione Sci. Ital.	3	514		1841					R											Endemic
Mutisioideae	Mutisieae	Chaptalia arechavaletae Hieron.	Chaptalia	arechavaletae	Hieron.	Anales Mus. Nac. Montevideo ser. 2,	1	14	lám. 6	1904			R		R									R		Native
Mutisioideae	Mutisieae	Chaptalia callacallensis Cuatrec.	Chaptalia	callacallensis	Cuatrec.	Fontqueria	9	5		1985												R				Endemic
Mutisioideae	Mutisieae	Chaptalia chapadensis D.J.N. Hind	Chaptalia	chapadensis	D.J.N. Hind	Kew Bull.	54(4)	933		1999					R											Endemic
Mutisioideae	Mutisieae	Chaptalia cipoensis Roque	Chaptalia	cipoensis	Roque	Kew Bull.	60(1)	133	f. 1	2005					R											Endemic
Mutisioideae	Mutisieae	Chaptalia cordata Hieron.	Chaptalia	cordata	Hieron.	Bot. Jahrb. Syst.	21(4)	370		1896							R	R				R				Native
Mutisioideae	Mutisieae	Chaptalia cordifolia (Baker) Cabrera	Chaptalia	cordifolia	(Baker) Cabrera	Fl. Ilustr. Catarin.		67		1973	Trichocline cordifolia Baker				R											Endemic
Mutisioideae	Mutisieae	Chaptalia denticulata (Baker) Zardini	Chaptalia	denticulata	(Baker) Zardini	Darwiniana	19(2–4)	728		1975	Trichocline denticulata Baker				R											Endemic
Mutisioideae	Mutisieae	Chaptalia exscapa (Pers.) Baker	Chaptalia	exscapa	(Pers.) Baker	Fl. Bras.	6(3)	379		1884	Tussilago exscapa Pers., Leria exscapa (Pers.) DC., Thyrsanthema exscapa (Pers.) Kuntze	Loxodon brevipes Cass., Gerbera brevipes (Cass.) Sch. Bip.	R		R	R	R							R		Native
Mutisioideae	Mutisieae	Chaptalia hermogenis M.D. Moraes	Chaptalia	hermogenis	M.D. Moraes	Novon	8(2)	173	f. 1	1998					R											Endemic
Mutisioideae	Mutisieae	Chaptalia ignota Burkart	Chaptalia	ignota	Burkart	Physis (Buenos Aires)	11	102	f. 2	1932		*No	R		R									R		Native
Mutisioideae	Mutisieae	Chaptalia incana Cuatrec.	Chaptalia	incana	Cuatrec.	Proc. Biol. Soc. Washington	74	24		1961							R									Endemic
Mutisioideae	Mutisieae	Chaptalia integerrima (Vell.) Burkart	Chaptalia	integerrima	(Vell.) Burkart	Darwiniana	6(4)	576		1944	Tussilago integerrima Vell., Leria integrifolia Cass.	Leria nutans (L.) DC. var. integrifolia (Cass.) Less., Chaptalia integrifolia (Cass.) Baker, Thyrsanthema integrifolia (Cass.) Kuntze, Leria lutescens Sch.Bip., Chaptalia microdonta Greene	R	R	R					R	R	R		R	R	Native
Mutisioideae	Mutisieae	Chaptalia isernina Cuatrec.	Chaptalia	isernina	Cuatrec.	Anales Univ. Madrid, Ci.	4(2)	212	f. 2-3	1935												R				Endemic
Mutisioideae	Mutisieae	Chaptalia malcabalensis Cuatrec.	Chaptalia	malcabalensis	Cuatrec.	Ciencia (Mexico)	24(1-2)	123		1965												R				Endemic
Mutisioideae	Mutisieae	Chaptalia mandonii Burkart	Chaptalia	mandonii	Burkart	Darwiniana	6(4)	551		1944				R												Endemic
Mutisioideae	Mutisieae	Chaptalia martii (Baker) Zardini	Chaptalia	martii	(Baker) Zardini	Darwiniana	19(2–4)	728		1975	Trichocline martii Baker				R											Endemic
Mutisioideae	Mutisieae	Chaptalia meridensis S.F. Blake	Chaptalia	meridensis	S.F. Blake	Contr. U.S. Natl. Herb.	20(13)	540		1924															R	Endemic
Mutisioideae	Mutisieae	Chaptalia modesta Burkart	Chaptalia	modesta	Burkart	Physis (Buenos Aires)	11	100		1932		*No	R													Endemic
Mutisioideae	Mutisieae	Chaptalia nutans (L.) Pol.	Chaptalia	nutans	(L.) Pol.	Linnaea	41(7)	582		1878	Tussilago nutans L., Chaptalia nutans (L.) Hemsl., Leria nutans (L.) DC., Gerbera nutans (L.) Sch. Bip., Thyrsanthema nutans (L.) Kuntze	Tussilago lyrata Pers., Leria lyrata (Pers.) Cass., Tussilago vaccina Vell., Thyrsanthema ebracteata Kuntze, Chaptalia ebracteata (Kuntze) K. Schum., Chaptalia texana Greene, Chaptalia nutans (L.) Pol. var. texana (Greene) Burkart, Chaptalia diversifolia Greene, Leafl. Chaptalia subcordata Greene, Chaptalia erosa Greene, Chaptalia majuscula Greene,	R	R	R		R	R		R	R	R	R	R	R	Native
Mutisioideae	Mutisieae	Chaptalia oblonga D. Don	Chaptalia	oblonga	D. Don	Trans. Linn. Soc. London	16(2)	240		1830	Trichocline oblonga (D. Don) Hieron. ex Burkart, Thyrsanthema oblonga (D. Don) Kuntze							R				R				Native
Mutisioideae	Mutisieae	Chaptalia paramensis Cuatrec.	Chaptalia	paramensis	Cuatrec.	Proc. Biol. Soc. Washington	74	25		1961							R								R	Native
Mutisioideae	Mutisieae	Chaptalia piloselloides (Vahl) Baker	Chaptalia	piloselloides	(Vahl) Baker	Fl. Bras.	6(3)	378		1884	Perdicium piloselloides Vahl	Tussilago sinuata Pers. subsp. piloselloides (Vahl) Pers., Lieberkuhna bracteata Cass., Gerbera bracteata (Cass.) Sch.Bip., Thyrsanthema piloselloides (Vahl) Kuntze, Chaptalia runcinata Kunth, Loxodon longipes Cass., Oxydon bicolor Less, Leria mandonii Sch.Bip., Chaptalia piloselloides (Vahl) Baker var. graminifolia Dusén ex Malme, Chaptalia runcinata Kunth var. graminifolia (Dusén ex Malme) Burk…	R	R	R		R				R	R		R	R	Native
Mutisioideae	Mutisieae	Chaptalia rotundifolia D. Don	Chaptalia	rotundifolia	D. Don	Trans. Linn. Soc. London	16(2)	242		1830				R								R				Native
Mutisioideae	Mutisieae	Chaptalia runcinata Kunth	Chaptalia	runcinata	Kunth	Nov. Gen. Sp. (folio ed.)	4(14)	5		1820[1818]	Oxyodon bicolor Less., Thyrsanthema runcinata (Kunth) Kuntze	Oxyodon bicolor Less., Thyrsanthema runcinata (Kunth) Kuntze						R							R	Native
Mutisioideae	Mutisieae	Chaptalia similis R.E. Fr.	Chaptalia	similis	R.E. Fr.	Nova Acta Regiae Soc. Sci. Upsal., ser. 2,	1(1)	95	t. 7, f. 3–6	1905		*No	R	R								R				Native
Mutisioideae	Mutisieae	Chaptalia sinuata (Less.) Baker	Chaptalia	sinuata	(Less.) Baker	Fl. Bras.	6(3)	378		1884	Leria nutans var. sinuata Less., Leria sinuata (Less.) DC., Thyrsanthema sinuata (Less.) Kuntze		R								R			R		Native
Mutisioideae	Mutisieae	Chaptalia stuebelii Hieron.	Chaptalia	stuebelii	Hieron.	Bot. Jahrb. Syst.	21(4)	371		1896							R	R								Native
Asteroideae	Senecioneae	Chersodoma antennaria (Wedd.) Cabrera	Chersodoma	antennaria	(Wedd.) Cabrera	Revista Mus. La Plata, Secc. Bot.	6(27)	352		1946				R								R				Native
Asteroideae	Senecioneae	Chersodoma arequipensis (Cuatrec.) Cuatrec.	Chersodoma	arequipensis	(Cuatrec.) Cuatrec.	Brittonia	12(3)	185		1960						R						R				Native
Asteroideae	Senecioneae	Chersodoma argentina Cabrera	Chersodoma	argentina	Cabrera	Revista Mus. La Plata, Secc. Bot.	6(27)	345		1946		*No	R													Endemic
Asteroideae	Senecioneae	Chersodoma candida Phil.	Chersodoma	candida	Phil.	Anales Mus. Nac., Santiago de Chile, secc. 2, bot.	8	33		1891		Senecio oxyodon Phil., Senecio chersodomus Reiche	R	R		R										Native
Asteroideae	Senecioneae	Chersodoma deltoidea M.O. Dillon & Sagást.	Chersodoma	deltoidea	M.O. Dillon & Sagást.	Brittonia	48(4)	598		1996												R				Endemic
Asteroideae	Senecioneae	Chersodoma diclina (Wedd.) Cabrera	Chersodoma	diclina	(Wedd.) Cabrera	Revista Mus. La Plata, Secc. Bot.	6(27)	353		1946												R				Endemic
Asteroideae	Senecioneae	Chersodoma filifolia M. Zárate	Chersodoma	filifolia	M. Zárate	Darwiniana, ser. 2,	5(1)	66		2017				R												Endemic
Asteroideae	Senecioneae	Chersodoma glabriuscula (Cabrera) M.O. Dillon & Sagást.	Chersodoma	glabriuscula	(Cabrera) M.O. Dillon & Sagást.	Brittonia	48(4)	600		1996	Senecio diclinus var. glabriusculus Cabrera, Chersodoma diclina var. glabriuscula (Cabrera) Cabrera		R													Endemic
Asteroideae	Senecioneae	Chersodoma helianthemoides (Wedd.) J. Calvo & M. Zárate	Chersodoma	helianthemoides	(Wedd.) J. Calvo & M. Zárate	Novon	28(3)	186		2020				R												Endemic
Asteroideae	Senecioneae	Chersodoma jodopappa (Sch. Bip. ex Wedd.) Cabrera	Chersodoma	jodopappa	(Sch. Bip. ex Wedd.) Cabrera	Revista Mus. La Plata, Secc. Bot.	6(27)	350		1946	Senecio jodopappus Sch. Bip., Senecio jodopappus Sch. Bip. ex Wedd.		R	R		R						R				Native
Asteroideae	Senecioneae	Chersodoma juanisernii (Cuatrec.) Cuatrec.	Chersodoma	juanisernii	(Cuatrec.) Cuatrec.	Brittonia	12(3)	183		1960												R				Endemic
Asteroideae	Senecioneae	Chersodoma ovopedata (Cuatrec.) Cuatrec.	Chersodoma	ovopedata	(Cuatrec.) Cuatrec.	Brittonia	12(3)	185		1960												R				Endemic
Asteroideae	Gnaphalieae	Chevreulia acuminata Less.	Chevreulia	acuminata	Less.	Linnaea	5(3)	360		1830		C. elegans Rusby, C. diemi Cabrera, C. filiformis Hook. and Arn., C. longipes Wedd.	R	R	R	R	R	R			R	R		R	R	Native
Asteroideae	Gnaphalieae	Chevreulia lycopodioides (d'Urv.) DC.	Chevreulia	lycopodioides	(d'Urv.) DC.	Prodr. [A. P. de Candolle]	7(1)	45		1838	Gnaphalium lycopodioides d’Urv.		R			R										Native	Least Concern
Asteroideae	Gnaphalieae	Chevreulia pusilla DC.	Chevreulia	pusilla	DC.	Prodr. [A. P. de Candolle]	7(1)	45		1838		Chevreulia lanceolata J. Rémy	R			R										Native
Asteroideae	Gnaphalieae	Chevreulia revoluta A.A. Schneid. & R. Trevis.	Chevreulia	revoluta	A.A. Schneid. & R. Trevis.	Syst. Bot.	36(3)	782		2011					R											Endemic
Asteroideae	Gnaphalieae	Chevreulia sarmentosa (Pers.) S.F. Blake	Chevreulia	sarmentosa	(Pers.) S.F. Blake	Proc. Biol. Soc. Washington	38	85		1925	Tussilago sarmentosa Pers.	Chevreulia stolonifera Cass.; Chaptalia sarmentosa Pers.; Xeranthemum caespitosum (cespitosum) Thouars; Leria caespitosa (Thouars) Spreng.; Gnaphalium calycinum Poir; Chevreulia thouarsii J. Rémy	R	R	R	R					R			R		Native
Asteroideae	Astereae	Chiliophyllum densifolium Phil.	Chiliophyllum	densifolium	Phil.	Anales Univ. Chile	21	397		1862		Phyllochilium densifolium (Phil.) Cabrera	R													Endemic
Asteroideae	Astereae	Chiliotrichiopsis keidelii Cabrera	Chiliotrichiopsis	keidelii	Cabrera	Notas Mus. La Plata, Bot.	2(16)	172		1937			R	R												Native
Asteroideae	Astereae	Chiliotrichiopsis ledifolia (Griseb.) Cabrera	Chiliotrichiopsis	ledifolia	(Griseb.) Cabrera	Notas Mus. La Plata, Bot.	9(46)	244		1944	Gutierrezia ledifolia Griseb.		R													Endemic
Asteroideae	Astereae	Chiliotrichiopsis peruviana G.L. Nesom, H. Rob. & A. Granda	Chiliotrichiopsis	peruviana	G.L. Nesom, H. Rob. & A. Granda	Brittonia	53(3)	430		2001												R				Endemic
Asteroideae	Astereae	Chiliotrichum diffusum (G. Forst.) Kuntze	Chiliotrichum	diffusum	(G. Forst.) Kuntze	Revis. Gen. Pl.	3(3)	141		1898	Amellus diffusus G. Forst.	Chiliotrichum amelloideum Cass. nom. illeg., Aster magellanicus Spreng. nom. illeg., Tropidolepis diffusa (G. Forst.) Tausch, Chiliotrichum amelloideum var. diffusum (G. Forst.) Nees, Chiliotrichum diffusum f. typica Speg. nom. illeg., Chiliotrichum amelloideum var. lanceolatum Nees, Chiliotrichum feliciae Hombr. and Jacquin., Chiliotrichum ovatifolium Hombr. and Jacquin., Chiliotrichum ovatifoli…	R			R										Native
Asteroideae	Astereae	Chiliotrichum fuegianum (O. Hoffm.) Bonif.	Chiliotrichum	fuegianum	(O. Hoffm.) Bonif.	Smithsonian Contr. Bot.	92	47		2009	Chiliophyllum fuegianum O. Hoffm		R			R										Native
Wunderlichioideae	Wunderlichieae	Chimantaea acopanensis Steyerm.	Chimantaea	acopanensis	Steyerm.	Ann. Missouri Bot. Gard.	71(1)	335		1984															R	Endemic
Wunderlichioideae	Wunderlichieae	Chimantaea cinerea (Gleason & S.F. Blake) Maguire, Steyerm. & Wurdack	Chimantaea	cinerea	(Gleason & S.F. Blake) Maguire, Steyerm. & Wurdack	Mem. New York Bot. Gard.	9(3)	429		1957															R	Endemic
Wunderlichioideae	Wunderlichieae	Chimantaea eriocephala Maguire, Steyerm. & Wurdack	Chimantaea	eriocephala	Maguire, Steyerm. & Wurdack	Mem. New York Bot. Gard.	9(3)	431		1957															R	Endemic
Wunderlichioideae	Wunderlichieae	Chimantaea espeletoidea Maguire, Steyerm. & Wurdack	Chimantaea	espeletoidea	Maguire, Steyerm. & Wurdack	Mem. New York Bot. Gard.	9(3)	433		1957															R	Endemic
Wunderlichioideae	Wunderlichieae	Chimantaea huberi Steyerm.	Chimantaea	huberi	Steyerm.	Ann. Missouri Bot. Gard.	71(1)	335		1984															R	Endemic
Wunderlichioideae	Wunderlichieae	Chimantaea humilis Maguire, Steyerm. & Wurdack	Chimantaea	humilis	Maguire, Steyerm. & Wurdack	Mem. New York Bot. Gard.	9(3)	432		1957															R	Endemic
Wunderlichioideae	Wunderlichieae	Chimantaea lanocaulis Maguire, Steyerm. & Wurdack	Chimantaea	lanocaulis	Maguire, Steyerm. & Wurdack	Mem. New York Bot. Gard.	9(3)	430		1957															R	Endemic
Wunderlichioideae	Wunderlichieae	Chimantaea mirabilis Maguire, Steyerm. & Wurdack	Chimantaea	mirabilis	Maguire, Steyerm. & Wurdack	Mem. New York Bot. Gard.	9(3)	432		1957															R	Endemic
Wunderlichioideae	Wunderlichieae	Chimantaea rupicola Maguire, Steyerm. & Wurdack	Chimantaea	rupicola	Maguire, Steyerm. & Wurdack	Mem. New York Bot. Gard.	9(3)	431		1957															R	Endemic
Asteroideae	Gnaphalieae	Chionolaena adpressifolia Loeuille	Chionolaena	adpressifolia	Loeuille	Kew Bull.	66(2)	263		2011					R											Endemic
Asteroideae	Gnaphalieae	Chionolaena arbuscula DC.	Chionolaena	arbuscula	DC.	Prodr. [A. P. de Candolle]	5	397		1836					R											Endemic
Asteroideae	Gnaphalieae	Chionolaena campestris Deble	Chionolaena	campestris	Deble	Kew Bull.	66(2)	264		2011					R											Endemic
Asteroideae	Gnaphalieae	Chionolaena canastrensis J.N. Nakaj.	Chionolaena	canastrensis	J.N. Nakaj.	Kew Bull.	66(2)	266		2011					R											Endemic
Asteroideae	Gnaphalieae	Chionolaena capitata (Baker) S.E. Freire	Chionolaena	capitata	(Baker) S.E. Freire	Ann. Missouri Bot. Gard.	80(2)	410		1993					R											Endemic
Asteroideae	Gnaphalieae	Chionolaena chrysocoma (Wedd.) S.E. Freire	Chionolaena	chrysocoma	(Wedd.) S.E. Freire	Ann. Missouri Bot. Gard.	80(2)	415		1993	Oligandra chrysocoma Wedd., Pseudoligandra chrysocoma (Wedd.) M.O.Dillon & Sagást.						R									Endemic	Least Concern
Asteroideae	Gnaphalieae	Chionolaena columbiana S.F. Blake	Chionolaena	columbiana	S.F. Blake	J. Wash. Acad. Sci.	25(7)	312		1935		Parachionolaena columbiana (S.F. Blake) M.O. Dillon and Saga´st					R								R	Native
Asteroideae	Gnaphalieae	Chionolaena isabellae Baker	Chionolaena	isabellae	Baker	Fl. Bras.	6(3)	130		1882					R											Endemic
Asteroideae	Gnaphalieae	Chionolaena jeffreyi H. Rob.	Chionolaena	jeffreyi	H. Rob.	Phytologia	55(3)	121		1984					R											Endemic
Asteroideae	Gnaphalieae	Chionolaena juniperina Loeuille	Chionolaena	juniperina	Loeuille	Kew Bull.	66(2)	268		2011					R											Endemic
Asteroideae	Gnaphalieae	Chionolaena latifolia (Benth.) Baker	Chionolaena	latifolia	(Benth.) Baker	Fl. Bras.	6(3)	132		1882	Leucopholis latifolia Benth.	Chionolaena breweri Steyerm. and Maguirre, C. glomerata Baker, Lucilia breweri (Steyerm. and Maguire)			R										R	Native
Asteroideae	Gnaphalieae	Chionolaena lychnophorioides Sch. Bip.	Chionolaena	lychnophorioides	Sch. Bip.	Jahresber. Pollichia	20–21	391		1863					R											Endemic
Asteroideae	Gnaphalieae	Chionolaena phylicoides (Gardner) Baker	Chionolaena	phylicoides	(Gardner) Baker	Fl. Bras.	6(3)	131		1882					R											Endemic
Asteroideae	Gnaphalieae	Chionolaena wittigiana Baker	Chionolaena	wittigiana	Baker	Fl. Bras.	6(3)	129		1882					R											Endemic
Vernonioideae	Liabeae	Chionopappus benthamii S.F. Blake	Chionopappus	benthamii	S.F. Blake	J. Wash. Acad. Sci.	25(11)	492		1935												R				Endemic
Vernonioideae	Vernonieae	Chresta angustifolia Gardner	Chresta	angustifolia	Gardner	London J. Bot.	1	240	pl. 8	1842					R											Endemic
Vernonioideae	Vernonieae	Chresta artemisiifolia Siniscalchi & Loeuille	Chresta	artemisiifolia	Siniscalchi & Loeuille	Phytotaxa	399(2)	120	f. 1, 2	2019					R											Endemic
Vernonioideae	Vernonieae	Chresta curumbensis (Philipson) H. Rob.	Chresta	curumbensis	(Philipson) H. Rob.	Phytologia	45(2)	91		1980					R											Endemic
Vernonioideae	Vernonieae	Chresta exsucca DC.	Chresta	exsucca	DC.	Prodr. [A. P. de Candolle]	5	85		1836				R	R											Native
Vernonioideae	Vernonieae	Chresta filicifolia Siniscalchi & Loeuille	Chresta	filicifolia	Siniscalchi & Loeuille	Phytotaxa	244(1)	81		2016					R											Endemic
Vernonioideae	Vernonieae	Chresta harleyi H. Rob.	Chresta	harleyi	H. Rob.	Phytologia	53(6)	385		1983					R											Endemic
Vernonioideae	Vernonieae	Chresta hatschbachii H. Rob.	Chresta	hatschbachii	H. Rob.	Phytologia	87(2)	83	f. 1	2005					R											Endemic
Vernonioideae	Vernonieae	Chresta heteropappa Siniscalchi & Loeuille	Chresta	heteropappa	Siniscalchi & Loeuille	Syst. Bot.	43(4)	1061	f. 1–3	2018					R											Endemic
Vernonioideae	Vernonieae	Chresta martii (DC.) H. Rob.	Chresta	martii	(DC.) H. Rob.	Phytologia	45(2)	91		1980					R											Endemic
Vernonioideae	Vernonieae	Chresta pinnatifida (Philipson) H. Rob.	Chresta	pinnatifida	(Philipson) H. Rob.	Phytologia	78(5)	384		1995					R											Endemic
Vernonioideae	Vernonieae	Chresta plantaginifolia (Less.) Gardner	Chresta	plantaginifolia	(Less.) Gardner	London J. Bot.	1	241		1842					R											Endemic
Vernonioideae	Vernonieae	Chresta pycnocephala DC.	Chresta	pycnocephala	DC.	Prodr. [A. P. de Candolle]	5	85		1836					R											Endemic
Vernonioideae	Vernonieae	Chresta scapigera (Less.) Gardner	Chresta	scapigera	(Less.) Gardner	London J. Bot.	1	241		1842					R											Endemic
Vernonioideae	Vernonieae	Chresta souzae H. Rob.	Chresta	souzae	H. Rob.	Phytologia	45(2)	92		1980					R											Endemic
Vernonioideae	Vernonieae	Chresta speciosa Gardner	Chresta	speciosa	Gardner	London J. Bot.	1	240		1842					R											Endemic
Vernonioideae	Vernonieae	Chresta sphaerocephala DC.	Chresta	sphaerocephala	DC.	Prodr. [A. P. de Candolle]	5	85		1836					R											Endemic
Vernonioideae	Vernonieae	Chresta subverticillata Siniscalchi & Loeuille	Chresta	subverticillata	Siniscalchi & Loeuille	Syst. Bot.	43(4)	1065	f. 4–6	2018					R											Endemic
Asteroideae	Eupatorieae	Chromolaena adenolepis (Sch. Bip. ex Baker) R.M. King & H. Rob.	Chromolaena	adenolepis	(Sch. Bip. ex Baker) R.M. King & H. Rob.	Phytologia	20(3)	198		1970					R											Endemic
Asteroideae	Eupatorieae	Chromolaena alvimii R.M. King & H. Rob.	Chromolaena	alvimii	R.M. King & H. Rob.	Phytologia	47(3)	231		1980					R											Endemic
Asteroideae	Eupatorieae	Chromolaena anachoretica (B.L. Rob.) R.M. King & H. Rob.	Chromolaena	anachoretica	(B.L. Rob.) R.M. King & H. Rob.	Phytologia	47(3)	230		1980												R				Endemic
Asteroideae	Eupatorieae	Chromolaena aridicola V.M. Badillo	Chromolaena	aridicola	V.M. Badillo	Ernstia	33	6		1985															R	Endemic
Asteroideae	Eupatorieae	Chromolaena arnottiana (Griseb.) R.M. King & H. Rob.	Chromolaena	arnottiana	(Griseb.) R.M. King & H. Rob.	Phytologia	20(3)	198		1970	Eupatorium arnottianum Griseb.		R	R												Native
Asteroideae	Eupatorieae	Chromolaena arrayana (Gardner) R.M. King & H. Rob.	Chromolaena	arrayana	(Gardner) R.M. King & H. Rob.	Phytologia	20(3)	198		1970					R											Endemic
Asteroideae	Eupatorieae	Chromolaena ascendens (Sch. Bip. ex Baker) R.M. King & H. Rob.	Chromolaena	ascendens	(Sch. Bip. ex Baker) R.M. King & H. Rob.	Phytologia	20(3)	199		1970					R											Endemic
Asteroideae	Eupatorieae	Chromolaena asperrima (Sch. Bip. ex Baker) R.M. King & H. Rob.	Chromolaena	asperrima	(Sch. Bip. ex Baker) R.M. King & H. Rob.	Phytologia	47(3)	230		1980				R							R					Native
Asteroideae	Eupatorieae	Chromolaena austera (B.L. Rob.) R.M. King & H. Rob.	Chromolaena	austera	(B.L. Rob.) R.M. King & H. Rob.	Phytologia	20(3)	199		1970				R												Endemic
Asteroideae	Eupatorieae	Chromolaena baccharidifolia Rodr.-Cabeza & S. Díaz	Chromolaena	baccharidifolia	Rodr.-Cabeza & S. Díaz	Revista Acad. Colomb. Ci. Exact.	37(142)	22		2013							R									Endemic
Asteroideae	Eupatorieae	Chromolaena bangii (Rusby) R.M. King & H. Rob.	Chromolaena	bangii	(Rusby) R.M. King & H. Rob.	Phytologia	20(3)	199		1970				R								R				Native
Asteroideae	Eupatorieae	Chromolaena barbacensis (Hieron.) R.M. King & H. Rob.	Chromolaena	barbacensis	(Hieron.) R.M. King & H. Rob.	Phytologia	20(3)	199		1970					R						R					Native
Asteroideae	Eupatorieae	Chromolaena barrosoae R.M. King & H. Rob.	Chromolaena	barrosoae	R.M. King & H. Rob.	Phytologia	47(3)	232		1980					R											Endemic
Asteroideae	Eupatorieae	Chromolaena bathyphlebia (B.L. Rob.) R.M. King & H. Rob.	Chromolaena	bathyphlebia	(B.L. Rob.) R.M. King & H. Rob.	Phytologia	20(3)	199		1970															R	Endemic
Asteroideae	Eupatorieae	Chromolaena beckii R.M. King & H. Rob.	Chromolaena	beckii	R.M. King & H. Rob.	Phytologia	51(3)	172		1982				R												Endemic
Asteroideae	Eupatorieae	Chromolaena brunneola (Baker) R.M. King & H. Rob.	Chromolaena	brunneola	(Baker) R.M. King & H. Rob.	Phytologia	47(3)	230		1980					R											Endemic
Asteroideae	Eupatorieae	Chromolaena bullata (Klatt) R.M. King & H. Rob.	Chromolaena	bullata	(Klatt) R.M. King & H. Rob.	Phytologia	20(3)	199		1970							R									Endemic	Least Concern
Asteroideae	Eupatorieae	Chromolaena caaguazuensis (Hieron.) R.M. King & H. Rob.	Chromolaena	caaguazuensis	(Hieron.) R.M. King & H. Rob.	Phytologia	20(3)	199		1970	Eupatorium caaguazuense Hieron.	Eupatorium caaguazuense Hieron. var. crassifolium Chodat; Eupatorium caaguazuense Hieron. var. hirsutum Hassl	R		R						R			R		Native
Asteroideae	Eupatorieae	Chromolaena caldensis (B.L. Rob.) R.M. King & H. Rob.	Chromolaena	caldensis	(B.L. Rob.) R.M. King & H. Rob.	Phytologia	49(1)	4		1981							R									Endemic
Asteroideae	Eupatorieae	Chromolaena callilepis (Sch. Bip. ex Baker) R.M. King & H. Rob.	Chromolaena	callilepis	(Sch. Bip. ex Baker) R.M. King & H. Rob.	Phytologia	20(3)	199		1970		Eupatorium paucicapitulatum Hieron., Eupatorium polyanthum Sch. Bip. ex Baker			R									R		Native
Asteroideae	Eupatorieae	Chromolaena campestris (DC.) R.M. King & H. Rob.	Chromolaena	campestris	(DC.) R.M. King & H. Rob.	Phytologia	20(3)	200		1970				R	R											Native
Asteroideae	Eupatorieae	Chromolaena chaseae (B.L. Rob.) R.M. King & H. Rob.	Chromolaena	chaseae	(B.L. Rob.) R.M. King & H. Rob.	Phytologia	20(3)	200		1970				R	R											Native
Asteroideae	Eupatorieae	Chromolaena christieana (Baker) R.M. King & H. Rob.	Chromolaena	christieana	(Baker) R.M. King & H. Rob.	Phytologia	20(3)	200		1970	Eupatorium christieanum Baker	Eupatorium laevigatulum B.L. Rob.	R	R	R						R					Native
Asteroideae	Eupatorieae	Chromolaena chrysosticta (B.L. Rob.) R.M. King & H. Rob.	Chromolaena	chrysosticta	(B.L. Rob.) R.M. King & H. Rob.	Phytologia	20(3)	200		1970							R									Endemic
Asteroideae	Eupatorieae	Chromolaena cinereoviridis (Sch. Bip. ex Baker) R.M. King & H. Rob.	Chromolaena	cinereoviridis	(Sch. Bip. ex Baker) R.M. King & H. Rob.	Phytologia	20(3)	200		1970					R											Endemic
Asteroideae	Eupatorieae	Chromolaena columbiana (Heering) R.M. King & H. Rob.	Chromolaena	columbiana	(Heering) R.M. King & H. Rob.	Phytologia	20(3)	200		1970							R								R	Native
Asteroideae	Eupatorieae	Chromolaena congesta (Hook. & Arn.) R.M. King & H. Rob.	Chromolaena	congesta	(Hook. & Arn.) R.M. King & H. Rob.	Phytologia	20(3)	200		1970					R											Endemic
Asteroideae	Eupatorieae	Chromolaena connivens (Rusby) R.M. King & H. Rob.	Chromolaena	connivens	(Rusby) R.M. King & H. Rob.	Phytologia	20(3)	200		1970	Eupatorium connivens Rusby	Eupatorium cochabambense Hieron.	R	R								R				Native
Asteroideae	Eupatorieae	Chromolaena corymbosa (Aubl.) R.M. King & H. Rob.	Chromolaena	corymbosa	(Aubl.) R.M. King & H. Rob.	Phytologia	20(3)	200		1970									R							Endemic
Asteroideae	Eupatorieae	Chromolaena costatipes (B.L. Rob.) R.M. King & H. Rob.	Chromolaena	costatipes	(B.L. Rob.) R.M. King & H. Rob.	Phytologia	49(1)	4		1981					R											Endemic
Asteroideae	Eupatorieae	Chromolaena cryptantha (Sch. Bip. ex Baker) R.M. King & H. Rob.	Chromolaena	cryptantha	(Sch. Bip. ex Baker) R.M. King & H. Rob.	Phytologia	47(3)	230		1980					R											Endemic
Asteroideae	Eupatorieae	Chromolaena cylindrocephala (Sch. Bip. ex Baker) R.M. King & H. Rob.	Chromolaena	cylindrocephala	(Sch. Bip. ex Baker) R.M. King & H. Rob.	Phytologia	47(3)	230		1980					R											Endemic
Asteroideae	Eupatorieae	Chromolaena densiflora (Morong) R.M. King & H. Rob.	Chromolaena	densiflora	(Morong) R.M. King & H. Rob.	Phytologia	20(3)	200		1970				R												Endemic
Asteroideae	Eupatorieae	Chromolaena desmocephala (B.L. Rob.) R.M. King & H. Rob.	Chromolaena	desmocephala	(B.L. Rob.) R.M. King & H. Rob.	Phytologia	49(1)	4		1981				R												Endemic
Asteroideae	Eupatorieae	Chromolaena diaphanophlebia (B.L. Rob.) R.M. King & H. Rob.	Chromolaena	diaphanophlebia	(B.L. Rob.) R.M. King & H. Rob.	Phytologia	47(3)	231		1980							R									Endemic
Asteroideae	Eupatorieae	Chromolaena elliptica (Hook. & Arn.) R.M. King & H. Rob.	Chromolaena	elliptica	(Hook. & Arn.) R.M. King & H. Rob.	Phytologia	20(3)	200		1970	Eupatorium ellipticum Hook. & Arn.	Eupatorium rhinanthaceum DC. var. latisquamulosum Hieron; Eupatorium latisquamulosum (Hieron.) Malme; Chromolaena latisquamulosa (Hieron.) R.M. King & H. Rob	R		R						R					Native
Asteroideae	Eupatorieae	Chromolaena epaleacea Gardner	Chromolaena	epaleacea	Gardner	London J. Bot.	6	436		1847				R	R											Native
Asteroideae	Eupatorieae	Chromolaena eripsima (B.L. Rob.) R.M. King & H. Rob.	Chromolaena	eripsima	(B.L. Rob.) R.M. King & H. Rob.	Phytologia	20(3)	201		1970												R				Endemic
Asteroideae	Eupatorieae	Chromolaena extensa (Gardner) R.M. King & H. Rob.	Chromolaena	extensa	(Gardner) R.M. King & H. Rob.	Phytologia	20(3)	201		1970				R	R							R				Native
Asteroideae	Eupatorieae	Chromolaena farinosa (B.L. Rob.) R.M. King & H. Rob.	Chromolaena	farinosa	(B.L. Rob.) R.M. King & H. Rob.	Phytologia	20(3)	201		1970															R	Endemic
Asteroideae	Eupatorieae	Chromolaena ferruginea R.M. King & H. Rob.	Chromolaena	ferruginea	R.M. King & H. Rob.	Phytologia	49(1)	4		1981	Eupatorium ferrugineum Gardner				R						R					Native
Asteroideae	Eupatorieae	Chromolaena gentianoides (B.L. Rob.) R.M. King & H. Rob.	Chromolaena	gentianoides	(B.L. Rob.) R.M. King & H. Rob.	Phytologia	47(3)	231		1980					R											Endemic
Asteroideae	Eupatorieae	Chromolaena haughtii (B.L. Rob.) R.M. King & H. Rob.	Chromolaena	haughtii	(B.L. Rob.) R.M. King & H. Rob.	Phytologia	20(3)	201		1970	Eupatorium haughtii B.L. Rob.							R				R				Native
Asteroideae	Eupatorieae	Chromolaena herzogii (B.L. Rob.) R.M. King & H. Rob.	Chromolaena	herzogii	(B.L. Rob.) R.M. King & H. Rob.	Phytologia	20(3)	201		1970				R												Endemic
Asteroideae	Eupatorieae	Chromolaena hirsuta (Hook. & Arn.) R.M. King & H. Rob.	Chromolaena	hirsuta	(Hook. & Arn.) R.M. King & H. Rob.	Phytologia	20(3)	201		1970	Eupatorium hirsutum Hook. & Arn., Eupatorium congestum var. hirsutum (Hook. & Arn.) Cabrera	Eupatorium subhastatum Hook. & Arn; Eupatorium tozziifolium DC. var. subpetiolatum Chodat; Eupatorium hirsutum Hook. & Arn. var. triseriale Hassl; Eupatorium congestum var. truncatum Hassl	R	R	R						R			R		Native
Asteroideae	Eupatorieae	Chromolaena hookeriana (Griseb.) R.M. King & H. Rob.	Chromolaena	hookeriana	(Griseb.) R.M. King & H. Rob.	Phytologia	47(3)	231		1980	Eupatorium hookerianum Griseb.	Eupatorium ciliatum Hook. & Arn.; Eupatorium conyzoides Mill. var. ciliatum (Hook. & Arn.) Hieron; Eupatorium jujuiense Hieron; Eupatorium hookerianum Griseb. var. jujuiense (Hieron.) Cabrera & Vittet; Chromolaena jujuiense (Hieron.) R.M. King & H. Rob.	R	R												Native
Asteroideae	Eupatorieae	Chromolaena horminoides DC.	Chromolaena	horminoides	DC.	Prodr. [A. P. de Candolle]	5	133		1836					R											Endemic
Asteroideae	Eupatorieae	Chromolaena hypericifolia (Kunth) R.M. King & H. Rob.	Chromolaena	hypericifolia	(Kunth) R.M. King & H. Rob.	Phytologia	20(3)	202		1970							R									Endemic
Asteroideae	Eupatorieae	Chromolaena iridolepis (B.L. Rob.) R.M. King & H. Rob.	Chromolaena	iridolepis	(B.L. Rob.) R.M. King & H. Rob.	Phytologia	20(3)	202		1970							R									Endemic
Asteroideae	Eupatorieae	Chromolaena ivifolia (L.) R.M. King & H. Rob.	Chromolaena	ivifolia	(L.) R.M. King & H. Rob.	Phytologia	20(3)	202		1970	Eupatorium ivifolium L.	Eupatorium affine Hook. & Arn; Eupatorium conyzoides Mill. var. affine (Hook. & Arn.) Baker; Eupatorium callilepis Sch. Bip. ex Baker var. oligocephalum Griseb.; Eupatorium paucicapitulatum Hieron; Eupatorium luquense Chodat; Chromolaena luquensis (Chodat) R.M. King & H. Rob.; Eupatorium ivifolium L. var. foliosum Chodat; Eupatorium ivifolium L. var. hirsutum Hassl; Eupatorium ivifolium L. var. p…	R	R	R		R			R	R	R		R	R	Native
Asteroideae	Eupatorieae	Chromolaena jelskii (Hieron.) R.M. King & H. Rob.	Chromolaena	jelskii	(Hieron.) R.M. King & H. Rob.	Phytologia	20(3)	202		1970												R				Endemic
Asteroideae	Eupatorieae	Chromolaena jujuiensis (Hieron.) R.M. King & H. Rob.	Chromolaena	jujuiensis	(Hieron.) R.M. King & H. Rob.	Phytologia	20(3)	202		1970				R												Endemic
Asteroideae	Eupatorieae	Chromolaena kleinii (Cabrera) R.M. King & H. Rob.	Chromolaena	kleinii	(Cabrera) R.M. King & H. Rob.	Phytologia	20(3)	202		1970					R											Endemic
Asteroideae	Eupatorieae	Chromolaena laevigata (Lam.) R.M. King & H. Rob.	Chromolaena	laevigata	(Lam.) R.M. King & H. Rob.	Phytologia	20(3)	202		1970	Eupatorium laevigatum Lam., Osmia laevigata (Lam.) Sch. Bip.		R	R	R		R	R	R	R	R	R	R	R	R	Native
Asteroideae	Eupatorieae	Chromolaena larensis (V.M. Badillo) R.M. King & H. Rob.	Chromolaena	larensis	(V.M. Badillo) R.M. King & H. Rob.	Phytologia	35(6)	498		1977							R								R	Native
Asteroideae	Eupatorieae	Chromolaena latisquamulosa (Hieron.) R.M. King & H. Rob.	Chromolaena	latisquamulosa	(Hieron.) R.M. King & H. Rob.	Phytologia	20(3)	202		1970					R											Endemic
Asteroideae	Eupatorieae	Chromolaena leivensis (Hieron.) R.M. King & H. Rob.	Chromolaena	leivensis	(Hieron.) R.M. King & H. Rob.	Phytologia	20(3)	202		1970							R									Endemic	Least Concern
Asteroideae	Eupatorieae	Chromolaena lepidodisca S. Díaz & Rodr.-Cabeza	Chromolaena	lepidodisca	S. Díaz & Rodr.-Cabeza	Revista Acad. Colomb. Ci. Exact.	37(142)	22		2013							R									Endemic
Asteroideae	Eupatorieae	Chromolaena leptocephala (DC.) R.M. King & H. Rob.	Chromolaena	leptocephala	(DC.) R.M. King & H. Rob.	Phytologia	20(3)	202		1970	Eupatorium leptocephalum DC., Osmia leptocephala (DC.) Sch. Bip.			R			R	R				R			R	Native
Asteroideae	Eupatorieae	Chromolaena leucocephala Gardner	Chromolaena	leucocephala	Gardner	London J. Bot.	5	465		1846					R											Endemic
Asteroideae	Eupatorieae	Chromolaena lilacina (Hieron.) R.M. King & H. Rob.	Chromolaena	lilacina	(Hieron.) R.M. King & H. Rob.	Phytologia	20(3)	202		1970					R											Endemic
Asteroideae	Eupatorieae	Chromolaena macarenensis Rodr.-Cabeza & S. Díaz	Chromolaena	macarenensis	Rodr.-Cabeza & S. Díaz	Revista Acad. Colomb. Ci. Exact.	37(142)	24		2013							R									Endemic
Asteroideae	Eupatorieae	Chromolaena mallota (B.L. Rob.) R.M. King & H. Rob.	Chromolaena	mallota	(B.L. Rob.) R.M. King & H. Rob.	Phytologia	20(3)	203		1970				R												Endemic
Asteroideae	Eupatorieae	Chromolaena margaritensis (Hassl.) R.M. King & H. Rob.	Chromolaena	margaritensis	(Hassl.) R.M. King & H. Rob.	Phytologia	20(3)	203		1970					R						R					Native
Asteroideae	Eupatorieae	Chromolaena mattogrossensis (Hieron.) R.M. King & H. Rob.	Chromolaena	mattogrossensis	(Hieron.) R.M. King & H. Rob.	Phytologia	20(3)	203		1970				R	R											Native
Asteroideae	Eupatorieae	Chromolaena maximiliani (Schrad. ex DC.) R.M. King & H. Rob.	Chromolaena	maximiliani	(Schrad. ex DC.) R.M. King & H. Rob.	Phytologia	49(1)	4		1981					R				R						R	Native
Asteroideae	Eupatorieae	Chromolaena meridensis (B.L. Rob.) R.M. King & H. Rob.	Chromolaena	meridensis	(B.L. Rob.) R.M. King & H. Rob.	Phytologia	20(3)	203		1970							R								R	Native
Asteroideae	Eupatorieae	Chromolaena minasgeraesensis (Hieron.) R.M. King & H. Rob.	Chromolaena	minasgeraesensis	(Hieron.) R.M. King & H. Rob.	Phytologia	47(3)	231		1980					R											Endemic
Asteroideae	Eupatorieae	Chromolaena molina (B.L. Rob.) R.M. King & H. Rob.	Chromolaena	molina	(B.L. Rob.) R.M. King & H. Rob.	Phytologia	20(3)	203		1970															R	Endemic
Asteroideae	Eupatorieae	Chromolaena morii R.M. King & H. Rob.	Chromolaena	morii	R.M. King & H. Rob.	Phytologia	47(3)	234		1980					R											Endemic
Asteroideae	Eupatorieae	Chromolaena moritensis (Aristeg.) R.M. King & H. Rob.	Chromolaena	moritensis	(Aristeg.) R.M. King & H. Rob.	Phytologia	35(6)	498		1977															R	Endemic
Asteroideae	Eupatorieae	Chromolaena moritziana (Sch. Bip. ex Hieron.) R.M. King & H. Rob.	Chromolaena	moritziana	(Sch. Bip. ex Hieron.) R.M. King & H. Rob.	Phytologia	20(3)	203		1970							R								R	Native
Asteroideae	Eupatorieae	Chromolaena mucronata (Gardner) R.M. King & H. Rob.	Chromolaena	mucronata	(Gardner) R.M. King & H. Rob.	Phytologia	37(5)	457		1977				R	R											Native
Asteroideae	Eupatorieae	Chromolaena multiflosculosa (DC.) R.M. King & H. Rob.	Chromolaena	multiflosculosa	(DC.) R.M. King & H. Rob.	Phytologia	20(3)	203		1970					R											Endemic
Asteroideae	Eupatorieae	Chromolaena myriadenia R.M. King & H. Rob.	Chromolaena	myriadenia	R.M. King & H. Rob.	Phytologia	47(3)	235		1980					R											Endemic
Asteroideae	Eupatorieae	Chromolaena myriocephala (Gardner) R.M. King & H. Rob.	Chromolaena	myriocephala	(Gardner) R.M. King & H. Rob.	Phytologia	20(3)	203		1970					R											Endemic
Asteroideae	Eupatorieae	Chromolaena odorata (L.) R.M. King & H. Rob.	Chromolaena	odorata	(L.) R.M. King & H. Rob.	Phytologia	20(3)	204		1970	Eupatorium odoratum L., Osmia odorata (L.) Sch. Bip.	Eupatorium conyzoides Mill; Eupatorium conyzoides Vahl; Eupatorium conyzoides Mill. var. scaberulum Hassl	R	R	R		R	R	R	R	R	R	R		R	Native
Asteroideae	Eupatorieae	Chromolaena orbignyana (Klatt) R.M. King & H. Rob.	Chromolaena	orbignyana	(Klatt) R.M. King & H. Rob.	Phytologia	20(3)	204		1970	Eupatorium orbignyanum Klatt	Eupatorium densiflorum Morong; Eupatorium oxylepis DC. var. densiflorum (Morong) Hassl; Chromolaena densiflora (Morong) R.M. King & H. Rob.	R		R						R					Native
Asteroideae	Eupatorieae	Chromolaena oxylepis (DC.) R.M. King & H. Rob.	Chromolaena	oxylepis	(DC.) R.M. King & H. Rob.	Phytologia	20(3)	204		1970				R	R						R					Native
Asteroideae	Eupatorieae	Chromolaena oyadensis (Hieron.) R.M. King & H. Rob.	Chromolaena	oyadensis	(Hieron.) R.M. King & H. Rob.	Phytologia	20(3)	204		1970				R												Endemic
Asteroideae	Eupatorieae	Chromolaena palmaris (Sch. Bip. ex Baker) R.M. King & H. Rob.	Chromolaena	palmaris	(Sch. Bip. ex Baker) R.M. King & H. Rob.	Phytologia	20(3)	204		1970					R											Endemic
Asteroideae	Eupatorieae	Chromolaena paraguariensis (Hieron.) R.M. King & H. Rob.	Chromolaena	paraguariensis	(Hieron.) R.M. King & H. Rob.	Phytologia	20(3)	204		1970					R											Endemic
Asteroideae	Eupatorieae	Chromolaena parviceps (Malme) R.M. King & H. Rob.	Chromolaena	parviceps	(Malme) R.M. King & H. Rob.	Phytologia	20(3)	204		1970					R											Endemic
Asteroideae	Eupatorieae	Chromolaena pedalis (Sch. Bip. ex Baker) R.M. King & H. Rob.	Chromolaena	pedalis	(Sch. Bip. ex Baker) R.M. King & H. Rob.	Phytologia	20(3)	204		1970					R											Endemic
Asteroideae	Eupatorieae	Chromolaena pedunculosa (Hook. & Arn.) R.M. King & H. Rob.	Chromolaena	pedunculosa	(Hook. & Arn.) R.M. King & H. Rob.	Phytologia	47(3)	231		1980	Eupatorium pedunculosum Hook. & Arn.	Eupatorium conyzoides Mill. var. foliatum Sch. Bip. ex Baker; Eupatorium foliatum (Baker) Hieron; Chromolaena foliata (Baker) R.M. King & H. Rob.; Eupatorium foliatum (Baker) Hieron. var. incanum Hieron; Eupatorium paraguariense Hieron; Eupatorium oxylepis DC. var. paraguariense (Hieron.) Hassl; Chromolaena paraguariensis (Hieron.) R.M. King & H. Rob.	R		R						R					Native
Asteroideae	Eupatorieae	Chromolaena pellia (Klatt) R.M. King & H. Rob.	Chromolaena	pellia	(Klatt) R.M. King & H. Rob.	Phytologia	20(3)	204		1970							R								R	Native
Asteroideae	Eupatorieae	Chromolaena perforata (Sch. Bip. ex Baker) R.M. King & H. Rob.	Chromolaena	perforata	(Sch. Bip. ex Baker) R.M. King & H. Rob.	Phytologia	20(3)	205		1970					R											Endemic
Asteroideae	Eupatorieae	Chromolaena perglabra (B.L. Rob.) R.M. King & H. Rob.	Chromolaena	perglabra	(B.L. Rob.) R.M. King & H. Rob.	Phytologia	20(3)	205		1970							R									Endemic	Least Concern
Asteroideae	Eupatorieae	Chromolaena perijaensis R.M. King & H. Rob.	Chromolaena	perijaensis	R.M. King & H. Rob.	Phytologia	47(3)	236		1980							R									Endemic
Asteroideae	Eupatorieae	Chromolaena persericea R.M. King & H. Rob.	Chromolaena	persericea	R.M. King & H. Rob.	Phytologia	47(3)	237		1980							R								R	Native
Asteroideae	Eupatorieae	Chromolaena pharcidodes (B.L. Rob.) R.M. King & H. Rob.	Chromolaena	pharcidodes	(B.L. Rob.) R.M. King & H. Rob.	Phytologia	20(3)	205		1970	Eupatorium pharcidodes B.L. Rob.				R					R					R	Native
Asteroideae	Eupatorieae	Chromolaena ponsae V.M. Badillo	Chromolaena	ponsae	V.M. Badillo	Ernstia n.s.,	5(2)	82		1995															R	Endemic
Asteroideae	Eupatorieae	Chromolaena porphyrolepis (Baker) R.M. King & H. Rob.	Chromolaena	porphyrolepis	(Baker) R.M. King & H. Rob.	Phytologia	20(3)	205		1970					R											Endemic
Asteroideae	Eupatorieae	Chromolaena pseudinsignis R.M. King & H. Rob.	Chromolaena	pseudinsignis	R.M. King & H. Rob.	Phytologia	47(3)	238		1980					R											Endemic
Asteroideae	Eupatorieae	Chromolaena punctulata (DC.) R.M. King & H. Rob.	Chromolaena	punctulata	(DC.) R.M. King & H. Rob.	Phytologia	20(3)	205		1970					R											Endemic
Asteroideae	Eupatorieae	Chromolaena pungens (Gardner) R.M. King & H. Rob.	Chromolaena	pungens	(Gardner) R.M. King & H. Rob.	Phytologia	47(3)	231		1980					R											Endemic
Asteroideae	Eupatorieae	Chromolaena revoluta (Gardner) R.M. King & H. Rob.	Chromolaena	revoluta	(Gardner) R.M. King & H. Rob.	Phytologia	20(3)	205		1970					R											Endemic
Asteroideae	Eupatorieae	Chromolaena rhinanthacea (DC.) R.M. King & H. Rob.	Chromolaena	rhinanthacea	(DC.) R.M. King & H. Rob.	Phytologia	20(3)	205		1970					R						R					Native
Asteroideae	Eupatorieae	Chromolaena rojasii (Hassl.) R.M. King & H. Rob.	Chromolaena	rojasii	(Hassl.) R.M. King & H. Rob.	Phytologia	20(3)	205		1970											R					Endemic
Asteroideae	Eupatorieae	Chromolaena roseorum (B.L. Rob.) R.M. King & H. Rob.	Chromolaena	roseorum	(B.L. Rob.) R.M. King & H. Rob.	Phytologia	20(3)	205		1970	Eupatorium roseorum B.L. Rob.			R				R				R				Native
Asteroideae	Eupatorieae	Chromolaena sagittifera (B.L. Rob.) R.M. King & H. Rob.	Chromolaena	sagittifera	(B.L. Rob.) R.M. King & H. Rob.	Phytologia	20(3)	206		1970					R											Endemic
Asteroideae	Eupatorieae	Chromolaena santanensis (Aristeg.) R.M. King & H. Rob.	Chromolaena	santanensis	(Aristeg.) R.M. King & H. Rob.	Phytologia	20(3)	206		1970							R								R	Native
Asteroideae	Eupatorieae	Chromolaena scabra (L. f.) R.M. King & H. Rob.	Chromolaena	scabra	(L. f.) R.M. King & H. Rob.	Phytologia	20(3)	206		1970	Eupatorium scabrum L. f., Osmia scabra (L. f.) Sch. Bip.						R	R								Native
Asteroideae	Eupatorieae	Chromolaena serratuloides (Kunth) R.M. King & H. Rob.	Chromolaena	serratuloides	(Kunth) R.M. King & H. Rob.	Phytologia	49(1)	4		1981	Eupatorium serratuloides Kunth, Osmia serratuloides (Kunth) Sch. Bip.							R				R				Native
Asteroideae	Eupatorieae	Chromolaena squalida (DC.) R.M. King & H. Rob.	Chromolaena	squalida	(DC.) R.M. King & H. Rob.	Phytologia	20(3)	206		1970		Osmia ramosissimum (Gardner) Sch. Bip.		R	R		R			R	R	R	R		R	Native
Asteroideae	Eupatorieae	Chromolaena squarroso-ramosa (Hieron.) R.M. King & H. Rob.	Chromolaena	squarroso-ramosa	(Hieron.) R.M. King & H. Rob.	Phytologia	20(3)	206		1970	Eupatorium squarrosoramosum Hieron.	Eupatorium oyadense Hieron; Chromolaena oyadensis (Hieron.) R.M. King & H. Rob; Eupatorium oyadense Hieron. var. paraguayense Hieron	R	R	R						R					Native
Asteroideae	Eupatorieae	Chromolaena squarrulosa (Hook. & Arn.) R.M. King & H. Rob.	Chromolaena	squarrulosa	(Hook. & Arn.) R.M. King & H. Rob.	Phytologia	20(3)	206		1970	Eupatorium squarrulosum Hook. & Arn.	Eupatorium congestum Hook. & Arn; Chromolaena congesta (Hook. & Arn.) R. M. King & H. Rob.; Eupatorium bracteatum Hook. & Arn.; Eupatorium tozziifolium DC; Eupatorium ascendens Sch. Bip. ex Baker; Chromolaena ascendens (Baker) R.M. King & H. Rob; Eupatorium caaguazuense Hieron. var. nervosum Chodat; Eupatorium ascendens Sch. Bip. ex Baker var. paucisetosum B.L. Rob.	R		R						R					Native
Asteroideae	Eupatorieae	Chromolaena stachyophylla (Spreng.) R.M. King & H. Rob.	Chromolaena	stachyophylla	(Spreng.) R.M. King & H. Rob.	Phytologia	20(3)	206		1970				R	R											Native
Asteroideae	Eupatorieae	Chromolaena steyermarkiana (V.M. Badillo) R.M. King & H. Rob.	Chromolaena	steyermarkiana	(V.M. Badillo) R.M. King & H. Rob.	Phytologia	35(6)	498		1977															R	Endemic
Asteroideae	Eupatorieae	Chromolaena subscandens (Hieron.) R.M. King & H. Rob.	Chromolaena	subscandens	(Hieron.) R.M. King & H. Rob.	Phytologia	20(3)	206		1970				R			R					R			R	Native
Asteroideae	Eupatorieae	Chromolaena tacotana (Klatt) R.M. King & H. Rob.	Chromolaena	tacotana	(Klatt) R.M. King & H. Rob.	Phytologia	20(3)	206		1970							R									Endemic	Least Concern
Asteroideae	Eupatorieae	Chromolaena tecta (Gardner) R.M. King & H. Rob.	Chromolaena	tecta	(Gardner) R.M. King & H. Rob.	Phytologia	20(3)	206		1970					R											Endemic
Asteroideae	Eupatorieae	Chromolaena tenuicapitulata (Hieron.) R.M. King & H. Rob.	Chromolaena	tenuicapitulata	(Hieron.) R.M. King & H. Rob.	Phytologia	20(3)	207		1970				R								R			R	Native
Asteroideae	Eupatorieae	Chromolaena ternicapitulata Pruski	Chromolaena	ternicapitulata	Pruski	Brittonia	44(2)	214		1992															R	Endemic
Asteroideae	Eupatorieae	Chromolaena thurnii (B.L. Rob.) R.M. King & H. Rob.	Chromolaena	thurnii	(B.L. Rob.) R.M. King & H. Rob.	Phytologia	20(3)	207		1970					R					R					R	Native
Asteroideae	Eupatorieae	Chromolaena toldensis (Hieron.) R.M. King & H. Rob.	Chromolaena	toldensis	(Hieron.) R.M. King & H. Rob.	Phytologia	20(3)	207		1970	Eupatorium toldense Hieron.		R	R												Native
Asteroideae	Eupatorieae	Chromolaena trujillensis (B.L. Rob.) R.M. King & H. Rob.	Chromolaena	trujillensis	(B.L. Rob.) R.M. King & H. Rob.	Phytologia	20(3)	207		1970															R	Endemic
Asteroideae	Eupatorieae	Chromolaena tunariensis (Hieron.) R.M. King & H. Rob.	Chromolaena	tunariensis	(Hieron.) R.M. King & H. Rob.	Phytologia	20(3)	207		1970	Eupatorium conyzoides var. tunariense Hieron.; Eupatorium tunariense (Hieron.) B.L. Rob.		R	R												Native
Asteroideae	Eupatorieae	Chromolaena tyleri (B.L. Rob.) R.M. King & H. Rob.	Chromolaena	tyleri	(B.L. Rob.) R.M. King & H. Rob.	Phytologia	20(3)	207		1970					R		R								R	Native
Asteroideae	Eupatorieae	Chromolaena ulei (Hieron.) R.M. King & H. Rob.	Chromolaena	ulei	(Hieron.) R.M. King & H. Rob.	Phytologia	20(3)	207		1970					R											Endemic
Asteroideae	Eupatorieae	Chromolaena uromeres (B.L. Rob.) R.M. King & H. Rob.	Chromolaena	uromeres	(B.L. Rob.) R.M. King & H. Rob.	Phytologia	20(3)	207		1970							R									Endemic
Asteroideae	Eupatorieae	Chromolaena urticoides (Sch. Bip. ex Hieron.) R.M. King & H. Rob.	Chromolaena	urticoides	(Sch. Bip. ex Hieron.) R.M. King & H. Rob.	Phytologia	20(3)	207		1970															R	Endemic
Asteroideae	Eupatorieae	Chromolaena verbenacea (DC.) R.M. King & H. Rob.	Chromolaena	verbenacea	(DC.) R.M. King & H. Rob.	Phytologia	20(3)	207		1970	Eupatorium verbenaceum DC.	Eupatorium rhodolepis Chodat	R		R						R			R		Native
Asteroideae	Eupatorieae	Chromolaena verticillata R.M. King & H. Rob.	Chromolaena	verticillata	R.M. King & H. Rob.	Phytologia	47(3)	239		1980					R											Endemic
Asteroideae	Eupatorieae	Chromolaena vindex (DC.) R.M. King & H. Rob.	Chromolaena	vindex	(DC.) R.M. King & H. Rob.	Phytologia	47(3)	231		1980					R											Endemic
Asteroideae	Eupatorieae	Chromolaena voglii (B.L. Rob.) H. Huber	Chromolaena	voglii	(B.L. Rob.) H. Huber	Mitt. Bot. Staatssamml. München	13	103		1977															R	Endemic
Asteroideae	Eupatorieae	Chromolaena xestolepidoides (Wurdack) R.M. King & H. Rob.	Chromolaena	xestolepidoides	(Wurdack) R.M. King & H. Rob.	Phytologia	35(6)	499		1977															R	Endemic
Asteroideae	Eupatorieae	Chromolaena xestolepis (B.L. Rob.) R.M. King & H. Rob.	Chromolaena	xestolepis	(B.L. Rob.) R.M. King & H. Rob.	Phytologia	20(3)	207		1970															R	Endemic
Asteroideae	Eupatorieae	Chromolaena xylorrhiza (Sch. Bip. ex Baker) R.M. King & H. Rob.	Chromolaena	xylorrhiza	(Sch. Bip. ex Baker) R.M. King & H. Rob.	Phytologia	20(3)	208		1970					R											Endemic
Vernonioideae	Vernonieae	Chronopappus bifrons (DC. ex Pers.) DC.	Chronopappus	bifrons	(DC. ex Pers.) DC.	Prodr. [A. P. de Candolle]	5	84		1836	Serratula bifrons DC. ex Pers., Heterocoma bifrons (DC. ex Pers.) DC.				R											Endemic
Vernonioideae	Liabeae	Chrysactinium acaule (Kunth) Wedd.	Chrysactinium	acaule	(Kunth) Wedd.	Chlor. Andina	1(7)	212		1857	Andromachia acaulis Kunth, Liabum acaule (Kunth) Less.							R				R				Native
Vernonioideae	Liabeae	Chrysactinium amphothrix (S.F. Blake) H. Rob. & Brettell	Chrysactinium	amphothrix	(S.F. Blake) H. Rob. & Brettell	Phytologia	28(1)	49		1974	Liabum amphothrix S.F. Blake,							R				R				Native
Vernonioideae	Liabeae	Chrysactinium breviscapum Sagást. & M.O. Dillon	Chrysactinium	breviscapum	Sagást. & M.O. Dillon	Arnaldoa	2(2)	31		1994												R				Endemic
Vernonioideae	Liabeae	Chrysactinium caulescens (Hieron.) H. Rob. & Brettell	Chrysactinium	caulescens	(Hieron.) H. Rob. & Brettell	Phytologia	28(1)	50		1974	Liabum caulescens Hieron.							R				R				Native
Vernonioideae	Liabeae	Chrysactinium hieracioides (Kunth) H. Rob. & Brettell	Chrysactinium	hieracioides	(Kunth) H. Rob. & Brettell	Phytologia	28(1)	50		1974	Andromachia hieracioides Kunth, Liabum hieracioides (Kunth) Less.							R				R				Native
Vernonioideae	Liabeae	Chrysactinium rosulatum (Hieron.) H. Rob. & Brettell	Chrysactinium	rosulatum	(Hieron.) H. Rob. & Brettell	Phytologia	28(1)	50		1974												R				Endemic
Vernonioideae	Liabeae	Chrysactinium wurdackii Zermoglio & V.A. Funk	Chrysactinium	wurdackii	Zermoglio & V.A. Funk	BioLlania (Ed. Espec.)	6	568		1997												R				Endemic
Asteroideae	Coreopsideae	Chrysanthellum fagerlindii Eliasson	Chrysanthellum	fagerlindii	Eliasson	Svensk Bot. Tidskr.	61(1)	91		1967								R								Endemic
Asteroideae	Coreopsideae	Chrysanthellum indicum DC.	Chrysanthellum	indicum	DC.	Prodr. [A. P. de Candolle]	5	631		1836		Adenospermum tuberculatum Hook. & Arn; Chrysanthellum tuberculatum (Hook. & Arn.) Cabrera; Hinterhubera kotschyi Sch. Bip. ex Hochst; Chrysanthellum boliviense Sch. Bip; Plagiocheilus erectus Rusby; Chrysanthellum weberbaueri I.C. Chung; Chrysanthellum argentinum Ariza & Cerana	R	R	R											Native
Asteroideae	Coreopsideae	Chrysanthellum pusillum Hook. f.	Chrysanthellum	pusillum	Hook. f.	Trans. Linn. Soc. London	20(2)	214		1847								R								Endemic	Least Concern
Asteroideae	Coreopsideae	Chrysanthellum tuberculatum (Hook. & Arn.) Cabrera	Chrysanthellum	tuberculatum	(Hook. & Arn.) Cabrera	Bol. Soc. Argent. Bot.	15(1)	117		1973				R												Endemic
Asteroideae	Coreopsideae	Chrysanthellum weberbaueri I.C. Chung	Chrysanthellum	weberbaueri	I.C. Chung	Phytologia	14(6)	321		1967												R				Endemic
Asteroideae	Gnaphalieae	Chryselium gnaphalioides (Kunth) Urtubey & S.E. Freire	Chryselium	gnaphalioides	(Kunth) Urtubey & S.E. Freire	Syst. Bot.	44(1)	236		2019	Helichrysum gnaphalioides Kunth, Antennaria gnaphalioides (Kunth) Standl. & R. Kunth, Gnaphalium gnaphalioides (Kunth) Beauverd, Leontopodium gnaphalioides (Kunth) Hieron.	Gnaphalium elichrysoides Willd. ex Spreng., Gnaphalium antennarioides DC.		R			R	R				R			R	Native
Vernonioideae	Vernonieae	Chrysolaena campestris (DC.) Dematt.	Chrysolaena	campestris	(DC.) Dematt.	Bol. Soc. Argent. Bot.	44(1-2)	150		2009	Vernonia campestris DC., Vernonia desertorum var. campestris (DC.) Baker				R											Endemic
Vernonioideae	Vernonieae	Chrysolaena cognata (Less.) Dematt.	Chrysolaena	cognata	(Less.) Dematt.	Bol. Soc. Argent. Bot.	44(1-2)	157		2009	Vernonia cognata Less., Cacalia cognata (Less.) Kuntze	Vernonia senecionea Mart. ex DC., Vernonia senecionea Mart. ex DC. var. adenocarpa DC., Vernonia cinerascens Sch.Bip. ex Baker, Vernonia senecionea Mart. ex DC. fo. calvata Chodat	R		R						R			R		Native
Vernonioideae	Vernonieae	Chrysolaena cordifolia Dematt.	Chrysolaena	cordifolia	Dematt.	Bol. Soc. Argent. Bot.	44(1-2)	155		2009		*No	R													Endemic
Vernonioideae	Vernonieae	Chrysolaena cristobaliana Dematt.	Chrysolaena	cristobaliana	Dematt.	Bol. Soc. Argent. Bot.	44(1-2)	138		2009					R											Endemic
Vernonioideae	Vernonieae	Chrysolaena desertorum (Mart. ex DC.) Dematt.	Chrysolaena	desertorum	(Mart. ex DC.) Dematt.	Ann. Bot. Fenn.	44(1)	62		2007				R	R						R					Native
Vernonioideae	Vernonieae	Chrysolaena dusenii (Malme) Dematt.	Chrysolaena	dusenii	(Malme) Dematt.	Bol. Soc. Argent. Bot.	44(1-2)	128		2009	Vernonia dusenii Malme				R											Endemic
Vernonioideae	Vernonieae	Chrysolaena flexuosa (Sims) H. Rob.	Chrysolaena	flexuosa	(Sims) H. Rob.	Proc. Biol. Soc. Washington	101(4)	956		1988	Vernonia flexuosa Sims, Cacalia flexuosa (Sims) Kuntze	Vernonia montevidensis Nees ex Otto & A.Dietr., Vernonia flexuosa Sims var. macrocephala Hieron., Vernonia flexuosa Sims var. microcephala Hieron., Vernonia flexuosa Sims var. glabra Arechav.	R		R						R			R		Native
Vernonioideae	Vernonieae	Chrysolaena glandulosa P.N. Soares & J.N. Nakaj.	Chrysolaena	glandulosa	P.N. Soares & J.N. Nakaj.	Phytotaxa	439(3)	296	f. 1–3	2020					R											Endemic
Vernonioideae	Vernonieae	Chrysolaena lithospermifolia (Hieron.) H. Rob.	Chrysolaena	lithospermifolia	(Hieron.) H. Rob.	Proc. Biol. Soc. Washington	101(4)	957		1988	Vernonia lithospermifolia Hieron.	Vernonia desertorum Mart. ex DC. var. polycephala Chodat	R		R						R					Native
Vernonioideae	Vernonieae	Chrysolaena nicolackii H. Rob.	Chrysolaena	nicolackii	H. Rob.	Proc. Biol. Soc. Washington	105(4)	660		1992					R											Endemic
Vernonioideae	Vernonieae	Chrysolaena obovata (Less.) Dematt.	Chrysolaena	obovata	(Less.) Dematt.	Bol. Soc. Argent. Bot.	44(1-2)	142		2009				R	R							R				Native
Vernonioideae	Vernonieae	Chrysolaena oligophylla (Vell.) H. Rob.	Chrysolaena	oligophylla	(Vell.) H. Rob.	Proc. Biol. Soc. Washington	101(4)	957		1988	Chrysocoma oligophylla Vell., Cacalia oligophylla (Vell.) Kuntze				R											Endemic
Vernonioideae	Vernonieae	Chrysolaena platensis (Spreng.) H. Rob.	Chrysolaena	platensis	(Spreng.) H. Rob.	Proc. Biol. Soc. Washington	101(4)	957		1988	Conyza platensis Spreng., Vernonia platensis (Spreng.) Less., Cacalia platensis (Spreng.) Kuntze	Vernonia virens Sch. Bip. ex Baker fo. robustior Chodat	R	R	R						R			R		Native
Vernonioideae	Vernonieae	Chrysolaena propinqua (Hieron.) H. Rob.	Chrysolaena	propinqua	(Hieron.) H. Rob.	Proc. Biol. Soc. Washington	101(4)	957		1988	Vernonia propinqua Hieron.	Chrysolaena propinqua (Hieron.) H. Rob. var. canescens (Chodat) Dematt., Vernonia lepidifera Chodat var. canescens Chodat, Vernonia propinqua (Hieron.) H. Rob. var. canescens (Chodat) Dematt., Vernonia lepidifera Chodat	R		R						R					Native
Vernonioideae	Vernonieae	Chrysolaena sceptrum (Chodat) Dematt.	Chrysolaena	sceptrum	(Chodat) Dematt.	Bol. Soc. Argent. Bot.	44(1-2)	140		2009	Vernonia sceptrum Chodat, Vernonia cognata var. sceptrum (Chodat) Cabrera				R						R					Native
Vernonioideae	Vernonieae	Chrysolaena simplex (Less.) Dematt.	Chrysolaena	simplex	(Less.) Dematt.	Ann. Bot. Fenn.	44(1)	62		2007				R	R											Native
Vernonioideae	Vernonieae	Chrysolaena verbascifolia (Less.) H. Rob.	Chrysolaena	verbascifolia	(Less.) H. Rob.	Proc. Biol. Soc. Washington	101(4)	957		1988	Vernonia verbascifolia Less., Cacalia verbascifolia (Less.) Kuntze	Vernonia verbascifolia Less. var. laxa Arechav., Vernonia verbascifolia Less. var. robustior Arechav.	R		R						R			R		Native
Barnadesioideae	Barnadesieae	Chuquiraga acanthophylla Wedd.	Chuquiraga	acanthophylla	Wedd.	Chlor. Andina	1(1)	5		1855		Chuquiraga punensis Gaspar	R	R												Native
Barnadesioideae	Barnadesieae	Chuquiraga arcuata Harling	Chuquiraga	arcuata	Harling	Fl. Ecuador	42(190:10)	26		1991								R								Endemic	Endangered
Barnadesioideae	Barnadesieae	Chuquiraga atacamensis Kuntze	Chuquiraga	atacamensis	Kuntze	Revis. Gen. Pl.	3(3)	141		1898		Chuquiraga glabra Phil.	R	R		R										Native
Barnadesioideae	Barnadesieae	Chuquiraga aurea Skottsb.	Chuquiraga	aurea	Skottsb.	Kongl. Svenska Vetensk. Acad. Handl., n.f.,	56(5)	325		1916		Chuquiraga erinacea D. Don fo. pulvinata Cabrera	R													Endemic
Barnadesioideae	Barnadesieae	Chuquiraga avellanedae Lorentz	Chuquiraga	avellanedae	Lorentz	Exped. Rio Negro, Bot.	2	245		1881		Chuquiraga dusenii O. Hoffm., Chuquiraga argentea (Speg.) Speg. var. dusenii (O. Hoffm.) Speg., Chuquiraga avellanedae Lorentz var. dusenii (O. Hoffm.) Hosseus, Chuquiraga kingii Ball	R													Endemic
Barnadesioideae	Barnadesieae	Chuquiraga calchaquina Cabrera	Chuquiraga	calchaquina	Cabrera	Lilloa	6(1-2)	247		1941		*No	R													Endemic
Barnadesioideae	Barnadesieae	Chuquiraga echegarayi Hieron.	Chuquiraga	echegarayi	Hieron.	Bol. Acad. Nac. Ci.	4(1)	47		1881		*No	R													Endemic
Barnadesioideae	Barnadesieae	Chuquiraga erinacea D. Don	Chuquiraga	erinacea	D. Don	Philos. Mag. Ann. Chem.	11	392		1832		Chuquiraga junipera Decne., Chuquiraga ungui-cati Ces., Chuquiraga erinacea D. Don var. unguis-cati (Ces.) Hauman, Chuquiraga erinacea D. Don var. mollior Lorentz, Chuquiraga junipera Phil., Chuquiraga erinacea D. Don subsp. hystrix (D. Don) C. Ezcurra, Chuquiraga hystrix D. Don	R													Endemic
Barnadesioideae	Barnadesieae	Chuquiraga johnstonii Tovar	Chuquiraga	johnstonii	Tovar	Publ. Mus. Hist. Nat. Javier Prado, Ser. B, Bot.	5	8		1952												R				Endemic
Barnadesioideae	Barnadesieae	Chuquiraga jussieui J.F. Gmel.	Chuquiraga	jussieui	J.F. Gmel.	Syst. Nat., ed. 13[bis].	2(2)	1205		1791				R			R	R				R				Native
Barnadesioideae	Barnadesieae	Chuquiraga kuschelii Acevedo	Chuquiraga	kuschelii	Acevedo	Bol. Mus. Nac. Hist. Nat. Santiago de Chile	24	86		1849						R										Endemic
Barnadesioideae	Barnadesieae	Chuquiraga longiflora (Griseb.) Hieron.	Chuquiraga	longiflora	(Griseb.) Hieron.	Bol. Acad. Nac. Ci.	4(3-4)	359		1882	Chuquiraga chrysantha var. longiflora Griseb.	Chuquiraga oppositifolia D. Don var. macrocephala Wedd.	R	R												Native
Barnadesioideae	Barnadesieae	Chuquiraga morenonis (Kuntze) C. Ezcurra	Chuquiraga	morenonis	(Kuntze) C. Ezcurra	Darwiniana	26(1-4)	256		1985	Chuquiraga spinosa var. morenonis Kuntze,	Doniophyton argenteum Speg., Chuquiraga argentea (Speg.) Speg.	R													Endemic
Barnadesioideae	Barnadesieae	Chuquiraga oblongifolia Sagást. & Sánchez Vega	Chuquiraga	oblongifolia	Sagást. & Sánchez Vega	Arnaldoa	1(2)	1		1991												R				Endemic
Barnadesioideae	Barnadesieae	Chuquiraga oppositifolia D. Don	Chuquiraga	oppositifolia	D. Don	Philos. Mag. Ann. Chem.	11	392		1832		Chuquiraga alpina Poepp. ex Less., Barnadesia flavescens Meyen, Chuquiraga oppositifolia D. Don var. macracantha J. Rémy, Chuquiraga chrysantha Field & Gardner, Chuquiraga oppositifolia D. Don var. angustifolia Ces.	R			R										Native
Barnadesioideae	Barnadesieae	Chuquiraga parviflora (Griseb.) Hieron.	Chuquiraga	parviflora	(Griseb.) Hieron.	Bot. Jahrb. Syst.	49(2)	231		1913	Chuquiraga spinosa var. parviflora Griseb.	Chuquiraga oppositifolia D. Don var. microcephala Wedd.	R	R												Native
Barnadesioideae	Barnadesieae	Chuquiraga raimondiana A. Granda	Chuquiraga	raimondiana	A. Granda	Kurtziana	25	151		1997												R				Endemic
Barnadesioideae	Barnadesieae	Chuquiraga rosulata Gaspar	Chuquiraga	rosulata	Gaspar	Revista Argent. Agron	12(3)	170		1945		*No	R													Endemic
Barnadesioideae	Barnadesieae	Chuquiraga rotundifolia Wedd.	Chuquiraga	rotundifolia	Wedd.	Chlor. Andina	1(1)	4		1855												R				Endemic	Least Concern
Barnadesioideae	Barnadesieae	Chuquiraga ruscifolia D. Don	Chuquiraga	ruscifolia	D. Don	Philos. Mag. Ann. Chem.	11	392		1832		*No	R													Endemic
Barnadesioideae	Barnadesieae	Chuquiraga spinosa Less.	Chuquiraga	spinosa	Less.	Linnaea	5(2)	259		1830		Chuquiraga spinosa Less. subsp. australis C. Ezcurra	R	R		R						R				Native
Barnadesioideae	Barnadesieae	Chuquiraga straminea Sandwith	Chuquiraga	straminea	Sandwith	Bull. Misc. Inform. Kew	1927(4)	182		1927		*No	R													Endemic
Barnadesioideae	Barnadesieae	Chuquiraga ulicina (Hook. & Arn.) Hook. & Arn.	Chuquiraga	ulicina	(Hook. & Arn.) Hook. & Arn.	Companion Bot. Mag.	1(4)	110		1835						R										Endemic
Barnadesioideae	Barnadesieae	Chuquiraga weberbaueri Tovar	Chuquiraga	weberbaueri	Tovar	Publ. Mus. Hist. Nat. Javier Prado, Ser. B, Bot.	5	11		1952												R				Endemic	Least Concern
Asteroideae	Heliantheae	Clibadium acuminatum Benth.	Clibadium	acuminatum	Benth.	Bot. Voy. Sulphur [Bentham]		114		1844[1845]							R								R	Native
Asteroideae	Heliantheae	Clibadium alatum H. Rob.	Clibadium	alatum	H. Rob.	Phytologia	73(2)	151		1992								R								Endemic	Vulnerable
Asteroideae	Heliantheae	Clibadium armanii (Balb.) Sch. Bip. ex O.E. Schulz	Clibadium	armanii	(Balb.) Sch. Bip. ex O.E. Schulz	Bot. Jahrb. Syst.	46(5)	616		1912				R	R				R	R	R		R		R	Native
Asteroideae	Heliantheae	Clibadium arriagadae Pruski	Clibadium	arriagadae	Pruski	Sida	21(4)	2029	f. 3	2005								R								Endemic
Asteroideae	Heliantheae	Clibadium asperum (Aubl.) DC.	Clibadium	asperum	(Aubl.) DC.	Prodr. [A. P. de Candolle]	5	506		1836												R				Endemic
Asteroideae	Heliantheae	Clibadium cordatum Cuatrec.	Clibadium	cordatum	Cuatrec.	Revista Acad. Colomb. Ci. Exact.	9(35)	237		1954							R									Endemic	Least Concern
Asteroideae	Heliantheae	Clibadium divaricatum S.F. Blake	Clibadium	divaricatum	S.F. Blake	Contr. Gray Herb.	52	7		1917				R								R				Native
Asteroideae	Heliantheae	Clibadium eggersii Hieron.	Clibadium	eggersii	Hieron.	Bot. Jahrb. Syst.	28(5)	598		1901							R	R								Native
Asteroideae	Heliantheae	Clibadium frontinoense S. Díaz & Arriagada	Clibadium	frontinoense	S. Díaz & Arriagada	Revista Acad. Colomb. Ci. Exact.	18(70)	301		1992							R									Endemic
Asteroideae	Heliantheae	Clibadium glabrescens S.F. Blake	Clibadium	glabrescens	S.F. Blake	J. Wash. Acad. Sci.	27(9)	381		1937							R	R							R	Native
Asteroideae	Heliantheae	Clibadium grandifolium S.F. Blake	Clibadium	grandifolium	S.F. Blake	Contr. U.S. Natl. Herb.	22(8)	599		1924							R	R								Native	Least Concern
Asteroideae	Heliantheae	Clibadium harlingii H. Rob.	Clibadium	harlingii	H. Rob.	Phytologia	44(4)	282		1979								R								Endemic	Vulnerable
Asteroideae	Heliantheae	Clibadium laxum S.F. Blake	Clibadium	laxum	S.F. Blake	J. Wash. Acad. Sci.	16(15)	418		1926							R	R								Native
Asteroideae	Heliantheae	Clibadium leptophyllum Cuatrec.	Clibadium	leptophyllum	Cuatrec.	Revista Acad. Colomb. Ci. Exact.	9(35)	237		1954							R									Endemic
Asteroideae	Heliantheae	Clibadium manabiense H. Rob.	Clibadium	manabiense	H. Rob.	Phytologia	44(4)	280		1979							R	R								Native	Vulnerable
Asteroideae	Heliantheae	Clibadium mexiae S.F. Blake	Clibadium	mexiae	S.F. Blake	J. Wash. Acad. Sci.	28(11)	489		1938								R								Endemic	Near Threatened
Asteroideae	Heliantheae	Clibadium micranthum O.E. Schulz	Clibadium	micranthum	O.E. Schulz	Bot. Jahrb. Syst.	46(5)	625		1912				R												Endemic
Asteroideae	Heliantheae	Clibadium microcephalum S.F. Blake	Clibadium	microcephalum	S.F. Blake	J. Wash. Acad. Sci.	16(15)	419		1926							R	R								Native
Asteroideae	Heliantheae	Clibadium napoense H. Rob.	Clibadium	napoense	H. Rob.	Phytologia	73(2)	152		1992								R								Endemic	Vulnerable
Asteroideae	Heliantheae	Clibadium pastazense Domke	Clibadium	pastazense	Domke	Biblioth. Bot.	116	163		1937								R								Endemic	Vulnerable
Asteroideae	Heliantheae	Clibadium pentaneuron S.F. Blake	Clibadium	pentaneuron	S.F. Blake	Contr. U.S. Natl. Herb.	22(8)	598		1924							R									Endemic
Asteroideae	Heliantheae	Clibadium peruvianum Poepp. ex DC.	Clibadium	peruvianum	Poepp. ex DC.	Prodr. [A. P. de Candolle]	5	505		1836		Clibadium remotiflorum O.E. Schulz; Clibadium heterotrichum S.F. Blake; Clibadium psilogynum S.F. Blake; Clibadium vargasianum H. Robinson	R	R								R				Native
Asteroideae	Heliantheae	Clibadium psilogynum S.F. Blake	Clibadium	psilogynum	S.F. Blake	J. Wash. Acad. Sci.	21(14)	329		1931												R				Endemic
Asteroideae	Heliantheae	Clibadium remotiflorum O.E. Schulz	Clibadium	remotiflorum	O.E. Schulz	Bot. Jahrb. Syst.	46(5)	621		1912				R								R				Native
Asteroideae	Heliantheae	Clibadium rhytidophyllum Diels	Clibadium	rhytidophyllum	Diels	Notizbl. Bot. Gart. Berlin-Dahlem	14(124)	341		1939								R								Endemic	Endangered
Asteroideae	Heliantheae	Clibadium sodiroi Hieron.	Clibadium	sodiroi	Hieron.	Bot. Jahrb. Syst.	29(1)	32		1900							R	R								Native
Asteroideae	Heliantheae	Clibadium sprucei S.F. Blake	Clibadium	sprucei	S.F. Blake	Contr. Gray Herb.	52	5		1917								R								Endemic	Vulnerable
Asteroideae	Heliantheae	Clibadium strigillosum S.F. Blake	Clibadium	strigillosum	S.F. Blake	Contr. Gray Herb.	52	4		1917												R				Endemic
Asteroideae	Heliantheae	Clibadium subsessilifolium Hieron.	Clibadium	subsessilifolium	Hieron.	Bot. Jahrb. Syst.	29(1)	32		1900								R								Endemic	Data Deficient
Asteroideae	Heliantheae	Clibadium surinamense L.	Clibadium	surinamense	L.	Mant. Pl. Altera	2	294		1771				R	R		R	R	R	R		R	R		R	Native	Least Concern
Asteroideae	Heliantheae	Clibadium sylvestre (Aubl.) Baill.	Clibadium	sylvestre	(Aubl.) Baill.	Hist. Pl. (Baillon)	8	307		1886[1882]	Baillieria sylvestris Aubl., Trixis aspera var. sylvestris (Aubl.) Pers.			R	R		R	R	R	R		R	R		R	Native	Least Concern
Asteroideae	Heliantheae	Clibadium terebinthinaceum (Sw.) DC.	Clibadium	terebinthinaceum	(Sw.) DC.	Prodr. [A. P. de Candolle]	5	506		1836							R									Endemic
Asteroideae	Heliantheae	Clibadium trianae (Hieron.) S.F. Blake	Clibadium	trianae	(Hieron.) S.F. Blake	Contr. Gray Herb.	52	6		1917	Desmanthodium trianae Hieron.						R	R							R	Native
Asteroideae	Heliantheae	Clibadium vargasianum H. Rob.	Clibadium	vargasianum	H. Rob.	Wrightia	6(3)	46		1979												R				Endemic
Asteroideae	Heliantheae	Clibadium websteri H. Rob.	Clibadium	websteri	H. Rob.	Phytologia	82(1)	60		1997								R								Endemic	Endangered
Asteroideae	Heliantheae	Clibadium zakii H. Rob.	Clibadium	zakii	H. Rob.	Fl. Ecuador	77(1)	112		2006								R								Endemic	Vulnerable
Asteroideae	Heliantheae	Clibadium zarucchii H. Rob.	Clibadium	zarucchii	H. Rob.	Phytologia	65(1)	51		1988							R									Endemic
Gochnatioideae	Gochnatieae	Cnicothamnus azafran (Cabrera) Cabrera	Cnicothamnus	azafran	(Cabrera) Cabrera	Notas Mus. La Plata, Bot.	9(46)	256		1944	Cnicothamnus lorentzii Griseb. var. azafran Cabrera		R	R							R					Native
Gochnatioideae	Gochnatieae	Cnicothamnus lorentzii Griseb.	Cnicothamnus	lorentzii	Griseb.	Abh. Königl. Ges. Wiss. Göttingen	19	197		1874		*No	R	R												Native	Least Concern
Asteroideae	Millerieae	Coespeletia alba (A.C. Sm.) Cuatrec.	Coespeletia	alba	(A.C. Sm.) Cuatrec.	Phytologia	35(1)	57		1976															R	Endemic
Asteroideae	Millerieae	Coespeletia elongata (A.C. Sm.) Cuatrec.	Coespeletia	elongata	(A.C. Sm.) Cuatrec.	Phytologia	35(1)	57		1976															R	Endemic
Asteroideae	Millerieae	Coespeletia laxiflora (S. Díaz & Rodr.-Cabeza) S. Díaz & Rodr.-Cabeza	Coespeletia	laxiflora	(S. Díaz & Rodr.-Cabeza) S. Díaz & Rodr.-Cabeza	Revista Acad. Colomb. Ci. Exact.	35(137)	422		2011							R									Endemic	Critically Endangered
Asteroideae	Millerieae	Coespeletia marcana (Cuatrec.) Cuatrec.	Coespeletia	marcana	(Cuatrec.) Cuatrec.	Phytologia	35(1)	57		1976															R	Endemic
Asteroideae	Millerieae	Coespeletia moritziana (Sch. Bip. ex Wedd.) Cuatrec.	Coespeletia	moritziana	(Sch. Bip. ex Wedd.) Cuatrec.	Phytologia	35(1)	57		1976															R	Endemic
Asteroideae	Millerieae	Coespeletia palustris Diazgr. & Morillo	Coespeletia	palustris	Diazgr. & Morillo	PhytoKeys	28	11		2013	Espeletia palustris														R	Endemic
Asteroideae	Millerieae	Coespeletia spicata (Sch. Bip. ex Wedd.) Cuatrec.	Coespeletia	spicata	(Sch. Bip. ex Wedd.) Cuatrec.	Phytologia	35(1)	57		1976															R	Endemic
Asteroideae	Millerieae	Coespeletia thyrsiformis (A.C. Sm.) Cuatrec.	Coespeletia	thyrsiformis	(A.C. Sm.) Cuatrec.	Phytologia	35(1)	57		1976															R	Endemic
Asteroideae	Millerieae	Coespeletia timotensis (Cuatrec.) Cuatrec.	Coespeletia	timotensis	(Cuatrec.) Cuatrec.	Phytologia	35(1)	57		1976															R	Endemic
Vernonioideae	Vernonieae	Cololobus argenteus M. Monge & Semir	Cololobus	argenteus	M. Monge & Semir	Rodriguésia	69(2)	603		2018					R											Endemic
Vernonioideae	Vernonieae	Cololobus hatschbachii H. Rob.	Cololobus	hatschbachii	H. Rob.	Proc. Biol. Soc. Washington	107(3)	560		1994					R											Endemic
Vernonioideae	Vernonieae	Cololobus longiangustatus (G.M. Barroso) H. Rob.	Cololobus	longiangustatus	(G.M. Barroso) H. Rob.	Proc. Biol. Soc. Washington	107(3)	560		1994					R											Endemic
Vernonioideae	Vernonieae	Cololobus rupestris (Gardner) H. Rob.	Cololobus	rupestris	(Gardner) H. Rob.	Proc. Biol. Soc. Washington	107(3)	560		1994					R											Endemic
Vernonioideae	Vernonieae	Cololobus ruschianus M. Monge, Fraga & A.P. Fontana	Cololobus	ruschianus	M. Monge, Fraga & A.P. Fontana	Syst. Bot.	46(4)	1115		2021					R											Endemic
Asteroideae	Eupatorieae	Condylidium cuatrecasasii R.M. King & H. Rob.	Condylidium	cuatrecasasii	R.M. King & H. Rob.	Phytologia	24(5)	381		1972							R									Endemic
Asteroideae	Eupatorieae	Condylidium iresinoides (Kunth) R.M. King & H. Rob.	Condylidium	iresinoides	(Kunth) R.M. King & H. Rob.	Phytologia	24(5)	381		1972	Eupatorium iresinoides Kunth			R			R	R		R		R			R	Native
Asteroideae	Eupatorieae	Condylopodium cuatrecasasii R.M. King & H. Rob.	Condylopodium	cuatrecasasii	R.M. King & H. Rob.	Phytologia	24(5)	398		1972							R									Endemic
Asteroideae	Eupatorieae	Condylopodium fuliginosum (Kunth) R.M. King & H. Rob.	Condylopodium	fuliginosum	(Kunth) R.M. King & H. Rob.	Phytologia	24(5)	399		1972	Eupatorium fuliginosum Kunth						R	R								Native
Asteroideae	Eupatorieae	Condylopodium gachalanum S. Díaz & G.P. Méndez	Condylopodium	gachalanum	S. Díaz & G.P. Méndez	Revista Acad. Colomb. Ci. Exact.	25(94)	18		2001							R									Endemic
Asteroideae	Eupatorieae	Condylopodium hyalinifolium S. Díaz & G.P. Méndez	Condylopodium	hyalinifolium	S. Díaz & G.P. Méndez	Revista Acad. Colomb. Ci. Exact.	24(90)	46		2000							R									Endemic
Asteroideae	Eupatorieae	Condylopodium killipii R.M. King & H. Rob.	Condylopodium	killipii	R.M. King & H. Rob.	Phytologia	24(5)	399		1972							R									Endemic
Asteroideae	Eupatorieae	Condylopodium pennellii R.M. King & H. Rob.	Condylopodium	pennellii	R.M. King & H. Rob.	Phytologia	24(5)	399		1972							R									Endemic
Asteroideae	Eupatorieae	Conocliniopsis prasiifolia (DC.) R.M. King & H. Rob.	Conocliniopsis	prasiifolia	(DC.) R.M. King & H. Rob.	Phytologia	23(3)	308		1972					R		R								R	Native
Asteroideae	Astereae	Conyza altoandina Cabrera	Conyza	altoandina	Cabrera	Bol. Soc. Argent. Bot.	14(4)	347		1972				R												Endemic
Asteroideae	Astereae	Conyza andina J. Rémy	Conyza	andina	J. Rémy	Fl. Chil.	4(1)	72		1849						R										Endemic
Asteroideae	Astereae	Conyza arabidifolia J. Rémy	Conyza	arabidifolia	J. Rémy	Fl. Chil.	4(1)	76		1849						R										Endemic
Asteroideae	Astereae	Conyza artemisioides Meyen & Walp.	Conyza	artemisioides	Meyen & Walp.	Nov. Actorum Acad. Caes. Leop.-Carol. Nat. Cur.	19(Suppl. 1)	262		1843				R								R				Native
Asteroideae	Astereae	Conyza blakei (Cabrera) Cabrera	Conyza	blakei	(Cabrera) Cabrera	Man. Fl. Al. Buenos Aires		481		1953	Erigeron blakei Cabrera	Erigeron montevidensis Baker	R		R						R			R		Native
Asteroideae	Astereae	Conyza boelckei Cabrera	Conyza	boelckei	Cabrera	Fl. Patagónica	8(7)	47		1971			R													Endemic
Asteroideae	Astereae	Conyza burkartii Zardini	Conyza	burkartii	Zardini	Bol. Soc. Argent. Bot.	17(1-2)	33		1976			R													Endemic
Asteroideae	Astereae	Conyza bustillosiana J. Rémy	Conyza	bustillosiana	J. Rémy	Fl. Chil.	4(1)	72		1849						R										Endemic
Asteroideae	Astereae	Conyza cardaminifolia Kunth	Conyza	cardaminifolia	Kunth	Nov. Gen. Sp. (folio ed.)	4(14)	56		1820[1818]	Erigeron cardaminiifolius (Kunth) Wedd.	Erigeron pinnatus Turcz., Erigeron pinnatus var. monocephalus Wedd.					R	R				R				Native
Asteroideae	Astereae	Conyza catharinensis Cabrera	Conyza	catharinensis	Cabrera	Bol. Soc. Argent. Bot.	7(3-4)	191		1959			R		R											Native
Asteroideae	Astereae	Conyza chionea S. Díaz & A. Correa	Conyza	chionea	S. Díaz & A. Correa	Revista Acad. Colomb. Ci. Exact.	25(95)	180	f. 1-2	2001							R									Endemic
Asteroideae	Astereae	Conyza copiapina Phil.	Conyza	copiapina	Phil.	Anales Univ. Chile	87	686		1894						R										Endemic
Asteroideae	Astereae	Conyza cordata Kuntze	Conyza	cordata	Kuntze	Revis. Gen. Pl.	3(3)	142		1898		Conyza chilensis Spreng. var. auriculata Griseb	R													Endemic
Asteroideae	Astereae	Conyza coronopifolia Kunth	Conyza	coronopifolia	Kunth	Nov. Gen. Sp. (folio ed.)	4(14)	55		1820[1818]	Erigeron variifolius S.F. Blake	Conyza obtusa Kunth	R	R			R	R								Native
Asteroideae	Astereae	Conyza depilis Phil.	Conyza	depilis	Phil.	Anales Univ. Chile	87	691		1894						R										Endemic
Asteroideae	Astereae	Conyza deserticola Phil.	Conyza	deserticola	Phil.	Anales Mus. Nac., Santiago de Chile, secc. 2, bot.	8	38		1891		Erigeron cinerascens Sch. Bip. ex Wedd.	R	R		R						R				Native
Asteroideae	Astereae	Conyza foliosa Phil.	Conyza	foliosa	Phil.	Anales Univ. Chile	87	692		1894						R										Endemic
Asteroideae	Astereae	Conyza gayana Phil.	Conyza	gayana	Phil.	Linnaea	28(6)	737		1858						R										Endemic
Asteroideae	Astereae	Conyza glabrata Phil.	Conyza	glabrata	Phil.	Anales Univ. Chile	87	690		1894						R										Endemic
Asteroideae	Astereae	Conyza glandulitecta Cabrera	Conyza	glandulitecta	Cabrera	Bol. Soc. Argent. Bot.	14(4)	349		1972			R		R						R					Native
Asteroideae	Astereae	Conyza laevigata (Rich.) Pruski	Conyza	laevigata	(Rich.) Pruski	Brittonia	50(4)	475		1998	Erigeron laevigatus Rich.	Erigeron spathulatus Vahl	R	R	R		R		R						R	Native
Asteroideae	Astereae	Conyza larrainiana J. Rémy	Conyza	larrainiana	J. Rémy	Fl. Chil.	4(1)	71		1849		Conyza pratensis Phil	R			R										Native
Asteroideae	Astereae	Conyza lateralis Phil.	Conyza	lateralis	Phil.	Anales Univ. Chile	87	679		1894						R										Endemic
Asteroideae	Astereae	Conyza lechleri (Sch. Bip.) Cabrera	Conyza	lechleri	(Sch. Bip.) Cabrera	Fl. Patagónica	8(7)	46		1971			R			R										Native
Asteroideae	Astereae	Conyza lignescens Rusby	Conyza	lignescens	Rusby	Bull. New York Bot. Gard.	4(14)	385		1907				R												Endemic
Asteroideae	Astereae	Conyza lorentzii Griseb.	Conyza	lorentzii	Griseb.	Abh. Königl. Ges. Wiss. Göttingen	24	176		1879			R		R									R		Native
Asteroideae	Astereae	Conyza macrophylla Spreng.	Conyza	macrophylla	Spreng.	Syst. Veg. [Sprengel]	3	513		1826					R									R		Native
Asteroideae	Astereae	Conyza magnimontana Cabrera	Conyza	magnimontana	Cabrera	Fl. Patagónica	8(7)	42		1971			R													Endemic
Asteroideae	Astereae	Conyza monorchis (Griseb.) Cabrera	Conyza	monorchis	(Griseb.) Cabrera	Man. Fl. Al. Buenos Aires		481		1953	Erigeron monorchis Griseb.		R		R									R		Native
Asteroideae	Astereae	Conyza neolaxiflora A.M. Teles & Stehmann	Conyza	neolaxiflora	A.M. Teles & Stehmann	Rodriguésia	59(2)	400		2008					R											Endemic
Asteroideae	Astereae	Conyza oligantha Cabrera	Conyza	oligantha	Cabrera	Fl. Patagónica	8(7)	47		1971			R													Endemic
Asteroideae	Astereae	Conyza pampeana (Parodi) Cabrera	Conyza	pampeana	(Parodi) Cabrera	Man. Fl. Al. Buenos Aires		481		1953	Erigeron pampeanus Parodi		R		R									R		Native
Asteroideae	Astereae	Conyza pencana Phil.	Conyza	pencana	Phil.	Anales Univ. Chile	87	695		1894						R										Endemic
Asteroideae	Astereae	Conyza perijaensis S. Díaz & A. Correa	Conyza	perijaensis	S. Díaz & A. Correa	Revista Acad. Colomb. Ci. Exact.	25(95)	181		2001							R									Endemic
Asteroideae	Astereae	Conyza popayanensis (Hieron.) Pruski	Conyza	popayanensis	(Hieron.) Pruski	Sida	21(4)	2032		2005	Erigeron popayanensis Hieron.						R	R				R				Native
Asteroideae	Astereae	Conyza reitziana Cabrera	Conyza	reitziana	Cabrera	Bol. Soc. Argent. Bot.	7(3-4)	193	f. 4	1959					R											Endemic
Asteroideae	Astereae	Conyza retirensis Cabrera	Conyza	retirensis	Cabrera	Bol. Soc. Argent. Bot.	7(3-4)	196		1959					R											Endemic
Asteroideae	Astereae	Conyza saltensis Cabrera	Conyza	saltensis	Cabrera	Bol. Soc. Argent. Bot.	14(4)	351		1972			R													Endemic
Asteroideae	Astereae	Conyza serrana Cabrera	Conyza	serrana	Cabrera	Fl. Prov. Buenos Aires	6	87		1963		Erigeron platensis Speg	R		R									R		Native
Asteroideae	Astereae	Conyza spiciformis (Griseb.) Zardini	Conyza	spiciformis	(Griseb.) Zardini	Bol. Soc. Argent. Bot.	17(1-2)	45		1976			R	R												Native
Asteroideae	Astereae	Conyza spiculosa (Hook. & Arn.) Zardini	Conyza	spiculosa	(Hook. & Arn.) Zardini	Bol. Soc. Argent. Bot.	17(1-2)	39		1976				R		R										Native
Asteroideae	Astereae	Conyza stenophylla Phil.	Conyza	stenophylla	Phil.	Anales Univ. Chile	87	687		1894						R										Endemic
Asteroideae	Astereae	Conyza suffruticosa Phil.	Conyza	suffruticosa	Phil.	Linnaea	28(6)	735		1858				R		R										Native
Asteroideae	Astereae	Conyza sumatrensis (Retz.) E. Walker	Conyza	sumatrensis	(Retz.) E. Walker	J. Jap. Bot.	46(3)	72		1971	Erigeron sumatrensis Retz.		R	R	R	R	R				R	R		R	R	Native
Asteroideae	Astereae	Conyza tenera Phil.	Conyza	tenera	Phil.	Anales Univ. Chile	87	684		1894						R										Endemic
Asteroideae	Astereae	Conyza thermarum Phil.	Conyza	thermarum	Phil.	Anales Univ. Chile	21	381		1862						R										Endemic
Asteroideae	Astereae	Conyza trihecatactis (S.F. Blake) Cuatrec.	Conyza	trihecatactis	(S.F. Blake) Cuatrec.	Phytologia	9(1)	5		1963	Erigeron trihecatactis S.F. Blake						R	R								Native
Asteroideae	Astereae	Conyza tunariensis (Kuntze) Zardini	Conyza	tunariensis	(Kuntze) Zardini	Bol. Soc. Argent. Bot.	17(1-2)	45		1976	Erigeron tunariensis Kuntze		R	R								R				Native
Asteroideae	Astereae	Conyza uliginosa Pers.	Conyza	uliginosa	Pers.	Syn. Pl. [Persoon]	2(2)	427		1807	Pluchea bifrons var. uliginosa (Pers.) Torr. & A. Gray	Conyza amplexicaulis Michx.					R	R							R	Native
Asteroideae	Astereae	Conyza valdiviana Phil.	Conyza	valdiviana	Phil.	Anales Univ. Chile	87	697		1894						R										Endemic
Asteroideae	Coreopsideae	Coreopsis breviligulata Sagást.	Coreopsis	breviligulata	Sagást.	Darwiniana	23(1)	223		1981												R				Endemic
Asteroideae	Coreopsideae	Coreopsis cajamarcana Sagást. & Sánchez Vega	Coreopsis	cajamarcana	Sagást. & Sánchez Vega	Bol. Soc. Bot. La Libertad	15(1)	23		1989												R				Endemic
Asteroideae	Coreopsideae	Coreopsis canescentifolia Sagást.	Coreopsis	canescentifolia	Sagást.	Bol. Soc. Bot. La Libertad	14(1)	49		1988												R				Endemic
Asteroideae	Coreopsideae	Coreopsis capillacea Kunth	Coreopsis	capillacea	Kunth	Nov. Gen. Sp. (folio ed.)	4(17)	180		1820[1818]							R	R				R				Native
Asteroideae	Coreopsideae	Coreopsis celendinensis Sagást.	Coreopsis	celendinensis	Sagást.	Bol. Soc. Argent. Bot.	13(4)	337		1971												R				Endemic
Asteroideae	Coreopsideae	Coreopsis connata Cabrera	Coreopsis	connata	Cabrera	Bol. Soc. Argent. Bot.	10(1)	27		1962												R				Endemic
Asteroideae	Coreopsideae	Coreopsis dentifolia Sánchez Vega, Sagást. & D.J. Crawford	Coreopsis	dentifolia	Sánchez Vega, Sagást. & D.J. Crawford	Arnaldoa	2(2)	37		1994												R				Endemic
Asteroideae	Coreopsideae	Coreopsis dilloniana Sánchez Vega, Sagást. & D.J. Crawford	Coreopsis	dilloniana	Sánchez Vega, Sagást. & D.J. Crawford	Arnaldoa	2(2)	40		1994												R				Endemic
Asteroideae	Coreopsideae	Coreopsis fasciculata Wedd.	Coreopsis	fasciculata	Wedd.	Chlor. Andina	1(3)	71		1856				R				R				R				Native
Asteroideae	Coreopsideae	Coreopsis ferreyrae Sagást. & Sánchez Vega	Coreopsis	ferreyrae	Sagást. & Sánchez Vega	Bol. Soc. Bot. La Libertad	15(1)	26		1989												R				Endemic
Asteroideae	Coreopsideae	Coreopsis foliosa A. Gray	Coreopsis	foliosa	A. Gray	Proc. Amer. Acad. Arts	5	125		1861												R				Endemic
Asteroideae	Coreopsideae	Coreopsis glaucodes S.F. Blake & Sherff	Coreopsis	glaucodes	S.F. Blake & Sherff	Bot. Gaz.	80(4)	369		1925												R				Endemic
Asteroideae	Coreopsideae	Coreopsis helleborifolia Sánchez Vega, Sagást. & D.J. Crawford	Coreopsis	helleborifolia	Sánchez Vega, Sagást. & D.J. Crawford	Arnaldoa	2(2)	42		1994												R				Endemic
Asteroideae	Coreopsideae	Coreopsis holodasya S.F. Blake	Coreopsis	holodasya	S.F. Blake	Kew Bull.	15(3)	373		1962												R				Endemic
Asteroideae	Coreopsideae	Coreopsis imbricata Sherff	Coreopsis	imbricata	Sherff	Bot. Gaz.	89(4)	370		1930												R				Endemic
Asteroideae	Coreopsideae	Coreopsis integra S.F. Blake	Coreopsis	integra	S.F. Blake	J. Wash. Acad. Sci.	27(9)	385		1937												R				Endemic
Asteroideae	Coreopsideae	Coreopsis killipii Sherff	Coreopsis	killipii	Sherff	Bot. Gaz.	94(3)	594		1933												R				Endemic
Asteroideae	Coreopsideae	Coreopsis lanceolata L.	Coreopsis	lanceolata	L.	Sp. Pl.	2	908		1753			R		R									R		Native
Asteroideae	Coreopsideae	Coreopsis longula S.F. Blake	Coreopsis	longula	S.F. Blake	Contr. U.S. Natl. Herb.	22(8)	642		1924												R				Endemic
Asteroideae	Coreopsideae	Coreopsis lopez-mirandae Sagást.	Coreopsis	lopez-mirandae	Sagást.	Bol. Soc. Argent. Bot.	11(4)	248		1969												R				Endemic
Asteroideae	Coreopsideae	Coreopsis macbridei Sherff	Coreopsis	macbridei	Sherff	Bot. Gaz.	89(4)	369		1930												R				Endemic
Asteroideae	Coreopsideae	Coreopsis microlepis S.F. Blake & Sherff	Coreopsis	microlepis	S.F. Blake & Sherff	Bot. Gaz.	80(4)	370		1925												R				Endemic
Asteroideae	Coreopsideae	Coreopsis mollicula Sagást. & Sánchez Vega	Coreopsis	mollicula	Sagást. & Sánchez Vega	Sciéndo	10(1)	87		2007												R				Endemic
Asteroideae	Coreopsideae	Coreopsis multifida DC.	Coreopsis	multifida	DC.	Prodr. [A. P. de Candolle]	5	573		1836												R				Endemic
Asteroideae	Coreopsideae	Coreopsis nodosa Sherff	Coreopsis	nodosa	Sherff	Bot. Gaz.	94(3)	595		1933												R				Endemic
Asteroideae	Coreopsideae	Coreopsis notha S.F. Blake & Sherff	Coreopsis	notha	S.F. Blake & Sherff	Bot. Gaz.	80(4)	373		1925												R				Endemic
Asteroideae	Coreopsideae	Coreopsis oblanceolata S.F. Blake	Coreopsis	oblanceolata	S.F. Blake	Contr. U.S. Natl. Herb.	22(8)	642		1924												R				Endemic
Asteroideae	Coreopsideae	Coreopsis obovatifolia Sagást.	Coreopsis	obovatifolia	Sagást.	Hickenia	1(50)	263		1982												R				Endemic
Asteroideae	Coreopsideae	Coreopsis parviceps S.F. Blake & Sherff	Coreopsis	parviceps	S.F. Blake & Sherff	Bot. Gaz.	80(4)	368		1925												R				Endemic
Asteroideae	Coreopsideae	Coreopsis peruviana Sagást.	Coreopsis	peruviana	Sagást.	Bol. Soc. Bot. La Libertad	2(1-2)	73		1970												R				Endemic
Asteroideae	Coreopsideae	Coreopsis pervelutina Sagást.	Coreopsis	pervelutina	Sagást.	Hickenia	1(50)	265		1982												R				Endemic
Asteroideae	Coreopsideae	Coreopsis pickeringii A. Gray	Coreopsis	pickeringii	A. Gray	Proc. Amer. Acad. Arts	5	124		1861				R								R				Native
Asteroideae	Coreopsideae	Coreopsis piurana Sherff	Coreopsis	piurana	Sherff	Sida	1(6)	370		1964												R				Endemic
Asteroideae	Coreopsideae	Coreopsis poloe Sagást. & M. Zapata	Coreopsis	poloe	Sagást. & M. Zapata	Arnaldoa	10(2)	15		2003												R				Endemic
Asteroideae	Coreopsideae	Coreopsis polyactis S.F. Blake & Sherff	Coreopsis	polyactis	S.F. Blake & Sherff	Bot. Gaz.	80(4)	372		1925												R				Endemic
Asteroideae	Coreopsideae	Coreopsis senaria S.F. Blake & Sherff	Coreopsis	senaria	S.F. Blake & Sherff	Bot. Gaz.	80(4)	367		1925												R				Endemic
Asteroideae	Coreopsideae	Coreopsis sherffii S.F. Blake	Coreopsis	sherffii	S.F. Blake	J. Wash. Acad. Sci.	27(9)	386		1937												R				Endemic
Asteroideae	Coreopsideae	Coreopsis spectablilis A. Gray	Coreopsis	spectablilis	A. Gray	Proc. Amer. Acad. Arts	5	125		1861												R				Endemic
Asteroideae	Coreopsideae	Coreopsis suaveolens Sherff	Coreopsis	suaveolens	Sherff	Bot. Gaz.	89(4)	369		1930						R										Endemic
Asteroideae	Coreopsideae	Coreopsis tinctoria Nutt.	Coreopsis	tinctoria	Nutt.	J. Acad. Nat. Sci. Philadelphia	2(1)	114		1821		Calliopsis tinctoria (Nutt.) DC; Diplosastera tinctoria (Nutt.) Tausch	R		R											Native
Asteroideae	Coreopsideae	Coreopsis townsendii S.F. Blake	Coreopsis	townsendii	S.F. Blake	Contr. U.S. Natl. Herb.	22(8)	643		1924				R								R				Native
Asteroideae	Coreopsideae	Coreopsis triloba S.F. Blake	Coreopsis	triloba	S.F. Blake	Contr. U.S. Natl. Herb.	22(8)	643		1924												R				Endemic
Asteroideae	Coreopsideae	Coreopsis venusta Kunth	Coreopsis	venusta	Kunth	Nov. Gen. Sp. (folio ed.)	4(17)	180		1820[1818]								R				R				Native
Asteroideae	Coreopsideae	Coreopsis verticillata L.	Coreopsis	verticillata	L.	Sp. Pl.	2	907		1753					R											Endemic
Asteroideae	Coreopsideae	Coreopsis woytkowskii Sherff	Coreopsis	woytkowskii	Sherff	Publ. Field Mus. Nat. Hist., Bot. Ser.	11(6)	326		1936												R				Endemic
Asteroideae	Eupatorieae	Corethamnium chocoensis R.M. King & H. Rob.	Corethamnium	chocoensis	R.M. King & H. Rob.	Phytologia	39(1)	55		1978							R									Endemic
Asteroideae	Coreopsideae	Cosmos bipinnatus Cav.	Cosmos	bipinnatus	Cav.	Icon. [Cavanilles]	1(1)	10		1791		Cosmos bipinnatus Cav. var. exaristatus DC.	R		R		R					R				Native
Asteroideae	Coreopsideae	Cosmos calvus (Sch. Bip. ex Miq.) Sherff	Cosmos	calvus	(Sch. Bip. ex Miq.) Sherff	Publ. Field Mus. Nat. Hist., Bot. Ser.	8(6)	405		1932															R	Endemic
Asteroideae	Coreopsideae	Cosmos peucedanifolius Wedd.	Cosmos	peucedanifolius	Wedd.	Chlor. Andina	1(3)	70		1856		Bidens peucedanifolius (Wedd.) Kuntze	R	R								R				Native
Asteroideae	Coreopsideae	Cosmos subpubescens Wedd.	Cosmos	subpubescens	Wedd.	Chlor. Andina	1(3)	70		1856												R				Endemic
Asteroideae	Coreopsideae	Cosmos sulphureus Cav.	Cosmos	sulphureus	Cav.	Icon. [Cavanilles]	1(3)	56	pl. 79	1791	Bidens artemisiifolia var. sulphurea (Cav.) Kuntze, Bidens sulphurea (Cav.) Sch. Bip.	Cosmea sulphurea Willd; Bidens sulphurea (Cav.) Sch.Bip; Bidens artemisiifolia Poepp. & Endl. var. sulphurea (Cav.) Kuntze; Cosmos aurantiacus Klatt; Coreopsis artemisiifolia Sessé & Moq; Cosmos gracilis Sherff; Cosmos sulphureus Cav. var. exaristatus Sherff; Cosmos sulphureus Cav. var. hirsuticaulis Sherff	R		R		R	R			R	R			R	Native
Asteroideae	Anthemideae	Cotula mexicana (DC.) Cabrera	Cotula	mexicana	(DC.) Cabrera	Bol. Soc. Argent. Bot.	8(3-4)	207		1960	Soliva mexicana DC.	Hippia minuta L. f.; Gymnostyles minuta (L.f.) Spreng; Cotula minuta (L. f.) Schinz; Cotula minuta G. Forster; Lancisia minuta (L. f.) Rydb.; Soliva minuta (L. f.) Sweet; Soliva pedicellata Ruiz & Pav.; Gymnostyles peruviana Spreng; Cotula pedicellata (Ruiz & Pav.)Cabrera; Cotula pedicellata Compton; Cotula cabrerae Caro; Soliva pygmaea Kunth; Cotula pygmaea (Kunth) Benth. & Hook. ex Hemsl; Soliv…	R	R		R	R	R				R			R	Native
Cichorioideae	Cichorieae	Crepis sodiroi Hieron.	Crepis	sodiroi	Hieron.	Bot. Jahrb. Syst.	29(1)	84		1900								R								Endemic	Data Deficient
Mutisioideae	Nassauvieae	Criscia stricta (Spreng.) Katinas	Criscia	stricta	(Spreng.) Katinas	Bol. Soc. Argent. Bot.	30(1-2)	62		1994	Onoseris stricta Spreng., Trixis stricta (Spreng.) Less.	Perezia pampeana Speg.	R		R									R		Native
Asteroideae	Eupatorieae	Critonia arachnoidea (Legname) R.M. King & H. Rob.	Critonia	arachnoidea	(Legname) R.M. King & H. Rob.	Phytologia	49(1)	4		1981	Eupatorium arachnoideum Legname		R													Endemic
Asteroideae	Eupatorieae	Critonia billbergiana (Beurl.) R.M. King & H. Rob.	Critonia	billbergiana	(Beurl.) R.M. King & H. Rob.	Phytologia	22(1)	48		1971							R					R				Native
Asteroideae	Eupatorieae	Critonia eggersii (Hieron.) R.M. King & H. Rob.	Critonia	eggersii	(Hieron.) R.M. King & H. Rob.	Phytologia	22(1)	49		1971	Eupatorium eggersii Hieron.							R								Endemic	Vulnerable
Asteroideae	Eupatorieae	Critonia heteroneura Ernst	Critonia	heteroneura	Ernst	Flora	57	210		1874							R								R	Native
Asteroideae	Eupatorieae	Critonia megaphylla (Baker) R.M. King & H. Rob.	Critonia	megaphylla	(Baker) R.M. King & H. Rob.	Phytologia	49(1)	4		1981	Eupatorium megaphyllum Baker		R		R						R					Native
Asteroideae	Eupatorieae	Critonia morifolia (Mill.) R.M. King & H. Rob.	Critonia	morifolia	(Mill.) R.M. King & H. Rob.	Phytologia	22(1)	49		1971	Eupatorium morifolium Mill.			R	R		R	R				R			R	Native	Least Concern
Asteroideae	Eupatorieae	Critonia naiguatensis (V.M. Badillo) R.M. King & H. Rob.	Critonia	naiguatensis	(V.M. Badillo) R.M. King & H. Rob.	Phytologia	35(6)	499		1977															R	Endemic
Asteroideae	Eupatorieae	Critoniella acuminata (Kunth) R.M. King & H. Rob.	Critoniella	acuminata	(Kunth) R.M. King & H. Rob.	Phytologia	30(4)	285		1975	Eupatorium acuminatum Kunth						R	R				R			R	Native	Least Concern
Asteroideae	Eupatorieae	Critoniella albertosmithii (B.L. Rob.) R.M. King & H. Rob.	Critoniella	albertosmithii	(B.L. Rob.) R.M. King & H. Rob.	Phytologia	30(4)	285		1975							R									Endemic
Asteroideae	Eupatorieae	Critoniella lebrijensis (B.L. Rob.) R.M. King & H. Rob.	Critoniella	lebrijensis	(B.L. Rob.) R.M. King & H. Rob.	Phytologia	30(4)	285		1975							R									Endemic
Asteroideae	Eupatorieae	Critoniella leucolithogena (B.L. Rob.) R.M. King & H. Rob.	Critoniella	leucolithogena	(B.L. Rob.) R.M. King & H. Rob.	Phytologia	32(3)	284		1975							R									Endemic
Asteroideae	Eupatorieae	Critoniella tenuifolia (Kunth) R.M. King & H. Rob.	Critoniella	tenuifolia	(Kunth) R.M. King & H. Rob.	Phytologia	53(6)	392		1983							R								R	Native
Asteroideae	Eupatorieae	Critoniella vargasiana (DC.) R.M. King & H. Rob.	Critoniella	vargasiana	(DC.) R.M. King & H. Rob.	Phytologia	30(4)	285		1975							R								R	Native
Vernonioideae	Vernonieae	Critoniopsis aristeguietae (Cuatrec.) H. Rob.	Critoniopsis	aristeguietae	(Cuatrec.) H. Rob.	Phytologia	76(1)	27		1994	Vernonia aristeguietae Cuatrec.														R	Endemic
Vernonioideae	Vernonieae	Critoniopsis ayabacensis Sagást. & M.O. Dillon	Critoniopsis	ayabacensis	Sagást. & M.O. Dillon	Arnaldoa	8(1)	26		2001												R				Endemic	Data Deficient
Vernonioideae	Vernonieae	Critoniopsis bitriflora (Cuatrec.) H. Rob.	Critoniopsis	bitriflora	(Cuatrec.) H. Rob.	Phytologia	46(7)	439		1980							R									Endemic	Least Concern
Vernonioideae	Vernonieae	Critoniopsis bogotana (Cuatrec.) H. Rob.	Critoniopsis	bogotana	(Cuatrec.) H. Rob.	Phytologia	46(7)	439		1980	Vernonia bogotana Cuatrec.						R	R								Native
Vernonioideae	Vernonieae	Critoniopsis boliviana (Britton) H. Rob.	Critoniopsis	boliviana	(Britton) H. Rob.	Proc. Biol. Soc. Washington	106(3)	609		1993	Vernonia boliviana Britton			R				R								Native
Vernonioideae	Vernonieae	Critoniopsis brachystephana (Cuatrec.) H. Rob.	Critoniopsis	brachystephana	(Cuatrec.) H. Rob.	Phytologia	46(7)	439		1980							R									Endemic
Vernonioideae	Vernonieae	Critoniopsis bradeana (G.M. Barroso) G. Soares & Loeuille	Critoniopsis	bradeana	(G.M. Barroso) G. Soares & Loeuille	Phytotaxa	522(2)	140		2021					R											Endemic
Vernonioideae	Vernonieae	Critoniopsis cajamarcensis (H. Rob.) H. Rob.	Critoniopsis	cajamarcensis	(H. Rob.) H. Rob.	Proc. Biol. Soc. Washington	106(3)	610		1993				R			R					R				Native
Vernonioideae	Vernonieae	Critoniopsis canaliculata M. Monge & Semir	Critoniopsis	canaliculata	M. Monge & Semir	Syst. Bot.	44(2)	442		2019					R											Endemic
Vernonioideae	Vernonieae	Critoniopsis cerulosa X. Haro & H. Rob.	Critoniopsis	cerulosa	X. Haro & H. Rob.	Proc. Biol. Soc. Washington	121(1)	4	f. 1, 4c–f	2008								R								Endemic
Vernonioideae	Vernonieae	Critoniopsis choquetangensis H. Rob.	Critoniopsis	choquetangensis	H. Rob.	Phytologia	78(5)	386		1995				R												Endemic
Vernonioideae	Vernonieae	Critoniopsis cinerea S. Díaz & S. Obando	Critoniopsis	cinerea	S. Díaz & S. Obando	Revista Acad. Colomb. Ci. Exact.	26(100)	350		2002							R									Endemic	Critically Endangered
Vernonioideae	Vernonieae	Critoniopsis cotopaxensis H. Rob.	Critoniopsis	cotopaxensis	H. Rob.	Proc. Biol. Soc. Washington	106(3)	610		1993								R								Endemic	Vulnerable
Vernonioideae	Vernonieae	Critoniopsis cuatrecasasii H. Rob.	Critoniopsis	cuatrecasasii	H. Rob.	Phytologia	46(7)	439		1980							R									Endemic	Critically Endangered
Vernonioideae	Vernonieae	Critoniopsis dorrii H. Rob.	Critoniopsis	dorrii	H. Rob.	Proc. Biol. Soc. Washington	106(3)	612		1993								R								Endemic	Endangered
Vernonioideae	Vernonieae	Critoniopsis elbertiana (Cuatrec.) H. Rob.	Critoniopsis	elbertiana	(Cuatrec.) H. Rob.	Phytologia	46(7)	440		1980	Vernonia elbertiana Cuatrec.						R	R								Native
Vernonioideae	Vernonieae	Critoniopsis floribunda (Kunth) H. Rob.	Critoniopsis	floribunda	(Kunth) H. Rob.	Phytologia	46(7)	440		1980	Vernonia floribunda Kunth, Senecio floribundus (Kunth) Sch. Bip. ex Hieron.							R								Endemic
Vernonioideae	Vernonieae	Critoniopsis franciscana (Cuatrec.) H. Rob.	Critoniopsis	franciscana	(Cuatrec.) H. Rob.	Phytologia	46(7)	440		1980							R									Endemic	Critically Endangered
Vernonioideae	Vernonieae	Critoniopsis glandulata (Cuatrec.) H. Rob.	Critoniopsis	glandulata	(Cuatrec.) H. Rob.	Phytologia	46(7)	440		1980							R								R	Native	Vulnerable
Vernonioideae	Vernonieae	Critoniopsis gynoxiifolia H. Rob.	Critoniopsis	gynoxiifolia	H. Rob.	Phytologia	78(5)	387		1995												R				Endemic
Vernonioideae	Vernonieae	Critoniopsis harlingii (H. Rob.) H. Rob.	Critoniopsis	harlingii	(H. Rob.) H. Rob.	Proc. Biol. Soc. Washington	106(3)	614		1993	Vernonia harlingii H. Rob.							R								Endemic	Vulnerable
Vernonioideae	Vernonieae	Critoniopsis hermogenesii M. Monge & Semir	Critoniopsis	hermogenesii	M. Monge & Semir	Phytotaxa	397(2)	178		2019					R											Endemic
Vernonioideae	Vernonieae	Critoniopsis huairacajana (Hieron.) H. Rob.	Critoniopsis	huairacajana	(Hieron.) H. Rob.	Phytologia	46(7)	440		1980	Vernonia huairacajana Hieron.							R								Endemic
Vernonioideae	Vernonieae	Critoniopsis huilensis (Cuatrec.) H. Rob.	Critoniopsis	huilensis	(Cuatrec.) H. Rob.	Phytologia	46(7)	440		1980							R									Endemic
Vernonioideae	Vernonieae	Critoniopsis jalcana (Cuatrec.) H. Rob.	Critoniopsis	jalcana	(Cuatrec.) H. Rob.	Proc. Biol. Soc. Washington	106(3)	615		1993												R				Endemic
Vernonioideae	Vernonieae	Critoniopsis jaramilloi Pruski & H. Rob.	Critoniopsis	jaramilloi	Pruski & H. Rob.	Phytologia	78(5)	388		1995								R								Endemic	Vulnerable
Vernonioideae	Vernonieae	Critoniopsis jelskii (Hieron.) H. Rob.	Critoniopsis	jelskii	(Hieron.) H. Rob.	Phytologia	46(7)	440		1980												R				Endemic
Vernonioideae	Vernonieae	Critoniopsis jubifera (Rusby) H. Rob.	Critoniopsis	jubifera	(Rusby) H. Rob.	Proc. Biol. Soc. Washington	106(3)	615		1993				R												Endemic
Vernonioideae	Vernonieae	Critoniopsis killipii (Cuatrec.) H. Rob.	Critoniopsis	killipii	(Cuatrec.) H. Rob.	Phytologia	46(7)	440		1980							R								R	Native
Vernonioideae	Vernonieae	Critoniopsis lewisii H. Rob.	Critoniopsis	lewisii	H. Rob.	Proc. Biol. Soc. Washington	106(3)	615		1993				R												Endemic
Vernonioideae	Vernonieae	Critoniopsis lindenii Sch. Bip.	Critoniopsis	lindenii	Sch. Bip.	Jahresber. Pollichia	20–21	431		1863							R									Endemic	Least Concern
Vernonioideae	Vernonieae	Critoniopsis macrofoliata H. Rob.	Critoniopsis	macrofoliata	H. Rob.	Phytologia	87(2)	88		2005												R				Endemic
Vernonioideae	Vernonieae	Critoniopsis magdalenae (G.M. Barroso) H. Rob.	Critoniopsis	magdalenae	(G.M. Barroso) H. Rob.	Proc. Biol. Soc. Washington	106(3)	617		1993	Vernonia magdalenae G.M. Barroso				R											Endemic
Vernonioideae	Vernonieae	Critoniopsis meridensis (V.M. Badillo) V.M. Badillo	Critoniopsis	meridensis	(V.M. Badillo) V.M. Badillo	Ernstia	16	16		1983															R	Endemic	Vulnerable
Vernonioideae	Vernonieae	Critoniopsis mucida (Cuatrec.) H. Rob.	Critoniopsis	mucida	(Cuatrec.) H. Rob.	Phytologia	46(7)	440		1980							R									Endemic	Least Concern
Vernonioideae	Vernonieae	Critoniopsis nonoensis (Benoist) H. Rob.	Critoniopsis	nonoensis	(Benoist) H. Rob.	Smithsonian Contr. Bot.	89	64		1999	Vernonia nonoensis Benoist							R								Endemic
Vernonioideae	Vernonieae	Critoniopsis oblongifolia Sagást. & M.O. Dillon	Critoniopsis	oblongifolia	Sagást. & M.O. Dillon	Arnaldoa	5(1)	20		1998												R				Endemic
Vernonioideae	Vernonieae	Critoniopsis occidentalis (Cuatrec.) H. Rob.	Critoniopsis	occidentalis	(Cuatrec.) H. Rob.	Phytologia	46(7)	440		1980	Vernonia occidentalis Cuatrec.						R	R								Native
Vernonioideae	Vernonieae	Critoniopsis palaciosii H. Rob.	Critoniopsis	palaciosii	H. Rob.	Proc. Biol. Soc. Washington	106(3)	617	f. 3	1993								R								Endemic	Vulnerable
Vernonioideae	Vernonieae	Critoniopsis pallida (Cuatrec.) H. Rob.	Critoniopsis	pallida	(Cuatrec.) H. Rob.	Phytologia	46(7)	440		1980							R									Endemic	Least Concern
Vernonioideae	Vernonieae	Critoniopsis paradoxa (Sch. Bip.) V.M. Badillo	Critoniopsis	paradoxa	(Sch. Bip.) V.M. Badillo	Ernstia	16	16		1983															R	Endemic	Least Concern
Vernonioideae	Vernonieae	Critoniopsis paucartambensis (M.O. Dillon) H. Rob.	Critoniopsis	paucartambensis	(M.O. Dillon) H. Rob.	Proc. Biol. Soc. Washington	106(3)	619		1993												R				Endemic
Vernonioideae	Vernonieae	Critoniopsis pendula (Cuatrec.) H. Rob.	Critoniopsis	pendula	(Cuatrec.) H. Rob.	Phytologia	46(7)	440		1980							R									Endemic
Vernonioideae	Vernonieae	Critoniopsis persetosa X. Haro & H. Rob.	Critoniopsis	persetosa	X. Haro & H. Rob.	Proc. Biol. Soc. Washington	121(1)	12	f. 2	2008								R								Endemic
Vernonioideae	Vernonieae	Critoniopsis peruviana (Cuatrec.) H. Rob.	Critoniopsis	peruviana	(Cuatrec.) H. Rob.	Proc. Biol. Soc. Washington	106(3)	619		1993												R				Endemic
Vernonioideae	Vernonieae	Critoniopsis popayanensis (Cuatrec.) H. Rob.	Critoniopsis	popayanensis	(Cuatrec.) H. Rob.	Phytologia	46(7)	440		1980							R									Endemic	Vulnerable
Vernonioideae	Vernonieae	Critoniopsis pycnantha (Benth.) H. Rob.	Critoniopsis	pycnantha	(Benth.) H. Rob.	Phytologia	46(7)	441		1980	Vernonia pycnantha Benth., Tephrothamnus pycnanthus (Benth.) Sch. Bip.			R			R	R				R				Native
Vernonioideae	Vernonieae	Critoniopsis quillonensis H. Rob.	Critoniopsis	quillonensis	H. Rob.	Proc. Biol. Soc. Washington	106(3)	620		1993												R				Endemic
Vernonioideae	Vernonieae	Critoniopsis quinqueflora (Less.) H. Rob.	Critoniopsis	quinqueflora	(Less.) H. Rob.	Proc. Biol. Soc. Washington	106(3)	621		1993	Vernonia quinqueflora Less., Cacalia quinqueflora (Less.) Kuntze				R											Endemic	Least Concern
Vernonioideae	Vernonieae	Critoniopsis sagasteguii (M.O. Dillon) H. Rob.	Critoniopsis	sagasteguii	(M.O. Dillon) H. Rob.	Proc. Biol. Soc. Washington	106(3)	621		1993												R				Endemic
Vernonioideae	Vernonieae	Critoniopsis sevillana (Cuatrec.) H. Rob.	Critoniopsis	sevillana	(Cuatrec.) H. Rob.	Phytologia	46(7)	441		1980	Vernonia sevillana Cuatrec., Critoniopsis floribunda var. sevillana (Cuatrec.) X. Haro & H. Rob.							R								Endemic	Vulnerable
Vernonioideae	Vernonieae	Critoniopsis sodiroi (Hieron.) H. Rob.	Critoniopsis	sodiroi	(Hieron.) H. Rob.	Phytologia	69(2)	105		1990	Piptocarpha sodiroi Hieron.							R								Endemic	Near Threatened
Vernonioideae	Vernonieae	Critoniopsis steinbachii H. Rob.	Critoniopsis	steinbachii	H. Rob.	Proc. Biol. Soc. Washington	106(3)	622		1993				R												Endemic
Vernonioideae	Vernonieae	Critoniopsis stellata (Spreng.) H. Rob.	Critoniopsis	stellata	(Spreng.) H. Rob.	Proc. Biol. Soc. Washington	106(3)	622		1993	Conyza stellata Spreng., Vernonanthura stellata (Spreng.) H. Rob., Vernonia stellata (Spreng.) S.F. Blake				R											Endemic
Vernonioideae	Vernonieae	Critoniopsis suaveolens (Kunth) H. Rob.	Critoniopsis	suaveolens	(Kunth) H. Rob.	Phytologia	46(7)	441		1980	Vernonia suaveolens Kunth, Cacalia suaveolens (Kunth) Kuntze							R								Endemic
Vernonioideae	Vernonieae	Critoniopsis tamana V.M. Badillo	Critoniopsis	tamana	V.M. Badillo	Ernstia	53	10		1989															R	Endemic	Data Deficient
Vernonioideae	Vernonieae	Critoniopsis tungurahuae (Benoist) H. Rob.	Critoniopsis	tungurahuae	(Benoist) H. Rob.	Phytologia	46(7)	441		1980	Vernonia tungurahuae Benoist						R	R								Native	Near Threatened
Vernonioideae	Vernonieae	Critoniopsis turmalensis V.M. Badillo	Critoniopsis	turmalensis	V.M. Badillo	Ernstia	53	12		1989															R	Endemic	Critically Endangered
Vernonioideae	Vernonieae	Critoniopsis unguiculata (Cuatrec.) H. Rob.	Critoniopsis	unguiculata	(Cuatrec.) H. Rob.	Phytologia	46(7)	441		1980							R									Endemic
Vernonioideae	Vernonieae	Critoniopsis uniflosculosa (Cuatrec.) H. Rob.	Critoniopsis	uniflosculosa	(Cuatrec.) H. Rob.	Phytologia	46(7)	441		1980							R									Endemic
Vernonioideae	Vernonieae	Critoniopsis uribei H. Rob.	Critoniopsis	uribei	H. Rob.	Proc. Biol. Soc. Washington	106(3)	625		1993							R									Endemic	Critically Endangered
Vernonioideae	Vernonieae	Critoniopsis ursicola (Cuatrec.) H. Rob.	Critoniopsis	ursicola	(Cuatrec.) H. Rob.	Phytologia	46(7)	441		1980							R									Endemic	Endangered
Vernonioideae	Vernonieae	Critoniopsis woytkowskii (S.B. Jones) H. Rob.	Critoniopsis	woytkowskii	(S.B. Jones) H. Rob.	Proc. Biol. Soc. Washington	106(3)	626		1993												R				Endemic
Vernonioideae	Vernonieae	Critoniopsis yamboyensis (Benoist) H. Rob.	Critoniopsis	yamboyensis	(Benoist) H. Rob.	Proc. Biol. Soc. Washington	106(3)	626		1993	Vernonia yamboyensis Benoist							R								Endemic	Endangered
Vernonioideae	Vernonieae	Critoniopsis yungasensis (Britton) H. Rob.	Critoniopsis	yungasensis	(Britton) H. Rob.	Proc. Biol. Soc. Washington	106(3)	626		1993				R												Endemic
Vernonioideae	Vernonieae	Critoniopsis zamorensis X. Haro & H. Rob.	Critoniopsis	zamorensis	X. Haro & H. Rob.	Proc. Biol. Soc. Washington	121(1)	17	f. 3	2008								R								Endemic
Vernonioideae	Vernonieae	Critoniopsis zarucchii H. Rob.	Critoniopsis	zarucchii	H. Rob.	Phytologia	78(5)	389		1995							R									Endemic
Asteroideae	Eupatorieae	Cronquistianthus bishopii R.M. King & H. Rob.	Cronquistianthus	bishopii	R.M. King & H. Rob.	Phytologia	54(1)	40		1983												R				Endemic
Asteroideae	Eupatorieae	Cronquistianthus bullifer (S.F. Blake) R.M. King & H. Rob.	Cronquistianthus	bullifer	(S.F. Blake) R.M. King & H. Rob.	Phytologia	49(1)	4		1981	Eupatorium bulliferum S.F. Blake							R								Endemic	Vulnerable
Asteroideae	Eupatorieae	Cronquistianthus callacatensis (Hieron.) R.M. King & H. Rob.	Cronquistianthus	callacatensis	(Hieron.) R.M. King & H. Rob.	Phytologia	32(3)	284		1975												R				Endemic
Asteroideae	Eupatorieae	Cronquistianthus celendinensis R.M. King & H. Rob.	Cronquistianthus	celendinensis	R.M. King & H. Rob.	Phytologia	51(3)	179		1982												R				Endemic
Asteroideae	Eupatorieae	Cronquistianthus chachapoyensis R.M. King & H. Rob.	Cronquistianthus	chachapoyensis	R.M. King & H. Rob.	Phytologia	51(3)	180		1982												R				Endemic
Asteroideae	Eupatorieae	Cronquistianthus chamaedrifolius (Kunth) R.M. King & H. Rob.	Cronquistianthus	chamaedrifolius	(Kunth) R.M. King & H. Rob.	Phytologia	23(5)	410		1972	Eupatorium chamaedrifolium Kunth							R				R				Native
Asteroideae	Eupatorieae	Cronquistianthus desmophyllus (B.L. Rob.) R.M. King & H. Rob.	Cronquistianthus	desmophyllus	(B.L. Rob.) R.M. King & H. Rob.	Phytologia	23(5)	411		1972												R				Endemic
Asteroideae	Eupatorieae	Cronquistianthus determinatus (B.L. Rob.) R.M. King & H. Rob.	Cronquistianthus	determinatus	(B.L. Rob.) R.M. King & H. Rob.	Phytologia	51(3)	181		1982												R				Endemic
Asteroideae	Eupatorieae	Cronquistianthus ferreyrii R.M. King & H. Rob.	Cronquistianthus	ferreyrii	R.M. King & H. Rob.	Phytologia	27(6)	395		1974												R				Endemic
Asteroideae	Eupatorieae	Cronquistianthus glomeratus (DC.) R.M. King & H. Rob.	Cronquistianthus	glomeratus	(DC.) R.M. King & H. Rob.	Phytologia	23(5)	411		1972												R				Endemic
Asteroideae	Eupatorieae	Cronquistianthus lavandulifolius (DC.) R.M. King & H. Rob.	Cronquistianthus	lavandulifolius	(DC.) R.M. King & H. Rob.	Phytologia	23(5)	411		1972												R				Endemic
Asteroideae	Eupatorieae	Cronquistianthus leucophyllus (Kunth) R.M. King & H. Rob.	Cronquistianthus	leucophyllus	(Kunth) R.M. King & H. Rob.	Phytologia	23(5)	411		1972	Eupatorium leucophyllum Kunth							R				R				Native
Asteroideae	Eupatorieae	Cronquistianthus lopez-mirandae (Cabrera) R.M. King & H. Rob.	Cronquistianthus	lopez-mirandae	(Cabrera) R.M. King & H. Rob.	Phytologia	54(1)	40		1983												R				Endemic
Asteroideae	Eupatorieae	Cronquistianthus loxensis R.M. King & H. Rob.	Cronquistianthus	loxensis	R.M. King & H. Rob.	Phytologia	65(1)	63		1988								R								Endemic	Near Threatened
Asteroideae	Eupatorieae	Cronquistianthus macbridei R.M. King & H. Rob.	Cronquistianthus	macbridei	R.M. King & H. Rob.	Phytologia	51(3)	182		1982												R				Endemic
Asteroideae	Eupatorieae	Cronquistianthus marrubiifolius (Hieron.) R.M. King & H. Rob.	Cronquistianthus	marrubiifolius	(Hieron.) R.M. King & H. Rob.	Phytologia	27(6)	396		1974												R				Endemic
Asteroideae	Eupatorieae	Cronquistianthus niveus (Kunth) R.M. King & H. Rob.	Cronquistianthus	niveus	(Kunth) R.M. King & H. Rob.	Phytologia	23(5)	411		1972	Eupatorium niveum Kunth						R	R								Native	Vulnerable
Asteroideae	Eupatorieae	Cronquistianthus origanoides (Kunth) R.M. King & H. Rob.	Cronquistianthus	origanoides	(Kunth) R.M. King & H. Rob.	Phytologia	23(5)	411		1972	Eupatorium origanoides Kunth							R								Endemic	Vulnerable
Asteroideae	Eupatorieae	Cronquistianthus pseudoriganoides (Hieron.) R.M. King & H. Rob.	Cronquistianthus	pseudoriganoides	(Hieron.) R.M. King & H. Rob.	Phytologia	23(5)	411		1972	Eupatorium pseudoriganoides Hieron.							R								Endemic
Asteroideae	Eupatorieae	Cronquistianthus rosei R.M. King & H. Rob.	Cronquistianthus	rosei	R.M. King & H. Rob.	Phytologia	51(3)	182		1982	Eupatorium rosei (R.M. King & H. Rob.) B.L. Turner	Eupatorium rosei (R.M. King & H. Rob.) B.L. Turner						R								Endemic	Endangered
Asteroideae	Eupatorieae	Cronquistianthus trianae R.M. King & H. Rob.	Cronquistianthus	trianae	R.M. King & H. Rob.	Phytologia	56(4)	252		1984							R	R								Native
Asteroideae	Eupatorieae	Cronquistianthus urubambensis (B.L. Rob.) R.M. King & H. Rob.	Cronquistianthus	urubambensis	(B.L. Rob.) R.M. King & H. Rob.	Phytologia	23(5)	411		1972												R				Endemic
Asteroideae	Eupatorieae	Cronquistianthus volkensii (Hieron.) R.M. King & H. Rob.	Cronquistianthus	volkensii	(Hieron.) R.M. King & H. Rob.	Phytologia	23(5)	411		1972												R				Endemic
Asteroideae	Eupatorieae	Crossothamnus gentryi R.M. King & H. Rob.	Crossothamnus	gentryi	R.M. King & H. Rob.	Phytologia	78(5)	382		1995								R								Endemic	Vulnerable
Asteroideae	Eupatorieae	Crossothamnus pascoanus B.L. Turner & M.O. Dillon	Crossothamnus	pascoanus	B.L. Turner & M.O. Dillon	Phytologia	69(6)	420		1990												R				Endemic
Asteroideae	Eupatorieae	Crossothamnus weberbaueri (Hieron.) R.M. King & H. Rob.	Crossothamnus	weberbaueri	(Hieron.) R.M. King & H. Rob.	Phytologia	24(2)	78		1972												R				Endemic
Vernonioideae	Vernonieae	Cuatrecasanthus flexipappus (Gleason) H. Rob.	Cuatrecasanthus	flexipappus	(Gleason) H. Rob.	Revista Acad. Colomb. Ci. Exact.	17(65)	210		1989	Vernonia flexipappa Gleason							R								Endemic	Endangered
Vernonioideae	Vernonieae	Cuatrecasanthus giannasii (Stutts) H. Rob. & V.A. Funk	Cuatrecasanthus	giannasii	(Stutts) H. Rob. & V.A. Funk	PhytoKeys	14	32		2012	Vernonia giannasii Stutts							R								Endemic
Vernonioideae	Vernonieae	Cuatrecasanthus jelskii (Hieron.) H. Rob.	Cuatrecasanthus	jelskii	(Hieron.) H. Rob.	Revista Acad. Colomb. Ci. Exact.	17(65)	210		1989												R				Endemic
Vernonioideae	Vernonieae	Cuatrecasanthus kingii H. Rob. & V.A. Funk	Cuatrecasanthus	kingii	H. Rob. & V.A. Funk	PhytoKeys	14	34		2012								R								Endemic
Vernonioideae	Vernonieae	Cuatrecasanthus lanceolatus H. Rob. & V.A. Funk	Cuatrecasanthus	lanceolatus	H. Rob. & V.A. Funk	PhytoKeys	14	36		2012								R								Endemic
Vernonioideae	Vernonieae	Cuatrecasanthus sandemanii (H. Rob. & B. Kahn) H. Rob.	Cuatrecasanthus	sandemanii	(H. Rob. & B. Kahn) H. Rob.	Revista Acad. Colomb. Ci. Exact.	17(65)	210		1989												R				Endemic
Asteroideae	Gnaphalieae	Cuatrecasasiella argentina (Cabrera) H. Rob.	Cuatrecasasiella	argentina	(Cabrera) H. Rob.	Fl. Neotrop. Monogr.	2(Suppl.)	15		1985	Luciliopsis argentina Cabrera		R	R		R										Native
Asteroideae	Gnaphalieae	Cuatrecasasiella isernii (Cuatrec.) H. Rob.	Cuatrecasasiella	isernii	(Cuatrec.) H. Rob.	Fl. Neotrop. Monogr.	2(Suppl.)	15		1985	Luciliopsis isernii Cuatrec.							R				R				Native
Asteroideae	Senecioneae	Culcitium canescens Bonpl.	Culcitium	canescens	Bonpl.	Pl. Aequinoct.	2(9)	4	t. 67	1809[1808]	Senecio canescens (Bonpl.) Cuatrec., Culcitium rufescens var. canescens (Bonpl.) Benoist.	Culcitium boyacense Cuatr., Culcitium rufescens Bonpl.		R			R	R				R			R	Native	Least Concern
Asteroideae	Senecioneae	Culcitium cocuyanum Cuatrec.	Culcitium	cocuyanum	Cuatrec.	Caldasia	1	5		1940		Culcitium santanderense Cuatr., Senecio cocuyanus (Cuatr.) Cuatr.					R									Endemic
Asteroideae	Senecioneae	Culcitium humile DC.	Culcitium	humile	DC.	Prodr. [A. P. de Candolle]	6	325		1838		Culcitium glaciale Meyen & Walp., Senecio glacialis (Meyen & Walp.) Cuatrec., Senecio mandonianus Wedd., Senecio anacephalus Griseb., Senecio candollei Wedd., Senecio modestus Wedd.	R	R		R						R				Native
Asteroideae	Senecioneae	Culcitium nivale Kunth	Culcitium	nivale	Kunth	Nov. Gen. Sp. (folio ed.)	4(16)	134		1820[1818]		Culcitium haenkei Wedd., Culcitium neaei (DC.) Sch. Bip. ex Wedd., Culcitium nivale var. neaei DC., Senecio haenkeanus Cuatrec.		R		R	R	R				R				Native
Asteroideae	Senecioneae	Culcitium oligocephalum Cabrera	Culcitium	oligocephalum	Cabrera	Darwiniana	9(1)	47		1949		Culcitium albifolium Zöllner, Senecio keshua Cabrera, Senecio zoellneri Martic. & Quezada	R	R		R										Native
Asteroideae	Coreopsideae	Cyathomone sodiroi (Hieron.) S.F. Blake	Cyathomone	sodiroi	(Hieron.) S.F. Blake	J. Wash. Acad. Sci.	13(6)	105		1923	Narvalina sodiroi Hieron.							R								Endemic	Data Deficient
Mutisioideae	Mutisieae	Cyclolepis genistoides Gillies ex D. Don	Cyclolepis	genistoides	Gillies ex D. Don	Philos. Mag. Ann. Chem.	11	892		1832		Gochnatia genistoides (D. Don) Hook. & Arn.	R								R					Native
Asteroideae	Millerieae	Cymophora venezuelensis (Aristeg. & Cuatrec.) Canne-Hill.	Cymophora	venezuelensis	(Aristeg. & Cuatrec.) Canne-Hill.	Madroño	24(3)	190		1977	Tridax venezuelensis Aristeg. & Cuatrec.														R	Endemic
Vernonioideae	Vernonieae	Cyrtocymura cincta (Griseb.) H. Rob.	Cyrtocymura	cincta	(Griseb.) H. Rob.	Proc. Biol. Soc. Washington	100(4)	851		1987	Vernonia cincta Griseb., Cacalia cincta (Griseb.) Kuntze, Vernonia scorpioides var. cincta (Griseb.) Cabrera		R	R	R						R					Native
Vernonioideae	Vernonieae	Cyrtocymura harleyi (H. Rob.) H. Rob.	Cyrtocymura	harleyi	(H. Rob.) H. Rob.	Proc. Biol. Soc. Washington	100(4)	852		1987	Vernonia harleyi H. Rob.				R											Endemic
Vernonioideae	Vernonieae	Cyrtocymura lanuginosa (Gardner) H. Rob.	Cyrtocymura	lanuginosa	(Gardner) H. Rob.	Proc. Biol. Soc. Washington	100(4)	852		1987	Vernonia lanuginosa Gardner				R											Endemic
Vernonioideae	Vernonieae	Cyrtocymura mattos-silvae (H. Rob.) H. Rob.	Cyrtocymura	mattos-silvae	(H. Rob.) H. Rob.	Proc. Biol. Soc. Washington	100(4)	852		1987	Vernonia mattos-silvae H. Rob.				R											Endemic
Vernonioideae	Vernonieae	Cyrtocymura scorpioides (Lam.) H. Rob.	Cyrtocymura	scorpioides	(Lam.) H. Rob.	Proc. Biol. Soc. Washington	100(4)	852		1987	Conyza scorpioides Lam., Cacalia scorpioides (Lam.) Kuntze, Lepidaploa scorpioides (Lam.) Cass., Vernonia scorpioides (Lam.) Pers.	Conyza scorpioides Lam., Vernonia scorpioides (Lam.) Pers., Lepidaploa scorpioides (Lam.) Cass., Cacalia scorpioides (Lam.) Kuntze, Vernonia subrepanda Pers., Vernonia scorpioides (Lam.) Pers. var. subrepanda (Pers.) DC., Vernonia tournefortioides Kunth, Vernonia centriflora Link & Otto, Vernonia flavescens Less., Vernonia scorpioides (Lam.) Pers. var. longifolia DC., Vernonia scorpioides (Lam.) …	R	R	R		R	R	R	R	R	R	R	R	R	Native
Asteroideae	Coreopsideae	Dahlia coccinea Cav.	Dahlia	coccinea	Cav.	Icon. [Cavanilles]	3(2)	33	pl. 266	1795-1796					R											Endemic
Asteroideae	Coreopsideae	Dahlia imperialis Roezl ex Ortgies	Dahlia	imperialis	Roezl ex Ortgies	Gartenflora	12	243	t. 407	1863					R		R									Native	Near Threatened
Asteroideae	Coreopsideae	Dahlia merckii Lehm.	Dahlia	merckii	Lehm.	Del. Sem. Hort. Hamburg.	1839	4		1839					R											Endemic
Asteroideae	Astereae	Darwiniothamnus lancifolius (Hook. f.) Harling	Darwiniothamnus	lancifolius	(Hook. f.) Harling	Acta Horti Berg.	20(3)	115		1962	Erigeron lancifolius Hook. f.							R								Endemic	Lower Risk/near threatened
Asteroideae	Astereae	Darwiniothamnus tenuifolius (Hook. f.) Harling	Darwiniothamnus	tenuifolius	(Hook. f.) Harling	Acta Horti Berg.	20(3)	109		1962	Erigeron tenuifolius Hook. f.							R								Endemic	Lower Risk/near threatened
Vernonioideae	Vernonieae	Dasyandantha cuatrecasasiana (Aristeg.) H. Rob.	Dasyandantha	cuatrecasasiana	(Aristeg.) H. Rob.	Proc. Biol. Soc. Washington	106(4)	778		1993															R	Endemic
Vernonioideae	Vernonieae	Dasyanthina palustris (Gardner) H. Rob.	Dasyanthina	palustris	(Gardner) H. Rob.	Proc. Biol. Soc. Washington	106(4)	780		1993	Vernonia palustris Gardner				R						R					Native
Vernonioideae	Vernonieae	Dasyanthina serrata (Less.) H. Rob.	Dasyanthina	serrata	(Less.) H. Rob.	Proc. Biol. Soc. Washington	106(4)	780		1993	Vernonia serrata Less., Cacalia serrata (Less.) Kuntze				R											Endemic
Asteroideae	Eupatorieae	Dasycondylus debeauxii (B.L. Rob.) R.M. King & H. Rob.	Dasycondylus	debeauxii	(B.L. Rob.) R.M. King & H. Rob.	Phytologia	24(3)	189		1972	Eupatorium debeauxii B.L. Rob.				R											Endemic
Asteroideae	Eupatorieae	Dasycondylus dusenii R.M. King & H. Rob.	Dasycondylus	dusenii	R.M. King & H. Rob.	Phytologia	24(3)	189		1972					R											Endemic
Asteroideae	Eupatorieae	Dasycondylus hirsutissimus (Baker) R.M. King & H. Rob.	Dasycondylus	hirsutissimus	(Baker) R.M. King & H. Rob.	Phytologia	60(1)	80		1986	Eupatorium hirsutissimum Baker				R											Endemic
Asteroideae	Eupatorieae	Dasycondylus lobbii (Klatt) R.M. King & H. Rob.	Dasycondylus	lobbii	(Klatt) R.M. King & H. Rob.	Phytologia	24(3)	190		1972				R								R				Native
Asteroideae	Eupatorieae	Dasycondylus platylepis (Baker) R.M. King & H. Rob.	Dasycondylus	platylepis	(Baker) R.M. King & H. Rob.	Phytologia	24(3)	190		1972	Eupatorium platylepis Baker				R											Endemic
Asteroideae	Eupatorieae	Dasycondylus regnellii R.M. King & H. Rob.	Dasycondylus	regnellii	R.M. King & H. Rob.	Phytologia	24(3)	190		1972					R											Endemic
Asteroideae	Eupatorieae	Dasycondylus resinosus (Spreng.) R.M. King & H. Rob.	Dasycondylus	resinosus	(Spreng.) R.M. King & H. Rob.	Phytologia	24(3)	191		1972	Mikania resinosa Spreng., Conoclinium resinosum (Spreng.) Sch. Bip. ex Baker, Willoughbya resinosa (Spreng.) Kuntze				R											Endemic
Barnadesioideae	Barnadesieae	Dasyphyllum argenteum Kunth	Dasyphyllum	argenteum	Kunth	Nov. Gen. Sp. (folio ed.)	4(14)	14		1820[1818]	Chuquiraga argentea (Kunth) Hieron., Flotovia argentea (Kunth) Wedd.	Chuquiraga argentea (Kunth) Hieron., Flotovia argentea (Kunth) Wedd.						R								Endemic	Vulnerable
Barnadesioideae	Barnadesieae	Dasyphyllum armatum (J. Kost.) Cabrera	Dasyphyllum	armatum	(J. Kost.) Cabrera	Revista Mus. La Plata, Secc. Bot.	9(38)	51		1959	Chuquiraga armata J. Kost., Flotovia armata (J. Kost.) Tovar		R	R												Native
Barnadesioideae	Barnadesieae	Dasyphyllum brasiliense (Spreng.) Cabrera	Dasyphyllum	brasiliense	(Spreng.) Cabrera	Revista Mus. La Plata, Secc. Bot.	9(38)	72[74]		1959	Ioannea brasiliensis Spreng., Chuquiraga brasiliensis (Spreng.) Kuntze,	Carthamus fluminensis Vell., Chuquiraga racemosa Baker, Dasyphyllum brasiliense (Spreng.) Cabrera var. divaricatum (Griseb.) Cabrera, Barnadesia divaricata Griseb., Flotovia divaricata (Griseb.) Hieron., Chuquiraga brasiliensis (Spreng.) Kuntze var. divaricata (Griseb.) Kuntze	R	R	R						R	R				Native	Least Concern
Barnadesioideae	Barnadesieae	Dasyphyllum brevispinum Sagást. & M.O. Dillon	Dasyphyllum	brevispinum	Sagást. & M.O. Dillon	Brittonia	37(1)	6		1985												R				Endemic
Barnadesioideae	Barnadesieae	Dasyphyllum cabrerae Sagást.	Dasyphyllum	cabrerae	Sagást.	Bol. Soc. Argent. Bot.	19(1-2)	61		1980												R				Endemic
Barnadesioideae	Barnadesieae	Dasyphyllum colombianum (Cuatrec.) Cabrera	Dasyphyllum	colombianum	(Cuatrec.) Cabrera	Revista Mus. La Plata, Secc. Bot.	9(38)	67		1959							R									Endemic
Barnadesioideae	Barnadesieae	Dasyphyllum cryptocephalum (Baker) Cabrera	Dasyphyllum	cryptocephalum	(Baker) Cabrera	Revista Mus. La Plata, Secc. Bot.	9(38)	82		1959					R											Endemic
Barnadesioideae	Barnadesieae	Dasyphyllum diamantinense Saavedra & M. Monge	Dasyphyllum	diamantinense	Saavedra & M. Monge	Phytotaxa	174(4)	231		2014					R											Endemic
Barnadesioideae	Barnadesieae	Dasyphyllum donianum (Gardner) Cabrera	Dasyphyllum	donianum	(Gardner) Cabrera	Revista Mus. La Plata, Secc. Bot.	9(38)	87		1959					R						R					Native
Barnadesioideae	Barnadesieae	Dasyphyllum ferox (Wedd.) Cabrera	Dasyphyllum	ferox	(Wedd.) Cabrera	Revista Mus. La Plata, Secc. Bot.	9(38)	54		1959				R								R				Native
Barnadesioideae	Barnadesieae	Dasyphyllum flagellare (Casar.) Cabrera	Dasyphyllum	flagellare	(Casar.) Cabrera	Revista Mus. La Plata, Secc. Bot.	9(38)	60		1959					R											Endemic
Barnadesioideae	Barnadesieae	Dasyphyllum floribundum (Gardner) Cabrera	Dasyphyllum	floribundum	(Gardner) Cabrera	Revista Mus. La Plata, Secc. Bot.	9(38)	62		1959					R						R					Native
Barnadesioideae	Barnadesieae	Dasyphyllum fodinarum (Gardner) Cabrera	Dasyphyllum	fodinarum	(Gardner) Cabrera	Revista Mus. La Plata, Secc. Bot.	9(38)	84		1959					R											Endemic
Barnadesioideae	Barnadesieae	Dasyphyllum horridum (Muschl.) Cabrera	Dasyphyllum	horridum	(Muschl.) Cabrera	Revista Mus. La Plata, Secc. Bot.	9(38)	49		1959												R				Endemic
Barnadesioideae	Barnadesieae	Dasyphyllum hystrix (Wedd.) Cabrera	Dasyphyllum	hystrix	(Wedd.) Cabrera	Revista Mus. La Plata, Secc. Bot.	9(38)	51		1959				R								R				Native
Barnadesioideae	Barnadesieae	Dasyphyllum inerme (Rusby) Cabrera	Dasyphyllum	inerme	(Rusby) Cabrera	Revista Mus. La Plata, Secc. Bot.	9(38)	64		1959	Barnadesia inermis Rusby		R	R												Native
Barnadesioideae	Barnadesieae	Dasyphyllum lanceolatum (Less.) Cabrera	Dasyphyllum	lanceolatum	(Less.) Cabrera	Revista Mus. La Plata, Secc. Bot.	9(38)	65		1959					R											Endemic
Barnadesioideae	Barnadesieae	Dasyphyllum latifolium (Gardner) Cabrera	Dasyphyllum	latifolium	(Gardner) Cabrera	Revista Mus. La Plata, Secc. Bot.	9(38)	88		1959				R												Endemic
Barnadesioideae	Barnadesieae	Dasyphyllum lehmannii (Hieron.) Cabrera	Dasyphyllum	lehmannii	(Hieron.) Cabrera	Revista Mus. La Plata, Secc. Bot.	9(38)	52		1959	Chuquiraga lehmannii Hieron.							R								Endemic	Critically Endangered
Barnadesioideae	Barnadesieae	Dasyphyllum leiocephalum (Wedd.) Cabrera	Dasyphyllum	leiocephalum	(Wedd.) Cabrera	Revista Mus. La Plata, Secc. Bot.	9(38)	50		1959				R								R				Native
Barnadesioideae	Barnadesieae	Dasyphyllum leptacanthum (Gardner) Cabrera	Dasyphyllum	leptacanthum	(Gardner) Cabrera	Revista Mus. La Plata, Secc. Bot.	9(38)	55		1959					R											Endemic
Barnadesioideae	Barnadesieae	Dasyphyllum maria-lianae Zardini & Soria	Dasyphyllum	maria-lianae	Zardini & Soria	Novon	4(1)	80		1994											R					Endemic
Barnadesioideae	Barnadesieae	Dasyphyllum popayanense (Hieron.) Cabrera	Dasyphyllum	popayanense	(Hieron.) Cabrera	Revista Mus. La Plata, Secc. Bot.	9(38)	67		1959	Chuquiraga popayanensis Hieron.						R	R								Native
Barnadesioideae	Barnadesieae	Dasyphyllum reticulatum (DC.) Cabrera	Dasyphyllum	reticulatum	(DC.) Cabrera	Revista Mus. La Plata, Secc. Bot.	9(38)	82		1959					R											Endemic
Barnadesioideae	Barnadesieae	Dasyphyllum retinens (S. Moore) Cabrera	Dasyphyllum	retinens	(S. Moore) Cabrera	Revista Mus. La Plata, Secc. Bot.	9(38)	72		1959	Chuquiraga retinens S. Moore				R											Endemic
Barnadesioideae	Barnadesieae	Dasyphyllum spinescens (Less.) Cabrera	Dasyphyllum	spinescens	(Less.) Cabrera	Revista Mus. La Plata, Secc. Bot.	9(38)	57		1959					R											Endemic	Least Concern
Barnadesioideae	Barnadesieae	Dasyphyllum sprengelianum (Gardner) Cabrera	Dasyphyllum	sprengelianum	(Gardner) Cabrera	Revista Mus. La Plata, Secc. Bot.	9(38)	90		1959					R											Endemic
Barnadesioideae	Barnadesieae	Dasyphyllum tomentosum (Spreng.) Cabrera	Dasyphyllum	tomentosum	(Spreng.) Cabrera	Revista Mus. La Plata, Secc. Bot.	9(38)	69		1959	Flotovia tomentosa Spreng., Chuquiraga tomentosa (Spreng.) Baker	Chuquiraga paniculata D. Don, Flotovia paniculata (D. Don) DC.	R													Endemic
Barnadesioideae	Barnadesieae	Dasyphyllum trichophyllum (Baker) Cabrera	Dasyphyllum	trichophyllum	(Baker) Cabrera	Revista Mus. La Plata, Secc. Bot.	9(38)	80		1959					R											Endemic
Barnadesioideae	Barnadesieae	Dasyphyllum vagans (Gardner) Cabrera	Dasyphyllum	vagans	(Gardner) Cabrera	Revista Mus. La Plata, Secc. Bot.	9(38)	58		1959					R											Endemic
Barnadesioideae	Barnadesieae	Dasyphyllum varians (Gardner) Cabrera	Dasyphyllum	varians	(Gardner) Cabrera	Candollea	52(1)	216		1997					R						R					Native
Barnadesioideae	Barnadesieae	Dasyphyllum velutinum (Baker) Cabrera	Dasyphyllum	velutinum	(Baker) Cabrera	Revista Mus. La Plata, Secc. Bot.	9(38)	84		1959				R												Endemic
Barnadesioideae	Barnadesieae	Dasyphyllum vepreculatum (D. Don) Cabrera	Dasyphyllum	vepreculatum	(D. Don) Cabrera	Revista Mus. La Plata, Secc. Bot.	9(38)	62		1959															R	Endemic
Barnadesioideae	Barnadesieae	Dasyphyllum weberbaueri (Tovar) Cabrera	Dasyphyllum	weberbaueri	(Tovar) Cabrera	Revista Mus. La Plata, Secc. Bot.	9(38)	66		1959												R				Endemic
Asteroideae	Heliantheae	Delilia biflora (L.) Kuntze	Delilia	biflora	(L.) Kuntze	Revis. Gen. Pl.	1	333		1891	Milleria biflora L., Elvira biflora (L.) DC.	Elvira martyni Cass; Elvira biflora (L.) DC.; Delilia berteroi Spreng; Meratia sprengelii Cass	R	R	R		R	R		R					R	Native
Asteroideae	Heliantheae	Delilia inelegans (Hook. f.) Kuntze	Delilia	inelegans	(Hook. f.) Kuntze	Revis. Gen. Pl.	1	333		1891	Desmocephalum inelegans Hook. f., Elvira inelegans (Hook. f.) B.L. Rob.							R								Endemic	Extinct
Asteroideae	Heliantheae	Delilia repens (Hook. f.) Kuntze	Delilia	repens	(Hook. f.) Kuntze	Revis. Gen. Pl.	1	333		1891	Microcoecia repens Hook. f., Elvira repens (Hook. f.) B.L. Rob.							R								Endemic
Asteroideae	Senecioneae	Dendrophorbium acuminatissimum (Cabrera) D.J.N. Hind	Dendrophorbium	acuminatissimum	(Cabrera) D.J.N. Hind	Kew Bull.	63(3)	515		2008				R												Endemic	Vulnerable
Asteroideae	Senecioneae	Dendrophorbium amplexicaule (Kunth) B. Nord.	Dendrophorbium	amplexicaule	(Kunth) B. Nord.	Compositae Newslett.	29	47		1996	Senecio amplexicaulis Kunth, Pentacalia amplexicaulis (Kunth) Cuatrec.							R								Endemic	Endangered
Asteroideae	Senecioneae	Dendrophorbium angelense (Domke) B. Nord.	Dendrophorbium	angelense	(Domke) B. Nord.	Compositae Newslett.	29	47		1996	Senecio angelensis Domke							R								Endemic	Endangered
Asteroideae	Senecioneae	Dendrophorbium arboluco (Cuatrec.) C. Jeffrey	Dendrophorbium	arboluco	(Cuatrec.) C. Jeffrey	Kew Bull.	47(1)	65		1992							R									Endemic
Asteroideae	Senecioneae	Dendrophorbium argutidentatum (Cuatrec.) H. Beltrán	Dendrophorbium	argutidentatum	(Cuatrec.) H. Beltrán	Compositae Newslett.	34	51		1999												R				Endemic
Asteroideae	Senecioneae	Dendrophorbium ayopayense (Cuatrec.) D.J.N. Hind	Dendrophorbium	ayopayense	(Cuatrec.) D.J.N. Hind	Kew Bull.	63(3)	515		2008				R												Endemic
Asteroideae	Senecioneae	Dendrophorbium azoguesense J. Calvo & Minga	Dendrophorbium	azoguesense	J. Calvo & Minga	Phytotaxa	402(3)	145	f. 1, 2	2019								R								Endemic
Asteroideae	Senecioneae	Dendrophorbium balsapampae (Cuatrec.) B. Nord.	Dendrophorbium	balsapampae	(Cuatrec.) B. Nord.	Compositae Newslett.	29	48		1996	Senecio balsapampae Cuatrec.						R	R								Native	Endangered
Asteroideae	Senecioneae	Dendrophorbium biacuminatum (Rusby) C. Jeffrey	Dendrophorbium	biacuminatum	(Rusby) C. Jeffrey	Kew Bull.	47(1)	65		1992				R								R				Native
Asteroideae	Senecioneae	Dendrophorbium biserrifolium (Kuntze) D.J.N. Hind	Dendrophorbium	biserrifolium	(Kuntze) D.J.N. Hind	Kew Bull.	63(3)	515		2008				R												Endemic	Near Threatened
Asteroideae	Senecioneae	Dendrophorbium bomanii (R.E. Fr.) C. Jeffrey	Dendrophorbium	bomanii	(R.E. Fr.) C. Jeffrey	Kew Bull.	47(1)	65		1992	Senecio bomanii R.E. Fr.		R	R												Native
Asteroideae	Senecioneae	Dendrophorbium brachycodon (Baker) C. Jeffrey	Dendrophorbium	brachycodon	(Baker) C. Jeffrey	Kew Bull.	47(1)	65		1992					R											Endemic
Asteroideae	Senecioneae	Dendrophorbium bradei (Cabrera) C. Jeffrey	Dendrophorbium	bradei	(Cabrera) C. Jeffrey	Kew Bull.	47(1)	65		1992					R											Endemic
Asteroideae	Senecioneae	Dendrophorbium buchtienii (Greenm.) C. Jeffrey	Dendrophorbium	buchtienii	(Greenm.) C. Jeffrey	Kew Bull.	47(1)	65		1992				R												Endemic
Asteroideae	Senecioneae	Dendrophorbium cabrerae (Cuatrec.) C. Jeffrey	Dendrophorbium	cabrerae	(Cuatrec.) C. Jeffrey	Kew Bull.	47(1)	66		1992				R												Endemic
Asteroideae	Senecioneae	Dendrophorbium cabrerianum (Greenm. & Cuatrec.) C. Jeffrey	Dendrophorbium	cabrerianum	(Greenm. & Cuatrec.) C. Jeffrey	Kew Bull.	47(1)	66		1992				R												Endemic
Asteroideae	Senecioneae	Dendrophorbium capixabense J. Calvo & Roque	Dendrophorbium	capixabense	J. Calvo & Roque	Phytotaxa	344(1)	48		2018					R											Endemic
Asteroideae	Senecioneae	Dendrophorbium castaneifolium (DC.) Pruski	Dendrophorbium	castaneifolium	(DC.) Pruski	Phytoneuron	2018–53	97		2018												R				Endemic
Asteroideae	Senecioneae	Dendrophorbium catharinense (Dusén ex Cabrera) C. Jeffrey	Dendrophorbium	catharinense	(Dusén ex Cabrera) C. Jeffrey	Kew Bull.	47(1)	66		1992	Senecio catharinensis Dusén ex Cabrera		R		R											Native
Asteroideae	Senecioneae	Dendrophorbium chaenocephalum (Cabrera) C. Jeffrey	Dendrophorbium	chaenocephalum	(Cabrera) C. Jeffrey	Kew Bull.	47(1)	66		1992				R												Endemic
Asteroideae	Senecioneae	Dendrophorbium chingualense (Cuatrec.) S. Díaz & Cuatrec.	Dendrophorbium	chingualense	(Cuatrec.) S. Díaz & Cuatrec.	Acad. Col. Ci. Exact., Fis. Nat.	12	19		1999							R									Endemic
Asteroideae	Senecioneae	Dendrophorbium chopinii Montesinos	Dendrophorbium	chopinii	Montesinos	Phytotaxa	313(2)	211		2017												R				Endemic
Asteroideae	Senecioneae	Dendrophorbium chulumanicum (Cabrera) S. Beck & D. Ibáñez	Dendrophorbium	chulumanicum	(Cabrera) S. Beck & D. Ibáñez	Monogr. Syst. Bot. Missouri Bot. Gard.	127	1271		2014				R												Endemic
Asteroideae	Senecioneae	Dendrophorbium coroicense (Rusby) C. Jeffrey	Dendrophorbium	coroicense	(Rusby) C. Jeffrey	Kew Bull.	47(1)	66		1992				R												Endemic	Least Concern
Asteroideae	Senecioneae	Dendrophorbium cosnipatense (Cabrera) H. Beltrán	Dendrophorbium	cosnipatense	(Cabrera) H. Beltrán	Compositae Newslett.	34	51		1999												R				Endemic
Asteroideae	Senecioneae	Dendrophorbium curvidens (Sch. Bip.) C. Jeffrey	Dendrophorbium	curvidens	(Sch. Bip.) C. Jeffrey	Kew Bull.	47(1)	66		1992				R												Endemic
Asteroideae	Senecioneae	Dendrophorbium dielsii C. Jeffrey	Dendrophorbium	dielsii	C. Jeffrey	Kew Bull.	47(1)	66		1992	Senecio dielsii Domke							R								Endemic	Data Deficient
Asteroideae	Senecioneae	Dendrophorbium dodsonii (H. Rob. & Cuatrec.) B. Nord.	Dendrophorbium	dodsonii	(H. Rob. & Cuatrec.) B. Nord.	Compositae Newslett.	29	48		1996	Pentacalia dodsonii H. Rob. & Cuatrec.							R								Endemic	Vulnerable
Asteroideae	Senecioneae	Dendrophorbium dolichodoryium (Cuatrec.) C. Jeffrey	Dendrophorbium	dolichodoryium	(Cuatrec.) C. Jeffrey	Kew Bull.	47(1)	66		1992												R				Endemic
Asteroideae	Senecioneae	Dendrophorbium elatum (Kunth) Pruski	Dendrophorbium	elatum	(Kunth) Pruski	Phytoneuron	2018–53	99		2018												R				Endemic
Asteroideae	Senecioneae	Dendrophorbium fastigiaticephalum (Cabrera) C. Jeffrey	Dendrophorbium	fastigiaticephalum	(Cabrera) C. Jeffrey	Kew Bull.	47(1)	66		1992					R											Endemic
Asteroideae	Senecioneae	Dendrophorbium fortunatum (Cuatrec.) C. Jeffrey	Dendrophorbium	fortunatum	(Cuatrec.) C. Jeffrey	Kew Bull.	47(1)	66		1992				R								R				Native
Asteroideae	Senecioneae	Dendrophorbium fruticosum (Vell.) C. Jeffrey	Dendrophorbium	fruticosum	(Vell.) C. Jeffrey	Kew Bull.	47(1)	66		1992					R											Endemic
Asteroideae	Senecioneae	Dendrophorbium gesnerifolium (Cuatrec.) B. Nord.	Dendrophorbium	gesnerifolium	(Cuatrec.) B. Nord.	Compositae Newslett.	29	48		1996	Senecio gesneriifolius Cuatrec.							R								Endemic	Endangered
Asteroideae	Senecioneae	Dendrophorbium glaziovii (Baker) C. Jeffrey	Dendrophorbium	glaziovii	(Baker) C. Jeffrey	Kew Bull.	47(1)	67		1992					R											Endemic	Near Threatened
Asteroideae	Senecioneae	Dendrophorbium goodspeedii (Cuatrec.) H. Beltrán	Dendrophorbium	goodspeedii	(Cuatrec.) H. Beltrán	Compositae Newslett.	34	51		1999												R				Endemic
Asteroideae	Senecioneae	Dendrophorbium huasense (Cuatrec.) Pruski	Dendrophorbium	huasense	(Cuatrec.) Pruski	Phytoneuron	2018–53	102		2018												R				Endemic
Asteroideae	Senecioneae	Dendrophorbium ingens (Benoist) B. Nord.	Dendrophorbium	ingens	(Benoist) B. Nord.	Compositae Newslett.	29	48		1996	Senecio ingens Benoist							R								Endemic	Vulnerable
Asteroideae	Senecioneae	Dendrophorbium krukoffii (Cuatrec.) C. Jeffrey	Dendrophorbium	krukoffii	(Cuatrec.) C. Jeffrey	Kew Bull.	47(1)	67		1992				R												Endemic
Asteroideae	Senecioneae	Dendrophorbium limosum (Dusén) C. Jeffrey	Dendrophorbium	limosum	(Dusén) C. Jeffrey	Kew Bull.	47(1)	67		1992					R											Endemic
Asteroideae	Senecioneae	Dendrophorbium llewelynii (Cuatrec.) H. Beltrán	Dendrophorbium	llewelynii	(Cuatrec.) H. Beltrán	Compositae Newslett.	34	51		1999												R				Endemic
Asteroideae	Senecioneae	Dendrophorbium lloense (Hieron.) C. Jeffrey	Dendrophorbium	lloense	(Hieron.) C. Jeffrey	Kew Bull.	47(1)	67		1992	Senecio lloensis Hieron.						R	R								Native
Asteroideae	Senecioneae	Dendrophorbium longilinguae (Cuatrec.) C. Jeffrey	Dendrophorbium	longilinguae	(Cuatrec.) C. Jeffrey	Kew Bull.	47(1)	67		1992				R												Endemic
Asteroideae	Senecioneae	Dendrophorbium medullosum (Sch. Bip. ex Greenm.) C. Jeffrey	Dendrophorbium	medullosum	(Sch. Bip. ex Greenm.) C. Jeffrey	Kew Bull.	47(1)	67		1992				R												Endemic
Asteroideae	Senecioneae	Dendrophorbium moscopanum (Cuatrec.) C. Jeffrey	Dendrophorbium	moscopanum	(Cuatrec.) C. Jeffrey	Kew Bull.	47(1)	66		1992	Senecio moscopanus Cuatrec.						R	R								Native
Asteroideae	Senecioneae	Dendrophorbium multinerve (Sch. Bip. ex Klatt) C. Jeffrey	Dendrophorbium	multinerve	(Sch. Bip. ex Klatt) C. Jeffrey	Kew Bull.	47(1)	67		1992				R												Endemic
Asteroideae	Senecioneae	Dendrophorbium onae (Cuatrec.) C. Jeffrey	Dendrophorbium	onae	(Cuatrec.) C. Jeffrey	Kew Bull.	47(1)	67		1992	Senecio onae Cuatrec., Pentacalia onae (Cuatrec.) Cuatrec.							R								Endemic	Near Threatened
Asteroideae	Senecioneae	Dendrophorbium paranense (Malme) Matzenb. & Baptista	Dendrophorbium	paranense	(Malme) Matzenb. & Baptista	Bol. Mus. Bot. Munic.	65	2	f. 1	1997					R											Endemic
Asteroideae	Senecioneae	Dendrophorbium pellucidinerve (Sch. Bip. ex Baker) C. Jeffrey	Dendrophorbium	pellucidinerve	(Sch. Bip. ex Baker) C. Jeffrey	Kew Bull.	47(1)	68		1992					R											Endemic
Asteroideae	Senecioneae	Dendrophorbium peregrinum (Griseb.) C. Jeffrey	Dendrophorbium	peregrinum	(Griseb.) C. Jeffrey	Kew Bull.	47(1)	68		1992	Senecio peregrinus Griseb.		R	R												Native
Asteroideae	Senecioneae	Dendrophorbium pericaule (Greenm.) B. Nord.	Dendrophorbium	pericaule	(Greenm.) B. Nord.	Compositae Newslett.	31	22		1997	Senecio pericaulis Greenm.							R								Endemic	Vulnerable
Asteroideae	Senecioneae	Dendrophorbium pluricephalum (Cabrera) C. Jeffrey	Dendrophorbium	pluricephalum	(Cabrera) C. Jeffrey	Kew Bull.	47(1)	68		1992	Senecio pluricephalus Cabrera,	Senecio myriocephalus Baker, Senecio missionum Cabrera, Dendrophorbium missionum (Cabrera) C. Jeffrey	R		R						R					Native
Asteroideae	Senecioneae	Dendrophorbium pururu (Cuatrec.) C. Jeffrey	Dendrophorbium	pururu	(Cuatrec.) C. Jeffrey	Kew Bull.	47(1)	68		1992	Senecio pururu Cuatrec.							R								Endemic	Vulnerable
Asteroideae	Senecioneae	Dendrophorbium reflexum (Kunth) C. Jeffrey	Dendrophorbium	reflexum	(Kunth) C. Jeffrey	Kew Bull.	47(1)	68		1992	Senecio reflexus Kunth, Pentacalia reflexa (Kunth) Cuatrec.			R			R					R			R	Native
Asteroideae	Senecioneae	Dendrophorbium restingae A.M. Teles, J.N. Nakaj. & Stehmann	Dendrophorbium	restingae	A.M. Teles, J.N. Nakaj. & Stehmann	Sida	22(1)	123	f. 1, 2	2006					R											Endemic
Asteroideae	Senecioneae	Dendrophorbium scytophyllum (Kunth) C. Jeffrey	Dendrophorbium	scytophyllum	(Kunth) C. Jeffrey	Kew Bull.	47(1)	68		1992	Senecio scytophyllus Kunth, Pentacalia scytophylla (Kunth) Cuatrec.							R								Endemic	Vulnerable
Asteroideae	Senecioneae	Dendrophorbium sibundoyense (Cuatrec.) C. Jeffrey	Dendrophorbium	sibundoyense	(Cuatrec.) C. Jeffrey	Kew Bull.	47(1)	68		1992	Senecio sibundoyensis Cuatrec.						R	R								Native
Asteroideae	Senecioneae	Dendrophorbium silvani (Cuatrec.) C. Jeffrey	Dendrophorbium	silvani	(Cuatrec.) C. Jeffrey	Kew Bull.	47(1)	68		1992							R									Endemic
Asteroideae	Senecioneae	Dendrophorbium solisii (Cuatrec.) B. Nord.	Dendrophorbium	solisii	(Cuatrec.) B. Nord.	Compositae Newslett.	29	48		1996	Senecio solisii Cuatrec.							R								Endemic	Vulnerable
Asteroideae	Senecioneae	Dendrophorbium storkii (Cuatrec.) C. Jeffrey	Dendrophorbium	storkii	(Cuatrec.) C. Jeffrey	Kew Bull.	47(1)	68		1992												R				Endemic
Asteroideae	Senecioneae	Dendrophorbium subnemorale (Dusén) A.M. Teles	Dendrophorbium	subnemorale	(Dusén) A.M. Teles	Rodriguésia	61(1)	143		2010					R											Endemic
Asteroideae	Senecioneae	Dendrophorbium tabacifolium (Rusby) C. Jeffrey	Dendrophorbium	tabacifolium	(Rusby) C. Jeffrey	Kew Bull.	47(1)	68		1992				R												Endemic
Asteroideae	Senecioneae	Dendrophorbium tipocochensis (Domke) B. Nord.	Dendrophorbium	tipocochensis	(Domke) B. Nord.	Compositae Newslett.	29	48		1996	Senecio tipocochensis Domke						R	R								Native	Near Threatened
Asteroideae	Senecioneae	Dendrophorbium trigynum (Cuatrec.) H. Beltrán	Dendrophorbium	trigynum	(Cuatrec.) H. Beltrán	Compositae Newslett.	34	51		1999												R				Endemic
Asteroideae	Senecioneae	Dendrophorbium usgorense (Cuatrec.) C. Jeffrey	Dendrophorbium	usgorense	(Cuatrec.) C. Jeffrey	Kew Bull.	47(1)	69		1992	Senecio usgorensis Cuatrec.											R				Endemic
Asteroideae	Senecioneae	Dendrophorbium vanillodorum (Cabrera) H. Beltrán	Dendrophorbium	vanillodorum	(Cabrera) H. Beltrán	Compositae Newslett.	34	51		1999	Senecio vanillodorus Cabrera											R				Endemic
Asteroideae	Senecioneae	Dendrophorbium vargasii (Cabrera) H. Beltrán	Dendrophorbium	vargasii	(Cabrera) H. Beltrán	Compositae Newslett.	34	51		1999												R				Endemic
Asteroideae	Senecioneae	Dendrophorbium varicosum J. Calvo	Dendrophorbium	varicosum	J. Calvo	Phytotaxa	402(3)	146		2019				R												Endemic
Asteroideae	Senecioneae	Dendrophorbium yungasense (Britton) C. Jeffrey	Dendrophorbium	yungasense	(Britton) C. Jeffrey	Kew Bull.	47(1)	69		1992				R												Endemic
Cichorioideae	Cichorieae	Dendroseris berteroana (Decne.) Hook. & Arn.	Dendroseris	berteroana	(Decne.) Hook. & Arn.	Companion Bot. Mag.	1(1)	32		1835						R										Endemic	Critically Endangered
Cichorioideae	Cichorieae	Dendroseris gigantea Johow	Dendroseris	gigantea	Johow	Estud. H. Juan Fernandez		69		1896						R										Endemic	Critically Endangered
Cichorioideae	Cichorieae	Dendroseris litoralis Skottsb.	Dendroseris	litoralis	Skottsb.	Nat. Hist. Juan Fernandez (Botany)	2	204		1921						R										Endemic	Critically Endangered
Cichorioideae	Cichorieae	Dendroseris macrantha (Bertero ex Decne.) Skottsb.	Dendroseris	macrantha	(Bertero ex Decne.) Skottsb.	Nat. Hist. Juan Fernandez (Botany)	2	202		1921						R										Endemic	Critically Endangered
Cichorioideae	Cichorieae	Dendroseris macrophylla D. Don	Dendroseris	macrophylla	D. Don	Philos. Mag. Ann. Chem.	11	388		1832						R										Endemic	Critically Endangered
Cichorioideae	Cichorieae	Dendroseris marginata (Bertero ex Decne.) Hook. & Arn.	Dendroseris	marginata	(Bertero ex Decne.) Hook. & Arn.	Companion Bot. Mag.	1(1)	32		1835						R										Endemic	Critically Endangered
Cichorioideae	Cichorieae	Dendroseris micrantha (Bertero ex Decne.) Hook. & Arn.	Dendroseris	micrantha	(Bertero ex Decne.) Hook. & Arn.	Companion Bot. Mag.	1(1)	32		1835						R										Endemic	Critically Endangered
Cichorioideae	Cichorieae	Dendroseris neriifolia (Decne.) Hook. & Arn.	Dendroseris	neriifolia	(Decne.) Hook. & Arn.	Companion Bot. Mag.	1(1)	32		1835						R										Endemic	Critically Endangered
Cichorioideae	Cichorieae	Dendroseris pinnata (Bertero ex Decne.) Hook. & Arn.	Dendroseris	pinnata	(Bertero ex Decne.) Hook. & Arn.	Companion Bot. Mag.	1(1)	32		1835						R										Endemic	Critically Endangered
Cichorioideae	Cichorieae	Dendroseris pruinata (Johow) Skottsb.	Dendroseris	pruinata	(Johow) Skottsb.	Nat. Hist. Juan Fernandez (Botany)	2	207		1921						R										Endemic	Critically Endangered
Cichorioideae	Cichorieae	Dendroseris regia Skottsb.	Dendroseris	regia	Skottsb.	Nat. Hist. Juan Fernandez (Botany)	2	205		1921						R										Endemic	Critically Endangered
Asteroideae	Millerieae	Desmanthodium blepharopodum S.F. Blake	Desmanthodium	blepharopodum	S.F. Blake	J. Wash. Acad. Sci.	14(19)	454		1924															R	Endemic
Asteroideae	Eupatorieae	Diacranthera crenata (Schltdl. ex Mart.) R.M. King & H. Rob.	Diacranthera	crenata	(Schltdl. ex Mart.) R.M. King & H. Rob.	Phytologia	24(3)	193		1972	Campuloclinium crenatum Schltdl. ex Mart.				R											Endemic
Asteroideae	Eupatorieae	Diacranthera hebeclinia H. Rob.	Diacranthera	hebeclinia	H. Rob.	Phytologia	88(2)	144	f. 4	2006					R											Endemic
Asteroideae	Eupatorieae	Diacranthera ulei R.M. King & H. Rob.	Diacranthera	ulei	R.M. King & H. Rob.	Phytologia	24(3)	193		1972					R											Endemic
Vernonioideae	Liabeae	Dillandia chachapoyensis (H. Rob.) V.A. Funk & H. Rob.	Dillandia	chachapoyensis	(H. Rob.) V.A. Funk & H. Rob.	Syst. Bot.	26(2)	221		2001												R				Endemic
Vernonioideae	Liabeae	Dillandia perfoliata (S.F. Blake) V.A. Funk & H. Rob.	Dillandia	perfoliata	(S.F. Blake) V.A. Funk & H. Rob.	Syst. Bot.	26(2)	219		2001	Liabum perfoliatum S.F. Blake, Munnozia perfoliata (S.F. Blake) H. Rob. & Brettell						R	R								Native
Vernonioideae	Liabeae	Dillandia subumbellata V.A. Funk & H. Rob.	Dillandia	subumbellata	V.A. Funk & H. Rob.	Syst. Bot.	26(2)	224		2001								R				R				Native
Asteroideae	Heliantheae	Dimerostemma annuum (Hassl.) H. Rob.	Dimerostemma	annuum	(Hassl.) H. Rob.	Proc. Biol. Soc. Washington	97(3)	621		1984					R						R					Native
Asteroideae	Heliantheae	Dimerostemma apense (Chodat) M.D. Moraes	Dimerostemma	apense	(Chodat) M.D. Moraes	Phytologia	89(1)	117		2007	Aspilia apensis Chodat; Zexmenia apensis (Chodat) Hassl; Wedelia apensis (Chodat) B.L. Turner; Angelphytum apensis (Chodat) A.A. Sáenz; Angelphytum apense (Chodat) Pruski		R	R	R						R					Native
Asteroideae	Heliantheae	Dimerostemma arnottii (Baker) M.D. Moraes	Dimerostemma	arnottii	(Baker) M.D. Moraes	Phytologia	89(1)	117		2007	Verbesina arnottii Baker; Zexmenia arnottii (Baker) Hassl.; Angelphytum arnotti (Baker) H. Rob.	Verbesina paraguariensis Chodat; Zexmenia paraguariensis (Chodat) S.F. Blake; Angelphytum paraguariense (Chodat) H. Rob.; Verbesina arnottii Baker var. angustifolia Chodat; Verbesina arnottii Baker fo. gracilis Chodat; Verbesina arnottii Baker var. oblongifolia Chodat; Verbesina arnottii Baker fo. scabriuscula Chodat; Verbesina arnottii Baker var. tomentosa Chodat; Zexmenia arnottii (Baker) Hassl…	R		R						R			R		Native
Asteroideae	Heliantheae	Dimerostemma asperatum S.F. Blake	Dimerostemma	asperatum	S.F. Blake	Contr. Gray Herb.	52	12		1917				R												Endemic	Least Concern
Asteroideae	Heliantheae	Dimerostemma aspilioides (Griseb.) M.D. Moraes	Dimerostemma	aspilioides	(Griseb.) M.D. Moraes	Phytologia	89(1)	117		2007	Verbesina aspilioides Griseb.; Zexmenia aspilioides (Griseb.) Hass.l; Angelphytum aspiliodes (Griseb.) H. Rob.		R	R	R						R					Native
Asteroideae	Heliantheae	Dimerostemma bahiense (H. Rob.) M.D. Moraes	Dimerostemma	bahiense	(H. Rob.) M.D. Moraes	Phytologia	89(1)	117		2007					R											Endemic
Asteroideae	Heliantheae	Dimerostemma bishopii H. Rob.	Dimerostemma	bishopii	H. Rob.	Phytologia	49(3)	275		1981					R											Endemic
Asteroideae	Heliantheae	Dimerostemma brasilianum Cass.	Dimerostemma	brasilianum	Cass.	Bull. Sci. Soc. Philom. Paris	1818	58		1818				R	R											Native
Asteroideae	Heliantheae	Dimerostemma episcopale (H. Rob.) H. Rob.	Dimerostemma	episcopale	(H. Rob.) H. Rob.	Proc. Biol. Soc. Washington	97(3)	623		1984					R											Endemic
Asteroideae	Heliantheae	Dimerostemma goyazense (Gardner) M.D. Moraes	Dimerostemma	goyazense	(Gardner) M.D. Moraes	Phytologia	89(1)	117		2007					R											Endemic
Asteroideae	Heliantheae	Dimerostemma grazielae H. Rob.	Dimerostemma	grazielae	H. Rob.	Proc. Biol. Soc. Washington	97(3)	623		1984					R											Endemic
Asteroideae	Heliantheae	Dimerostemma grisebachii (Baker) M.D. Moraes	Dimerostemma	grisebachii	(Baker) M.D. Moraes	Phytologia	89(1)	118		2007	Verbesina grisebachii Baker; Zexmenia grisebachii (Baker) Hassl.; Angelphytum grisebachii (Baker) H. Rob.		R	R	R						R			R		Native
Asteroideae	Heliantheae	Dimerostemma herzogii (Hassl.) M.D. Moraes	Dimerostemma	herzogii	(Hassl.) M.D. Moraes	Phytologia	89(1)	118		2007				R												Endemic
Asteroideae	Heliantheae	Dimerostemma hieronymi (Hassl.) M.D. Moraes	Dimerostemma	hieronymi	(Hassl.) M.D. Moraes	Phytologia	89(1)	118		2007	Zexmenia hieronymi Hassl.; Angelphytum hieronymi (Hassl.) H. Rob.		R													Endemic
Asteroideae	Heliantheae	Dimerostemma humboldtianum (Gardner) H. Rob.	Dimerostemma	humboldtianum	(Gardner) H. Rob.	Proc. Biol. Soc. Washington	97(3)	624		1984					R											Endemic
Asteroideae	Heliantheae	Dimerostemma indutum (Chodat) M.D. Moraes	Dimerostemma	indutum	(Chodat) M.D. Moraes	Phytologia	89(1)	118		2007				R							R					Native
Asteroideae	Heliantheae	Dimerostemma lippioides (Baker) S.F. Blake	Dimerostemma	lippioides	(Baker) S.F. Blake	Contr. Gray Herb.	52	15		1917					R											Endemic
Asteroideae	Heliantheae	Dimerostemma myrtifolium (Chodat) M.D. Moraes	Dimerostemma	myrtifolium	(Chodat) M.D. Moraes	Phytologia	89(1)	118		2007					R						R					Native
Asteroideae	Heliantheae	Dimerostemma oblongum (Gardner) M.D. Moraes	Dimerostemma	oblongum	(Gardner) M.D. Moraes	Brittonia	61(4)	358		2009					R											Endemic
Asteroideae	Heliantheae	Dimerostemma paneroi M.D. Moraes	Dimerostemma	paneroi	M.D. Moraes	Brittonia	61(4)	358	f. 4	2009					R											Endemic
Asteroideae	Heliantheae	Dimerostemma pseudosilphioides (Hassl.) M.D. Moraes	Dimerostemma	pseudosilphioides	(Hassl.) M.D. Moraes	Phytologia	89(1)	118		2007					R						R					Native
Asteroideae	Heliantheae	Dimerostemma reitzii (H. Rob.) M.D. Moraes	Dimerostemma	reitzii	(H. Rob.) M.D. Moraes	Phytologia	89(1)	119		2007	Angelphytum reitzii H. Rob.	Zexmenia arnottii (Baker) Hassl. fo. angustissima Hassl.; Angelphytum hatschbachii H. Rob.; Dimerostemma hatschbachii (H. Rob.) M.D. Moraes	R		R						R					Native
Asteroideae	Heliantheae	Dimerostemma retifolium (Sch. Bip. ex Baker) S.F. Blake	Dimerostemma	retifolium	(Sch. Bip. ex Baker) S.F. Blake	Contr. Gray Herb.	52	11		1917					R											Endemic
Asteroideae	Heliantheae	Dimerostemma scabrosum V.R. Bueno & J.N. Nakaj.	Dimerostemma	scabrosum	V.R. Bueno & J.N. Nakaj.	Phytotaxa	472(1)	41	f. 2	2020					R											Endemic
Asteroideae	Heliantheae	Dimerostemma tenuifolium (Hassl.) M.D. Moraes	Dimerostemma	tenuifolium	(Hassl.) M.D. Moraes	Phytologia	89(1)	119		2007	Zexmenia tenuifolia Hassl.; Angelphytum tenuifolium (Hassl.) H. Rob.		R		R						R					Native
Asteroideae	Heliantheae	Dimerostemma vestitum (Baker) S.F. Blake	Dimerostemma	vestitum	(Baker) S.F. Blake	Contr. Gray Herb.	52	11		1917				R	R											Native
Asteroideae	Heliantheae	Dimerostemma virgosum H. Rob.	Dimerostemma	virgosum	H. Rob.	Proc. Biol. Soc. Washington	97(3)	625		1984				R	R											Native
Stifftioideae	Stifftieae	Dinoseris salicifolia Griseb.	Dinoseris	salicifolia	Griseb.	Abh. Königl. Ges. Wiss. Göttingen	24	214		1879				R												Endemic	Least Concern
Asteroideae	Astereae	Diplostephium abietinum S.F. Blake	Diplostephium	abietinum	S.F. Blake	J. Wash. Acad. Sci.	40(2)	48		1950												R				Endemic
Asteroideae	Astereae	Diplostephium affine Wedd.	Diplostephium	affine	Wedd.	Chlor. Andina	1(7)	203		1857												R				Endemic
Asteroideae	Astereae	Diplostephium antisanense Hieron.	Diplostephium	antisanense	Hieron.	Bot. Jahrb. Syst.	21(3)	338		1896								R								Endemic	Least Concern
Asteroideae	Astereae	Diplostephium asplundii Cuatrec.	Diplostephium	asplundii	Cuatrec.	Phytologia	23(4)	352		1972								R								Endemic	Vulnerable
Asteroideae	Astereae	Diplostephium azureum Cuatrec.	Diplostephium	azureum	Cuatrec.	Brittonia	8(3)	179		1956												R				Endemic
Asteroideae	Astereae	Diplostephium barclayanum Cuatrec.	Diplostephium	barclayanum	Cuatrec.	Proc. Biol. Soc. Washington	77	127		1964								R								Endemic	Vulnerable
Asteroideae	Astereae	Diplostephium cajamarquillense Cuatrec.	Diplostephium	cajamarquillense	Cuatrec.	Brittonia	8(3)	180		1956												R				Endemic
Asteroideae	Astereae	Diplostephium callaense Cuatrec.	Diplostephium	callaense	Cuatrec.	Proc. Biol. Soc. Washington	77	130		1964												R				Endemic
Asteroideae	Astereae	Diplostephium callilepis S.F. Blake	Diplostephium	callilepis	S.F. Blake	Amer. J. Bot.	15(1)	51		1928												R				Endemic
Asteroideae	Astereae	Diplostephium carabayense Wedd.	Diplostephium	carabayense	Wedd.	Chlor. Andina	1(7)	202		1857												R				Endemic
Asteroideae	Astereae	Diplostephium cinereum Cuatrec.	Diplostephium	cinereum	Cuatrec.	Caldasia	2(8)	228		1943				R		R						R				Native	Endangered
Asteroideae	Astereae	Diplostephium crypteriophyllum Cuatrec.	Diplostephium	crypteriophyllum	Cuatrec.	Brittonia	8(1)	47		1954								R								Endemic	Endangered
Asteroideae	Astereae	Diplostephium dentatum Cuatrec.	Diplostephium	dentatum	Cuatrec.	Caldasia	2(8)	218		1943							R									Endemic	Critically Endangered
Asteroideae	Astereae	Diplostephium empetrifolium S.F. Blake	Diplostephium	empetrifolium	S.F. Blake	Contr. U.S. Natl. Herb.	24(3)	73		1922								R				R				Native
Asteroideae	Astereae	Diplostephium ericoides (Lam.) Cabrera	Diplostephium	ericoides	(Lam.) Cabrera	Bol. Soc. Argent. Bot.	7(3-4)	239		1959	Conyza ericoides Lam., Baccharis ericoides (Lam.) Pers., Liabum ericoides (Lam.) Less., Piptolepis ericoides (Lam.) Sch. Bip., Vernonia ericoides (Lam.) Less.	Aster lavandulaceus Willd., Aster lavandulaceus Willd. ex DC., Diplostephium lavandulifolium Kunth, Diplopappus lavandulifolius (Kunth) Cass., Linochilus lavandulifolius Sch. Bip., Diplostephium antisanense Hieron., Diplostephium antisanense f. antisanense, Diplostephium antisanense f. rhodopappus Cuatrec., Diplostephium pycnophyllum S.F.Blake						R								Endemic	Least Concern
[truncated: 4,941 more rows]
